# Supplementary material
Source: publisher figshare collection journal article supplement (https://acs.figshare.com/ndownloader/files/3833335)
Supplement: Supplementary file 1 [file 3833335]

 
data_phosphinimine 
  
_audit_creation_method            'SHELXL-2014/7' 
_shelx_SHELXL_version_number      '2014/7' 
_chemical_name_systematic         ? 
_chemical_name_common             ? 
_chemical_melting_point           ? 
_chemical_formula_moiety          'C29 H58 N6 P, B F4' 
_chemical_formula_sum 
 'C29 H58 B F4 N6 P' 
_chemical_formula_weight          608.59 
  
loop_ 
 _atom_type_symbol 
 _atom_type_description 
 _atom_type_scat_dispersion_real 
 _atom_type_scat_dispersion_imag 
 _atom_type_scat_source 
 'C'  'C'   0.0033   0.0016 
 'International Tables Vol C Tables 4.2.6.8 and 6.1.1.4' 
 'H'  'H'   0.0000   0.0000 
 'International Tables Vol C Tables 4.2.6.8 and 6.1.1.4' 
 'B'  'B'   0.0013   0.0007 
 'International Tables Vol C Tables 4.2.6.8 and 6.1.1.4' 
 'N'  'N'   0.0061   0.0033 
 'International Tables Vol C Tables 4.2.6.8 and 6.1.1.4' 
 'F'  'F'   0.0171   0.0103 
 'International Tables Vol C Tables 4.2.6.8 and 6.1.1.4' 
 'P'  'P'   0.1023   0.0942 
 'International Tables Vol C Tables 4.2.6.8 and 6.1.1.4' 
  
_space_group_crystal_system       monoclinic 
_space_group_IT_number            14 
_space_group_name_H-M_alt         'P 21/n' 
_space_group_name_Hall            '-P 2yn' 
  
_shelx_space_group_comment 
; 
The symmetry employed for this shelxl refinement is uniquely defined 
by the following loop, which should always be used as a source of 
symmetry information in preference to the above space-group names. 
They are only intended as comments. 
; 
  
loop_ 
 _space_group_symop_operation_xyz 
 'x, y, z' 
 '-x+1/2, y+1/2, -z+1/2' 
 '-x, -y, -z' 
 'x-1/2, -y-1/2, z-1/2' 
  
_cell_length_a                    12.4622(19) 
_cell_length_b                    14.832(2) 
_cell_length_c                    19.373(3) 
_cell_angle_alpha                 90 
_cell_angle_beta                  108.269(2) 
_cell_angle_gamma                 90 
_cell_volume                      3400.3(9) 
_cell_formula_units_Z             4 
_cell_measurement_temperature     130(2) 
_cell_measurement_reflns_used     9848 
_cell_measurement_theta_min       2.21 
_cell_measurement_theta_max       30.49 
  
_exptl_crystal_description        plate 
_exptl_crystal_colour             colorless 
_exptl_crystal_density_meas       ? 
_exptl_crystal_density_method     ? 
_exptl_crystal_density_diffrn     1.189 
_exptl_crystal_F_000              1320 
_exptl_transmission_factor_min    ? 
_exptl_transmission_factor_max    ? 
_exptl_crystal_size_max           0.820 
_exptl_crystal_size_mid           0.440 
_exptl_crystal_size_min           0.110 
_exptl_absorpt_coefficient_mu     0.131 
_shelx_estimated_absorpt_T_min    0.900 
_shelx_estimated_absorpt_T_max    0.986 
_exptl_absorpt_correction_type    empirical 
_exptl_absorpt_correction_T_min   .6043 
_exptl_absorpt_correction_T_max   .7461 
_exptl_absorpt_process_details    sadabs 
_exptl_absorpt_special_details    ? 
_diffrn_ambient_temperature       130(2) 
_diffrn_radiation_wavelength      0.71073 
_diffrn_radiation_type            MoK\a 
_diffrn_source                    ? 
_diffrn_measurement_device_type   'Bruker APEX-II CCD' 
_diffrn_measurement_method        '\f and \w scans' 
_diffrn_detector_area_resol_mean  ? 
_diffrn_reflns_number             49592 
_diffrn_reflns_av_unetI/netI      0.0354 
_diffrn_reflns_av_R_equivalents   0.0492 
_diffrn_reflns_limit_h_min        -17 
_diffrn_reflns_limit_h_max        17 
_diffrn_reflns_limit_k_min        -21 
_diffrn_reflns_limit_k_max        21 
_diffrn_reflns_limit_l_min        -27 
_diffrn_reflns_limit_l_max        27 
_diffrn_reflns_theta_min          1.730 
_diffrn_reflns_theta_max          30.501 
_diffrn_reflns_theta_full         25.000 
_diffrn_measured_fraction_theta_max   0.958 
_diffrn_measured_fraction_theta_full  0.993 
_diffrn_reflns_Laue_measured_fraction_max    0.958 
_diffrn_reflns_Laue_measured_fraction_full   0.993 
_diffrn_reflns_point_group_measured_fraction_max   0.958 
_diffrn_reflns_point_group_measured_fraction_full  0.993 
_reflns_number_total              9935 
_reflns_number_gt                 8156 
_reflns_threshold_expression      'I > 2\s(I)' 
_reflns_Friedel_coverage          0.000 
_reflns_Friedel_fraction_max      . 
_reflns_Friedel_fraction_full     . 
  
_reflns_special_details 
; 
 Reflections were merged by SHELXL according to the crystal 
 class for the calculation of statistics and refinement. 
  
 _reflns_Friedel_fraction is defined as the number of unique 
 Friedel pairs measured divided by the number that would be 
 possible theoretically, ignoring centric projections and 
 systematic absences. 
; 
  
_computing_data_collection        'Bruker APEX2' 
_computing_cell_refinement        'Bruker SAINT' 
_computing_data_reduction         'Bruker SAINT' 
_computing_structure_solution     'SHELXS-97 (Sheldrick 2008)' 
_computing_structure_refinement 'SHELXL-2014/7 (Sheldrick, 2014)' 
_computing_molecular_graphics     'Bruker SHELXTL' 
_computing_publication_material   'Bruker SHELXTL' 
_refine_special_details           ? 
_refine_ls_structure_factor_coef  Fsqd 
_refine_ls_matrix_type            full 
_refine_ls_weighting_scheme       calc 
_refine_ls_weighting_details 
'w=1/[\s^2^(Fo^2^)+(0.0553P)^2^+4.0633P] where P=(Fo^2^+2Fc^2^)/3' 
_atom_sites_solution_primary      ? 
_atom_sites_solution_secondary    ? 
_atom_sites_solution_hydrogens    mixed 
_refine_ls_hydrogen_treatment     mixed 
_refine_ls_extinction_method      none 
_refine_ls_extinction_coef        . 
_refine_ls_number_reflns          9935 
_refine_ls_number_parameters      385 
_refine_ls_number_restraints      0 
_refine_ls_R_factor_all           0.0815 
_refine_ls_R_factor_gt            0.0687 
_refine_ls_wR_factor_ref          0.1668 
_refine_ls_wR_factor_gt           0.1577 
_refine_ls_goodness_of_fit_ref    1.112 
_refine_ls_restrained_S_all       1.112 
_refine_ls_shift/su_max           0.000 
_refine_ls_shift/su_mean          0.000 
  
loop_ 
 _atom_site_label 
 _atom_site_type_symbol 
 _atom_site_fract_x 
 _atom_site_fract_y 
 _atom_site_fract_z 
 _atom_site_U_iso_or_equiv 
 _atom_site_adp_type 
 _atom_site_occupancy 
 _atom_site_site_symmetry_order 
 _atom_site_calc_flag 
 _atom_site_refinement_flags_posn 
 _atom_site_refinement_flags_adp 
 _atom_site_refinement_flags_occupancy 
 _atom_site_disorder_assembly 
 _atom_site_disorder_group 
P1 P 0.64828(4) 0.60018(3) 0.33122(2) 0.01477(10) Uani 1 1 d . . . . . 
N1 N 0.57291(13) 0.51002(10) 0.30469(8) 0.0207(3) Uani 1 1 d . . . . . 
N2 N 0.58120(12) 0.67385(10) 0.26810(8) 0.0174(3) Uani 1 1 d . . . . . 
N3 N 0.64685(13) 0.62247(11) 0.41368(8) 0.0198(3) Uani 1 1 d . . . . . 
N4 N 0.79291(13) 0.55969(11) 0.15385(8) 0.0221(3) Uani 1 1 d . . . . . 
N5 N 1.04555(13) 0.61264(12) 0.31624(9) 0.0238(3) Uani 1 1 d . . . . . 
N6 N 0.77893(12) 0.59979(11) 0.34095(8) 0.0192(3) Uani 1 1 d . . . . . 
B1 B 0.2934(2) 0.49040(19) 0.11677(14) 0.0356(5) Uani 1 1 d . . . . . 
F1 F 0.2437(2) 0.41073(15) 0.08941(12) 0.0864(7) Uani 1 1 d . . . . . 
F2 F 0.22672(18) 0.54618(17) 0.14277(13) 0.0828(7) Uani 1 1 d . . . . . 
F3 F 0.39238(18) 0.47629(14) 0.17050(11) 0.0827(7) Uani 1 1 d . . . . . 
F4 F 0.3165(2) 0.53624(14) 0.06130(9) 0.0707(6) Uani 1 1 d . . . . . 
C1 C 0.84233(14) 0.57786(11) 0.22347(9) 0.0178(3) Uani 1 1 d . . . . . 
C2 C 0.93677(15) 0.59763(11) 0.28308(9) 0.0181(3) Uani 1 1 d . . . . . 
C3 C 0.83126(14) 0.59276(11) 0.29183(9) 0.0162(3) Uani 1 1 d . . . . . 
C11 C 0.58596(16) 0.41936(12) 0.33874(10) 0.0222(3) Uani 1 1 d . . . . . 
C12 C 0.6877(2) 0.41452(15) 0.40716(13) 0.0418(6) Uani 1 1 d . . . . . 
H12A H 0.6755 0.4543 0.4444 0.063 Uiso 1 1 calc R U . . . 
H12B H 0.7556 0.4338 0.3959 0.063 Uiso 1 1 calc R U . . . 
H12C H 0.6976 0.3524 0.4253 0.063 Uiso 1 1 calc R U . . . 
C13 C 0.4782(2) 0.39675(14) 0.35589(13) 0.0346(5) Uani 1 1 d . . . . . 
H13A H 0.4136 0.4003 0.3113 0.052 Uiso 1 1 calc R U . . . 
H13B H 0.4677 0.4398 0.3916 0.052 Uiso 1 1 calc R U . . . 
H13C H 0.4837 0.3356 0.3758 0.052 Uiso 1 1 calc R U . . . 
C14 C 0.60214(18) 0.35304(13) 0.28289(12) 0.0285(4) Uani 1 1 d . . . . . 
H14A H 0.5380 0.3574 0.2381 0.043 Uiso 1 1 calc R U . . . 
H14B H 0.6067 0.2916 0.3023 0.043 Uiso 1 1 calc R U . . . 
H14C H 0.6721 0.3674 0.2723 0.043 Uiso 1 1 calc R U . . . 
C21 C 0.63654(16) 0.76226(12) 0.27158(11) 0.0235(4) Uani 1 1 d . . . . . 
H21A H 0.7194 0.7538 0.2855 0.028 Uiso 1 1 calc R U . . . 
H21B H 0.6201 0.7998 0.3093 0.028 Uiso 1 1 calc R U . . . 
C22 C 0.59559(18) 0.81035(14) 0.19910(12) 0.0309(4) Uani 1 1 d . . . . . 
H22A H 0.6291 0.8715 0.2042 0.037 Uiso 1 1 calc R U . . . 
H22B H 0.6215 0.7770 0.1630 0.037 Uiso 1 1 calc R U . . . 
C23 C 0.4682(2) 0.81803(15) 0.17178(13) 0.0363(5) Uani 1 1 d . . . . . 
H23A H 0.4440 0.8424 0.1217 0.044 Uiso 1 1 calc R U . . . 
H23B H 0.4429 0.8603 0.2031 0.044 Uiso 1 1 calc R U . . . 
C24 C 0.41402(17) 0.72612(15) 0.17236(11) 0.0289(4) Uani 1 1 d . . . . . 
H24A H 0.3309 0.7329 0.1583 0.035 Uiso 1 1 calc R U . . . 
H24B H 0.4315 0.6862 0.1364 0.035 Uiso 1 1 calc R U . . . 
C25 C 0.45736(15) 0.68412(13) 0.24688(10) 0.0229(4) Uani 1 1 d . . . . . 
H25A H 0.4372 0.7228 0.2826 0.027 Uiso 1 1 calc R U . . . 
H25B H 0.4217 0.6244 0.2465 0.027 Uiso 1 1 calc R U . . . 
C31 C 0.54104(16) 0.63199(13) 0.43036(10) 0.0242(4) Uani 1 1 d . . . . . 
H31A H 0.5431 0.5927 0.4721 0.029 Uiso 1 1 calc R U . . . 
H31B H 0.4776 0.6119 0.3880 0.029 Uiso 1 1 calc R U . . . 
C32 C 0.52067(18) 0.72903(15) 0.44868(12) 0.0310(4) Uani 1 1 d . . . . . 
H32A H 0.5051 0.7665 0.4044 0.037 Uiso 1 1 calc R U . . . 
H32B H 0.4534 0.7314 0.4654 0.037 Uiso 1 1 calc R U . . . 
C33 C 0.62195(19) 0.76733(15) 0.50749(12) 0.0323(4) Uani 1 1 d . . . . . 
H33A H 0.6102 0.8325 0.5134 0.039 Uiso 1 1 calc R U . . . 
H33B H 0.6292 0.7371 0.5543 0.039 Uiso 1 1 calc R U . . . 
C34 C 0.72949(18) 0.75374(14) 0.48803(10) 0.0270(4) Uani 1 1 d . . . . . 
H34A H 0.7263 0.7902 0.4446 0.032 Uiso 1 1 calc R U . . . 
H34B H 0.7951 0.7744 0.5287 0.032 Uiso 1 1 calc R U . . . 
C35 C 0.74421(16) 0.65528(14) 0.47263(10) 0.0242(4) Uani 1 1 d . . . . . 
H35A H 0.8138 0.6476 0.4589 0.029 Uiso 1 1 calc R U . . . 
H35B H 0.7525 0.6193 0.5171 0.029 Uiso 1 1 calc R U . . . 
C41 C 0.66997(15) 0.54344(14) 0.12910(9) 0.0231(4) Uani 1 1 d . . . . . 
H41A H 0.6413 0.5571 0.1707 0.028 Uiso 1 1 calc R U . . . 
C42 C 0.6092(2) 0.60545(16) 0.06693(11) 0.0352(5) Uani 1 1 d . . . . . 
H42A H 0.6296 0.6682 0.0810 0.053 Uiso 1 1 calc R U . . . 
H42B H 0.5274 0.5978 0.0556 0.053 Uiso 1 1 calc R U . . . 
H42C H 0.6313 0.5905 0.0240 0.053 Uiso 1 1 calc R U . . . 
C43 C 0.64296(18) 0.44546(15) 0.10841(12) 0.0309(4) Uani 1 1 d . . . . . 
H43A H 0.6848 0.4066 0.1488 0.046 Uiso 1 1 calc R U . . . 
H43B H 0.6650 0.4312 0.0653 0.046 Uiso 1 1 calc R U . . . 
H43C H 0.5617 0.4352 0.0977 0.046 Uiso 1 1 calc R U . . . 
C44 C 0.85644(17) 0.55007(13) 0.10162(10) 0.0228(4) Uani 1 1 d . . . . . 
H44A H 0.8003 0.5335 0.0539 0.027 Uiso 1 1 calc R U . . . 
C45 C 0.94150(19) 0.47370(14) 0.12233(13) 0.0321(4) Uani 1 1 d . . . . . 
H45A H 0.9014 0.4162 0.1186 0.048 Uiso 1 1 calc R U . . . 
H45B H 0.9908 0.4823 0.1724 0.048 Uiso 1 1 calc R U . . . 
H45C H 0.9872 0.4733 0.0894 0.048 Uiso 1 1 calc R U . . . 
C46 C 0.9087(2) 0.63887(14) 0.09039(12) 0.0327(5) Uani 1 1 d . . . . . 
H46A H 0.8494 0.6847 0.0743 0.049 Uiso 1 1 calc R U . . . 
H46B H 0.9466 0.6314 0.0534 0.049 Uiso 1 1 calc R U . . . 
H46C H 0.9639 0.6580 0.1362 0.049 Uiso 1 1 calc R U . . . 
C51 C 1.13087(16) 0.61036(14) 0.27834(12) 0.0273(4) Uani 1 1 d . . . . . 
H51A H 1.0919 0.5917 0.2270 0.033 Uiso 1 1 calc R U . . . 
C52 C 1.1811(2) 0.70303(16) 0.27635(15) 0.0398(5) Uani 1 1 d . . . . . 
H52A H 1.1202 0.7466 0.2564 0.060 Uiso 1 1 calc R U . . . 
H52B H 1.2303 0.7013 0.2456 0.060 Uiso 1 1 calc R U . . . 
H52C H 1.2253 0.7211 0.3257 0.060 Uiso 1 1 calc R U . . . 
C53 C 1.22169(19) 0.54094(16) 0.31169(15) 0.0380(5) Uani 1 1 d . . . . . 
H53A H 1.1865 0.4819 0.3121 0.057 Uiso 1 1 calc R U . . . 
H53B H 1.2636 0.5587 0.3616 0.057 Uiso 1 1 calc R U . . . 
H53C H 1.2737 0.5373 0.2829 0.057 Uiso 1 1 calc R U . . . 
C54 C 1.07958(16) 0.63768(14) 0.39386(10) 0.0254(4) Uani 1 1 d . . . . . 
H54A H 1.1635 0.6455 0.4108 0.030 Uiso 1 1 calc R U . . . 
C55 C 1.0278(2) 0.72693(15) 0.40497(12) 0.0340(5) Uani 1 1 d . . . . . 
H55A H 1.0527 0.7744 0.3783 0.051 Uiso 1 1 calc R U . . . 
H55B H 1.0519 0.7417 0.4569 0.051 Uiso 1 1 calc R U . . . 
H55C H 0.9452 0.7223 0.3869 0.051 Uiso 1 1 calc R U . . . 
C56 C 1.05189(18) 0.56258(16) 0.43862(11) 0.0325(4) Uani 1 1 d . . . . . 
H56A H 1.0892 0.5069 0.4313 0.049 Uiso 1 1 calc R U . . . 
H56B H 0.9699 0.5532 0.4233 0.049 Uiso 1 1 calc R U . . . 
H56C H 1.0787 0.5791 0.4902 0.049 Uiso 1 1 calc R U . . . 
H1 H 0.530(2) 0.5105(16) 0.2621(13) 0.021(5) Uiso 1 1 d . . . . . 
  
loop_ 
 _atom_site_aniso_label 
 _atom_site_aniso_U_11 
 _atom_site_aniso_U_22 
 _atom_site_aniso_U_33 
 _atom_site_aniso_U_23 
 _atom_site_aniso_U_13 
 _atom_site_aniso_U_12 
P1 0.01200(19) 0.01470(19) 0.01744(19) -0.00108(14) 0.00437(14) -0.00085(14) 
N1 0.0220(8) 0.0146(7) 0.0207(7) 0.0014(5) -0.0002(6) -0.0042(5) 
N2 0.0126(7) 0.0152(6) 0.0230(7) 0.0015(5) 0.0036(5) -0.0010(5) 
N3 0.0159(7) 0.0242(7) 0.0210(7) -0.0052(5) 0.0081(5) -0.0029(6) 
N4 0.0182(7) 0.0299(8) 0.0190(7) -0.0025(6) 0.0069(6) -0.0022(6) 
N5 0.0134(7) 0.0333(9) 0.0247(7) -0.0022(6) 0.0060(6) -0.0030(6) 
N6 0.0126(6) 0.0262(7) 0.0187(6) -0.0008(5) 0.0045(5) 0.0010(5) 
B1 0.0328(13) 0.0412(14) 0.0289(11) -0.0055(10) 0.0043(9) -0.0040(10) 
F1 0.1102(18) 0.0624(13) 0.0691(13) -0.0115(10) 0.0031(12) -0.0428(12) 
F2 0.0671(13) 0.1023(17) 0.0965(16) -0.0151(13) 0.0509(12) 0.0074(12) 
F3 0.0734(13) 0.0718(13) 0.0627(11) -0.0204(10) -0.0366(10) 0.0207(10) 
F4 0.1145(17) 0.0604(11) 0.0439(9) -0.0048(8) 0.0345(10) -0.0125(11) 
C1 0.0161(8) 0.0172(7) 0.0205(7) 0.0007(6) 0.0063(6) 0.0007(6) 
C2 0.0175(8) 0.0170(7) 0.0207(7) 0.0007(6) 0.0070(6) 0.0011(6) 
C3 0.0136(7) 0.0150(7) 0.0189(7) 0.0001(5) 0.0035(6) 0.0007(6) 
C11 0.0257(9) 0.0150(8) 0.0246(8) 0.0016(6) 0.0060(7) -0.0013(6) 
C12 0.0518(15) 0.0224(10) 0.0354(11) 0.0073(8) -0.0090(10) -0.0011(9) 
C13 0.0455(13) 0.0215(9) 0.0471(12) 0.0055(8) 0.0294(11) 0.0024(9) 
C14 0.0315(11) 0.0193(9) 0.0382(10) -0.0012(7) 0.0159(8) 0.0016(7) 
C21 0.0224(9) 0.0159(8) 0.0305(9) 0.0006(6) 0.0059(7) -0.0031(6) 
C22 0.0319(11) 0.0234(9) 0.0367(10) 0.0094(8) 0.0096(8) -0.0022(8) 
C23 0.0332(12) 0.0296(11) 0.0423(12) 0.0154(9) 0.0063(9) 0.0068(9) 
C24 0.0211(9) 0.0347(11) 0.0275(9) 0.0082(8) 0.0028(7) 0.0028(8) 
C25 0.0147(8) 0.0258(9) 0.0276(9) 0.0032(7) 0.0059(7) 0.0020(6) 
C31 0.0220(9) 0.0271(9) 0.0283(9) -0.0050(7) 0.0148(7) -0.0060(7) 
C32 0.0263(10) 0.0328(11) 0.0379(11) -0.0099(8) 0.0158(8) 0.0000(8) 
C33 0.0377(12) 0.0289(10) 0.0344(10) -0.0118(8) 0.0172(9) -0.0052(9) 
C34 0.0290(10) 0.0292(10) 0.0231(8) -0.0073(7) 0.0085(7) -0.0097(8) 
C35 0.0204(9) 0.0324(10) 0.0187(7) -0.0042(7) 0.0045(6) -0.0016(7) 
C41 0.0174(8) 0.0324(10) 0.0180(7) -0.0030(7) 0.0033(6) 0.0014(7) 
C42 0.0360(12) 0.0369(12) 0.0273(9) -0.0017(8) 0.0021(8) 0.0135(9) 
C43 0.0261(10) 0.0316(10) 0.0335(10) -0.0003(8) 0.0070(8) -0.0064(8) 
C44 0.0278(10) 0.0221(8) 0.0223(8) -0.0022(6) 0.0132(7) -0.0038(7) 
C45 0.0354(11) 0.0214(9) 0.0460(12) -0.0038(8) 0.0222(10) -0.0005(8) 
C46 0.0447(13) 0.0227(9) 0.0359(11) 0.0017(8) 0.0201(9) -0.0064(9) 
C51 0.0153(8) 0.0339(10) 0.0356(10) 0.0014(8) 0.0121(7) 0.0000(7) 
C52 0.0268(11) 0.0355(12) 0.0629(15) 0.0144(11) 0.0225(11) 0.0029(9) 
C53 0.0242(11) 0.0322(11) 0.0631(15) 0.0057(10) 0.0215(10) 0.0046(8) 
C54 0.0161(8) 0.0321(10) 0.0241(8) -0.0013(7) 0.0006(7) -0.0043(7) 
C55 0.0379(12) 0.0281(10) 0.0335(10) -0.0077(8) 0.0074(9) -0.0053(9) 
C56 0.0256(10) 0.0386(12) 0.0277(9) 0.0078(8) 0.0006(8) 0.0011(8) 
  
_geom_special_details 
; 
 All esds (except the esd in the dihedral angle between two l.s. planes) 
 are estimated using the full covariance matrix.  The cell esds are taken 
 into account individually in the estimation of esds in distances, angles 
 and torsion angles; correlations between esds in cell parameters are only 
 used when they are defined by crystal symmetry.  An approximate (isotropic) 
 treatment of cell esds is used for estimating esds involving l.s. planes. 
; 
  
loop_ 
 _geom_bond_atom_site_label_1 
 _geom_bond_atom_site_label_2 
 _geom_bond_distance 
 _geom_bond_site_symmetry_2 
 _geom_bond_publ_flag 
P1 N6 1.5794(15) . ? 
P1 N1 1.6223(15) . ? 
P1 N3 1.6367(15) . ? 
P1 N2 1.6575(15) . ? 
N1 C11 1.484(2) . ? 
N1 H1 0.83(2) . ? 
N2 C21 1.473(2) . ? 
N2 C25 1.475(2) . ? 
N3 C31 1.460(2) . ? 
N3 C35 1.464(2) . ? 
N4 C1 1.323(2) . ? 
N4 C44 1.474(2) . ? 
N4 C41 1.475(2) . ? 
N5 C2 1.324(2) . ? 
N5 C51 1.470(2) . ? 
N5 C54 1.476(2) . ? 
N6 C3 1.315(2) . ? 
B1 F3 1.358(3) . ? 
B1 F1 1.362(3) . ? 
B1 F2 1.375(3) . ? 
B1 F4 1.376(3) . ? 
C1 C3 1.392(2) . ? 
C1 C2 1.397(2) . ? 
C2 C3 1.379(2) . ? 
C11 C13 1.518(3) . ? 
C11 C14 1.522(3) . ? 
C11 C12 1.522(3) . ? 
C12 H12A 0.9800 . ? 
C12 H12B 0.9800 . ? 
C12 H12C 0.9800 . ? 
C13 H13A 0.9800 . ? 
C13 H13B 0.9800 . ? 
C13 H13C 0.9800 . ? 
C14 H14A 0.9800 . ? 
C14 H14B 0.9800 . ? 
C14 H14C 0.9800 . ? 
C21 C22 1.514(3) . ? 
C21 H21A 0.9900 . ? 
C21 H21B 0.9900 . ? 
C22 C23 1.512(3) . ? 
C22 H22A 0.9900 . ? 
C22 H22B 0.9900 . ? 
C23 C24 1.523(3) . ? 
C23 H23A 0.9900 . ? 
C23 H23B 0.9900 . ? 
C24 C25 1.508(3) . ? 
C24 H24A 0.9900 . ? 
C24 H24B 0.9900 . ? 
C25 H25A 0.9900 . ? 
C25 H25B 0.9900 . ? 
C31 C32 1.523(3) . ? 
C31 H31A 0.9900 . ? 
C31 H31B 0.9900 . ? 
C32 C33 1.521(3) . ? 
C32 H32A 0.9900 . ? 
C32 H32B 0.9900 . ? 
C33 C34 1.515(3) . ? 
C33 H33A 0.9900 . ? 
C33 H33B 0.9900 . ? 
C34 C35 1.513(3) . ? 
C34 H34A 0.9900 . ? 
C34 H34B 0.9900 . ? 
C35 H35A 0.9900 . ? 
C35 H35B 0.9900 . ? 
C41 C42 1.516(3) . ? 
C41 C43 1.517(3) . ? 
C41 H41A 1.0000 . ? 
C42 H42A 0.9800 . ? 
C42 H42B 0.9800 . ? 
C42 H42C 0.9800 . ? 
C43 H43A 0.9800 . ? 
C43 H43B 0.9800 . ? 
C43 H43C 0.9800 . ? 
C44 C46 1.515(3) . ? 
C44 C45 1.517(3) . ? 
C44 H44A 1.0000 . ? 
C45 H45A 0.9800 . ? 
C45 H45B 0.9800 . ? 
C45 H45C 0.9800 . ? 
C46 H46A 0.9800 . ? 
C46 H46B 0.9800 . ? 
C46 H46C 0.9800 . ? 
C51 C52 1.516(3) . ? 
C51 C53 1.517(3) . ? 
C51 H51A 1.0000 . ? 
C52 H52A 0.9800 . ? 
C52 H52B 0.9800 . ? 
C52 H52C 0.9800 . ? 
C53 H53A 0.9800 . ? 
C53 H53B 0.9800 . ? 
C53 H53C 0.9800 . ? 
C54 C56 1.516(3) . ? 
C54 C55 1.517(3) . ? 
C54 H54A 1.0000 . ? 
C55 H55A 0.9800 . ? 
C55 H55B 0.9800 . ? 
C55 H55C 0.9800 . ? 
C56 H56A 0.9800 . ? 
C56 H56B 0.9800 . ? 
C56 H56C 0.9800 . ? 
  
loop_ 
 _geom_angle_atom_site_label_1 
 _geom_angle_atom_site_label_2 
 _geom_angle_atom_site_label_3 
 _geom_angle 
 _geom_angle_site_symmetry_1 
 _geom_angle_site_symmetry_3 
 _geom_angle_publ_flag 
N6 P1 N1 120.50(8) . . ? 
N6 P1 N3 102.15(8) . . ? 
N1 P1 N3 107.06(8) . . ? 
N6 P1 N2 110.67(8) . . ? 
N1 P1 N2 101.64(8) . . ? 
N3 P1 N2 115.45(8) . . ? 
C11 N1 P1 129.36(13) . . ? 
C11 N1 H1 113.4(16) . . ? 
P1 N1 H1 115.7(16) . . ? 
C21 N2 C25 110.77(14) . . ? 
C21 N2 P1 115.63(12) . . ? 
C25 N2 P1 121.01(12) . . ? 
C31 N3 C35 112.36(14) . . ? 
C31 N3 P1 121.51(12) . . ? 
C35 N3 P1 124.64(12) . . ? 
C1 N4 C44 122.74(16) . . ? 
C1 N4 C41 117.97(15) . . ? 
C44 N4 C41 119.19(14) . . ? 
C2 N5 C51 123.00(16) . . ? 
C2 N5 C54 117.38(15) . . ? 
C51 N5 C54 119.53(15) . . ? 
C3 N6 P1 129.82(13) . . ? 
F3 B1 F1 111.0(2) . . ? 
F3 B1 F2 108.7(2) . . ? 
F1 B1 F2 114.3(3) . . ? 
F3 B1 F4 108.2(2) . . ? 
F1 B1 F4 107.8(2) . . ? 
F2 B1 F4 106.7(2) . . ? 
N4 C1 C3 148.13(17) . . ? 
N4 C1 C2 152.57(17) . . ? 
C3 C1 C2 59.29(12) . . ? 
N5 C2 C3 145.03(17) . . ? 
N5 C2 C1 154.83(17) . . ? 
C3 C2 C1 60.14(12) . . ? 
N6 C3 C2 142.42(16) . . ? 
N6 C3 C1 157.00(17) . . ? 
C2 C3 C1 60.57(12) . . ? 
N1 C11 C13 108.43(16) . . ? 
N1 C11 C14 106.87(15) . . ? 
C13 C11 C14 109.65(16) . . ? 
N1 C11 C12 112.03(16) . . ? 
C13 C11 C12 110.59(19) . . ? 
C14 C11 C12 109.20(18) . . ? 
C11 C12 H12A 109.5 . . ? 
C11 C12 H12B 109.5 . . ? 
H12A C12 H12B 109.5 . . ? 
C11 C12 H12C 109.5 . . ? 
H12A C12 H12C 109.5 . . ? 
H12B C12 H12C 109.5 . . ? 
C11 C13 H13A 109.5 . . ? 
C11 C13 H13B 109.5 . . ? 
H13A C13 H13B 109.5 . . ? 
C11 C13 H13C 109.5 . . ? 
H13A C13 H13C 109.5 . . ? 
H13B C13 H13C 109.5 . . ? 
C11 C14 H14A 109.5 . . ? 
C11 C14 H14B 109.5 . . ? 
H14A C14 H14B 109.5 . . ? 
C11 C14 H14C 109.5 . . ? 
H14A C14 H14C 109.5 . . ? 
H14B C14 H14C 109.5 . . ? 
N2 C21 C22 111.11(15) . . ? 
N2 C21 H21A 109.4 . . ? 
C22 C21 H21A 109.4 . . ? 
N2 C21 H21B 109.4 . . ? 
C22 C21 H21B 109.4 . . ? 
H21A C21 H21B 108.0 . . ? 
C23 C22 C21 111.83(18) . . ? 
C23 C22 H22A 109.2 . . ? 
C21 C22 H22A 109.2 . . ? 
C23 C22 H22B 109.2 . . ? 
C21 C22 H22B 109.2 . . ? 
H22A C22 H22B 107.9 . . ? 
C22 C23 C24 110.44(17) . . ? 
C22 C23 H23A 109.6 . . ? 
C24 C23 H23A 109.6 . . ? 
C22 C23 H23B 109.6 . . ? 
C24 C23 H23B 109.6 . . ? 
H23A C23 H23B 108.1 . . ? 
C25 C24 C23 110.49(17) . . ? 
C25 C24 H24A 109.6 . . ? 
C23 C24 H24A 109.6 . . ? 
C25 C24 H24B 109.6 . . ? 
C23 C24 H24B 109.6 . . ? 
H24A C24 H24B 108.1 . . ? 
N2 C25 C24 109.80(15) . . ? 
N2 C25 H25A 109.7 . . ? 
C24 C25 H25A 109.7 . . ? 
N2 C25 H25B 109.7 . . ? 
C24 C25 H25B 109.7 . . ? 
H25A C25 H25B 108.2 . . ? 
N3 C31 C32 111.79(16) . . ? 
N3 C31 H31A 109.3 . . ? 
C32 C31 H31A 109.3 . . ? 
N3 C31 H31B 109.3 . . ? 
C32 C31 H31B 109.3 . . ? 
H31A C31 H31B 107.9 . . ? 
C33 C32 C31 111.59(18) . . ? 
C33 C32 H32A 109.3 . . ? 
C31 C32 H32A 109.3 . . ? 
C33 C32 H32B 109.3 . . ? 
C31 C32 H32B 109.3 . . ? 
H32A C32 H32B 108.0 . . ? 
C34 C33 C32 110.80(16) . . ? 
C34 C33 H33A 109.5 . . ? 
C32 C33 H33A 109.5 . . ? 
C34 C33 H33B 109.5 . . ? 
C32 C33 H33B 109.5 . . ? 
H33A C33 H33B 108.1 . . ? 
C35 C34 C33 110.42(17) . . ? 
C35 C34 H34A 109.6 . . ? 
C33 C34 H34A 109.6 . . ? 
C35 C34 H34B 109.6 . . ? 
C33 C34 H34B 109.6 . . ? 
H34A C34 H34B 108.1 . . ? 
N3 C35 C34 110.64(16) . . ? 
N3 C35 H35A 109.5 . . ? 
C34 C35 H35A 109.5 . . ? 
N3 C35 H35B 109.5 . . ? 
C34 C35 H35B 109.5 . . ? 
H35A C35 H35B 108.1 . . ? 
N4 C41 C42 111.64(17) . . ? 
N4 C41 C43 111.37(16) . . ? 
C42 C41 C43 110.91(16) . . ? 
N4 C41 H41A 107.6 . . ? 
C42 C41 H41A 107.6 . . ? 
C43 C41 H41A 107.6 . . ? 
C41 C42 H42A 109.5 . . ? 
C41 C42 H42B 109.5 . . ? 
H42A C42 H42B 109.5 . . ? 
C41 C42 H42C 109.5 . . ? 
H42A C42 H42C 109.5 . . ? 
H42B C42 H42C 109.5 . . ? 
C41 C43 H43A 109.5 . . ? 
C41 C43 H43B 109.5 . . ? 
H43A C43 H43B 109.5 . . ? 
C41 C43 H43C 109.5 . . ? 
H43A C43 H43C 109.5 . . ? 
H43B C43 H43C 109.5 . . ? 
N4 C44 C46 111.22(16) . . ? 
N4 C44 C45 111.83(16) . . ? 
C46 C44 C45 113.02(17) . . ? 
N4 C44 H44A 106.8 . . ? 
C46 C44 H44A 106.8 . . ? 
C45 C44 H44A 106.8 . . ? 
C44 C45 H45A 109.5 . . ? 
C44 C45 H45B 109.5 . . ? 
H45A C45 H45B 109.5 . . ? 
C44 C45 H45C 109.5 . . ? 
H45A C45 H45C 109.5 . . ? 
H45B C45 H45C 109.5 . . ? 
C44 C46 H46A 109.5 . . ? 
C44 C46 H46B 109.5 . . ? 
H46A C46 H46B 109.5 . . ? 
C44 C46 H46C 109.5 . . ? 
H46A C46 H46C 109.5 . . ? 
H46B C46 H46C 109.5 . . ? 
N5 C51 C52 111.16(18) . . ? 
N5 C51 C53 111.28(17) . . ? 
C52 C51 C53 111.56(17) . . ? 
N5 C51 H51A 107.5 . . ? 
C52 C51 H51A 107.5 . . ? 
C53 C51 H51A 107.5 . . ? 
C51 C52 H52A 109.5 . . ? 
C51 C52 H52B 109.5 . . ? 
H52A C52 H52B 109.5 . . ? 
C51 C52 H52C 109.5 . . ? 
H52A C52 H52C 109.5 . . ? 
H52B C52 H52C 109.5 . . ? 
C51 C53 H53A 109.5 . . ? 
C51 C53 H53B 109.5 . . ? 
H53A C53 H53B 109.5 . . ? 
C51 C53 H53C 109.5 . . ? 
H53A C53 H53C 109.5 . . ? 
H53B C53 H53C 109.5 . . ? 
N5 C54 C56 110.70(17) . . ? 
N5 C54 C55 111.40(16) . . ? 
C56 C54 C55 112.12(18) . . ? 
N5 C54 H54A 107.5 . . ? 
C56 C54 H54A 107.5 . . ? 
C55 C54 H54A 107.5 . . ? 
C54 C55 H55A 109.5 . . ? 
C54 C55 H55B 109.5 . . ? 
H55A C55 H55B 109.5 . . ? 
C54 C55 H55C 109.5 . . ? 
H55A C55 H55C 109.5 . . ? 
H55B C55 H55C 109.5 . . ? 
C54 C56 H56A 109.5 . . ? 
C54 C56 H56B 109.5 . . ? 
H56A C56 H56B 109.5 . . ? 
C54 C56 H56C 109.5 . . ? 
H56A C56 H56C 109.5 . . ? 
H56B C56 H56C 109.5 . . ? 
  
loop_ 
 _geom_hbond_atom_site_label_D 
 _geom_hbond_atom_site_label_H 
 _geom_hbond_atom_site_label_A 
 _geom_hbond_distance_DH 
 _geom_hbond_distance_HA 
 _geom_hbond_distance_DA 
 _geom_hbond_angle_DHA 
 _geom_hbond_site_symmetry_A 
N1 H1 F3  0.83(2) 2.11(2) 2.899(2) 159(2) . 
  
_refine_diff_density_max    1.038 
_refine_diff_density_min   -0.483 
_refine_diff_density_rms    0.071 
  
_shelx_res_file 
; 
  
    phosphinimine.res created by SHELXL-2014/7 
  
  
TITL [C29H58N6P][BF4] in P2(1)/n   
CELL  0.71073  12.4622  14.8319  19.3726   90.000  108.269   90.000 
ZERR    4.000   0.0019   0.0022   0.0029    0.000    0.002    0.000 
LATT  1 
SYMM 1/2-X, 1/2+Y, 1/2-Z 
SFAC C H B N F P 
UNIT 116 232 4 24 16 4 
TEMP -143.180 
SIZE .82 .44 .11 
  
L.S. 10 
BOND $H 
FMAP 2 
PLAN 20 
 
  
ACTA 50 
WPDB -1 
  
HTAB N1 F3 
  
 
WGHT    0.055300    4.063300 
FVAR       0.34527 
P1    6    0.648277    0.600182    0.331223    11.00000    0.01200    0.01470 = 
         0.01744   -0.00108    0.00437   -0.00085 
N1    4    0.572913    0.510019    0.304694    11.00000    0.02196    0.01458 = 
         0.02071    0.00137   -0.00024   -0.00416 
N2    4    0.581204    0.673853    0.268101    11.00000    0.01261    0.01515 = 
         0.02302    0.00152    0.00361   -0.00102 
N3    4    0.646851    0.622465    0.413678    11.00000    0.01594    0.02418 = 
         0.02100   -0.00518    0.00813   -0.00289 
N4    4    0.792905    0.559691    0.153853    11.00000    0.01816    0.02990 = 
         0.01902   -0.00248    0.00691   -0.00221 
N5    4    1.045553    0.612640    0.316237    11.00000    0.01342    0.03333 = 
         0.02472   -0.00221    0.00603   -0.00298 
N6    4    0.778934    0.599792    0.340946    11.00000    0.01259    0.02621 = 
         0.01868   -0.00078    0.00452    0.00105 
B1    3    0.293426    0.490401    0.116769    11.00000    0.03284    0.04124 = 
         0.02886   -0.00550    0.00429   -0.00398 
F1    5    0.243680    0.410727    0.089407    11.00000    0.11022    0.06240 = 
         0.06912   -0.01145    0.00312   -0.04278 
F2    5    0.226723    0.546185    0.142774    11.00000    0.06708    0.10232 = 
         0.09646   -0.01514    0.05087    0.00742 
F3    5    0.392380    0.476288    0.170500    11.00000    0.07338    0.07179 = 
         0.06266   -0.02041   -0.03664    0.02070 
F4    5    0.316524    0.536242    0.061301    11.00000    0.11448    0.06040 = 
         0.04391   -0.00479    0.03453   -0.01248 
C1    1    0.842328    0.577859    0.223469    11.00000    0.01610    0.01716 = 
         0.02055    0.00074    0.00625    0.00073 
C2    1    0.936773    0.597627    0.283078    11.00000    0.01745    0.01697 = 
         0.02073    0.00066    0.00702    0.00108 
C3    1    0.831262    0.592762    0.291830    11.00000    0.01362    0.01504 = 
         0.01892    0.00007    0.00355    0.00071 
C11   1    0.585962    0.419356    0.338742    11.00000    0.02572    0.01505 = 
         0.02460    0.00158    0.00602   -0.00132 
C12   1    0.687720    0.414523    0.407162    11.00000    0.05179    0.02244 = 
         0.03540    0.00725   -0.00904   -0.00107 
AFIX 137 
H12A  2    0.675482    0.454277    0.444403    11.00000   -1.50000 
H12B  2    0.755560    0.433785    0.395859    11.00000   -1.50000 
H12C  2    0.697640    0.352395    0.425280    11.00000   -1.50000 
AFIX   0 
C13   1    0.478206    0.396754    0.355891    11.00000    0.04551    0.02152 = 
         0.04706    0.00552    0.02940    0.00242 
AFIX 137 
H13A  2    0.413647    0.400296    0.311306    11.00000   -1.50000 
H13B  2    0.467740    0.439803    0.391621    11.00000   -1.50000 
H13C  2    0.483686    0.335578    0.375813    11.00000   -1.50000 
AFIX   0 
C14   1    0.602139    0.353043    0.282891    11.00000    0.03148    0.01932 = 
         0.03820   -0.00124    0.01585    0.00159 
AFIX 137 
H14A  2    0.537999    0.357404    0.238133    11.00000   -1.50000 
H14B  2    0.606694    0.291625    0.302254    11.00000   -1.50000 
H14C  2    0.672142    0.367391    0.272315    11.00000   -1.50000 
AFIX   0 
C21   1    0.636537    0.762263    0.271576    11.00000    0.02244    0.01593 = 
         0.03054    0.00058    0.00592   -0.00313 
AFIX  23 
H21A  2    0.719389    0.753767    0.285507    11.00000   -1.20000 
H21B  2    0.620139    0.799809    0.309317    11.00000   -1.20000 
AFIX   0 
C22   1    0.595589    0.810346    0.199103    11.00000    0.03186    0.02339 = 
         0.03665    0.00937    0.00963   -0.00219 
AFIX  23 
H22A  2    0.629103    0.871466    0.204213    11.00000   -1.20000 
H22B  2    0.621510    0.776960    0.163009    11.00000   -1.20000 
AFIX   0 
C23   1    0.468206    0.818031    0.171782    11.00000    0.03317    0.02962 = 
         0.04229    0.01538    0.00633    0.00683 
AFIX  23 
H23A  2    0.443973    0.842442    0.121695    11.00000   -1.20000 
H23B  2    0.442861    0.860285    0.203076    11.00000   -1.20000 
AFIX   0 
C24   1    0.414017    0.726119    0.172359    11.00000    0.02107    0.03468 = 
         0.02752    0.00824    0.00281    0.00277 
AFIX  23 
H24A  2    0.330919    0.732938    0.158343    11.00000   -1.20000 
H24B  2    0.431540    0.686152    0.136387    11.00000   -1.20000 
AFIX   0 
C25   1    0.457361    0.684124    0.246883    11.00000    0.01471    0.02578 = 
         0.02756    0.00318    0.00586    0.00201 
AFIX  23 
H25A  2    0.437238    0.722780    0.282631    11.00000   -1.20000 
H25B  2    0.421737    0.624388    0.246500    11.00000   -1.20000 
AFIX   0 
C31   1    0.541038    0.631989    0.430361    11.00000    0.02199    0.02705 = 
         0.02829   -0.00499    0.01476   -0.00596 
AFIX  23 
H31A  2    0.543077    0.592689    0.472060    11.00000   -1.20000 
H31B  2    0.477593    0.611867    0.388035    11.00000   -1.20000 
AFIX   0 
C32   1    0.520672    0.729027    0.448685    11.00000    0.02634    0.03278 = 
         0.03791   -0.00989    0.01583    0.00002 
AFIX  23 
H32A  2    0.505127    0.766537    0.404360    11.00000   -1.20000 
H32B  2    0.453382    0.731429    0.465422    11.00000   -1.20000 
AFIX   0 
C33   1    0.621949    0.767334    0.507486    11.00000    0.03767    0.02888 = 
         0.03437   -0.01184    0.01717   -0.00524 
AFIX  23 
H33A  2    0.610188    0.832524    0.513413    11.00000   -1.20000 
H33B  2    0.629232    0.737133    0.554310    11.00000   -1.20000 
AFIX   0 
C34   1    0.729494    0.753736    0.488032    11.00000    0.02903    0.02924 = 
         0.02310   -0.00727    0.00854   -0.00974 
AFIX  23 
H34A  2    0.726262    0.790204    0.444624    11.00000   -1.20000 
H34B  2    0.795114    0.774399    0.528732    11.00000   -1.20000 
AFIX   0 
C35   1    0.744207    0.655275    0.472626    11.00000    0.02036    0.03241 = 
         0.01869   -0.00419    0.00446   -0.00157 
AFIX  23 
H35A  2    0.813806    0.647621    0.458920    11.00000   -1.20000 
H35B  2    0.752472    0.619340    0.517061    11.00000   -1.20000 
AFIX   0 
C41   1    0.669972    0.543442    0.129097    11.00000    0.01745    0.03238 = 
         0.01803   -0.00298    0.00330    0.00143 
AFIX  13 
H41A  2    0.641317    0.557126    0.170736    11.00000   -1.20000 
AFIX   0 
C42   1    0.609174    0.605448    0.066928    11.00000    0.03598    0.03692 = 
         0.02729   -0.00168    0.00208    0.01348 
AFIX 137 
H42A  2    0.629554    0.668154    0.080999    11.00000   -1.50000 
H42B  2    0.527358    0.597770    0.055590    11.00000   -1.50000 
H42C  2    0.631308    0.590503    0.024007    11.00000   -1.50000 
AFIX   0 
C43   1    0.642960    0.445461    0.108406    11.00000    0.02609    0.03155 = 
         0.03347   -0.00031    0.00702   -0.00636 
AFIX 137 
H43A  2    0.684763    0.406641    0.148830    11.00000   -1.50000 
H43B  2    0.664986    0.431220    0.065318    11.00000   -1.50000 
H43C  2    0.561679    0.435225    0.097704    11.00000   -1.50000 
AFIX   0 
C44   1    0.856436    0.550070    0.101615    11.00000    0.02780    0.02209 = 
         0.02234   -0.00218    0.01323   -0.00384 
AFIX  13 
H44A  2    0.800330    0.533460    0.053857    11.00000   -1.20000 
AFIX   0 
C45   1    0.941501    0.473700    0.122325    11.00000    0.03542    0.02137 = 
         0.04596   -0.00376    0.02222   -0.00055 
AFIX 137 
H45A  2    0.901449    0.416150    0.118615    11.00000   -1.50000 
H45B  2    0.990791    0.482340    0.172374    11.00000   -1.50000 
H45C  2    0.987219    0.473272    0.089366    11.00000   -1.50000 
AFIX   0 
C46   1    0.908688    0.638872    0.090388    11.00000    0.04472    0.02266 = 
         0.03594    0.00168    0.02014   -0.00637 
AFIX 137 
H46A  2    0.849388    0.684669    0.074250    11.00000   -1.50000 
H46B  2    0.946556    0.631363    0.053406    11.00000   -1.50000 
H46C  2    0.963921    0.658031    0.136247    11.00000   -1.50000 
AFIX   0 
C51   1    1.130875    0.610358    0.278341    11.00000    0.01530    0.03391 = 
         0.03559    0.00141    0.01211   -0.00003 
AFIX  13 
H51A  2    1.091859    0.591708    0.226968    11.00000   -1.20000 
AFIX   0 
C52   1    1.181096    0.703026    0.276348    11.00000    0.02679    0.03554 = 
         0.06289    0.01435    0.02252    0.00290 
AFIX 137 
H52A  2    1.120155    0.746625    0.256379    11.00000   -1.50000 
H52B  2    1.230343    0.701254    0.245632    11.00000   -1.50000 
H52C  2    1.225259    0.721112    0.325744    11.00000   -1.50000 
AFIX   0 
C53   1    1.221692    0.540939    0.311694    11.00000    0.02419    0.03223 = 
         0.06314    0.00565    0.02147    0.00462 
AFIX 137 
H53A  2    1.186478    0.481949    0.312114    11.00000   -1.50000 
H53B  2    1.263580    0.558708    0.361604    11.00000   -1.50000 
H53C  2    1.273703    0.537302    0.282916    11.00000   -1.50000 
AFIX   0 
C54   1    1.079585    0.637677    0.393860    11.00000    0.01608    0.03208 = 
         0.02406   -0.00128    0.00062   -0.00433 
AFIX  13 
H54A  2    1.163516    0.645504    0.410778    11.00000   -1.20000 
AFIX   0 
C55   1    1.027784    0.726926    0.404972    11.00000    0.03793    0.02806 = 
         0.03346   -0.00771    0.00739   -0.00530 
AFIX 137 
H55A  2    1.052738    0.774445    0.378333    11.00000   -1.50000 
H55B  2    1.051945    0.741714    0.456887    11.00000   -1.50000 
H55C  2    0.945213    0.722260    0.386873    11.00000   -1.50000 
AFIX   0 
C56   1    1.051890    0.562579    0.438615    11.00000    0.02563    0.03862 = 
         0.02768    0.00782    0.00056    0.00107 
AFIX 137 
H56A  2    1.089172    0.506860    0.431282    11.00000   -1.50000 
H56B  2    0.969935    0.553232    0.423309    11.00000   -1.50000 
H56C  2    1.078665    0.579107    0.490182    11.00000   -1.50000 
AFIX   0 
H1    2    0.530349    0.510498    0.262078    11.00000    0.02054 
  
HKLF 4 
  
REM  [C29H58N6P][BF4] in P2(1)/n 
REM R1 =  0.0687 for    8156 Fo > 4sig(Fo)  and  0.0815 for all    9935 data 
REM    385 parameters refined using      0 restraints 
  
END 
  
WGHT      0.0555      4.0597 
  
REM Highest difference peak  1.038,  deepest hole -0.483,  1-sigma level  0.071 
Q1    1   0.7160  0.6013  0.3332  11.00000  0.05    1.04 
Q2    1   0.2571  0.4980  0.1737  11.00000  0.05    0.70 
Q3    1   0.8995  0.6005  0.3054  11.00000  0.05    0.64 
Q4    1   0.6809  0.6042  0.3819  11.00000  0.05    0.58 
Q5    1   0.2470  0.5340  0.0704  11.00000  0.05    0.56 
Q6    1   0.5950  0.6286  0.4216  11.00000  0.05    0.51 
Q7    1   0.6764  0.7586  0.4986  11.00000  0.05    0.50 
Q8    1   0.2678  0.4347  0.1761  11.00000  0.05    0.49 
Q9    1   0.9046  0.5932  0.2379  11.00000  0.05    0.48 
Q10   1   0.4180  0.5166  0.1517  11.00000  0.05    0.48 
Q11   1   0.6116  0.6204  0.3739  11.00000  0.05    0.47 
Q12   1   0.5214  0.6814  0.2549  11.00000  0.05    0.47 
Q13   1   0.7366  0.5599  0.1409  11.00000  0.05    0.47 
Q14   1   0.6035  0.6438  0.2990  11.00000  0.05    0.47 
Q15   1   0.5826  0.5980  0.3281  11.00000  0.05    0.47 
Q16   1   0.6421  0.4160  0.3682  11.00000  0.05    0.44 
Q17   1   0.3709  0.4745  0.1843  11.00000  0.05    0.44 
Q18   1   1.0854  0.6158  0.2978  11.00000  0.05    0.44 
Q19   1   0.5242  0.4074  0.3400  11.00000  0.05    0.43 
Q20   1   0.7976  0.5875  0.2485  11.00000  0.05    0.43 
; 
_shelx_res_checksum      98 
  
_shelx_hkl_file 
; 
   1   0   0    0.10    0.10 
   1   0   0    0.00    0.10 
  -1   0   0    0.10    0.10 
  -2   0   0    0.10    0.30 
   2   0   0    1.00    0.30 
  -2   0   0   -0.10    0.20 
   3   0   0   -0.30    0.20 
  -3   0   0    0.20    0.60 
   3   0   0   -0.50    0.20 
  -3   0   0   -0.80    0.30 
   4   0   0  554.44   21.10 
  -4   0   0  481.55   21.10 
   4   0   0  523.75   21.20 
  -4   0   0  528.35   21.70 
   5   0   0   -0.60    0.30 
  -5   0   0   -0.30    0.60 
  -5   0   0   -0.60    0.30 
   5   0   0   -0.80    0.30 
   6   0   0  194.18    8.40 
  -6   0   0  191.58    9.10 
   6   0   0  199.08    8.20 
   6   0   0  202.68    8.30 
   7   0   0   -0.20    0.30 
   7   0   0   -0.10    0.30 
  -7   0   0   -0.30    0.70 
   7   0   0   -0.40    0.40 
  -8   0   0    9.00    2.60 
   8   0   0   13.70    1.00 
   8   0   0   12.40    1.20 
   8   0   0   14.30    1.20 
  -9   0   0   -1.50    0.80 
   9   0   0   -0.90    0.50 
   9   0   0    0.20    0.40 
  10   0   0  240.48   10.50 
 -10   0   0  228.58   11.90 
  10   0   0  255.97   10.30 
  11   0   0    0.30    0.70 
  11   0   0    0.60    0.50 
  12   0   0    0.90    0.90 
 -12   0   0    2.20    1.50 
 -13   0   0   23.90    4.80 
  14   0   0   54.39    3.60 
  16   0   0   88.19    5.20 
   0  -1   0   -2.60    0.10 
   0  -1   0   -2.00    0.20 
   0  -1   0   -2.30    0.20 
  -1  -1   0  283.67   12.70 
   1  -1   0  303.17   12.60 
  -1  -1   0  336.17   12.80 
   1  -1   0  300.27   12.60 
   1   1   0  310.77   12.60 
  -1   1   0  321.27   12.70 
  -2  -1   0 1328.47   55.79 
   2  -1   0 1369.86   55.89 
  -2  -1   0 1496.85   55.89 
   2  -1   0 1318.37   55.69 
   2   1   0 1315.27   55.69 
  -2   1   0 1430.46   56.09 
   2   1   0 1392.26   55.59 
   3  -1   0  320.27   13.10 
  -3  -1   0  342.47   13.60 
   3  -1   0  316.47   13.10 
  -3  -1   0  294.67   13.20 
   3   1   0  309.57   13.10 
   3   1   0  325.47   13.00 
  -3   1   0  344.67   13.60 
   4  -1   0   13.60    0.80 
   4  -1   0   13.20    0.90 
  -4  -1   0   12.20    1.00 
  -4  -1   0   11.70    1.70 
   4   1   0   14.70    0.90 
  -4   1   0   16.50    2.00 
   4   1   0   13.60    0.80 
  -5  -1   0  268.27   11.20 
   5  -1   0  247.98   10.50 
   5  -1   0  251.17   10.40 
  -5  -1   0  230.48   10.50 
   5   1   0  247.48   10.50 
  -5   1   0  269.97   11.30 
   5   1   0  257.37   10.40 
   6  -1   0  126.69    5.50 
  -6  -1   0  114.79    5.40 
   6  -1   0  128.49    5.40 
  -6  -1   0  120.79    6.30 
   6   1   0  125.09    5.50 
   6   1   0  127.89    5.30 
  -6   1   0  131.09    6.50 
   7  -1   0  428.46   17.60 
  -7  -1   0  409.46   18.40 
  -7  -1   0  402.06   17.50 
   7  -1   0  445.66   17.40 
   7   1   0  446.86   17.40 
   7   1   0  435.06   17.60 
  -7   1   0  404.36   18.40 
   8  -1   0   70.29    3.20 
  -8  -1   0   61.19    4.40 
   8  -1   0   66.59    3.30 
  -8   1   0   61.59    4.60 
   8   1   0   70.49    3.10 
   8   1   0   66.79    3.40 
   8   1   0   68.29    3.30 
  -9  -1   0   17.40    3.00 
   9  -1   0   13.10    1.20 
   9  -1   0   15.40    1.40 
   9   1   0   14.60    1.10 
  -9   1   0   10.20    3.20 
   9   1   0   13.40    1.50 
   9   1   0   13.80    1.40 
 -10  -1   0  102.09    6.50 
  10  -1   0  107.19    5.10 
  10  -1   0  113.39    4.90 
  10   1   0  102.69    5.10 
 -10   1   0  102.09    6.70 
  10   1   0  108.69    4.80 
  11  -1   0   36.20    2.60 
  11  -1   0   43.70    2.30 
 -11  -1   0   40.50    4.40 
  11   1   0   36.40    2.60 
 -11   1   0   39.00    4.80 
 -12  -1   0   31.10    4.30 
  12  -1   0   22.80    1.70 
  12  -1   0   19.80    2.00 
  12   1   0   21.20    2.10 
 -13  -1   0   20.20    4.80 
 -14  -1   0   23.90    5.00 
 -15  -1   0   18.90    5.70 
 -16  -1   0   33.30    6.50 
   0  -2   0 2572.04   95.29 
   0  -2   0 2141.19   94.49 
   0  -2   0 2320.77   94.39 
   0  -2   0 2333.07   95.09 
   1  -2   0  953.00   40.50 
  -1  -2   0 1042.50   40.70 
   1  -2   0  974.50   40.70 
   1  -2   0 1039.50   41.00 
   1  -2   0  991.40   40.60 
   1   2   0 1030.70   40.70 
  -2  -2   0 2050.89   82.29 
   2  -2   0 1933.21   81.99 
   2  -2   0 1946.81   81.69 
  -2  -2   0 2150.78   82.49 
  -2   2   0 2084.69   82.29 
   2   2   0 1983.70   81.89 
  -3  -2   0   97.69    4.60 
  -3  -2   0  110.89    4.90 
   3  -2   0  103.09    4.40 
   3  -2   0  101.39    4.40 
  -3   2   0  111.39    5.00 
   3   2   0  102.99    4.20 
   3   2   0   99.59    4.40 
   4  -2   0   12.90    0.90 
  -4  -2   0   11.70    1.50 
   4  -2   0   13.30    0.80 
  -4  -2   0   10.90    1.20 
   4   2   0   12.20    0.90 
  -4   2   0   16.40    2.10 
   4   2   0   13.00    0.70 
  -5  -2   0   99.99    4.60 
  -5  -2   0  101.99    5.20 
   5  -2   0  104.09    4.40 
   5  -2   0   99.59    4.50 
  -5   2   0  105.49    5.40 
   5   2   0  106.19    4.30 
   5   2   0   99.99    4.50 
   6  -2   0   17.80    1.20 
   6  -2   0   19.80    1.30 
  -6  -2   0   15.00    2.10 
  -6  -2   0   17.30    1.50 
   6   2   0   19.50    1.00 
  -6   2   0   19.10    2.80 
   6   2   0   18.10    1.30 
  -7  -2   0    7.10    1.30 
   7  -2   0   10.00    1.10 
  -7  -2   0    8.40    2.00 
   7  -2   0    8.00    0.90 
  -7   2   0    9.40    2.90 
   7   2   0    8.10    0.70 
   7   2   0    8.90    1.00 
   8  -2   0   76.69    3.50 
   8  -2   0   75.69    3.70 
  -8  -2   0   68.69    3.70 
  -8  -2   0   80.19    4.80 
  -8   2   0   73.49    5.20 
   8   2   0   77.69    3.70 
   8   2   0   76.99    3.40 
   9  -2   0  227.88    9.40 
  -9  -2   0  207.38   10.60 
   9  -2   0  225.08    9.50 
  -9   2   0  210.28   10.90 
   9   2   0  222.98    9.70 
   9   2   0  221.28    9.50 
  10  -2   0   17.80    1.70 
  10  -2   0   18.60    1.60 
  10   2   0   17.50    1.70 
 -10   2   0   26.90    4.10 
  11  -2   0   65.69    3.70 
  11  -2   0   71.79    3.50 
 -11  -2   0   66.99    5.40 
 -11   2   0   72.09    5.80 
  11   2   0   65.69    3.70 
  12  -2   0    0.50    0.80 
 -12  -2   0   12.00    4.10 
  12   2   0    1.00    0.90 
 -13  -2   0    2.50    1.90 
  14  -2   0   55.79    3.80 
 -14  -2   0   75.49    6.90 
 -14   2   0   56.79    3.70 
  14   2   0   60.59    3.80 
 -15  -2   0   90.09    8.00 
  15  -2   0   80.39    4.80 
  15   2   0   79.39    4.80 
 -16  -2   0   28.80    6.60 
   0  -3   0   -3.00    0.20 
   0  -3   0   -3.10    0.30 
   0  -3   0   -2.90    0.20 
   0  -3   0   -2.80    0.40 
   1  -3   0   62.29    2.80 
  -1  -3   0   54.09    2.80 
   1  -3   0   54.09    2.50 
  -1  -3   0   61.39    2.90 
   1  -3   0   58.09    2.70 
   1  -3   0   56.59    2.50 
   1   3   0   59.89    2.50 
   2  -3   0   77.59    3.30 
   2  -3   0   68.19    3.40 
  -2  -3   0   80.39    3.80 
  -2  -3   0   73.39    3.60 
   2  -3   0   75.19    3.30 
  -2   3   0   83.89    3.70 
   2   3   0   81.89    3.30 
   3  -3   0  174.48    7.50 
  -3  -3   0  166.88    7.70 
  -3  -3   0  183.88    8.00 
   3  -3   0  181.78    7.50 
   3   3   0  176.58    7.50 
  -3   3   0  195.98    8.00 
   4  -3   0  963.80   39.20 
  -4  -3   0  892.81   39.40 
  -4  -3   0 1023.90   39.80 
   4  -3   0  969.70   39.20 
  -4   3   0 1002.80   39.80 
   4   3   0  957.70   39.20 
  -5  -3   0   46.50    2.20 
   5  -3   0   52.19    2.40 
  -5  -3   0   45.50    2.70 
   5  -3   0   50.09    2.50 
  -5  -3   0   53.99    3.20 
   5   3   0   51.19    2.50 
  -5   3   0   54.29    3.70 
   6  -3   0   64.19    2.90 
  -6  -3   0   61.49    3.80 
   6  -3   0   61.79    3.00 
  -6  -3   0   58.99    2.70 
  -6  -3   0   58.19    3.20 
   6   3   0   63.29    3.00 
  -6   3   0   66.59    4.40 
  -7  -3   0    1.30    0.80 
   7  -3   0    2.00    0.50 
  -7  -3   0    2.60    0.50 
  -7  -3   0    0.80    0.60 
   7  -3   0    1.80    0.60 
   7   3   0    2.30    0.60 
  -7   3   0    1.30    1.00 
  -8  -3   0  112.79    5.60 
  -8  -3   0  117.89    6.60 
   8  -3   0  131.39    5.50 
   8  -3   0  127.19    5.60 
  -8  -3   0  113.69    5.20 
   8   3   0  126.59    5.60 
  -8   3   0  123.69    7.10 
  -9  -3   0    0.30    0.70 
   9  -3   0    0.80    0.60 
   9  -3   0    0.50    0.60 
  -9   3   0    1.40    1.30 
   9   3   0    1.20    0.70 
  10  -3   0    1.50    0.70 
 -10  -3   0    2.00    1.20 
  10  -3   0    2.00    0.70 
 -10   3   0    0.90    1.30 
  10   3   0    2.00    0.80 
  10   3   0    1.70    0.80 
 -11  -3   0   58.39    5.00 
  11  -3   0   56.69    3.10 
  11  -3   0   54.69    3.20 
  11   3   0   57.09    3.30 
 -11   3   0   53.79    5.20 
  12  -3   0   44.20    3.00 
 -12  -3   0   46.70    5.00 
  12  -3   0   45.20    2.80 
 -12   3   0   53.09    5.60 
  12   3   0   42.00    3.00 
  13  -3   0    6.20    1.10 
 -13  -3   0    6.50    2.20 
  13  -3   0    5.70    1.30 
  13   3   0    6.60    1.30 
 -14  -3   0    7.20    2.60 
  14  -3   0    2.70    1.20 
 -14   3   0    3.20    1.20 
 -15  -3   0   20.60    5.90 
 -16  -3   0   35.00    6.30 
   0  -4   0  700.83   28.20 
   0  -4   0  701.13   28.10 
   0  -4   0  700.13   27.80 
   0  -4   0  655.63   27.90 
   1  -4   0  772.22   32.60 
   1  -4   0  765.82   32.50 
  -1  -4   0  770.62   32.90 
  -1  -4   0  772.12   32.50 
  -1  -4   0  897.01   32.90 
   1  -4   0  857.01   32.90 
   1  -4   0  795.02   32.70 
   1   4   0  819.52   32.60 
   2  -4   0   52.19    2.50 
   2  -4   0   52.29    2.70 
   2  -4   0   52.69    2.50 
  -2  -4   0   60.29    2.90 
  -2  -4   0   55.59    3.00 
   2  -4   0   59.69    2.80 
   2   4   0   56.69    2.50 
   3  -4   0   64.69    2.90 
  -3  -4   0   65.59    3.50 
   3  -4   0   66.19    3.00 
   3  -4   0   56.49    2.90 
  -3  -4   0   69.29    3.40 
   3   4   0   67.29    2.90 
  -3   4   0   73.19    3.50 
  -4  -4   0  158.98    7.30 
  -4  -4   0  150.58    6.90 
   4  -4   0  153.38    6.60 
  -4   4   0  162.28    7.20 
   4   4   0  156.28    6.60 
   5  -4   0  535.85   21.90 
   5  -4   0  540.15   22.00 
  -5  -4   0  556.14   22.70 
  -5  -4   0  522.65   22.20 
  -5   4   0  552.24   22.70 
   5   4   0  515.75   21.90 
   6  -4   0    1.90    0.50 
  -6  -4   0    1.70    0.70 
   6  -4   0    1.90    0.50 
  -6  -4   0    0.90    0.70 
  -6   4   0    1.20    1.00 
   6   4   0    1.50    0.50 
   7  -4   0    2.50    0.60 
  -7  -4   0    2.00    0.70 
  -7  -4   0    1.60    0.80 
  -7  -4   0    2.10    0.40 
   7  -4   0    2.40    0.60 
   7   4   0    3.00    0.60 
  -7   4   0    1.80    1.20 
  -8  -4   0    1.80    0.80 
   8  -4   0    3.10    0.70 
  -8  -4   0    2.10    0.90 
  -8  -4   0    3.10    0.60 
   8  -4   0    3.80    0.70 
   8   4   0    3.30    0.70 
  -8   4   0    2.60    1.30 
  -9  -4   0    3.70    0.90 
   9  -4   0    4.70    1.10 
  -9  -4   0    2.50    1.10 
   9  -4   0    5.00    1.10 
   9   4   0    4.00    0.80 
  -9   4   0    2.80    1.40 
  10  -4   0  142.09    6.70 
 -10  -4   0  145.79    8.20 
  10  -4   0  151.28    6.60 
  10   4   0  143.69    6.70 
 -10   4   0  141.89    8.50 
  11  -4   0    1.70    0.80 
  11  -4   0    2.40    0.90 
 -11  -4   0    3.50    1.40 
 -11   4   0    1.20    1.40 
  11   4   0    0.80    0.80 
  12  -4   0    8.10    1.60 
 -12  -4   0    4.70    1.80 
  12  -4   0    5.80    1.20 
  12   4   0    6.10    1.20 
 -12   4   0   11.80    4.30 
  13  -4   0    0.60    0.80 
  13  -4   0    0.50    0.90 
 -13  -4   0    1.50    1.70 
 -14  -4   0   19.80    5.40 
 -15  -4   0   34.90    5.80 
 -16  -4   0   72.89    7.30 
   0  -5   0    0.10    0.40 
   0  -5   0   -0.40    0.20 
   0  -5   0    0.20    0.30 
   0  -5   0   -0.10    0.50 
   1  -5   0    1.10    0.30 
   1  -5   0    0.10    0.30 
   1  -5   0    0.70    0.50 
  -1  -5   0    0.30    0.40 
   1  -5   0    0.50    0.40 
  -1  -5   0    0.50    0.20 
  -1  -5   0    1.10    0.60 
   1   5   0    0.30    0.30 
   2  -5   0   12.60    1.30 
   2  -5   0    8.60    0.80 
   2  -5   0    9.90    1.20 
   2  -5   0   10.40    0.80 
  -2  -5   0   15.10    1.50 
  -2  -5   0   12.60    1.40 
   2   5   0   11.40    0.80 
  -3  -5   0  113.19    5.10 
   3  -5   0  100.69    4.60 
  -3  -5   0  108.39    5.20 
   3  -5   0  103.39    4.60 
   3   5   0  104.99    4.60 
  -3   5   0  111.29    5.20 
   4  -5   0  175.88    8.30 
  -4  -5   0  190.28    8.80 
   4  -5   0  210.08    8.50 
  -4  -5   0  214.18    9.20 
   4  -5   0  197.68    8.40 
   4   5   0  204.68    8.40 
  -4   5   0  215.08    9.10 
   5  -5   0   22.10    1.40 
  -5  -5   0   22.00    2.30 
  -5  -5   0   19.90    1.90 
   5  -5   0   22.70    1.40 
  -5   5   0   23.70    2.60 
   5   5   0   22.40    1.40 
  -6  -5   0   31.70    2.90 
   6  -5   0   33.90    1.90 
   6  -5   0   32.00    1.90 
  -6  -5   0   31.30    2.40 
   6   5   0   32.80    1.90 
  -6   5   0   36.00    3.60 
  -7  -5   0  540.35   22.60 
   7  -5   0  561.64   22.20 
   7  -5   0  537.55   22.30 
  -7  -5   0  523.15   23.20 
   7   5   0  539.45   22.30 
  -7   5   0  536.85   23.50 
   8  -5   0    8.30    1.10 
   8  -5   0    5.80    1.10 
  -8  -5   0    4.40    1.00 
  -8  -5   0    3.60    1.10 
   8   5   0    7.40    1.10 
  -8   5   0    4.50    1.50 
  -9  -5   0    0.30    0.80 
  -9  -5   0    0.40    1.00 
   9  -5   0    0.90    0.70 
   9  -5   0   -0.40    0.60 
   9   5   0    0.80    0.70 
  -9   5   0    1.40    1.40 
  10  -5   0   78.69    4.00 
 -10  -5   0   75.79    4.40 
  10  -5   0   84.49    4.00 
 -10  -5   0   69.89    5.60 
 -10   5   0   71.59    6.10 
  10   5   0   79.19    4.10 
  11  -5   0    5.40    1.10 
 -11  -5   0    8.90    3.50 
  11  -5   0    4.60    1.00 
 -11   5   0    2.90    1.60 
  11   5   0    4.60    1.10 
  12  -5   0    8.40    1.70 
  12  -5   0   11.20    1.70 
 -12  -5   0   16.60    4.20 
  12   5   0    6.20    1.30 
 -12   5   0   14.00    4.20 
  13  -5   0    1.50    1.00 
  13  -5   0    0.60    0.90 
 -13  -5   0    1.50    1.80 
  13   5   0    0.00    0.90 
 -13   5   0    2.40    1.60 
 -14  -5   0   13.30    4.90 
 -15  -5   0   16.60    5.70 
 -16  -5   0   83.59    7.70 
   0  -6   0 2554.34  105.19 
   0  -6   0 2412.96  104.79 
   0  -6   0 2549.94  105.19 
   0  -6   0 2898.21  106.39 
   1  -6   0 1734.63   64.79 
   1  -6   0 1521.65   64.59 
  -1  -6   0 1523.25   64.49 
  -1  -6   0 1695.23   64.99 
   1  -6   0 1505.85   64.59 
   1  -6   0 1667.23   64.99 
  -1  -6   0 1545.55   64.99 
   1   6   0 1617.74   64.59 
   2  -6   0  601.44   25.20 
   2  -6   0  594.04   25.30 
  -2  -6   0  614.04   25.70 
   2  -6   0  590.84   25.10 
   2  -6   0  668.63   25.60 
  -2  -6   0  637.34   25.60 
   2   6   0  626.24   25.20 
   3  -6   0    8.90    0.90 
  -3  -6   0    7.40    1.60 
   3  -6   0    9.50    0.90 
   3  -6   0    8.10    1.20 
  -3  -6   0   10.20    1.70 
   3   6   0    9.50    0.80 
  -3   6   0    9.70    1.60 
   4  -6   0   14.70    1.10 
  -4  -6   0   16.60    2.00 
  -4  -6   0   14.40    1.80 
   4  -6   0   10.30    1.20 
   4  -6   0   14.40    1.10 
   4   6   0   13.50    1.00 
  -4   6   0   15.30    2.00 
  -5  -6   0   28.50    2.40 
   5  -6   0   32.80    1.90 
  -5  -6   0   34.10    2.80 
   5  -6   0   31.80    1.90 
  -5   6   0   35.10    2.90 
   5   6   0   34.40    1.90 
  -6  -6   0  326.97   14.40 
   6  -6   0  322.37   13.40 
  -6  -6   0  302.47   13.80 
   6  -6   0  327.17   13.40 
   6   6   0  317.37   13.40 
  -6   6   0  324.97   14.40 
   7  -6   0   -0.40    0.50 
  -7  -6   0   -0.30    0.80 
   7  -6   0    0.50    0.60 
  -7  -6   0    0.40    0.80 
  -7   6   0    0.00    1.20 
   7   6   0   -0.40    0.50 
   8  -6   0   69.69    3.50 
  -8  -6   0   65.09    4.00 
  -8  -6   0   65.59    4.80 
   8  -6   0   68.99    3.50 
  -8   6   0   72.79    5.80 
   8   6   0   66.79    3.50 
  -9  -6   0   60.99    4.90 
   9  -6   0   57.99    3.20 
   9  -6   0   54.89    3.20 
  -9  -6   0   52.69    3.80 
  -9   6   0   65.59    5.70 
   9   6   0   59.39    3.20 
  10  -6   0  114.99    5.70 
 -10  -6   0  116.09    7.30 
  10  -6   0  125.59    5.70 
 -10  -6   0  118.39    6.10 
  10   6   0  117.49    5.70 
 -10   6   0  115.39    7.70 
  11  -6   0   17.90    1.90 
  11  -6   0   21.30    2.00 
 -11  -6   0   20.20    4.20 
  11   6   0   20.40    2.80 
 -11   6   0   17.40    4.50 
  11   6   0   18.70    2.00 
 -12  -6   0    1.20    1.60 
  12  -6   0    2.20    1.00 
  12  -6   0    2.80    1.00 
  12   6   0    2.60    1.00 
 -12   6   0    0.60    1.50 
  13  -6   0    6.00    1.30 
  13  -6   0    8.10    1.90 
 -13  -6   0    5.90    2.30 
 -13   6   0   11.00    4.30 
  13   6   0    4.80    1.40 
 -14  -6   0   46.30    6.50 
  14  -6   0   45.90    3.30 
  14  -6   0   41.90    3.20 
  14   6   0   48.40    3.50 
 -15  -6   0   16.90    6.20 
 -16  -6   0   33.20    7.00 
   0  -7   0   -0.50    0.40 
   0  -7   0   -0.30    0.40 
   0  -7   0   -0.50    0.30 
   0  -7   0    0.10    0.70 
   1  -7   0   98.99    4.50 
  -1  -7   0   93.89    4.30 
  -1  -7   0  102.09    5.10 
   1  -7   0  109.19    4.90 
   1  -7   0   97.59    4.40 
   1  -7   0  108.09    5.00 
  -1  -7   0  109.19    5.10 
   1   7   0  105.49    4.50 
  -2  -7   0  224.48   10.40 
  -2  -7   0  262.07   10.30 
   2  -7   0  230.88    9.80 
   2  -7   0  216.98    9.70 
   2  -7   0  245.88   10.30 
  -2  -7   0  223.18    9.50 
   2  -7   0  234.28   10.00 
   2   7   0  236.78    9.80 
  -3  -7   0  141.89    6.90 
   3  -7   0  140.79    6.10 
   3  -7   0  130.99    6.20 
   3  -7   0  149.09    6.70 
   3  -7   0  137.19    6.10 
  -3  -7   0  149.49    6.70 
   3   7   0  143.29    6.10 
   4  -7   0   35.10    1.90 
  -4  -7   0   37.20    2.90 
   4  -7   0   27.90    2.00 
  -4  -7   0   32.60    2.60 
   4  -7   0   34.00    1.90 
  -4   7   0   36.50    2.80 
   4   7   0   32.80    1.80 
   5  -7   0   52.59    2.60 
  -5  -7   0   41.80    3.10 
   5  -7   0   49.30    2.60 
  -5  -7   0   51.99    3.60 
   5   7   0   52.19    2.60 
  -5   7   0   52.89    3.60 
  -6  -7   0  135.99    7.20 
   6  -7   0  135.99    6.10 
  -6  -7   0  133.19    6.70 
   6  -7   0  137.99    6.10 
   6   7   0  139.69    6.10 
  -6   7   0  142.99    7.30 
  -7  -7   0   18.80    2.50 
   7  -7   0   22.10    1.70 
  -7  -7   0   21.20    2.90 
   7  -7   0   20.90    1.60 
   7   7   0   21.40    1.60 
  -7   7   0   22.10    3.70 
   8  -7   0  651.03   26.10 
  -8  -7   0  614.44   26.50 
  -8  -7   0  591.34   27.20 
   8  -7   0  669.43   26.00 
  -8   7   0  611.14   27.60 
   8   7   0  644.84   26.00 
  -9  -7   0    5.40    1.50 
   9  -7   0    7.60    1.40 
   9  -7   0    8.10    1.50 
  -9  -7   0    9.30    2.20 
   9   7   0    7.30    1.50 
  -9   7   0    6.10    1.80 
  10  -7   0  276.47   11.40 
 -10  -7   0  259.07   13.10 
 -10  -7   0  262.77   11.90 
  10  -7   0  253.87   11.40 
 -10   7   0  258.27   13.40 
  10   7   0  258.57   11.50 
  11  -7   0   44.50    2.90 
  11  -7   0   38.00    2.70 
 -11  -7   0   41.90    5.30 
 -11  -7   0   46.50    3.50 
 -11   7   0   35.70    5.30 
  11   7   0   41.10    2.80 
  12  -7   0   16.10    2.00 
  12  -7   0   21.60    2.20 
 -12  -7   0   20.10    4.80 
  12   7   0   17.70    2.20 
 -12   7   0   13.30    4.60 
  13  -7   0    3.50    1.20 
 -13  -7   0    4.60    2.20 
  13  -7   0    1.90    1.10 
  13   7   0    4.30    1.30 
 -13   7   0    2.80    1.70 
 -14  -7   0   24.70    6.00 
  14  -7   0   12.70    2.20 
  14  -7   0   15.60    2.40 
 -14   7   0   23.80    5.60 
  14   7   0   13.10    2.40 
   0  -8   0   85.89    4.30 
   0  -8   0   82.49    4.30 
   0  -8   0   76.69    3.70 
   0  -8   0   77.09    3.50 
   1  -8   0  115.19    5.30 
  -1  -8   0  109.49    5.50 
   1  -8   0  111.59    5.40 
  -1  -8   0  103.29    4.60 
   1  -8   0  103.49    4.80 
   1  -8   0  100.79    4.70 
  -1  -8   0  116.29    5.40 
   1   8   0  112.49    4.80 
   2  -8   0  164.98    7.30 
   2  -8   0  162.78    7.20 
  -2  -8   0  168.18    8.00 
   2  -8   0  175.88    7.90 
  -2  -8   0  184.48    7.90 
  -2  -8   0  159.88    7.00 
   2  -8   0  180.18    7.60 
   2   8   0  173.88    7.30 
   3  -8   0  172.08    8.00 
  -3  -8   0  195.48    8.50 
   3  -8   0  182.28    7.90 
  -3  -8   0  190.38    8.70 
   3  -8   0  188.08    8.40 
   3  -8   0  176.18    7.80 
   3   8   0  187.88    7.80 
  -4  -8   0   50.99    3.40 
  -4  -8   0   51.39    3.60 
   4  -8   0   52.09    2.60 
   4  -8   0   51.99    2.60 
   4  -8   0   44.90    2.70 
   4   8   0   50.99    2.60 
  -4   8   0   56.09    3.50 
  -5  -8   0   14.40    2.20 
   5  -8   0   13.70    1.30 
   5  -8   0   12.80    1.20 
  -5  -8   0   13.20    2.40 
   5   8   0   16.10    1.20 
  -5   8   0   17.10    2.40 
   6  -8   0   12.40    1.30 
  -6  -8   0   11.60    2.50 
  -6  -8   0   10.10    2.10 
   6  -8   0   11.90    1.30 
  -6   8   0   14.80    2.80 
   6   8   0   12.00    1.20 
   7  -8   0   26.00    1.90 
  -7  -8   0   25.70    3.20 
   7  -8   0   28.70    1.90 
  -7  -8   0   21.60    2.80 
  -7   8   0   28.80    3.90 
   7   8   0   27.50    1.90 
   8  -8   0   49.00    2.90 
  -8  -8   0   51.49    4.50 
   8  -8   0   52.39    2.90 
  -8  -8   0   46.90    3.70 
   8   8   0   50.99    2.90 
  -8   8   0   51.19    5.30 
   9  -8   0   68.39    3.60 
  -9  -8   0   64.99    4.40 
  -9  -8   0   64.99    5.40 
   9  -8   0   65.39    3.60 
   9   8   0   70.49    3.70 
  -9   8   0   59.69    6.00 
 -10  -8   0   12.00    2.60 
 -10  -8   0   14.00    4.20 
  10  -8   0    6.80    1.50 
  10  -8   0    7.50    1.60 
 -10   8   0    3.50    1.80 
  10   8   0    6.70    1.20 
 -11  -8   0   46.10    3.80 
  11  -8   0   39.30    2.90 
  11  -8   0   37.50    2.80 
 -11  -8   0   42.10    5.50 
 -11   8   0   36.30    5.40 
  11   8   0   39.50    2.90 
  12  -8   0    6.90    1.40 
  12  -8   0    3.70    1.20 
 -12  -8   0    4.00    2.20 
  12   8   0    1.90    1.60 
  12   8   0    4.00    1.20 
 -12   8   0    1.20    1.80 
  13  -8   0   18.30    2.50 
  13  -8   0   14.80    2.20 
 -13  -8   0   19.50    5.80 
  13   8   0   15.20    2.30 
  14  -8   0    9.90    2.20 
 -14  -8   0   17.60    6.10 
  14  -8   0   13.50    2.40 
  14   8   0   10.30    2.30 
 -14   8   0   13.20    5.20 
  15  -8   0   36.30    3.20 
  15   8   0   39.00    3.50 
 -15   8   0   40.30    3.70 
   0  -9   0   -0.10    0.80 
   0  -9   0    0.00    0.50 
   0  -9   0   -0.40    0.40 
   0  -9   0   -0.70    0.40 
  -1  -9   0   35.60    1.90 
  -1  -9   0   40.20    2.90 
   1  -9   0   37.30    2.10 
   1  -9   0   40.70    2.80 
  -1  -9   0   47.00    3.10 
   1  -9   0   38.40    2.80 
   1  -9   0   37.50    2.00 
   1   9   0   40.10    2.10 
   2  -9   0  139.89    6.40 
  -2  -9   0  137.59    6.20 
   2  -9   0  160.18    6.90 
  -2  -9   0  155.18    7.20 
  -2  -9   0  151.18    7.30 
   2  -9   0  155.18    7.10 
   2  -9   0  143.59    6.50 
   2   9   0  151.78    6.50 
  -3  -9   0   12.20    2.10 
   3  -9   0   12.80    1.80 
  -3  -9   0   13.00    2.10 
   3  -9   0   11.30    1.20 
   3  -9   0   10.70    1.10 
   3  -9   0   13.30    1.90 
   3   9   0   11.70    1.10 
   4  -9   0    1.30    0.60 
  -4  -9   0    0.30    0.90 
   4  -9   0    0.20    0.70 
  -4  -9   0    0.60    0.70 
   4  -9   0    1.10    0.60 
   4   9   0    0.90    0.50 
  -4   9   0    0.70    0.70 
   5  -9   0   16.60    1.40 
   5  -9   0   14.00    1.40 
  -5  -9   0   11.90    2.30 
   5  -9   0   11.50    1.50 
  -5  -9   0   15.50    2.60 
  -5   9   0   17.50    2.60 
   5   9   0   17.10    1.30 
   6  -9   0  188.28    8.20 
  -6  -9   0  175.68    8.90 
   6  -9   0  185.08    8.20 
  -6  -9   0  186.98    9.40 
   6   9   0  192.98    8.20 
  -6   9   0  191.28    9.40 
   7  -9   0   12.20    1.50 
   7  -9   0   11.70    1.50 
  -7  -9   0   10.20    3.00 
  -7  -9   0   12.90    2.70 
   7   9   0   13.20    1.50 
  -7   9   0   16.00    3.50 
  -8  -9   0    0.30    1.10 
   8  -9   0   -1.20    0.70 
   8  -9   0    1.20    0.80 
  -8  -9   0    1.00    1.00 
  -8   9   0   -0.80    1.30 
   8   9   0   -0.50    0.70 
  -9  -9   0    0.20    1.20 
  -9  -9   0    0.20    1.00 
   9  -9   0    0.10    0.80 
   9  -9   0    1.10    0.80 
   9   9   0    1.10    0.80 
  -9   9   0    0.20    1.60 
  10  -9   0   12.10    1.90 
 -10  -9   0   13.80    2.90 
 -10  -9   0   12.30    4.10 
  10  -9   0   12.40    1.70 
  10   9   0   12.90    1.90 
  11  -9   0    4.80    1.20 
 -11  -9   0    3.80    2.00 
  11  -9   0    3.20    1.10 
 -11  -9   0   13.10    3.00 
 -11   9   0    0.60    1.70 
  11   9   0    5.30    1.20 
  12  -9   0   25.00    2.60 
 -12  -9   0   29.20    5.40 
  12  -9   0   22.70    2.30 
  12   9   0   16.80    3.30 
 -12   9   0   12.50    4.90 
  12   9   0   21.30    2.40 
  13  -9   0   22.20    2.50 
  13  -9   0   30.90    2.90 
 -13  -9   0   23.40    6.10 
  13   9   0   24.60    2.70 
 -13   9   0   18.10    5.50 
 -14  -9   0    1.70    2.80 
  14  -9   0    0.40    1.30 
  14  -9   0   -0.90    1.00 
  14   9   0    0.10    1.10 
 -14   9   0   -0.70    1.80 
  15  -9   0    0.60    1.20 
 -15  -9   0    4.20    3.00 
 -15   9   0    1.00    1.50 
  15   9   0    1.80    1.40 
 -15   9   0   19.10    6.00 
   0 -10   0   88.19    4.20 
   0 -10   0   99.29    5.10 
   0 -10   0   92.19    4.40 
   0 -10   0   98.99    5.10 
  -1 -10   0   80.59    3.80 
   1 -10   0   84.09    4.00 
   1 -10   0   84.09    4.70 
   1 -10   0   90.49    4.70 
   1 -10   0   84.49    3.90 
  -1 -10   0   84.79    4.80 
  -1 -10   0   87.59    4.80 
   1  10   0   91.59    4.00 
   2 -10   0   51.69    3.30 
   2 -10   0   50.49    3.20 
   2 -10   0   47.70    2.60 
   2 -10   0   46.00    2.50 
  -2 -10   0   45.60    2.20 
  -2 -10   0   50.19    3.50 
  -2 -10   0   53.49    3.50 
   2  10   0   49.70    2.50 
   3 -10   0   15.30    1.40 
   3 -10   0   16.00    2.10 
  -3 -10   0   20.10    2.60 
   3 -10   0   15.60    1.30 
   3 -10   0   15.40    2.10 
  -3 -10   0   16.50    2.50 
   3  10   0   16.20    1.30 
   4 -10   0   35.40    2.10 
   4 -10   0   31.00    2.00 
  -4 -10   0   34.80    3.10 
  -4 -10   0   34.30    3.30 
   4 -10   0   32.80    2.50 
  -4  10   0   37.30    3.20 
   4  10   0   35.00    2.00 
   5 -10   0    2.80    0.80 
   5 -10   0    2.00    0.70 
   5 -10   0    2.50    0.80 
  -5 -10   0    1.00    1.10 
  -5 -10   0    2.00    1.00 
   5  10   0    2.90    0.70 
  -5  10   0    1.90    1.00 
  -6 -10   0   26.30    3.10 
   6 -10   0   30.00    2.10 
   6 -10   0   29.50    2.10 
  -6 -10   0   28.10    3.50 
  -6  10   0   29.80    3.70 
   6  10   0   31.60    2.00 
  -7 -10   0    0.70    1.10 
   7 -10   0   -0.80    0.60 
  -7 -10   0   -0.50    1.00 
   7 -10   0    0.10    0.80 
  -7  10   0   -0.50    1.10 
   7  10   0   -0.90    0.60 
  -8 -10   0   11.00    3.70 
   8 -10   0   12.70    1.70 
   8 -10   0   14.80    1.70 
  -8 -10   0   14.10    2.90 
  -8  10   0   12.60    3.90 
   8  10   0   14.90    1.70 
   9 -10   0    0.00    0.80 
  -9 -10   0    0.30    1.10 
   9 -10   0    0.90    0.90 
  -9 -10   0    0.70    1.30 
  -9  10   0   -1.40    1.50 
   9  10   0   -0.10    0.80 
  10 -10   0   21.50    2.20 
  10 -10   0   23.50    2.30 
 -10 -10   0   25.70    3.50 
 -10 -10   0   25.20    5.00 
  10  10   0   24.50    2.30 
 -10  10   0   16.40    5.00 
  11 -10   0    1.60    1.00 
  11 -10   0    3.50    1.20 
 -11 -10   0   12.80    5.10 
 -11  10   0   -0.60    1.70 
  11  10   0    2.00    1.10 
 -12 -10   0    2.30    2.10 
  12 -10   0   -1.00    1.10 
  12 -10   0   -0.50    1.00 
 -12  10   0   -2.60    1.70 
  12  10   0   -0.20    1.00 
  12  10   0   -0.30    1.30 
 -13 -10   0    3.30    2.40 
  13 -10   0   -0.10    1.10 
  13 -10   0    2.00    1.30 
  13  10   0    0.40    1.10 
 -13  10   0   -1.70    1.90 
  14 -10   0    4.80    1.50 
  14 -10   0    8.30    1.80 
  14  10   0    7.00    1.70 
   0 -11   0    0.20    1.10 
   0 -11   0   -0.90    0.40 
   0 -11   0    0.10    0.60 
   0 -11   0    0.60    0.70 
   1 -11   0   70.09    3.50 
   1 -11   0   78.19    4.40 
  -1 -11   0   76.79    4.60 
   1 -11   0   73.79    4.40 
  -1 -11   0   69.09    3.40 
   1 -11   0   73.79    3.60 
  -1 -11   0   75.99    4.50 
   1  11   0   78.99    3.60 
  -2 -11   0  435.46   19.30 
  -2 -11   0  488.75   20.70 
   2 -11   0  510.45   20.10 
  -2 -11   0  492.45   20.30 
   2 -11   0  454.95   19.60 
   2 -11   0  480.55   20.40 
   2 -11   0  461.85   19.70 
   2  11   0  477.15   19.60 
   3 -11   0    7.70    1.20 
   3 -11   0    8.50    1.20 
   3 -11   0    8.60    2.10 
  -3 -11   0    5.10    1.30 
  -3 -11   0   10.30    2.60 
   3 -11   0    7.60    2.00 
   3  11   0    9.40    1.10 
   4 -11   0    5.10    1.10 
  -4 -11   0    2.30    1.20 
   4 -11   0    3.70    0.90 
   4 -11   0    3.40    1.00 
  -4 -11   0    3.40    1.10 
  -4  11   0    6.50    2.30 
   4  11   0    3.50    0.70 
   5 -11   0   13.70    1.50 
  -5 -11   0   10.20    3.00 
   5 -11   0   14.00    1.50 
  -5 -11   0   14.10    2.90 
   5 -11   0   11.50    1.80 
   5  11   0   14.20    1.40 
  -5  11   0   13.10    2.80 
  -6 -11   0   12.40    3.40 
   6 -11   0   14.10    1.60 
  -6 -11   0   18.20    3.00 
   6 -11   0   14.60    1.60 
   6  11   0   14.20    1.50 
  -6  11   0   13.70    3.20 
   7 -11   0    3.80    1.00 
  -7 -11   0    3.50    1.30 
   7 -11   0    4.50    1.10 
  -7 -11   0    4.20    1.50 
  -7  11   0    3.00    1.40 
   7  11   0    5.10    1.00 
  -8 -11   0   30.20    4.50 
   8 -11   0   30.30    2.40 
   8 -11   0   31.40    2.30 
  -8 -11   0   30.80    3.40 
   8  11   0   33.40    2.40 
  -8  11   0   23.10    4.40 
   9 -11   0    4.90    1.20 
   9 -11   0    3.30    1.00 
  -9 -11   0    4.20    1.50 
  -9 -11   0    2.30    1.60 
  -9  11   0    1.80    1.80 
   9  11   0    5.40    1.20 
  10 -11   0   -0.40    0.90 
  10 -11   0    0.50    1.00 
 -10 -11   0   -0.10    1.70 
 -10 -11   0    1.50    1.40 
  10  11   0    0.30    0.90 
 -10  11   0   -1.00    1.80 
  11 -11   0   11.50    1.90 
  11 -11   0   13.60    2.30 
 -11 -11   0   14.50    5.40 
 -11 -11   0   19.90    3.80 
  11  11   0   11.40    2.10 
  12 -11   0    0.20    1.30 
  12 -11   0    0.10    1.00 
 -12 -11   0   -2.00    2.20 
  12  11   0    1.50    1.20 
  12  11   0   -1.10    1.30 
 -12  11   0   -2.10    2.00 
  13 -11   0   13.50    2.70 
 -13 -11   0   23.60    6.20 
  13 -11   0   10.00    2.20 
  13  11   0   13.70    2.50 
  14 -11   0   -0.30    1.30 
  14 -11   0   -0.60    1.10 
 -14  11   0   -2.10    2.20 
  14  11   0    1.30    1.30 
   0 -12   0   13.50    2.70 
   0 -12   0   11.70    1.20 
   0 -12   0   14.70    2.40 
   0  12   0   15.60    1.40 
  -1 -12   0  226.08   10.80 
  -1 -12   0  238.68   11.00 
   1 -12   0  242.18   10.90 
   1 -12   0  216.98    9.80 
   1 -12   0  234.18   10.10 
  -1 -12   0  223.58    9.70 
   1 -12   0  244.68   10.70 
   1  12   0  236.08   10.00 
   2 -12   0    0.10    0.70 
  -2 -12   0    0.40    1.10 
   2 -12   0    0.80    0.70 
   2 -12   0    0.80    0.70 
   2 -12   0    0.10    1.00 
  -2 -12   0    0.60    0.80 
   2  12   0    0.40    0.60 
   3 -12   0   96.89    4.70 
  -3 -12   0   99.39    5.70 
   3 -12   0  101.19    5.30 
   3 -12   0   94.49    4.70 
  -3 -12   0  102.49    6.00 
   3 -12   0  100.59    5.60 
   3  12   0   96.79    4.60 
  -4 -12   0    1.30    1.10 
   4 -12   0    2.00    0.80 
   4 -12   0    1.60    0.80 
   4 -12   0    1.50    0.90 
  -4 -12   0    0.40    1.20 
   4  12   0    1.30    0.70 
  -4  12   0    1.80    1.00 
   5 -12   0   30.30    2.20 
  -5 -12   0   30.40    3.40 
   5 -12   0   28.30    2.20 
  -5 -12   0   27.10    3.80 
  -5  12   0   30.10    3.50 
   5  12   0   31.90    2.10 
  -6 -12   0   21.00    4.00 
   6 -12   0   19.40    2.00 
  -6 -12   0   21.30    3.30 
   6 -12   0   21.10    1.90 
   6  12   0   20.70    1.80 
  -6  12   0   18.40    3.50 
   7 -12   0   12.20    1.70 
   7 -12   0   11.90    1.80 
  -7 -12   0   15.80    3.30 
   7  12   0   11.50    1.70 
   8 -12   0   -0.60    0.80 
  -8 -12   0    1.10    1.30 
  -8 -12   0   -0.70    1.50 
   8 -12   0    0.20    0.90 
   8  12   0    0.30    0.80 
  -8  12   0   -1.70    1.30 
   9 -12   0    6.50    1.40 
  -9 -12   0    5.80    2.10 
  -9 -12   0   13.50    3.70 
   9 -12   0    9.50    1.70 
  -9  12   0    2.50    1.90 
   9  12   0    8.60    1.90 
 -10 -12   0    2.70    2.00 
  10 -12   0    0.30    0.90 
 -10 -12   0    3.80    1.60 
  10 -12   0    0.70    1.10 
 -10  12   0   -2.80    1.80 
  10  12   0    0.80    1.00 
  11 -12   0   26.70    2.80 
  11 -12   0   20.70    2.40 
 -11 -12   0   28.80    6.20 
  11  12   0   18.80    2.40 
 -11  12   0   14.60    5.40 
  12 -12   0   33.00    3.20 
  12 -12   0   28.60    2.70 
 -12 -12   0   43.40    6.60 
  12  12   0   25.10    4.30 
  12  12   0   29.00    2.90 
   0 -13   0   -0.70    0.60 
   0 -13   0   -0.30    0.80 
   0 -13   0    0.20    1.20 
   0  13   0   -0.70    0.60 
   1 -13   0    0.30    0.70 
   1 -13   0    0.10    0.80 
   1 -13   0    0.40    0.70 
  -1 -13   0    0.00    1.20 
  -1 -13   0    0.00    0.60 
   1 -13   0    0.30    1.20 
  -1 -13   0    0.40    0.90 
   1  13   0    0.40    0.70 
   2 -13   0  175.78    8.70 
  -2 -13   0  185.98    9.10 
   2 -13   0  169.08    7.90 
  -2 -13   0  176.88    8.80 
   2 -13   0  165.68    7.70 
   2 -13   0  190.28    8.60 
   2  13   0  173.98    7.80 
   3 -13   0   54.29    3.50 
   3 -13   0   45.10    2.80 
   3 -13   0   48.60    3.80 
  -3 -13   0   51.39    4.20 
  -3 -13   0   49.80    4.30 
   3 -13   0   49.70    2.90 
   3  13   0   51.09    2.80 
  -4 -13   0    0.70    1.10 
   4 -13   0    0.10    0.70 
  -4 -13   0    1.00    1.20 
   4 -13   0    2.00    1.00 
   4 -13   0    0.60    0.80 
  -4  13   0    0.70    1.00 
   4  13   0    0.00    0.60 
  -5 -13   0    4.70    1.50 
  -5 -13   0    5.40    1.50 
   5 -13   0    6.50    1.20 
   5 -13   0    6.60    1.50 
  -5  13   0    7.60    2.90 
   5  13   0    5.20    1.30 
   6 -13   0  119.49    5.90 
   6 -13   0  119.49    6.00 
  -6 -13   0  125.19    8.00 
  -6 -13   0  132.59    7.20 
   6  13   0  125.59    5.90 
  -6  13   0  120.79    7.50 
   7 -13   0  124.39    6.40 
   7 -13   0  129.39    6.30 
  -7 -13   0  134.79    8.70 
  -7 -13   0  141.79    7.70 
  -7  13   0  128.69    8.20 
   7  13   0  136.49    6.30 
   8 -13   0    0.50    0.90 
  -8 -13   0    3.50    1.60 
  -8 -13   0    2.30    2.00 
   8 -13   0    2.20    1.10 
   8  13   0    1.40    1.00 
  -8  13   0   -0.10    1.50 
  -9 -13   0   10.50    2.80 
   9 -13   0   13.80    2.40 
  -9 -13   0   24.00    4.20 
   9 -13   0   12.20    1.90 
   9  13   0   13.60    2.10 
  10 -13   0    4.90    1.40 
 -10 -13   0    6.10    2.00 
  10 -13   0    2.40    1.20 
 -10 -13   0    5.30    2.60 
  10  13   0    4.70    1.30 
 -10  13   0    0.20    2.10 
 -11 -13   0   25.40    6.40 
  11 -13   0   16.40    2.30 
  11 -13   0   21.40    2.80 
  11  13   0   17.40    2.40 
 -12 -13   0   34.20    6.90 
  12 -13   0   29.00    3.20 
  12 -13   0   20.80    2.50 
  12  13   0   22.00    4.40 
  12  13   0   20.20    2.70 
  13 -13   0   -0.20    1.20 
  13 -13   0    3.70    1.60 
  13  13   0   -0.50    1.50 
  13  13   0    1.70    1.30 
   0 -14   0  174.48    8.80 
   0 -14   0  171.18    7.70 
   0 -14   0  176.38    9.00 
   0  14   0  186.48    7.90 
  -1 -14   0   47.00    4.00 
  -1 -14   0   48.00    4.10 
   1 -14   0   44.10    2.60 
   1 -14   0   47.30    3.80 
   1 -14   0   43.80    2.80 
   1 -14   0   45.40    3.80 
   1  14   0   47.20    2.70 
   2 -14   0    4.40    1.30 
  -2 -14   0    4.70    1.40 
   2 -14   0    4.90    1.00 
   2 -14   0    4.30    0.90 
  -2 -14   0    7.20    2.90 
   2  14   0    3.40    0.90 
   3 -14   0    2.40    0.90 
  -3 -14   0    2.50    1.40 
  -3 -14   0    1.70    1.10 
   3 -14   0    2.00    1.10 
   3 -14   0    2.00    0.80 
   3 -14   0    0.50    0.90 
   3  14   0    1.20    0.70 
   4 -14   0    9.60    2.20 
  -4 -14   0    3.20    1.40 
   4 -14   0    4.10    1.00 
  -4 -14   0    4.60    1.50 
   4 -14   0    4.60    1.10 
   4  14   0    3.60    0.90 
  -4  14   0    3.00    1.30 
   5 -14   0    9.00    1.70 
  -5 -14   0   10.30    4.10 
  -5 -14   0    6.00    1.70 
   5 -14   0    8.50    1.60 
   5  14   0   10.50    1.50 
   6 -14   0   38.50    2.70 
  -6 -14   0   38.20    4.10 
   6 -14   0   33.70    2.80 
  -6 -14   0   40.80    5.30 
  -6  14   0   35.00    4.40 
   6  14   0   38.80    2.60 
   7 -14   0    0.00    0.90 
  -7 -14   0    3.00    1.60 
   7 -14   0    0.90    1.00 
  -7 -14   0   -1.10    1.70 
  -7  14   0   -1.10    1.30 
   7  14   0   -0.20    0.90 
  -8 -14   0   18.50    5.50 
  -8 -14   0   27.10    4.30 
   8 -14   0   16.10    2.10 
   8 -14   0   18.90    2.60 
   8  14   0   20.20    2.20 
   9 -14   0    2.20    1.30 
  -9 -14   0   13.60    4.20 
   9 -14   0    3.10    1.20 
  -9 -14   0    2.40    2.40 
   9  14   0    2.90    1.20 
  -9  14   0   -1.60    1.80 
  10 -14   0   64.49    4.50 
 -10 -14   0   66.09    7.70 
 -10 -14   0   81.39    6.30 
  10 -14   0   62.59    4.10 
  10  14   0   69.59    4.20 
  11 -14   0   31.70    3.30 
  11 -14   0   23.90    2.70 
  11  14   0   27.90    2.90 
  12 -14   0   14.80    2.40 
  12 -14   0   13.40    2.90 
  12  14   0   12.60    2.50 
   0 -15   0    1.20    1.30 
   0 -15   0    0.60    1.00 
   0  15   0   -0.40    0.80 
   1 -15   0   14.60    2.90 
  -1 -15   0   21.40    3.50 
   1 -15   0   18.10    3.10 
   1 -15   0   14.70    1.60 
  -1 -15   0   15.40    3.30 
   1  15   0   14.80    1.70 
  -1  15   0   13.30    1.70 
   2 -15   0   56.69    4.40 
   2 -15   0   57.19    3.40 
  -2 -15   0   58.89    5.00 
   2 -15   0   62.79    4.30 
  -2 -15   0   65.29    4.80 
   2 -15   0   61.29    3.30 
   2  15   0   58.49    3.30 
   3 -15   0   32.00    2.40 
   3 -15   0   32.20    2.40 
   3 -15   0   39.50    3.30 
  -3 -15   0   31.70    4.30 
  -3 -15   0   38.40    4.10 
   3 -15   0   29.60    3.50 
   3  15   0   34.10    2.30 
   4 -15   0    5.20    1.10 
   4 -15   0    4.20    1.10 
   4 -15   0    5.00    1.90 
  -4 -15   0    6.10    1.70 
  -4 -15   0    3.00    1.50 
   4  15   0    4.30    1.00 
  -4  15   0    3.10    1.30 
  -5 -15   0    2.00    1.50 
   5 -15   0    1.50    1.00 
   5 -15   0    1.80    1.00 
  -5 -15   0   -1.30    1.40 
  -5  15   0    0.30    1.20 
   5  15   0    0.80    0.80 
  -6 -15   0   23.00    3.90 
   6 -15   0   13.20    1.90 
   6 -15   0   15.10    2.20 
  -6 -15   0   13.20    5.00 
  -6  15   0   11.10    3.90 
   6  15   0   15.90    1.90 
   7 -15   0   15.30    2.10 
  -7 -15   0   22.70    4.10 
  -7 -15   0   13.20    5.20 
   7 -15   0   16.70    2.50 
   7  15   0   18.20    2.10 
   8 -15   0    9.00    2.00 
  -8 -15   0   22.80    4.30 
  -8 -15   0   14.90    5.70 
   8 -15   0   12.00    2.50 
   8  15   0   13.50    2.10 
   9 -15   0    1.10    1.40 
  -9 -15   0    4.20    2.60 
  -9 -15   0   16.40    4.70 
   9 -15   0    1.90    1.20 
   9  15   0    2.50    1.20 
  -9  15   0   -1.60    1.90 
 -10 -15   0   21.70    4.90 
  11 -15   0   27.30    3.30 
  11 -15   0   24.40    2.80 
  11  15   0   14.70    4.50 
  11  15   0   24.80    2.80 
   0 -16   0   50.29    4.40 
   0 -16   0   45.70    4.40 
   0  16   0   45.50    2.90 
   1 -16   0    1.40    1.10 
  -1 -16   0    3.50    1.60 
  -1 -16   0    2.90    1.30 
   1 -16   0    5.70    1.60 
   1  16   0    3.90    1.00 
  -1  16   0    3.10    1.00 
  -2 -16   0   21.70    3.60 
   2 -16   0   11.90    3.10 
   2 -16   0   13.70    1.70 
   2 -16   0   24.80    3.40 
  -2 -16   0   17.30    3.90 
   2 -16   0   14.40    1.90 
   2  16   0   14.80    1.70 
   3 -16   0    8.10    1.70 
  -3 -16   0   10.50    3.70 
  -3 -16   0   12.10    3.70 
   3 -16   0   15.80    2.80 
   3 -16   0   10.50    1.70 
   3 -16   0    5.50    1.40 
   3  16   0    9.20    1.50 
  -4 -16   0    2.00    1.60 
  -4 -16   0    3.30    1.70 
   4 -16   0    4.50    1.10 
   4 -16   0    3.70    1.10 
   4  16   0    3.50    1.00 
  -4  16   0    3.00    1.40 
  -5 -16   0    6.00    1.90 
   5 -16   0    7.20    1.40 
   5 -16   0   10.50    2.00 
  -5 -16   0    6.20    2.10 
  -5  16   0    4.10    1.60 
   5  16   0    6.40    1.50 
  -6 -16   0   13.60    4.80 
  -6 -16   0   15.10    4.20 
   6 -16   0    6.80    1.40 
   6 -16   0    6.40    1.40 
   6  16   0    7.20    1.70 
  -6  16   0    4.40    1.80 
   7 -16   0    2.50    1.30 
   7 -16   0    1.10    1.10 
  -7 -16   0    5.50    2.10 
  -7 -16   0    0.80    2.30 
  -7  16   0   -0.40    1.60 
   7  16   0    2.60    1.20 
   8 -16   0    2.60    1.30 
   8 -16   0    2.10    1.40 
  -8 -16   0    3.50    2.10 
   8  16   0    3.60    1.30 
  -9 -16   0   20.90    5.10 
  10 -16   0    0.90    1.40 
  10 -16   0   -1.00    1.20 
 -10 -16   0    0.20    3.00 
  10  16   0   -0.80    1.10 
  11 -16   0    5.30    1.70 
  11 -16   0    2.00    2.00 
  11  16   0    2.00    1.90 
  11  16   0    1.50    1.40 
   0 -17   0   -1.20    1.00 
   0 -17   0    3.00    1.60 
   0  17   0   -0.20    0.80 
   1 -17   0   -1.60    1.00 
   1 -17   0    3.60    1.50 
  -1 -17   0    2.90    1.60 
  -1 -17   0   -0.30    1.20 
   1  17   0   -0.30    0.80 
  -1  17   0   -0.10    0.90 
  -2 -17   0   21.50    3.90 
   2 -17   0   10.80    3.30 
  -2 -17   0   22.20    4.10 
   2 -17   0   25.40    3.50 
   2  17   0   14.40    1.80 
  -3 -17   0   16.50    4.10 
   3 -17   0    5.70    1.20 
   3 -17   0    7.90    1.80 
  -3 -17   0   12.10    4.10 
   3  17   0    6.30    1.50 
  -4 -17   0    7.30    2.10 
   4 -17   0    9.60    1.90 
   4 -17   0   12.30    2.00 
   4  17   0    7.20    1.70 
  -4  17   0   10.40    3.50 
  -5 -17   0    1.90    1.90 
   5  17   0    2.60    1.00 
  -6 -17   0   19.10    4.70 
  -6 -17   0    8.50    2.70 
   6 -17   0    7.60    1.60 
   6 -17   0    6.50    1.50 
   6  17   0    9.00    1.90 
  -7 -17   0   29.10    5.20 
   7 -17   0   11.40    2.00 
   7 -17   0   15.90    2.50 
   7  17   0   14.50    2.30 
   8 -17   0   40.40    3.70 
   8  17   0   42.10    3.30 
  -9 -17   0   41.10    6.80 
  -9 -17   0   33.80    5.80 
  10 -17   0    7.90    1.90 
  10  17   0    7.50    1.70 
  10  17   0    4.50    2.10 
   0 -18   0    8.70    3.50 
   0 -18   0   13.30    3.90 
   1 -18   0   37.20    4.20 
  -1 -18   0   47.60    4.90 
  -1 -18   0   35.40    4.90 
   1 -18   0   39.30    4.40 
   1  18   0   31.00    2.50 
  -1  18   0   31.50    2.60 
   2 -18   0   -0.20    1.20 
  -2 -18   0    1.70    1.60 
   2  18   0    0.20    0.90 
  -2  18   0    1.70    1.20 
  -3 -18   0   20.80    4.70 
   4 -18   0    1.40    1.10 
   4  18   0   -0.20    1.00 
   5 -18   0   19.50    2.60 
  -5 -18   0   25.90    5.70 
  -5 -18   0   31.90    5.10 
   5  18   0   16.80    2.20 
   6 -18   0   12.20    2.50 
  -6 -18   0   17.50    4.80 
   6  18   0   10.20    2.10 
   7 -18   0   -0.30    1.30 
   7  18   0   -0.10    1.10 
  -8 -18   0   37.70    5.90 
  -1 -19   0   30.90    4.90 
  -1 -19   0   43.70    5.50 
   1 -19   0   28.40    4.70 
  -2 -19   0   25.80    5.00 
  -2 -19   0   29.00    4.80 
   2 -19   0   27.30    4.20 
  -3 -19   0   16.60    5.30 
  -4 -19   0   99.69    7.10 
  -5 -19   0   21.10    5.20 
  -5 -19   0   21.50    5.30 
  -6 -19   0   23.80    5.00 
  -7 -19   0   45.60    5.60 
   7 -19   0   28.20    3.30 
   0 -20   0   56.09    5.70 
   1 -20   0   37.40    5.00 
  -1 -20   0   36.90    5.30 
  -2 -20   0   72.69    6.50 
  -4 -20   0   24.60    5.50 
  -5 -20   0  143.99   10.30 
  -1  21   0   -1.80    1.50 
  17   0  -1   10.30    2.50 
  15   0  -1   84.69    4.90 
 -13   0   1   60.29    5.80 
  13   0  -1   45.00    3.20 
  12   0  -1    0.00    0.80 
  12   0  -1    0.20    0.50 
 -12   0   1    2.50    1.40 
  11   0  -1   60.09    3.00 
 -11   0   1   56.39    5.20 
  11   0  -1   57.19    3.30 
  10   0  -1    0.00    0.50 
  10   0  -1   -0.50    0.60 
   9   0  -1   43.40    2.40 
  -9   0   1   32.70    3.80 
   9   0  -1   40.80    2.10 
  -8   0   1   -0.30    0.90 
   8   0  -1   -0.10    0.50 
   8   0  -1   -0.30    0.30 
   7   0  -1  117.39    5.10 
   7   0  -1  112.59    4.90 
  -7   0   1  109.49    4.90 
  -7   0   1  112.89    6.10 
  -6   0   1   -0.10    0.30 
  -6   0   1   -0.20    0.70 
   6   0  -1    0.30    0.30 
   6   0  -1   -0.10    0.40 
  -5   0   1 2056.89   88.49 
   5   0  -1 2238.38   88.69 
  -5   0   1 2290.27   89.19 
   5   0  -1 2175.28   88.29 
  -4   0   1    0.40    0.60 
   4   0  -1   -0.20    0.20 
  -4   0   1   -0.10    0.30 
   4   0  -1    0.00    0.20 
   3   0  -1 1321.57   52.89 
   3   0  -1 1283.67   52.69 
  -3   0   1 1353.76   53.09 
  -3   0   1 1270.67   52.89 
  -2   0   1    0.00    0.30 
  -2   0   1    0.10    0.20 
   2   0  -1   -0.10    0.10 
   2   0  -1   -0.20    0.10 
   1   0  -1  812.12   32.90 
  -1   0   1  738.73   32.90 
  -1   0   1  824.32   33.30 
   1   0  -1  819.32   32.90 
   0   0   1   -3.20    0.30 
   0   0  -1   -3.60    0.10 
  -1   0  -1 2018.60   77.69 
   1   0   1 1892.71   77.29 
  -1   0  -1 1863.51   77.19 
   1   0   1 1855.01   77.29 
   2   0   1   -2.80    0.20 
  -2   0  -1   -3.40    0.40 
   2   0   1   -3.00    0.20 
   2   0   1   -3.00    0.20 
   3   0   1  890.41   35.50 
   3   0   1  847.82   35.50 
   3   0   1  882.71   35.40 
  -3   0  -1  892.61   35.90 
   4   0   1   -0.40    0.30 
  -4   0  -1   -0.70    0.50 
   4   0   1   -0.30    0.30 
   4   0   1   -0.30    0.20 
   5   0   1 1079.39   43.90 
   5   0   1 1105.79   44.00 
  -5   0  -1 1126.79   44.60 
   5   0   1 1038.50   44.00 
   6   0   1   -0.40    0.30 
   6   0   1    0.40    0.40 
   6   0   1   -0.30    0.30 
  -6   0  -1   -0.40    0.60 
   7   0   1   42.40    2.10 
   7   0   1   41.10    2.20 
   7   0   1   40.10    2.20 
  -7   0  -1   39.30    3.30 
  -8   0  -1   -1.20    0.80 
   8   0   1    0.10    0.40 
   8   0   1   -0.50    0.50 
   8   0   1   -0.10    0.40 
   9   0   1    8.80    1.30 
   9   0   1   10.40    1.00 
 -10   0  -1   -1.50    1.00 
  10   0   1   -0.70    0.70 
 -11   0  -1  376.66   15.80 
  11   0   1  380.56   16.10 
 -11   0  -1  374.26   17.50 
 -13   0  -1   23.80    4.50 
  13   0   1   14.00    2.00 
  15   0   1  133.79    7.40 
 -15   0  -1  166.68   10.40 
  16   0   1    1.90    1.30 
  17  -1  -1   26.00    2.90 
  17   1  -1   25.00    3.00 
 -16  -1   1   55.19    7.10 
 -15  -1   1   29.80    5.50 
 -14  -1   1   23.40    4.90 
 -13  -1   1   21.50    4.70 
 -13   1   1   20.00    4.50 
  12  -1  -1   54.59    3.00 
 -12  -1   1   60.79    5.40 
  12  -1  -1   51.69    3.30 
  12   1  -1   50.69    3.20 
 -12   1   1   64.99    5.90 
  11  -1  -1   21.80    2.00 
  11  -1  -1   25.60    1.80 
 -11  -1   1   29.50    4.10 
  11   1  -1   22.60    2.00 
  11   1  -1   24.50    1.60 
 -11   1   1   30.60    4.30 
  10  -1  -1   60.69    3.40 
 -10  -1   1   69.49    5.10 
  10  -1  -1   63.49    3.10 
  10   1  -1   61.89    3.40 
 -10   1   1   64.69    5.30 
  10   1  -1   62.69    3.00 
  -9  -1   1   70.49    5.10 
   9  -1  -1   76.99    3.60 
   9  -1  -1   78.19    3.80 
  -9   1   1   74.39    5.40 
   9   1  -1   80.39    3.80 
   9   1  -1   80.19    3.50 
   8  -1  -1   75.89    3.60 
  -8  -1   1   71.39    3.60 
   8  -1  -1   77.19    3.50 
  -8  -1   1   70.39    4.80 
  -8   1   1   75.59    5.20 
   8   1  -1   76.99    3.60 
   8   1  -1   76.19    3.40 
  -7  -1   1   63.89    3.20 
  -7  -1   1   64.29    4.20 
   7  -1  -1   68.29    3.20 
   7  -1  -1   67.59    3.10 
  -7   1   1   68.19    4.60 
   7   1  -1   67.89    3.00 
   7   1  -1   70.19    3.30 
   6  -1  -1   24.30    1.50 
  -6  -1   1   22.60    1.60 
   6  -1  -1   22.60    1.30 
  -6  -1   1   24.40    2.60 
   6   1  -1   23.80    1.20 
   6   1  -1   23.10    1.40 
  -6   1   1   27.80    3.00 
  -5  -1   1  211.68    9.00 
   5  -1  -1  218.78    8.90 
  -5  -1   1  227.28    9.60 
   5  -1  -1  208.68    9.00 
  -5   1   1  212.08    9.70 
   5   1  -1  217.48    8.80 
   5   1  -1  207.48    9.00 
   4  -1  -1   23.40    1.20 
  -4  -1   1   22.50    2.10 
  -4  -1   1   20.30    1.50 
   4  -1  -1   23.60    1.20 
   4   1  -1   23.00    1.10 
   4   1  -1   23.30    1.20 
   3  -1  -1    2.70    0.50 
   3  -1  -1    2.10    0.50 
  -3  -1   1    3.50    1.10 
   3   1  -1    2.20    0.40 
   3   1  -1    2.80    0.50 
   2  -1  -1  115.99    4.90 
  -2  -1   1  132.89    5.20 
  -2  -1   1  114.59    5.00 
   2   1  -1  111.89    4.90 
   2   1  -1  119.89    4.80 
  -1  -1   1  499.75   18.40 
  -1  -1   1  404.86   18.40 
   1  -1  -1  456.95   18.50 
   1  -1  -1  470.35   18.50 
   1  -1  -1  457.65   18.30 
   1   1  -1  432.46   18.40 
  -1   1   1  458.95   18.40 
   0  -1  -1   35.60    1.30 
   0  -1   1   28.20    1.40 
   0  -1  -1   30.70    1.50 
   0  -1   1   31.00    1.40 
   0   1   1   35.30    1.50 
   0   1  -1   30.40    1.40 
  -1  -1  -1  111.69    4.90 
   1  -1   1  109.19    4.70 
  -1  -1  -1  101.99    4.70 
  -1  -1  -1  113.39    4.60 
   1  -1   1  115.79    4.70 
   1  -1   1  116.79    4.70 
   1   1   1  116.19    4.70 
  -1   1  -1  124.99    4.80 
   2  -1   1 2315.27   95.89 
  -2  -1  -1 2186.88   95.99 
  -2  -1  -1 2331.17   95.59 
   2  -1   1 2365.66   95.59 
  -2  -1  -1 2373.86   96.59 
   2  -1   1 2421.86   95.89 
  -2   1  -1 2626.84   96.49 
   2   1   1 2359.66   95.99 
   3  -1   1  329.67   13.50 
   3  -1   1  342.17   13.40 
  -3  -1  -1  324.17   13.90 
   3  -1   1  336.67   13.50 
  -3  -1  -1  318.27   13.40 
  -3  -1  -1  296.97   13.50 
   3   1   1  321.67   13.50 
  -3   1  -1  379.16   14.00 
   4  -1   1  151.58    6.30 
  -4  -1  -1  152.88    6.90 
   4  -1   1  153.38    6.20 
   4  -1   1  146.89    6.40 
  -4  -1  -1  132.39    6.30 
   4   1   1  152.58    6.20 
  -4   1  -1  162.78    7.00 
  -5  -1  -1  178.68    7.90 
   5  -1   1  161.28    7.20 
   5  -1   1  170.18    7.10 
  -5   1  -1  168.68    7.90 
   5   1   1  169.88    7.00 
   5   1   1  171.08    7.30 
   5   1   1  163.68    7.20 
  -6  -1  -1   22.90    2.40 
   6  -1   1   23.00    1.50 
   6  -1   1   24.20    1.40 
   6   1   1   23.20    1.30 
   6   1   1   23.90    1.50 
   6   1   1   25.90    1.70 
  -6   1  -1   25.20    2.80 
   7  -1   1   44.60    2.20 
   7  -1   1   42.40    2.30 
  -7  -1  -1   42.20    3.30 
   7   1   1   44.70    2.10 
   7   1   1   41.60    2.30 
   7   1   1   41.70    2.40 
  -7   1  -1   40.40    3.50 
   8  -1   1    7.70    0.90 
   8  -1   1    7.60    1.10 
  -8  -1  -1    4.20    1.10 
   8   1   1    7.00    1.20 
   8   1   1    6.50    1.00 
   9  -1   1  161.18    7.00 
   9  -1   1  164.88    6.80 
  -9  -1  -1  139.99    8.10 
  -9  -1  -1  152.88    6.70 
   9   1   1  151.08    7.00 
  -9   1  -1  145.39    8.20 
   9   1   1  171.48    7.20 
  10  -1   1   50.49    3.00 
  10  -1   1   53.99    2.70 
  10   1   1   50.19    3.00 
  11  -1   1    0.90    0.80 
 -11  -1  -1    1.50    1.20 
 -11   1  -1   12.90    3.90 
  11   1   1    1.70    0.80 
  12  -1   1   23.90    2.20 
 -12  -1  -1   31.70    4.70 
 -12   1  -1   23.70    2.00 
  12   1   1   23.30    2.20 
 -13  -1  -1   28.30    5.00 
  13  -1   1   15.70    2.10 
  13   1   1   18.90    2.10 
 -13   1  -1   15.80    1.90 
 -14  -1  -1   26.90    5.50 
 -15  -1  -1   25.30    6.10 
 -16  -1  -1   26.10    6.30 
 -16  -2   1   17.60    6.20 
 -15  -2   1   31.00    5.80 
  14  -2  -1   92.19    4.90 
  14  -2  -1   97.99    5.30 
 -14  -2   1  121.59    8.30 
  14   2  -1   95.29    5.30 
 -13  -2   1   11.40    4.50 
 -13   2   1   22.40    5.10 
  12  -2  -1   49.80    3.10 
  12  -2  -1   52.39    2.90 
 -12  -2   1   51.89    5.30 
  12   2  -1   49.50    3.10 
 -12   2   1   51.59    5.50 
  11  -2  -1   92.29    4.80 
 -11  -2   1  101.29    6.50 
  11  -2  -1   97.59    4.50 
 -11   2   1   92.09    6.60 
  11   2  -1   96.09    4.80 
  10  -2  -1  216.08    9.20 
 -10  -2   1  199.28   10.50 
  10  -2  -1  215.38    9.00 
  10   2  -1  205.88    9.20 
  10   2  -1  217.88    8.80 
 -10   2   1  204.18   10.90 
  -9  -2   1   13.00    1.60 
   9  -2  -1   15.50    1.40 
   9  -2  -1   15.50    1.30 
   9   2  -1   14.10    1.40 
  -9   2   1   19.90    3.80 
   9   2  -1   15.10    1.10 
  -8  -2   1   22.70    1.80 
  -8  -2   1   21.80    2.80 
   8  -2  -1   22.50    1.50 
   8  -2  -1   24.20    1.60 
  -8   2   1   23.50    3.70 
   8   2  -1   22.40    1.60 
   8   2  -1   23.00    1.30 
   7  -2  -1  616.84   25.00 
  -7  -2   1  583.84   25.70 
  -7  -2   1  602.34   25.00 
   7  -2  -1  620.54   24.80 
  -7   2   1  599.74   25.90 
   7   2  -1  618.64   24.70 
   7   2  -1  621.24   25.00 
  -6  -2   1   82.49    4.70 
   6  -2  -1   88.39    4.00 
  -6  -2   1   80.29    4.10 
   6  -2  -1   90.09    3.90 
   6   2  -1   89.29    3.70 
   6   2  -1   89.49    4.00 
  -6   2   1   90.79    5.20 
  -5  -2   1    6.80    1.10 
   5  -2  -1    6.30    0.70 
   5  -2  -1    6.00    0.70 
  -5  -2   1    6.00    1.50 
  -5   2   1    8.60    2.30 
   5   2  -1    6.80    0.50 
   5   2  -1    7.00    0.70 
  -4  -2   1   16.00    1.70 
   4  -2  -1   17.30    1.00 
  -4  -2   1   16.30    1.40 
   4  -2  -1   16.70    1.00 
   4   2  -1   17.80    0.80 
   4   2  -1   17.60    1.00 
  -4   2   1   21.20    2.20 
   3  -2  -1   13.70    0.80 
  -3  -2   1   10.10    1.50 
  -3  -2   1   13.80    1.40 
   3   2  -1   13.20    0.80 
   2  -2  -1  143.29    5.90 
  -2  -2   1  154.68    6.30 
  -2   2   1  135.49    5.90 
  -2   2   1  150.68    6.30 
   2   2  -1  134.09    5.90 
  -1  -2   1  122.89    5.40 
   1  -2  -1  130.79    5.30 
  -1  -2   1  135.19    5.40 
   1  -2  -1  137.09    5.40 
   1  -2  -1  113.49    5.20 
   1  -2  -1  121.39    5.20 
   1   2  -1  130.09    5.10 
   1   2  -1  122.79    5.20 
   0  -2   1 6095.89  249.18 
   0  -2  -1 6456.35  247.98 
   0  -2  -1 5380.26  246.08 
   0  -2  -1 6187.38  244.58 
   0  -2  -1 6885.11  244.18 
   0  -2   1 5772.62  243.38 
   0  -2   1 5521.15  246.88 
  -1  -2  -1    4.80    0.30 
   1  -2   1    3.80    0.40 
   1  -2   1    3.70    0.60 
  -1  -2  -1    3.50    0.60 
  -1  -2  -1    3.30    0.70 
   1  -2   1    3.50    0.40 
   1   2   1    3.70    0.30 
  -1   2  -1    3.40    0.60 
   2  -2   1 1440.96   56.69 
   2  -2   1 1382.56   56.79 
  -2  -2  -1 1235.58   56.99 
  -2  -2  -1 1484.35   56.49 
  -2  -2  -1 1522.65   57.29 
   2  -2   1 1269.67   56.69 
   2   2   1 1396.56   56.79 
  -2   2  -1 1518.05   57.19 
  -3  -2  -1  861.71   38.00 
   3  -2   1  947.01   38.00 
  -3  -2  -1  945.31   37.80 
  -3  -2  -1  954.00   38.40 
  -3   2  -1  993.00   38.40 
   3   2   1  927.61   37.90 
   4  -2   1  357.56   15.10 
  -4  -2  -1  351.96   14.90 
  -4  -2  -1  382.46   15.60 
   4  -2   1  376.96   15.00 
  -4  -2  -1  349.27   15.20 
  -4   2  -1  394.96   15.70 
   4   2   1  359.06   15.10 
  -5  -2  -1   12.90    1.20 
  -5  -2  -1   13.60    1.80 
  -5  -2  -1   11.90    0.80 
   5  -2   1   13.30    1.00 
   5  -2   1   13.30    1.00 
   5   2   1   12.80    1.00 
  -5   2  -1   16.00    2.30 
  -6  -2  -1   29.90    1.60 
   6  -2   1   33.70    1.70 
  -6  -2  -1   28.80    1.90 
   6  -2   1   32.90    1.80 
  -6  -2  -1   29.90    2.60 
  -6   2  -1   32.20    3.10 
   6   2   1   32.80    1.80 
   7  -2   1  251.77   10.70 
  -7  -2  -1  238.18   10.40 
   7  -2   1  256.37   10.50 
  -7  -2  -1  246.98   11.50 
   7   2   1  256.47   10.80 
   7   2   1  253.47   10.70 
  -7   2  -1  256.57   11.70 
  -8  -2  -1  345.27   14.50 
  -8  -2  -1  335.27   15.70 
   8  -2   1  357.46   14.80 
   8  -2   1  375.56   14.60 
  -8   2  -1  335.37   15.80 
   8   2   1  350.16   14.80 
   8   2   1  360.56   14.90 
   9  -2   1   22.60    1.80 
  -9  -2  -1   23.50    1.50 
   9  -2   1   23.40    1.60 
  -9  -2  -1   23.90    3.20 
   9   2   1   19.60    2.00 
   9   2   1   23.70    1.80 
  -9   2  -1   21.80    3.70 
 -10  -2  -1  235.58   10.30 
  10  -2   1  260.87   10.50 
  10  -2   1  241.78   10.70 
 -10  -2  -1  240.08   12.00 
 -10   2  -1  241.48   12.10 
  10   2   1  251.07   10.70 
  11  -2   1   41.30    2.40 
  11  -2   1   35.80    2.60 
  11   2   1   39.70    2.60 
 -12  -2  -1   57.09    5.70 
  12  -2   1   51.99    3.30 
  12   2   1   54.79    3.40 
 -12   2  -1   64.49    5.70 
 -12   2  -1   52.89    3.20 
 -14  -2  -1   43.80    5.80 
  14  -2   1   30.40    2.80 
  14   2   1   31.60    2.80 
 -15  -2  -1   29.80    6.10 
  16  -2   1   52.29    3.80 
  16   2   1   49.20    3.80 
 -16  -3   1   33.80    6.50 
  16  -3  -1   17.40    2.60 
  16   3  -1   18.20    2.70 
  15  -3  -1    9.20    2.10 
 -15  -3   1   24.00    5.90 
  15   3  -1   13.00    2.20 
 -14  -3   1   17.00    5.40 
  13  -3  -1    3.00    1.10 
 -13  -3   1    3.90    1.90 
  13  -3  -1    2.60    0.90 
  13   3  -1    1.10    1.00 
  12  -3  -1    2.50    0.90 
  12  -3  -1    5.90    1.40 
 -12  -3   1   13.10    3.90 
 -12   3   1   13.70    4.30 
  11  -3  -1   17.90    1.80 
  11  -3  -1   18.90    1.60 
  11   3  -1   15.50    1.80 
 -11   3   1   23.70    4.20 
  10  -3  -1   43.50    2.60 
 -10  -3   1   42.30    2.90 
 -10  -3   1   40.60    4.20 
  10  -3  -1   43.30    2.50 
 -10   3   1   47.00    5.00 
  10   3  -1   46.10    2.70 
   9  -3  -1    0.30    0.60 
  -9  -3   1    0.50    0.90 
   9  -3  -1    0.80    0.60 
  -9  -3   1    0.40    0.60 
   9   3  -1    0.10    0.60 
  -9   3   1    1.40    1.30 
   9   3  -1    0.70    0.40 
   8  -3  -1   31.10    1.90 
   8  -3  -1   27.90    1.80 
  -8  -3   1   27.40    2.20 
  -8  -3   1   32.20    3.10 
   8   3  -1   30.00    1.50 
  -8   3   1   28.40    3.80 
   8   3  -1   27.80    1.90 
   7  -3  -1  840.42   32.40 
   7  -3  -1  814.22   32.40 
  -7  -3   1  780.62   33.30 
  -7  -3   1  726.03   32.50 
   7   3  -1  812.62   32.40 
  -7   3   1  770.32   33.40 
   7   3  -1  819.42   32.10 
  -6  -3   1  170.78    8.20 
   6  -3  -1  169.98    7.40 
   6  -3  -1  172.88    7.40 
  -6  -3   1  174.88    7.60 
   6   3  -1  174.08    7.40 
   6   3  -1  178.08    7.10 
  -6   3   1  173.38    8.50 
   5  -3  -1   65.69    3.10 
   5  -3  -1   66.69    3.10 
  -5  -3   1   68.59    3.80 
  -5  -3   1   66.09    3.40 
   5   3  -1   66.99    3.10 
  -5   3   1   68.59    4.20 
   4  -3  -1   54.79    2.50 
  -4  -3   1   58.79    3.20 
   4  -3  -1   55.89    2.60 
  -4  -3   1   51.09    2.90 
  -4   3   1   59.19    3.30 
   4   3  -1   53.59    2.50 
  -3  -3   1   35.30    2.10 
  -3  -3   1   35.30    2.20 
   3  -3  -1   32.80    1.60 
  -3   3   1   31.40    1.60 
  -3   3   1   37.40    2.20 
   3   3  -1   31.80    1.60 
  -2  -3   1  858.81   33.10 
  -2  -3   1  736.73   33.00 
   2  -3  -1  696.23   32.70 
   2  -3  -1  899.01   33.10 
   2  -3  -1  845.52   32.80 
   2   3  -1  832.12   32.80 
   1  -3  -1 5202.38  212.78 
  -1  -3   1 5062.09  213.78 
   1  -3  -1 5698.33  214.48 
  -1  -3   1 5854.41  214.48 
   1  -3  -1 4826.52  213.18 
   1  -3  -1 4940.01  212.78 
   1   3  -1 5473.95  212.48 
   1   3  -1 5200.58  212.98 
   0  -3   1 3624.54  160.38 
   0  -3  -1 4508.35  161.68 
   0  -3   1 3671.33  160.58 
   0  -3  -1 4668.23  167.98 
   0  -3  -1 3846.42  161.58 
   0  -3  -1 3665.63  160.38 
   0  -3   1 3948.60  165.98 
   1  -3   1  671.33   25.80 
   1  -3   1  596.44   25.60 
  -1  -3  -1  604.24   25.90 
  -1  -3  -1  623.64   25.80 
  -1  -3  -1  680.63   25.60 
   1  -3   1  598.34   25.70 
   1  -3   1  643.14   25.80 
   1   3   1  654.23   25.60 
  -2  -3  -1  136.09    6.00 
  -2  -3  -1  116.29    5.70 
   2  -3   1  139.39    5.60 
   2  -3   1  126.89    5.60 
   2   3   1  134.39    5.50 
  -2   3  -1  140.69    5.80 
   3  -3   1  145.79    6.10 
   3  -3   1  145.29    6.20 
  -3  -3  -1  134.59    6.40 
  -3  -3  -1  153.28    6.70 
  -3   3  -1  161.08    6.70 
   3   3   1  141.69    6.20 
  -4  -3  -1   28.10    1.30 
  -4  -3  -1   31.60    2.30 
   4  -3   1   28.20    1.50 
   4  -3   1   29.30    1.60 
  -4  -3  -1   28.70    1.80 
  -4   3  -1   32.30    2.60 
   4   3   1   28.30    1.50 
   5  -3   1   93.19    4.10 
  -5  -3  -1   92.59    4.80 
  -5  -3  -1   86.69    3.80 
  -5  -3  -1   84.29    4.20 
   5  -3   1   89.59    4.00 
  -5   3  -1   94.29    5.00 
   5   3   1   88.59    4.00 
   6  -3   1    6.00    0.80 
  -6  -3  -1    4.50    1.10 
  -6  -3  -1    5.10    0.60 
   6  -3   1    5.10    0.90 
  -6  -3  -1    3.50    0.90 
  -6   3  -1    7.50    2.50 
   6   3   1    6.60    0.80 
   7  -3   1   42.90    2.40 
  -7  -3  -1   47.60    3.50 
  -7  -3  -1   40.80    2.60 
  -7  -3  -1   41.90    2.10 
   7  -3   1   47.90    2.40 
  -7   3  -1   49.10    4.00 
   7   3   1   43.60    2.40 
  -8  -3  -1   12.30    1.00 
   8  -3   1   11.40    1.20 
   8  -3   1   13.20    1.30 
  -8  -3  -1   11.30    2.50 
   8   3   1   11.60    1.30 
  -8   3  -1   11.70    3.40 
   8   3   1   12.50    1.70 
   9  -3   1  149.99    6.80 
  -9  -3  -1  145.99    6.40 
   9  -3   1  157.68    6.70 
  -9  -3  -1  144.69    8.00 
   9   3   1  151.08    6.80 
   9   3   1  158.08    7.10 
  -9   3  -1  144.69    8.30 
  10  -3   1   17.20    1.70 
  10  -3   1   21.30    1.70 
 -10  -3  -1   19.00    3.50 
  10   3   1   19.80    2.90 
 -10   3  -1   16.80    3.80 
  10   3   1   17.20    1.80 
  11  -3   1   27.20    2.00 
 -11  -3  -1   33.10    4.20 
  11  -3   1   26.40    2.20 
  11   3   1   24.60    2.20 
 -11   3  -1   36.00    4.60 
  12  -3   1    2.20    1.00 
 -12  -3  -1    1.60    1.50 
  12  -3   1    1.60    0.80 
 -12   3  -1   11.80    4.50 
  12   3   1    0.30    0.90 
 -13  -3  -1   12.80    4.40 
 -14  -3  -1   21.50    5.40 
 -15  -3  -1   26.40    5.90 
 -16  -3  -1   56.19    6.50 
 -16  -4   1   44.80    6.30 
 -15  -4   1   65.79    7.20 
  15  -4  -1   50.89    3.50 
  15  -4  -1   53.19    3.80 
  15   4  -1   57.39    3.90 
 -14  -4   1   16.20    5.00 
  13  -4  -1   -0.80    0.80 
  13  -4  -1    1.60    0.90 
 -13  -4   1    1.30    1.80 
 -13   4   1    1.90    1.60 
  13   4  -1    0.40    1.00 
 -12  -4   1   56.39    5.70 
  12  -4  -1   61.39    3.50 
  12  -4  -1   62.89    3.40 
  12   4  -1   58.39    3.50 
 -12   4   1   58.69    5.70 
  11  -4  -1   11.60    1.50 
 -11  -4   1   14.60    3.50 
  11  -4  -1   12.60    1.60 
  11   4  -1   10.20    1.60 
  10  -4  -1   10.00    1.40 
  10  -4  -1   10.30    1.40 
 -10  -4   1    7.40    1.90 
  10   4  -1    9.60    1.50 
  -9  -4   1    2.20    1.10 
   9  -4  -1    4.10    0.80 
   9  -4  -1    4.40    0.90 
  -9  -4   1    3.10    0.90 
  -9   4   1    2.80    1.40 
   9   4  -1    3.10    0.80 
  -8  -4   1  135.89    6.20 
   8  -4  -1  157.18    6.60 
   8  -4  -1  153.28    6.60 
  -8  -4   1  150.58    6.90 
  -8  -4   1  143.09    7.60 
  -8   4   1  154.78    8.30 
   8   4  -1  150.48    6.60 
   7  -4  -1  106.69    4.90 
  -7  -4   1  108.29    5.20 
   7  -4  -1  109.69    4.80 
  -7  -4   1  105.49    5.80 
  -7   4   1  111.09    6.50 
   7   4  -1  105.69    4.90 
   6  -4  -1   63.19    3.10 
  -6  -4   1   64.19    4.00 
  -6  -4   1   61.69    3.40 
   6  -4  -1   65.99    3.10 
   6   4  -1   65.49    3.10 
  -6   4   1   64.99    4.40 
   5  -4  -1  251.47   10.60 
  -5  -4   1  247.28   10.90 
  -5  -4   1  254.17   11.30 
   5  -4  -1  261.87   10.60 
  -5   4   1  261.57   11.40 
   5   4  -1  248.18   10.60 
  -4  -4   1  193.68    8.30 
   4  -4  -1  180.98    7.60 
  -4  -4   1  163.88    8.00 
   4  -4  -1  182.98    7.60 
   4   4  -1  176.78    7.60 
  -4   4   1  193.98    8.30 
  -3  -4   1   52.69    2.80 
  -3  -4   1   42.30    2.70 
   3  -4  -1   51.29    2.30 
   3  -4  -1   50.19    2.30 
   3  -4  -1   40.90    2.20 
  -3   4   1   53.59    2.90 
   3   4  -1   50.89    2.30 
   2  -4  -1  421.16   15.90 
   2  -4  -1  381.06   15.50 
  -2  -4   1  366.46   15.80 
  -2  -4   1  388.66   15.90 
   2  -4  -1  341.07   15.50 
   2  -4  -1  375.56   15.50 
   2   4  -1  388.16   15.50 
   1  -4  -1  840.42   34.60 
   1  -4  -1  903.71   35.00 
  -1  -4   1  792.32   34.50 
   1  -4  -1  825.22   34.60 
  -1  -4   1  943.91   35.00 
  -1  -4   1  842.52   34.90 
   1  -4  -1  842.42   34.70 
   1   4  -1  865.81   34.60 
   0  -4   1  629.24   27.40 
   0  -4  -1  737.13   27.60 
   0  -4  -1  704.63   27.40 
   0  -4  -1  655.93   27.30 
   0  -4   1  681.73   27.60 
   0  -4   1  629.14   27.30 
   0  -4   1  692.63   27.60 
   0  -4  -1  679.73   27.70 
   1  -4   1 2203.48   82.09 
   1  -4   1 1856.51   82.09 
  -1  -4  -1 1915.61   82.19 
  -1  -4  -1 2060.39   82.29 
   1  -4   1 2143.09   82.59 
   1  -4   1 1850.21   81.79 
  -1  -4  -1 2168.18   81.79 
   1   4   1 2037.20   82.09 
  -2  -4  -1  732.33   30.90 
   2  -4   1  734.63   30.50 
   2  -4   1  744.93   30.60 
   2  -4   1  724.33   30.50 
  -2   4  -1  806.92   30.80 
   2   4   1  775.62   30.50 
   3  -4   1  129.99    5.60 
   3  -4   1  127.59    5.50 
  -3  -4  -1  131.49    6.10 
   3  -4   1  134.39    5.60 
  -3  -4  -1  120.19    5.80 
  -3   4  -1  138.79    6.00 
   3   4   1  131.69    5.50 
  -4  -4  -1    9.30    1.30 
   4  -4   1   10.60    1.00 
   4  -4   1   10.20    0.90 
  -4  -4  -1   10.60    1.60 
   4  -4   1   11.20    0.90 
   4   4   1   11.00    0.90 
  -4   4  -1   13.20    1.80 
   5  -4   1   94.09    4.20 
   5  -4   1   92.09    4.20 
  -5  -4  -1   86.09    4.50 
  -5  -4  -1   95.89    5.00 
  -5   4  -1   95.69    5.20 
   5   4   1   94.69    4.20 
   6  -4   1  176.88    7.30 
   6  -4   1  176.48    7.40 
  -6  -4  -1  169.58    8.20 
  -6  -4  -1  157.28    7.60 
   6   4   1  170.08    7.40 
  -6   4  -1  175.38    8.50 
  -7  -4  -1   16.20    2.50 
   7  -4   1   15.30    1.30 
   7  -4   1   15.10    1.30 
  -7  -4  -1   14.00    0.90 
  -7  -4  -1   11.80    1.70 
  -7   4  -1   16.70    3.30 
   7   4   1   12.80    1.20 
  -8  -4  -1   14.20    1.80 
  -8  -4  -1   13.90    2.60 
  -8  -4  -1   15.50    1.00 
   8  -4   1   16.50    1.40 
   8  -4   1   16.80    1.40 
  -8   4  -1   16.10    3.60 
   8   4   1   16.10    1.40 
   9  -4   1   61.79    3.30 
   9  -4   1   64.89    3.20 
  -9  -4  -1   54.29    4.60 
   9   4   1   65.59    3.80 
   9   4   1   62.89    3.30 
  -9   4  -1   55.59    5.30 
  10  -4   1   94.29    4.30 
 -10  -4  -1   80.49    5.80 
  10  -4   1   81.99    4.40 
 -10   4  -1   83.69    6.20 
  10   4   1   89.29    4.90 
  10   4   1   89.59    4.50 
  11  -4   1    2.60    0.90 
  11  -4   1    1.60    0.80 
 -11   4  -1    9.70    3.80 
  11   4   1    1.40    0.90 
 -12  -4  -1   20.70    4.30 
  12  -4   1   17.20    1.80 
  12  -4   1   12.70    1.90 
  12   4   1   13.30    1.90 
 -13  -4  -1   20.40    5.10 
  13  -4   1   10.50    1.90 
  13   4   1   10.60    1.90 
 -13   4  -1   10.00    1.90 
 -14  -4  -1   63.39    6.40 
  14  -4   1   49.20    3.50 
 -14   4  -1   49.00    3.50 
  14   4   1   49.60    3.60 
 -15  -4  -1   43.80    6.40 
 -16  -4  -1  104.39    8.40 
 -16   4  -1  139.89    8.50 
 -15  -5   1   30.10    6.00 
  14  -5  -1   57.39    3.90 
  14  -5  -1   59.79    3.80 
 -14  -5   1   69.49    6.70 
 -14   5   1   75.79    7.10 
  14   5  -1   61.39    4.00 
 -13  -5   1    3.10    1.90 
  13  -5  -1   -0.50    0.90 
  13  -5  -1    0.80    0.90 
 -13   5   1    1.40    1.60 
  13   5  -1    1.00    1.00 
 -12  -5   1   14.20    4.30 
  12  -5  -1   10.10    1.70 
  12  -5  -1   11.90    1.70 
  12   5  -1   12.80    1.80 
 -11  -5   1   29.00    2.70 
  11  -5  -1   30.00    2.30 
 -11  -5   1   32.30    4.40 
  11  -5  -1   30.50    2.20 
 -11   5   1   24.10    4.70 
  11   5  -1   30.70    2.30 
 -10  -5   1  127.09    7.50 
 -10  -5   1  124.69    6.20 
  10  -5  -1  120.79    5.80 
  10  -5  -1  125.69    5.80 
  10   5  -1  121.09    5.90 
 -10   5   1  124.09    7.90 
   9  -5  -1   36.90    2.30 
  -9  -5   1   32.80    2.90 
   9  -5  -1   34.10    2.20 
  -9  -5   1   30.20    3.70 
  -9   5   1   40.60    4.80 
   9   5  -1   37.00    2.30 
  -8  -5   1   94.69    5.00 
  -8  -5   1   90.19    5.70 
   8  -5  -1   99.29    4.60 
   8  -5  -1   98.29    4.50 
  -8   5   1  101.09    6.60 
   8   5  -1  100.19    4.60 
   7  -5  -1    5.70    1.00 
  -7  -5   1    4.70    1.00 
   7  -5  -1    8.20    1.00 
   7   5  -1    8.60    1.10 
  -7   5   1   11.50    3.50 
  -6  -5   1  714.53   29.50 
   6  -5  -1  715.23   29.10 
  -6  -5   1  701.23   30.00 
   6  -5  -1  729.93   29.10 
   6   5  -1  698.33   29.10 
  -6   5   1  722.53   30.10 
   5  -5  -1   79.69    3.70 
  -5  -5   1   78.89    4.50 
  -5  -5   1   80.39    4.20 
   5  -5  -1   78.49    3.70 
  -5   5   1   83.49    4.60 
   5   5  -1   78.69    3.70 
   4  -5  -1  258.27   11.00 
  -4  -5   1  280.07   11.70 
  -4  -5   1  238.58   11.40 
   4  -5  -1  262.47   11.00 
  -4   5   1  288.67   11.80 
   4   5  -1  266.87   11.00 
   3  -5  -1  208.08    9.00 
  -3  -5   1  226.98    9.50 
   3  -5  -1  193.18    9.00 
   3  -5  -1  216.98    9.00 
  -3  -5   1  231.68    9.60 
  -3   5   1  231.88    9.70 
   3   5  -1  211.78    9.00 
   2  -5  -1  555.74   25.10 
   2  -5  -1  608.54   25.00 
   2  -5  -1  607.94   25.00 
   2  -5  -1  674.03   25.50 
  -2  -5   1  624.44   25.40 
  -2  -5   1  600.34   25.40 
   2   5  -1  640.84   25.00 
  -1  -5   1   60.19    2.90 
   1  -5  -1   49.90    2.30 
   1  -5  -1   52.69    2.80 
   1  -5  -1   51.69    2.60 
  -1  -5   1   47.70    2.40 
  -1  -5   1   51.09    2.70 
   1  -5  -1   51.59    2.30 
  -1  -5   1   47.50    2.20 
   0  -5  -1  939.51   37.30 
   0  -5   1  858.31   37.30 
   0  -5   1  848.52   37.20 
   0  -5   1  990.40   37.60 
   0  -5  -1  868.21   37.20 
   0  -5  -1  903.51   37.70 
   0  -5  -1 1045.00   37.60 
   0  -5   1  916.21   37.50 
  -1  -5  -1   47.70    2.80 
   1  -5   1   54.29    2.70 
   1  -5   1   47.80    2.30 
  -1  -5  -1   58.89    2.80 
   1  -5   1   49.40    2.40 
  -1  -5  -1   53.29    2.20 
   1  -5   1   51.99    2.80 
   1   5   1   53.69    2.30 
  -2  -5  -1  302.87   12.10 
   2  -5   1  277.97   11.70 
   2  -5   1  264.77   11.80 
   2  -5   1  268.37   11.70 
   2  -5   1  301.47   12.00 
  -2  -5  -1  279.47   12.20 
   2   5   1  294.57   11.70 
   3  -5   1    0.60    0.40 
   3  -5   1    0.80    0.50 
  -3  -5  -1    0.30    0.50 
  -3  -5  -1    0.70    0.60 
   3  -5   1    0.40    0.40 
  -3   5  -1    0.90    0.50 
   3   5   1    0.70    0.30 
  -4  -5  -1   23.10    1.90 
   4  -5   1   24.80    1.50 
  -4  -5  -1   22.90    2.20 
   4   5   1   25.40    1.40 
  -4   5  -1   26.40    2.30 
  -5  -5  -1   16.80    1.70 
   5  -5   1   17.90    1.30 
  -5  -5  -1   20.20    2.20 
   5  -5   1   18.30    1.30 
  -5   5  -1   20.20    2.60 
   5   5   1   19.00    1.30 
  -6  -5  -1   96.09    4.90 
   6  -5   1   97.29    4.50 
  -6  -5  -1  101.49    5.50 
   6  -5   1   97.99    4.50 
   6   5   1   97.89    4.50 
  -6   5  -1   99.49    5.80 
   7  -5   1   65.49    3.30 
  -7  -5  -1   60.79    4.30 
   7  -5   1   64.89    3.20 
  -7  -5  -1   60.19    3.60 
  -7   5  -1   67.79    5.00 
   7   5   1   65.09    3.20 
  -8  -5  -1    0.90    0.90 
   8  -5   1    1.30    0.70 
   8  -5   1    1.10    0.60 
  -8  -5  -1    0.90    0.80 
  -8   5  -1    1.40    1.30 
   8   5   1    1.60    0.70 
  -9  -5  -1    2.80    1.20 
   9  -5   1    4.10    0.90 
   9  -5   1    3.50    0.90 
  -9   5  -1    2.50    1.50 
   9   5   1    3.20    0.90 
  10  -5   1    0.40    0.70 
  10  -5   1   -0.10    0.70 
 -10  -5  -1    0.50    1.00 
 -10   5  -1    0.40    1.30 
  10   5   1   -0.20    0.80 
  10   5   1   -0.50    0.70 
 -11  -5  -1   19.20    4.10 
  11  -5   1   12.30    1.70 
  11  -5   1   11.80    1.80 
 -11   5  -1   12.40    3.90 
  11   5   1    9.60    1.70 
  12  -5   1   36.40    2.60 
  12  -5   1   34.10    2.70 
 -12  -5  -1   35.20    5.20 
  12   5   1   34.70    2.70 
 -12   5  -1   41.80    5.10 
 -14  -5  -1   15.30    5.60 
 -16  -5  -1   36.20    6.40 
 -16  -6   1   36.60    6.50 
 -15  -6   1   29.20    6.40 
  14  -6  -1   21.20    2.50 
  14  -6  -1   22.10    2.50 
 -14  -6   1   37.50    6.30 
  14   6  -1   25.20    2.70 
  13  -6  -1   44.40    3.10 
 -13  -6   1   44.00    6.10 
  13  -6  -1   44.50    3.00 
  13   6  -1   42.80    3.10 
 -13   6   1   35.70    5.40 
  12  -6  -1   41.10    2.70 
 -12  -6   1   37.50    5.00 
  12  -6  -1   34.50    2.60 
 -12   6   1   34.30    5.30 
  12   6  -1   35.00    2.70 
  11  -6  -1    6.90    1.60 
  11  -6  -1    5.30    1.10 
 -11  -6   1   11.00    4.00 
  11   6  -1    6.90    1.60 
 -11   6   1    4.10    1.80 
  10  -6  -1   71.29    3.90 
 -10  -6   1   74.29    4.50 
 -10  -6   1   88.89    5.90 
  10  -6  -1   73.59    3.90 
  10   6  -1   75.79    4.00 
 -10   6   1   74.39    6.30 
  -9  -6   1   20.10    3.30 
  -9  -6   1   13.40    2.50 
   9  -6  -1   15.70    1.60 
   9  -6  -1   15.20    1.70 
   9   6  -1   17.60    1.70 
  -9   6   1   23.20    4.70 
   8  -6  -1  110.19    5.00 
  -8  -6   1  102.39    5.60 
   8  -6  -1  109.49    5.10 
  -8  -6   1  106.99    6.30 
  -8   6   1  108.29    7.10 
   8   6  -1  111.19    5.10 
   7  -6  -1   43.40    2.30 
  -7  -6   1   40.50    3.50 
   7  -6  -1   40.40    2.30 
  -7  -6   1   36.30    2.90 
  -7   6   1   42.60    4.10 
   7   6  -1   42.10    2.30 
  -6  -6   1   11.20    2.00 
  -6  -6   1   13.70    2.20 
   6  -6  -1   13.50    1.20 
   6  -6  -1   13.00    1.20 
   6   6  -1   13.30    1.20 
  -6   6   1   17.10    2.70 
  -5  -6   1  768.42   32.30 
   5  -6  -1  802.92   31.90 
  -5  -6   1  773.72   32.60 
   5  -6  -1  794.82   31.80 
   5   6  -1  759.62   31.80 
  -5   6   1  755.52   31.70 
  -5   6   1  820.62   32.70 
  -4  -6   1  159.68    7.20 
   4  -6  -1  130.59    6.50 
   4  -6  -1  160.28    6.60 
   4  -6  -1  152.58    6.60 
  -4  -6   1  161.08    7.40 
  -4   6   1  167.88    7.50 
   4   6  -1  154.08    6.60 
   3  -6  -1   26.90    1.80 
   3  -6  -1   33.00    2.30 
   3  -6  -1   31.10    1.60 
  -3  -6   1   31.20    2.40 
   3  -6  -1   30.50    1.60 
  -3  -6   1   29.90    2.30 
   3   6  -1   31.80    1.60 
  -2  -6   1  542.25   20.10 
   2  -6  -1  467.35   19.60 
   2  -6  -1  472.15   19.60 
   2  -6  -1  413.36   19.70 
  -2  -6   1  471.65   20.10 
   2  -6  -1  512.55   20.10 
   2   6  -1  484.35   19.60 
  -1  -6   1  394.56   16.60 
  -1  -6   1  378.66   16.30 
   1  -6  -1  408.26   16.70 
  -1  -6   1  406.16   16.70 
   1  -6  -1  430.36   16.50 
  -1  -6   1  371.56   16.10 
   1  -6  -1  405.26   16.20 
   1  -6  -1  379.16   16.20 
   0  -6   1   13.30    1.00 
   0  -6  -1   14.00    0.90 
   0  -6  -1   13.50    0.80 
   0  -6  -1   12.20    1.50 
   0  -6   1   11.40    0.80 
   0  -6   1   14.50    1.70 
   0  -6   1   13.30    1.40 
   0  -6  -1   15.10    1.50 
  -1  -6  -1  714.03   31.10 
   1  -6   1  778.82   31.00 
  -1  -6  -1  826.52   31.00 
   1  -6   1  677.43   30.60 
   1  -6   1  833.02   31.00 
   1  -6   1  700.13   30.70 
  -1  -6  -1  754.52   30.50 
   1   6   1  762.62   30.60 
   2  -6   1  132.09    5.70 
  -2  -6  -1  122.69    6.00 
   2  -6   1  117.59    5.30 
   2  -6   1  123.99    5.40 
  -2  -6  -1  127.39    5.80 
   2  -6   1  118.49    5.60 
   2   6   1  129.89    5.30 
   3  -6   1  375.66   16.40 
  -3  -6  -1  399.36   16.70 
  -3  -6  -1  400.66   17.00 
   3  -6   1  385.66   16.30 
   3  -6   1  384.06   16.30 
  -3   6  -1  428.26   16.90 
   3   6   1  402.46   16.30 
   4  -6   1  755.62   33.20 
   4  -6   1  819.22   33.30 
  -4  -6  -1  871.31   34.20 
  -4  -6  -1  741.33   33.60 
   4  -6   1  822.82   33.30 
   4   6   1  846.52   33.30 
  -4   6  -1  876.61   34.00 
   5  -6   1  188.58    8.30 
   5  -6   1  195.88    8.30 
   5  -6   1  173.58    8.00 
  -5  -6  -1  196.38    9.20 
  -5  -6  -1  189.88    8.70 
   5   6   1  199.28    8.20 
  -5   6  -1  209.58    9.10 
   6  -6   1   12.90    1.20 
  -6  -6  -1    8.50    1.80 
   6  -6   1   14.10    1.20 
  -6  -6  -1   14.40    2.30 
  -6   6  -1   18.40    3.20 
   6   6   1   12.80    1.20 
  -7  -6  -1  228.48   10.70 
  -7  -6  -1  234.68   11.40 
   7  -6   1  251.27   10.30 
   7  -6   1  250.77   10.40 
  -7   6  -1  240.68   11.80 
   7   6   1  242.88   10.30 
   8  -6   1    7.00    1.30 
  -8  -6  -1    4.60    1.10 
  -8  -6  -1    6.90    2.60 
   8  -6   1    7.40    1.30 
  -8   6  -1    5.00    1.60 
   8   6   1    6.10    1.20 
  -9  -6  -1   93.79    5.20 
  -9  -6  -1   97.19    6.30 
   9  -6   1  101.79    4.80 
   9  -6   1   97.69    4.80 
   9   6   1  100.19    4.80 
  -9   6  -1   96.79    6.80 
 -10  -6  -1   44.50    4.70 
  10  -6   1   40.50    2.60 
  10  -6   1   40.00    2.70 
 -10   6  -1   39.30    4.90 
  10   6   1   39.50    3.40 
  10   6   1   39.70    2.70 
  11  -6   1   19.70    2.00 
  11  -6   1   17.00    1.90 
 -11  -6  -1   18.20    4.10 
  11   6   1   18.10    2.00 
 -11   6  -1   14.90    4.30 
  11   6   1   21.00    2.70 
 -12  -6  -1    0.80    1.60 
  12  -6   1    1.00    0.90 
  12  -6   1   -0.30    0.80 
 -12   6  -1    0.20    1.40 
  12   6   1   -0.10    0.90 
  13  -6   1    3.10    1.10 
  13  -6   1    2.70    1.20 
 -13  -6  -1    4.20    2.10 
  13   6   1    3.30    1.20 
  15  -6   1   21.60    2.60 
 -15  -6  -1   36.40    6.60 
 -15   6  -1   18.20    2.80 
  15   6   1   24.60    2.80 
 -15  -7   1   69.49    7.90 
  15  -7  -1   65.09    4.30 
  15  -7  -1   69.29    4.40 
 -15   7   1   81.29    8.10 
  15   7  -1   68.49    4.50 
 -14  -7   1   16.50    5.90 
  14  -7  -1    0.80    1.10 
  14  -7  -1    1.90    1.30 
 -14   7   1    1.10    1.70 
  14   7  -1    3.20    1.30 
 -13  -7   1   13.60    5.30 
  13  -7  -1    2.10    1.00 
  13  -7  -1    4.30    1.20 
 -13   7   1    1.00    1.80 
  13   7  -1    3.60    1.20 
 -12  -7   1    6.50    2.10 
  12  -7  -1    5.00    1.10 
  12  -7  -1    9.80    1.90 
  12   7  -1    6.30    1.30 
 -12   7   1    3.90    1.90 
 -11  -7   1   43.70    5.20 
  11  -7  -1   43.00    2.80 
 -11  -7   1   43.60    3.40 
  11  -7  -1   40.40    2.80 
  11   7  -1   41.10    2.90 
 -11   7   1   42.90    5.50 
  10  -7  -1    1.30    0.80 
  10  -7  -1    1.70    0.90 
 -10  -7   1    1.50    1.00 
 -10   7   1    2.10    1.60 
  10   7  -1    2.10    0.90 
  -9  -7   1  122.09    7.60 
   9  -7  -1  132.29    6.20 
  -9  -7   1  128.79    6.80 
   9  -7  -1  139.89    6.20 
   9   7  -1  136.79    6.20 
  -9   7   1  138.49    8.60 
   8  -7  -1   29.40    2.10 
  -8  -7   1   23.00    2.80 
   8  -7  -1   29.30    2.00 
   8   7  -1   29.40    2.10 
  -8   7   1   37.40    4.70 
   7  -7  -1  264.77   11.40 
   7  -7  -1  271.17   11.50 
  -7  -7   1  270.27   12.60 
  -7  -7   1  270.57   12.00 
   7   7  -1  267.17   11.40 
  -7   7   1  271.27   12.80 
   6  -7  -1    5.70    1.00 
  -6  -7   1    5.80    2.10 
  -6  -7   1    4.00    1.10 
  -6   7   1    9.70    2.50 
  -6   7   1    3.50    0.90 
  -5  -7   1  156.98    7.50 
   5  -7  -1  154.68    6.60 
   5  -7  -1  150.48    6.60 
  -5  -7   1  137.69    7.10 
  -5   7   1  144.39    6.60 
   5   7  -1  154.68    6.60 
  -5   7   1  162.28    7.60 
   4  -7  -1   93.19    4.80 
  -4  -7   1  110.99    5.70 
   4  -7  -1  111.79    4.80 
   4  -7  -1  108.79    4.80 
  -4  -7   1   97.69    5.30 
   4   7  -1  114.29    4.80 
  -4   7   1  119.99    5.70 
   3  -7  -1  487.95   20.20 
  -3  -7   1  530.45   20.80 
   3  -7  -1  437.36   20.30 
   3  -7  -1  517.75   20.80 
   3  -7  -1  481.25   20.20 
  -3  -7   1  510.35   20.90 
   3   7  -1  494.15   20.20 
  -2  -7   1  757.62   31.80 
   2  -7  -1  745.33   31.40 
   2  -7  -1  803.12   31.80 
   2  -7  -1  752.42   31.20 
  -2  -7   1  803.12   31.70 
   2  -7  -1  738.13   31.20 
   2   7  -1  780.32   31.20 
   1  -7  -1  118.49    5.60 
   1  -7  -1  115.29    5.10 
  -1  -7   1  112.89    5.20 
  -1  -7   1  117.19    5.60 
  -1  -7   1  127.19    5.70 
   1  -7  -1  124.49    5.50 
  -1  -7   1  110.29    5.00 
   1  -7  -1  120.39    5.00 
   0  -7   1   71.79    3.70 
   0  -7   1   60.29    2.90 
   0  -7  -1   63.39    3.00 
   0  -7   1   65.69    3.40 
   0  -7  -1   62.29    3.40 
   0  -7  -1   65.79    2.90 
   0  -7  -1   63.39    3.60 
   0  -7   1   62.19    3.00 
  -1  -7  -1  737.63   28.90 
   1  -7   1  634.54   28.40 
   1  -7   1  776.12   28.80 
  -1  -7  -1  687.73   28.30 
  -1  -7  -1  691.93   29.10 
   1  -7   1  721.13   28.90 
   1  -7   1  649.24   28.50 
   1   7   1  702.83   28.40 
  -2  -7  -1   18.50    2.00 
   2  -7   1   16.70    1.90 
   2  -7   1   13.90    1.10 
   2  -7   1   17.50    1.20 
  -2  -7  -1   16.20    1.90 
  -2  -7  -1   15.40    0.90 
   2  -7   1   17.20    1.60 
   2   7   1   16.30    1.10 
   3  -7   1  484.05   21.90 
   3  -7   1  511.55   21.80 
   3  -7   1  521.25   21.90 
  -3  -7  -1  584.54   22.40 
  -3  -7  -1  539.15   22.60 
   3   7   1  533.25   21.80 
  -3   7  -1  560.14   22.50 
   4  -7   1   20.90    1.40 
   4  -7   1   19.20    1.40 
  -4  -7  -1   19.40    2.40 
  -4  -7  -1   16.90    2.00 
   4  -7   1   17.00    1.60 
  -4   7  -1   18.90    2.20 
   4   7   1   20.90    1.30 
   5  -7   1  145.09    6.20 
   5  -7   1  121.99    6.00 
   5  -7   1  141.19    6.20 
  -5  -7  -1  140.29    7.20 
  -5  -7  -1  140.29    6.70 
   5   7   1  143.89    6.10 
  -5   7  -1  147.69    7.10 
  -6  -7  -1   12.00    2.20 
   6  -7   1   15.60    1.40 
   6  -7   1   14.40    1.30 
  -6  -7  -1   15.20    2.50 
   6   7   1   16.00    1.30 
  -6   7  -1   18.80    3.00 
  -7  -7  -1  164.28    8.10 
  -7  -7  -1  176.38    8.90 
   7  -7   1  175.28    7.60 
   7  -7   1  175.48    7.60 
  -7   7  -1  171.68    9.20 
   7   7   1  170.48    7.60 
  -8  -7  -1   11.50    2.90 
  -8  -7  -1    4.10    1.20 
   8  -7   1    6.00    1.30 
   8  -7   1    7.50    1.30 
   8   7   1    7.00    1.40 
  -8   7  -1    4.60    1.70 
  -9  -7  -1    1.40    1.20 
  -9  -7  -1    1.50    1.00 
   9  -7   1    2.00    0.90 
   9  -7   1    2.20    0.90 
  -9   7  -1    1.00    1.40 
   9   7   1    2.80    0.90 
  10  -7   1   31.70    2.40 
  10  -7   1   28.60    2.30 
 -10  -7  -1   31.60    4.50 
 -10   7  -1   28.80    4.70 
  10   7   1   30.80    3.20 
  10   7   1   29.40    2.30 
 -11  -7  -1   16.00    4.20 
  11  -7   1   14.00    1.80 
  11  -7   1   14.10    2.00 
  11   7   1   12.00    1.80 
  11   7   1   11.80    2.60 
 -12  -7  -1    0.80    1.70 
  12  -7   1    1.40    1.00 
  12  -7   1    2.20    1.10 
  12   7   1    0.20    1.00 
 -12   7  -1   -0.40    1.50 
 -13  -7  -1   48.40    6.50 
  13  -7   1   45.10    3.20 
  13  -7   1   46.80    3.30 
  13   7   1   45.30    3.40 
 -13   7  -1   46.70    5.70 
 -14  -7  -1   16.50    5.80 
 -15   8   1   15.70    5.70 
 -14  -8   1   26.00    6.20 
  14  -8  -1   15.00    2.50 
  14  -8  -1   10.40    2.20 
  14   8  -1   14.70    2.40 
 -13  -8   1   19.40    5.20 
  13  -8  -1    8.60    1.90 
  13  -8  -1   13.90    2.30 
 -13   8   1    4.30    2.20 
  13   8  -1    9.70    2.10 
  12  -8  -1    0.40    0.90 
  12  -8  -1    1.90    1.10 
 -12  -8   1    4.60    2.00 
  12   8  -1    1.30    1.10 
 -12   8   1   -0.20    1.70 
 -11  -8   1   19.30    4.50 
  11  -8  -1    9.80    1.70 
  11  -8  -1   16.00    2.00 
  11   8  -1   12.20    1.90 
  10  -8  -1   40.10    2.70 
  10  -8  -1   37.50    2.60 
 -10  -8   1   38.40    3.30 
 -10  -8   1   44.90    5.00 
 -10   8   1   32.30    5.20 
  10   8  -1   35.80    2.60 
  -9  -8   1  125.59    6.80 
   9  -8  -1  124.19    6.10 
   9  -8  -1  135.39    6.20 
  -9  -8   1  133.19    7.90 
  -9   8   1  127.09    8.40 
   9   8  -1  137.69    6.20 
  -8  -8   1  102.59    5.80 
   8  -8  -1  107.69    5.10 
  -8  -8   1  104.59    6.50 
   8  -8  -1  109.79    5.10 
  -8   8   1  104.09    7.00 
   8   8  -1  107.19    5.10 
  -7  -8   1    7.90    2.60 
   7  -8  -1    8.30    1.20 
  -7  -8   1    7.50    2.40 
   7  -8  -1    5.80    1.30 
   7   8  -1    8.00    1.20 
  -7   8   1   12.50    3.20 
  -6  -8   1  102.79    5.60 
  -6  -8   1  107.39    6.00 
   6  -8  -1  108.49    4.90 
   6  -8  -1  105.69    4.90 
  -6   8   1  113.29    6.20 
  -6   8   1  101.49    4.80 
   6   8  -1  105.79    4.90 
  -5  -8   1   29.10    2.90 
   5  -8  -1   32.10    1.90 
   5  -8  -1   32.20    1.90 
  -5  -8   1   30.90    2.80 
   5   8  -1   32.40    1.90 
  -5   8   1   35.60    3.10 
   4  -8  -1   93.59    4.80 
   4  -8  -1  110.29    4.80 
  -4  -8   1  108.59    5.70 
   4  -8  -1  107.59    4.80 
  -4  -8   1   99.39    5.40 
   4   8  -1  107.59    4.70 
  -4   8   1  112.99    5.70 
  -3  -8   1   70.69    3.90 
  -3  -8   1   62.09    3.90 
   3  -8  -1   67.39    3.80 
   3  -8  -1   60.49    3.00 
   3  -8  -1   61.69    3.30 
   3  -8  -1   63.29    3.10 
   3   8  -1   64.79    3.10 
   2  -8  -1    8.20    0.90 
  -2  -8   1    9.10    2.00 
   2  -8  -1    8.80    0.90 
   2  -8  -1    6.90    1.50 
   2  -8  -1    9.00    1.60 
  -2  -8   1    9.30    1.70 
   2   8  -1   10.30    1.00 
   1  -8  -1  154.08    6.70 
   1  -8  -1  139.59    6.30 
  -1  -8   1  144.89    6.90 
   1  -8  -1  138.29    6.20 
  -1  -8   1  162.18    7.00 
  -1  -8   1  135.89    6.10 
   1  -8  -1  144.49    6.90 
   1   8  -1  148.29    6.30 
   0  -8  -1  258.17   11.10 
   0  -8   1  263.77   11.20 
   0  -8  -1  259.67   11.30 
   0  -8   1  243.68   10.60 
   0  -8  -1  258.57   10.60 
   0  -8  -1  248.28   10.70 
   0  -8   1  271.57   11.20 
   0  -8   1  248.38   10.80 
  -1  -8  -1   92.19    4.60 
  -1  -8  -1   87.59    4.80 
  -1  -8  -1   90.09    3.90 
   1  -8   1   82.49    4.00 
   1  -8   1   95.29    4.60 
   1  -8   1   86.29    4.10 
   1  -8   1   95.49    4.60 
   1   8   1   92.49    4.00 
  -2  -8  -1   71.29    4.00 
   2  -8   1   79.49    3.90 
  -2  -8  -1   70.09    3.10 
   2  -8   1   77.59    3.90 
  -2  -8  -1   68.39    4.10 
   2  -8   1   69.39    3.40 
   2  -8   1   67.69    3.30 
   2   8   1   72.09    3.30 
   3  -8   1    3.40    0.80 
   3  -8   1    3.10    0.80 
  -3  -8  -1    2.20    0.90 
   3  -8   1    4.00    0.90 
  -3  -8  -1    2.70    0.80 
   3   8   1    3.80    0.70 
  -3   8  -1    2.50    0.80 
  -4  -8  -1  239.58   11.30 
   4  -8   1  230.18   10.80 
  -4  -8  -1  258.07   11.80 
   4  -8   1  268.27   10.90 
   4   8   1  267.27   10.80 
  -4   8  -1  276.37   11.70 
  -5  -8  -1    7.70    2.00 
   5  -8   1    8.80    1.10 
   5  -8   1    8.40    1.10 
  -5  -8  -1    6.30    2.10 
   5  -8   1    4.90    1.30 
  -5   8  -1    8.40    2.20 
   5   8   1    8.70    1.00 
   6  -8   1   72.39    3.60 
   6  -8   1   74.59    3.70 
  -6  -8  -1   63.89    4.30 
  -6  -8  -1   71.49    4.80 
  -6   8  -1   78.79    5.00 
   6   8   1   75.09    3.60 
  -7  -8  -1   81.29    5.40 
   7  -8   1   86.89    4.20 
  -7  -8  -1   75.19    4.80 
   7   8   1   87.39    4.10 
  -7   8  -1   84.69    5.90 
   8  -8   1   64.69    3.50 
   8  -8   1   65.99    3.50 
  -8  -8  -1   60.19    5.00 
  -8  -8  -1   59.39    4.20 
   8   8   1   65.79    3.50 
  -8   8  -1   67.29    5.90 
   9  -8   1    5.30    1.10 
   9  -8   1    4.90    1.10 
  -9  -8  -1    4.00    1.30 
  -9  -8  -1    9.10    3.50 
  -9   8  -1    3.60    1.70 
   9   8   1    8.50    1.50 
  10  -8   1   66.39    3.80 
  10  -8   1   74.99    3.90 
 -10  -8  -1   72.49    4.70 
 -10  -8  -1   66.09    6.00 
  10   8   1   66.19    3.80 
 -10   8  -1   62.99    6.10 
  11  -8   1   20.30    2.30 
  11  -8   1   17.80    2.10 
 -11  -8  -1   24.20    5.00 
  11   8   1   22.20    2.20 
 -11   8  -1   16.80    4.70 
  11   8   1   15.80    3.00 
 -12  -8  -1    1.10    1.90 
  12  -8   1   -0.10    1.00 
  12  -8   1    0.70    1.00 
 -12   8  -1   -0.10    1.60 
  12   8   1    0.10    1.00 
  13  -8   1    3.00    1.20 
  13  -8   1    4.30    1.30 
 -13  -8  -1    1.90    2.40 
  13   8   1    4.00    1.30 
 -13   8  -1    1.60    1.70 
 -14  -8  -1    1.00    2.50 
  14   8   1    0.40    1.20 
 -14   8  -1   -0.40    1.20 
 -15  -8  -1   44.00    7.00 
  15  -9  -1    1.40    1.30 
  15  -9  -1    4.90    1.60 
 -15   9   1    1.20    2.10 
  15   9  -1    4.30    1.60 
 -14  -9   1   58.79    7.60 
  14  -9  -1   61.69    4.00 
  14  -9  -1   55.69    3.70 
 -14   9   1   39.50    6.70 
  14   9  -1   58.59    4.00 
  13  -9  -1    0.70    1.10 
 -13  -9   1    5.30    2.70 
  13  -9  -1    3.70    1.30 
 -13   9   1   -0.60    1.90 
  13   9  -1    2.10    1.20 
  12  -9  -1    3.80    1.10 
 -12  -9   1    4.90    2.30 
  12  -9  -1    5.30    1.30 
 -12   9   1    0.20    1.90 
  12   9  -1    3.90    1.30 
  11  -9  -1    4.20    1.10 
 -11  -9   1   12.30    2.80 
 -11  -9   1    4.50    2.00 
  11  -9  -1    4.70    1.10 
 -11   9   1    0.10    1.70 
  11   9  -1    4.10    1.20 
  10  -9  -1   61.99    3.60 
 -10  -9   1   71.29    6.20 
 -10  -9   1   62.49    4.50 
  10  -9  -1   67.59    3.70 
 -10   9   1   59.19    6.40 
  10   9  -1   61.69    3.70 
  -9  -9   1   31.90    3.40 
   9  -9  -1   38.80    2.60 
  -9  -9   1   30.90    4.50 
   9  -9  -1   35.40    2.40 
  -9   9   1   32.40    5.10 
   9   9  -1   38.00    2.60 
  -8  -9   1  132.49    8.00 
   8  -9  -1  142.19    6.50 
   8  -9  -1  146.29    6.50 
  -8  -9   1  132.19    7.20 
  -8   9   1  140.29    8.40 
   8   9  -1  150.48    6.50 
   7  -9  -1    1.00    0.70 
  -7  -9   1    1.10    1.10 
  -7  -9   1   -0.10    0.90 
   7  -9  -1    1.20    0.70 
   7   9  -1    1.80    0.70 
  -7   9   1    2.60    1.20 
   6  -9  -1  370.96   15.40 
  -6  -9   1  341.07   16.00 
   6  -9  -1  369.06   15.40 
  -6  -9   1  360.56   16.60 
   6   9  -1  378.56   15.40 
  -6   9   1  387.66   16.70 
  -5  -9   1  222.98   10.80 
   5  -9  -1  215.18   10.10 
  -5  -9   1  242.68   11.30 
   5  -9  -1  243.48   10.20 
   5  -9  -1  250.07   10.20 
   5   9  -1  242.78   10.20 
  -5   9   1  257.57   11.30 
   4  -9  -1    1.60    0.60 
   4  -9  -1    1.00    0.50 
  -4  -9   1    2.10    1.00 
  -4  -9   1    1.30    0.80 
   4  -9  -1    1.30    0.60 
   4   9  -1    1.90    0.50 
  -4   9   1    1.20    0.80 
   3  -9  -1  111.89    5.20 
  -3  -9   1  117.29    6.00 
   3  -9  -1  116.59    5.40 
  -3  -9   1  117.49    5.90 
   3  -9  -1  112.59    5.10 
   3  -9  -1  118.09    5.90 
   3   9  -1  116.19    5.20 
   2  -9  -1   11.60    1.00 
  -2  -9   1   12.80    2.00 
  -2  -9   1   11.50    2.20 
   2  -9  -1   11.00    1.80 
   2  -9  -1   10.30    1.70 
   2  -9  -1   10.00    1.00 
   2   9  -1   11.80    1.10 
  -1  -9   1  105.59    5.40 
  -1  -9   1   97.39    4.50 
   1  -9  -1  102.89    4.60 
   1  -9  -1  103.79    5.40 
   1  -9  -1  115.09    5.20 
   1  -9  -1   97.59    4.60 
   1   9  -1  110.19    4.70 
   0  -9   1  262.47   11.20 
   0  -9  -1  245.88   11.30 
   0  -9  -1  253.47   10.50 
   0  -9   1  233.68   10.50 
   0  -9   1  288.27   11.30 
   0  -9  -1  240.08   10.60 
   0  -9  -1  263.57   11.10 
   0  -9   1  238.18   10.70 
  -1  -9  -1  118.69    5.60 
   1  -9   1  116.69    5.50 
  -1  -9  -1  105.49    5.60 
  -1  -9  -1  102.29    4.60 
   1  -9   1  109.09    5.40 
   1  -9   1   99.49    4.70 
   1  -9   1  106.19    4.90 
   1   9   1  112.59    4.80 
  -2  -9  -1   12.60    0.90 
   2  -9   1   14.00    1.30 
  -2  -9  -1   18.70    2.20 
  -2  -9  -1   15.50    2.30 
   2  -9   1   11.70    2.00 
   2  -9   1   15.30    1.80 
   2  -9   1   15.80    1.20 
   2   9   1   14.60    1.10 
  -3  -9  -1    6.50    2.00 
  -3  -9  -1    6.60    2.00 
   3  -9   1    7.80    1.70 
   3  -9   1    7.00    1.80 
   3  -9   1    8.80    1.10 
   3  -9   1    6.50    1.00 
   3   9   1    7.90    0.90 
  -4  -9  -1   54.89    3.90 
   4  -9   1   54.19    2.80 
   4  -9   1   48.30    3.00 
   4  -9   1   52.69    2.70 
  -4  -9  -1   50.39    3.50 
  -4   9  -1   54.59    3.60 
   4   9   1   53.99    2.70 
   5  -9   1    7.00    1.10 
   5  -9   1    7.10    1.10 
  -5  -9  -1    3.60    1.10 
  -5  -9  -1    4.00    1.10 
   5  -9   1    3.20    0.80 
   5   9   1    6.70    1.00 
  -5   9  -1    7.40    2.30 
   6  -9   1   55.99    3.10 
   6  -9   1   61.39    3.20 
  -6  -9  -1   49.40    3.90 
  -6  -9  -1   59.39    4.50 
   6   9   1   60.69    3.10 
  -6   9  -1   60.39    4.50 
  -7  -9  -1    0.50    1.00 
   7  -9   1    1.30    0.70 
   7  -9   1    0.50    0.70 
  -7  -9  -1   -0.90    0.90 
   7   9   1   -0.10    0.60 
  -7   9  -1    0.20    1.20 
  -8  -9  -1  105.09    6.10 
  -8  -9  -1  111.99    7.10 
   8  -9   1  119.99    5.50 
   8  -9   1  114.59    5.40 
   8   9   1  114.79    5.40 
  -8   9  -1  103.69    7.30 
  -9  -9  -1   79.99    5.10 
  -9  -9  -1   80.79    6.20 
   9  -9   1   87.39    4.40 
   9  -9   1   82.59    4.30 
  -9   9  -1   70.09    6.50 
   9   9   1   80.99    4.30 
 -10  -9  -1   16.80    3.20 
 -10  -9  -1   11.70    4.50 
  10  -9   1   12.70    2.00 
  10  -9   1   13.20    1.80 
  10   9   1   13.10    1.80 
  11  -9   1    4.10    1.10 
  11  -9   1    5.00    1.30 
 -11  -9  -1   14.50    4.70 
  11   9   1    3.00    1.40 
 -11   9  -1    1.40    1.70 
  11   9   1    3.50    1.10 
  12  -9   1    8.60    1.90 
 -12  -9  -1    8.70    2.70 
  12  -9   1   16.00    2.40 
  12   9   1    9.40    2.90 
  12   9   1   10.00    2.00 
  13  -9   1    3.70    1.30 
  13  -9   1    2.30    1.20 
 -13  -9  -1    6.30    2.70 
  13   9   1    3.10    1.30 
 -13   9  -1    1.00    1.80 
  14  -9   1    0.50    1.20 
 -14   9  -1   -0.40    1.30 
 -14   9  -1    0.60    1.80 
  14   9   1    1.30    1.30 
  15  -9   1   17.80    2.60 
  15   9   1   20.60    2.90 
 -15   9  -1   20.70    3.20 
  15 -10  -1   19.20    2.90 
  15 -10  -1   14.70    2.50 
  15  10  -1   18.00    2.80 
  14 -10  -1    5.30    1.60 
  14 -10  -1    5.80    1.50 
 -14  10   1    0.90    2.30 
  14  10  -1    8.40    1.70 
  13 -10  -1   19.60    2.40 
 -13 -10   1   28.10    6.20 
  13 -10  -1   23.00    2.70 
  13  10  -1   20.80    2.60 
  12 -10  -1    6.90    1.40 
 -12 -10   1    6.70    2.60 
  12 -10  -1    9.40    2.20 
  12  10  -1    5.60    1.40 
  11 -10  -1   91.09    4.80 
 -11 -10   1   96.79    5.90 
  11 -10  -1   95.79    5.00 
 -11 -10   1   94.09    7.40 
 -11  10   1   76.09    7.40 
  11  10  -1   89.89    4.90 
  10 -10  -1    1.20    1.00 
  10 -10  -1   -0.30    0.80 
 -10 -10   1    1.30    1.20 
 -10 -10   1    1.50    1.50 
  10  10  -1    0.90    0.90 
 -10  10   1   -1.30    1.70 
   9 -10  -1   39.70    2.70 
  -9 -10   1   40.60    3.80 
   9 -10  -1   43.20    2.80 
  -9 -10   1   35.60    4.80 
   9  10  -1   44.10    2.80 
  -9  10   1   38.60    5.40 
  -8 -10   1   20.70    3.80 
   8 -10  -1   19.10    1.90 
  -8 -10   1   16.80    3.00 
   8 -10  -1   17.80    1.80 
  -8  10   1   15.40    3.90 
   8  10  -1   21.00    1.90 
   7 -10  -1   80.59    4.00 
  -7 -10   1   77.79    5.60 
   7 -10  -1   79.29    4.10 
  -7 -10   1   73.29    4.90 
   7  10  -1   82.79    4.10 
  -7  10   1   83.99    5.80 
  -6 -10   1    0.20    1.10 
  -6 -10   1    0.00    0.90 
   6 -10  -1    0.00    0.70 
   6 -10  -1    0.40    0.60 
  -6  10   1    0.90    1.00 
   6  10  -1    0.40    0.60 
   5 -10  -1    8.50    1.20 
   5 -10  -1    7.40    1.20 
   5 -10  -1    8.90    1.50 
  -5 -10   1    8.00    2.50 
  -5 -10   1    5.70    1.40 
   5  10  -1    7.60    1.10 
  -5  10   1    8.50    2.40 
   4 -10  -1   44.40    2.40 
   4 -10  -1   41.00    2.70 
  -4 -10   1   46.90    3.60 
  -4 -10   1   45.70    3.60 
   4 -10  -1   42.20    2.40 
   4  10  -1   44.10    2.40 
   3 -10  -1    2.30    0.80 
   3 -10  -1    2.10    0.80 
   3 -10  -1    3.30    0.70 
  -3 -10   1    1.90    0.80 
  -3 -10   1    2.40    1.10 
   3 -10  -1    2.30    0.60 
   3  10  -1    3.50    0.70 
   2 -10  -1   46.60    3.00 
  -2 -10   1   47.80    3.30 
   2 -10  -1   47.70    3.20 
  -2 -10   1   45.50    3.40 
   2 -10  -1   45.10    2.40 
   2 -10  -1   45.00    2.40 
   2  10  -1   46.30    2.50 
  -1 -10   1   32.20    2.90 
  -1 -10   1   27.70    1.60 
   1 -10  -1   29.90    2.60 
   1 -10  -1   28.70    1.70 
   1 -10  -1   29.10    2.60 
  -1 -10   1   29.40    2.60 
   1 -10  -1   28.00    1.80 
   1  10  -1   27.90    1.80 
   0 -10   1   40.00    3.10 
   0 -10  -1   40.70    3.00 
   0 -10  -1   36.60    2.00 
   0 -10   1   41.10    2.90 
   0 -10  -1   43.50    3.00 
   0 -10   1   38.50    2.20 
   0 -10   1   34.10    2.00 
   0  10   1   38.30    2.10 
  -1 -10  -1   24.40    1.40 
   1 -10   1   25.00    1.60 
   1 -10   1   26.20    2.30 
   1 -10   1   25.70    2.60 
  -1 -10  -1   27.90    2.70 
  -1 -10  -1   27.40    2.60 
   1 -10   1   26.50    1.80 
   1  10   1   27.40    1.60 
   2 -10   1    2.00    0.60 
  -2 -10  -1    1.30    0.80 
  -2 -10  -1    1.00    0.90 
   2 -10   1    0.80    0.90 
   2 -10   1    1.20    0.60 
   2 -10   1    2.20    0.70 
  -2 -10  -1    1.60    0.40 
   2  10   1    1.90    0.50 
   3 -10   1   -0.10    0.60 
   3 -10   1   -0.10    0.80 
   3 -10   1    0.10    0.50 
   3 -10   1   -0.20    0.50 
  -3 -10  -1    0.00    0.90 
  -3 -10  -1   -0.30    0.70 
   3  10   1   -0.30    0.40 
  -4 -10  -1   -0.60    0.90 
  -4 -10  -1   -0.40    0.70 
   4 -10   1   -0.10    0.60 
   4 -10   1    0.20    0.80 
   4 -10   1   -0.40    0.50 
   4  10   1   -0.20    0.50 
  -4  10  -1    0.00    0.70 
  -5 -10  -1    4.20    1.20 
   5 -10   1    7.00    1.70 
  -5 -10  -1    4.60    1.30 
   5 -10   1    6.90    1.20 
   5 -10   1    6.30    1.20 
   5  10   1    9.20    1.10 
  -5  10  -1    9.70    2.50 
   6 -10   1   25.60    2.00 
   6 -10   1   26.20    2.00 
  -6 -10  -1   21.60    3.10 
  -6 -10  -1   24.10    3.40 
   6  10   1   28.30    1.90 
  -6  10  -1   27.50    3.50 
   7 -10   1   28.10    2.10 
  -7 -10  -1   24.50    3.80 
   7 -10   1   31.00    2.20 
  -7 -10  -1   27.20    3.20 
   7  10   1   28.30    2.10 
  -7  10  -1   24.60    3.90 
  -8 -10  -1   19.60    3.90 
   8 -10   1   16.00    1.90 
   8 -10   1   14.30    1.80 
  -8 -10  -1   16.60    3.10 
   8  10   1   17.10    1.80 
  -9 -10  -1   83.99    6.70 
  -9 -10  -1   86.29    5.60 
   9 -10   1   96.29    4.70 
   9 -10   1   87.29    4.60 
  -9  10  -1   81.79    7.10 
   9  10   1   86.29    4.60 
 -10 -10  -1   12.50    3.20 
  10 -10   1    9.30    1.90 
  10 -10   1    6.30    1.30 
 -10 -10  -1    5.60    2.00 
 -10  10  -1    3.50    1.90 
  10  10   1    5.80    1.20 
  11 -10   1   38.70    2.90 
  11 -10   1   44.20    3.20 
 -11 -10  -1   44.70    6.20 
  11  10   1   37.30    4.10 
 -11  10  -1   28.20    5.50 
  11  10   1   41.40    3.00 
  12 -10   1    2.60    1.20 
  12 -10   1    1.00    1.30 
 -12 -10  -1    4.70    2.60 
  12  10   1    3.80    1.30 
  12  10   1    1.80    1.30 
 -12  10  -1    1.20    2.00 
  13 -10   1    1.50    1.20 
  13 -10   1    2.60    1.40 
 -13 -10  -1    5.00    2.70 
 -13  10  -1   -0.90    2.00 
  13  10   1    1.40    1.20 
  14 -10   1    8.90    1.70 
 -14  10  -1    4.60    2.30 
  14  10   1   12.70    2.50 
 -14  10  -1    8.90    2.00 
  14 -11  -1   13.10    2.70 
  14 -11  -1    9.10    1.80 
  14  11  -1    9.20    1.80 
 -13 -11   1    5.20    2.80 
  13 -11  -1    1.70    1.20 
  13 -11  -1    3.90    1.50 
  13  11  -1   -0.50    2.40 
  13  11  -1    3.00    1.40 
 -13  11   1   -1.30    2.20 
  12 -11  -1   11.20    2.10 
 -12 -11   1   14.60    5.80 
  12 -11  -1   13.30    2.50 
 -12 -11   1   23.00    4.10 
  12  11  -1   11.90    2.30 
  11 -11  -1    5.80    1.30 
  11 -11  -1    6.00    1.40 
 -11 -11   1    4.30    2.20 
 -11 -11   1   16.20    3.60 
  11  11  -1    6.20    1.40 
  10 -11  -1    5.70    1.30 
 -10 -11   1    4.70    2.00 
 -10 -11   1   11.10    3.30 
  10 -11  -1    4.80    1.20 
 -10  11   1    2.10    2.00 
  10  11  -1    5.70    1.30 
   9 -11  -1   23.00    2.30 
   9 -11  -1   22.90    2.00 
  -9 -11   1   28.40    4.90 
  -9 -11   1   21.10    3.50 
  -9  11   1   15.30    4.60 
   9  11  -1   22.80    2.20 
   8 -11  -1    4.70    1.10 
   8 -11  -1    4.30    1.00 
  -8 -11   1    2.60    1.50 
  -8 -11   1    1.60    1.30 
   8  11  -1    3.10    1.00 
  -8  11   1    1.00    1.40 
   7 -11  -1  113.29    5.30 
   7 -11  -1  108.39    5.30 
  -7 -11   1  105.79    7.00 
  -7 -11   1  102.09    6.10 
   7  11  -1  115.89    5.30 
  -7  11   1  110.69    7.00 
   6 -11  -1  166.28    7.30 
   6 -11  -1  157.08    7.30 
  -6 -11   1  159.78    8.20 
  -6 -11   1  160.78    8.80 
  -6  11   1  165.68    8.80 
   6  11  -1  167.98    7.30 
  -5 -11   1   25.70    3.20 
   5 -11  -1   28.80    2.00 
   5 -11  -1   24.00    1.90 
  -5 -11   1   28.70    3.50 
   5 -11  -1   27.50    2.20 
   5  11  -1   28.20    1.90 
  -5  11   1   28.80    3.30 
   4 -11  -1  128.89    6.70 
   4 -11  -1  120.49    6.00 
  -4 -11   1  131.79    7.00 
  -4 -11   1  129.39    6.80 
   4 -11  -1  118.39    5.70 
   4 -11  -1  127.49    5.70 
   4  11  -1  126.69    5.70 
  -3 -11   1   -0.40    1.10 
  -3 -11   1    0.30    0.80 
   3 -11  -1   -0.10    0.50 
   3 -11  -1   -0.10    0.80 
   3 -11  -1   -0.70    0.50 
   3 -11  -1   -0.20    0.70 
   3  11  -1    0.00    0.60 
  -2 -11   1  114.19    5.90 
   2 -11  -1  107.09    5.00 
   2 -11  -1  114.29    5.90 
  -2 -11   1  111.39    6.00 
   2 -11  -1  104.09    5.60 
   2 -11  -1  103.29    4.90 
   2  11  -1  114.89    5.10 
  -1 -11   1   43.10    2.40 
   1 -11  -1   48.90    2.60 
  -1 -11   1   49.20    3.50 
   1 -11  -1   47.80    2.50 
  -1 -11   1   57.49    3.70 
   1 -11  -1   52.59    3.50 
   1 -11  -1   48.80    3.50 
   1  11  -1   48.20    2.60 
   0 -11   1  106.49    5.60 
   0 -11  -1  110.29    5.80 
   0 -11   1  104.39    5.00 
   0 -11   1   99.59    4.70 
   0 -11  -1  108.59    5.70 
   0 -11   1  116.89    5.70 
   0 -11  -1   99.59    4.70 
   0  11   1  107.29    4.80 
   1 -11   1    5.40    1.10 
  -1 -11  -1    2.80    0.90 
  -1 -11  -1    2.90    1.10 
   1 -11   1    2.90    0.70 
   1 -11   1    2.50    1.20 
  -1 -11  -1    3.00    0.60 
   1 -11   1    2.40    0.80 
   1  11   1    3.60    0.70 
  -2 -11  -1    1.50    0.90 
  -2 -11  -1    0.40    0.40 
   2 -11   1    0.00    0.60 
   2 -11   1    1.30    0.70 
   2 -11   1    0.20    0.60 
   2 -11   1    0.60    1.00 
  -2 -11  -1    0.60    1.00 
   2  11   1    0.40    0.50 
   3 -11   1   82.49    4.10 
   3 -11   1   79.79    4.00 
  -3 -11  -1   87.19    5.30 
   3 -11   1   88.99    4.70 
   3 -11   1   82.79    4.80 
  -3 -11  -1   84.99    5.00 
   3  11   1   81.89    4.00 
   4 -11   1   86.09    4.20 
  -4 -11  -1   88.49    5.10 
   4 -11   1   82.39    4.60 
  -4 -11  -1   84.79    5.50 
   4 -11   1   81.99    4.20 
  -4  11  -1   89.19    5.20 
   4  11   1   88.19    4.10 
  -5 -11  -1    0.40    1.10 
  -5 -11  -1    0.70    1.00 
   5 -11   1    1.20    0.90 
   5 -11   1    1.60    0.80 
   5 -11   1    0.80    0.70 
  -5  11  -1    1.30    1.00 
   5  11   1    1.50    0.70 
   6 -11   1   18.10    1.80 
  -6 -11  -1   18.30    2.90 
   6 -11   1   18.00    1.80 
  -6 -11  -1   16.10    3.50 
  -6  11  -1   17.90    3.40 
   6  11   1   19.30    1.70 
   7 -11   1    7.20    1.60 
   7 -11   1    7.10    1.50 
  -7 -11  -1    8.70    2.70 
  -7 -11  -1    4.70    1.60 
   7  11   1    8.40    1.40 
  -7  11  -1    4.60    1.60 
  -8 -11  -1    0.50    1.20 
   8 -11   1    0.60    0.80 
   8 -11   1    1.00    1.00 
  -8 -11  -1    0.00    1.40 
  -8  11  -1   -1.10    1.40 
   8  11   1    1.50    0.90 
  -9 -11  -1   12.20    4.70 
   9 -11   1   11.60    1.80 
  -9 -11  -1   13.80    3.40 
   9 -11   1   10.00    1.90 
   9  11   1    8.20    1.80 
 -10 -11  -1    5.80    2.20 
  10 -11   1    9.20    2.20 
  10 -11   1    7.70    1.70 
 -10 -11  -1   12.50    3.60 
  10  11   1    6.10    1.30 
 -10  11  -1    1.70    1.90 
 -11 -11  -1   13.20    5.00 
  11 -11   1    7.60    1.80 
  11 -11   1    7.60    1.60 
  11  11   1   10.60    2.00 
  11  11   1    3.40    1.60 
  12 -11   1    1.90    1.30 
 -12 -11  -1    1.00    2.20 
  12 -11   1   -0.10    1.10 
  12  11   1    1.80    1.20 
 -12  11  -1   -2.70    1.90 
  12  11   1    0.10    1.40 
  13 -11   1   40.70    3.30 
  13 -11   1   51.29    3.80 
 -13 -11  -1   53.89    7.30 
 -13  11  -1   30.70    6.60 
  13  11   1   43.60    3.50 
  14 -11   1    7.20    1.70 
 -14 -11  -1   18.90    6.70 
 -14  11  -1    8.90    2.10 
  14  11   1   11.70    2.50 
 -14 -12   1   24.70    7.10 
  14 -12  -1   23.80    3.20 
  14 -12  -1   19.30    2.70 
  14  12  -1   21.90    2.90 
  13 -12  -1    0.10    1.10 
  13 -12  -1    2.40    1.50 
  13  12  -1    0.90    1.30 
 -13  12   1   -2.80    2.20 
  13  12  -1   -0.30    1.50 
  12 -12  -1    9.40    2.00 
  12 -12  -1   14.10    2.60 
 -12 -12   1   17.60    5.50 
  12  12  -1    6.70    1.60 
 -12  12   1    3.50    2.40 
  11 -12  -1   36.00    3.10 
  11 -12  -1   32.60    2.70 
 -11 -12   1   41.30    6.40 
 -11 -12   1   42.10    4.70 
  11  12  -1   32.10    2.90 
 -11  12   1   21.60    6.00 
  10 -12  -1   89.79    4.90 
 -10 -12   1   93.09    6.20 
  10 -12  -1   86.69    4.70 
 -10 -12   1   91.69    7.80 
 -10  12   1   72.09    7.60 
  10  12  -1   90.99    4.90 
  -9 -12   1   22.30    3.60 
   9 -12  -1   21.40    2.40 
   9 -12  -1   23.70    2.10 
  -9 -12   1   23.80    5.20 
   9  12  -1   18.80    2.10 
  -9  12   1   14.90    4.60 
  -8 -12   1   16.40    3.50 
   8 -12  -1   14.10    1.80 
  -8 -12   1   14.00    4.50 
   8 -12  -1   18.40    2.10 
   8  12  -1   13.10    1.80 
  -7 -12   1    3.00    1.40 
   7 -12  -1    4.00    1.10 
   7 -12  -1    3.20    0.90 
  -7 -12   1    3.10    1.50 
   7  12  -1    4.50    1.00 
  -7  12   1    1.40    1.40 
  -6 -12   1   11.40    3.00 
   6 -12  -1   10.80    1.60 
   6 -12  -1   10.20    1.50 
  -6 -12   1   10.30    3.70 
  -6  12   1    9.70    3.20 
   6  12  -1    9.50    1.50 
   5 -12  -1    0.90    0.80 
  -5 -12   1    0.40    1.00 
   5 -12  -1    1.10    0.80 
   5 -12  -1    0.50    0.80 
  -5 -12   1    1.20    1.20 
   5  12  -1    0.20    0.70 
  -5  12   1    0.60    1.00 
   4 -12  -1  275.37   11.80 
  -4 -12   1  282.87   12.50 
  -4 -12   1  280.77   12.80 
   4 -12  -1  263.67   11.50 
   4 -12  -1  265.17   12.40 
   4 -12  -1  253.37   11.50 
   4  12  -1  261.97   11.50 
   3 -12  -1   78.59    4.00 
   3 -12  -1   83.19    4.60 
   3 -12  -1   79.79    4.00 
   3 -12  -1   85.19    5.00 
  -3 -12   1   84.89    5.30 
  -3 -12   1   78.09    5.20 
   3  12  -1   82.19    4.00 
  -2 -12   1   40.70    3.50 
   2 -12  -1   37.30    2.30 
   2 -12  -1   37.30    3.20 
  -2 -12   1   38.40    3.70 
   2 -12  -1   38.80    3.30 
   2 -12  -1   36.50    2.20 
   2  12  -1   39.10    2.40 
   2  12  -1   42.50    2.10 
  -1 -12   1   79.69    4.70 
   1 -12  -1   69.39    3.50 
   1 -12  -1   71.09    4.50 
  -1 -12   1   73.69    4.80 
   1 -12  -1   74.29    3.70 
  -1 -12   1   71.79    3.50 
   1 -12  -1   80.09    4.70 
   1  12  -1   76.19    3.70 
   0 -12  -1   74.69    4.70 
   0 -12   1   69.59    3.50 
   0 -12   1   74.39    4.50 
   0 -12   1   78.09    4.70 
   0 -12  -1   69.69    3.40 
   0 -12   1   70.89    3.70 
   0 -12  -1   74.59    4.60 
   0  12   1   73.09    3.60 
   1 -12   1  186.38    8.60 
  -1 -12  -1  168.88    7.40 
  -1 -12  -1  180.98    8.60 
  -1 -12  -1  172.98    8.70 
   1 -12   1  167.38    7.60 
   1 -12   1  173.68    7.80 
   1 -12   1  180.58    8.50 
   1  12   1  177.68    7.70 
   2 -12   1    0.00    0.60 
   2 -12   1   -0.70    0.70 
   2 -12   1   -0.10    1.10 
  -2 -12  -1   -1.30    1.00 
  -2 -12  -1    0.00    0.80 
   2 -12   1    0.10    0.70 
   2  12   1   -0.30    0.50 
   3 -12   1    0.70    1.10 
   3 -12   1   -0.20    0.70 
   3 -12   1    0.00    0.70 
  -3 -12  -1   -0.50    1.00 
  -3 -12  -1   -0.40    0.90 
   3 -12   1   -0.50    0.60 
   3  12   1    0.20    0.50 
  -4 -12  -1   30.00    3.40 
   4 -12   1   32.70    2.30 
   4 -12   1   30.40    2.20 
  -4 -12  -1   32.60    3.80 
   4 -12   1   29.90    2.70 
  -4  12  -1   35.10    3.40 
   4  12   1   30.90    2.00 
   5 -12   1    1.60    0.80 
  -5 -12  -1    1.90    1.20 
  -5 -12  -1    0.00    1.10 
   5 -12   1    1.30    0.80 
   5  12   1    2.10    0.80 
  -5  12  -1    0.40    1.00 
  -6 -12  -1  147.99    7.60 
  -6 -12  -1  137.39    8.40 
   6 -12   1  139.09    6.60 
   6 -12   1  136.19    6.50 
  -6  12  -1  136.59    8.00 
   6  12   1  143.09    6.50 
   7 -12   1    2.10    1.00 
  -7 -12  -1    1.10    1.30 
  -7 -12  -1    1.60    1.50 
   7 -12   1    2.10    1.00 
  -7  12  -1    0.30    1.30 
   7  12   1    2.20    0.90 
  -8 -12  -1    3.70    1.80 
   8 -12   1    3.30    1.00 
  -8 -12  -1    3.70    1.50 
   8 -12   1    4.20    1.20 
  -8  12  -1    1.60    1.60 
   8  12   1    3.60    1.00 
  -9 -12  -1    6.00    2.30 
   9 -12   1    7.60    1.50 
   9 -12   1    6.30    1.30 
  -9 -12  -1   12.00    3.80 
   9  12   1    8.80    1.80 
 -10 -12  -1   67.49    5.30 
  10 -12   1   54.99    3.80 
 -10 -12  -1   58.99    6.80 
  10 -12   1   53.89    3.50 
 -10  12  -1   38.20    6.10 
  10  12   1   53.49    3.50 
  11 -12   1   11.40    2.40 
  11 -12   1    8.10    1.90 
 -11 -12  -1    8.90    2.90 
  11  12   1   10.00    2.10 
  11  12   1    5.30    1.80 
 -12 -12  -1    4.40    2.80 
  12 -12   1    2.90    1.40 
  12 -12   1    0.00    1.10 
  12  12   1    0.90    1.50 
  12  12   1    0.60    1.10 
  12 -13  -1    4.70    1.60 
  12 -13  -1    3.60    1.30 
 -12  13   1   -0.40    2.30 
  12  13  -1    3.50    1.40 
 -11 -13   1   51.69    5.20 
  11 -13  -1   34.10    2.90 
  11 -13  -1   37.30    3.30 
 -11 -13   1   43.10    6.80 
 -11  13   1   23.10    6.40 
  11  13  -1   35.10    3.10 
 -10 -13   1    1.40    2.40 
 -10 -13   1    3.70    1.70 
  10 -13  -1    4.00    1.20 
  10 -13  -1    5.10    1.40 
  10  13  -1    3.50    1.20 
 -10  13   1   -0.90    2.00 
   9 -13  -1    2.40    1.30 
   9 -13  -1    1.20    1.00 
  -9 -13   1    3.40    1.70 
  -9 -13   1    4.40    2.30 
   9  13  -1    3.30    1.10 
  -8 -13   1   16.50    4.90 
   8 -13  -1   17.30    2.00 
   8 -13  -1   16.30    2.20 
  -8 -13   1   20.90    3.90 
   8  13  -1   18.60    2.00 
  -8  13   1   14.40    4.10 
  -7 -13   1   22.70    5.00 
   7 -13  -1   18.50    2.20 
   7 -13  -1   19.50    2.00 
  -7 -13   1   25.40    3.80 
  -7  13   1   18.10    4.10 
   7  13  -1   23.70    2.10 
  -6 -13   1   11.00    3.80 
  -6 -13   1   13.10    3.20 
   6 -13  -1    8.40    1.70 
   6 -13  -1    8.60    1.50 
  -6  13   1   10.30    3.40 
   6  13  -1   11.10    1.60 
   5 -13  -1    9.40    1.60 
   5 -13  -1    9.80    1.50 
  -5 -13   1   12.80    3.10 
  -5 -13   1    6.80    1.70 
  -5  13   1   11.60    2.90 
   5  13  -1   11.40    1.50 
  -4 -13   1   48.80    4.50 
   4 -13  -1   46.10    3.90 
   4 -13  -1   54.09    3.40 
  -4 -13   1   48.90    4.20 
   4 -13  -1   50.49    2.90 
   4 -13  -1   45.40    2.80 
   4  13  -1   48.90    2.80 
   3 -13  -1    1.20    0.90 
   3 -13  -1    1.70    0.80 
  -3 -13   1    2.00    1.10 
   3 -13  -1    2.20    1.00 
   3 -13  -1    2.30    0.80 
  -3 -13   1    2.40    1.30 
   3  13  -1    1.20    0.70 
  -2 -13   1   27.40    3.40 
  -2 -13   1   27.90    3.30 
   2 -13  -1   25.70    1.90 
   2 -13  -1   24.50    3.00 
   2 -13  -1   26.10    2.90 
   2 -13  -1   22.90    1.90 
   2  13  -1   25.70    2.00 
   1 -13  -1  195.38    8.90 
  -1 -13   1  207.98    9.80 
   1 -13  -1  204.98    9.60 
   1 -13  -1  210.98   10.00 
   1 -13  -1  192.88    8.70 
  -1 -13   1  210.38    9.90 
   1  13  -1  205.28    8.90 
   0 -13   1    4.60    0.80 
   0 -13   1    6.40    2.30 
   0 -13  -1    5.60    1.40 
   0 -13   1    7.30    1.40 
   0 -13  -1    6.70    2.50 
   0 -13  -1    5.80    1.10 
   0 -13   1    3.90    1.50 
   0  13   1    6.90    1.30 
   1 -13   1    7.80    1.30 
   1 -13   1    9.00    2.40 
  -1 -13  -1    6.20    1.50 
  -1 -13  -1   10.60    2.70 
   1 -13   1    9.70    2.80 
   1 -13   1   10.30    1.50 
   1  13   1    7.10    1.30 
  -2 -13  -1    4.40    1.40 
   2 -13   1    5.40    1.20 
  -2 -13  -1    4.10    1.20 
   2 -13   1    6.20    2.20 
   2 -13   1    5.00    1.30 
   2 -13   1    6.30    1.40 
   2  13   1    5.00    1.10 
   3 -13   1   63.09    3.40 
  -3 -13  -1   64.79    5.00 
   3 -13   1   73.09    4.20 
  -3 -13  -1   68.39    4.70 
   3 -13   1   60.89    3.50 
   3 -13   1   63.69    4.30 
   3  13   1   64.69    3.30 
  -4 -13  -1  141.99    7.60 
  -4 -13  -1  151.78    8.40 
   4 -13   1  140.59    6.70 
   4 -13   1  141.19    6.80 
   4 -13   1  150.18    7.10 
   4  13   1  141.89    6.60 
  -4  13  -1  156.88    8.00 
  -5 -13  -1   23.40    3.40 
  -5 -13  -1   20.60    4.20 
   5 -13   1   17.50    1.90 
   5 -13   1   17.70    1.90 
  -5  13  -1   18.20    3.40 
   5  13   1   18.80    1.70 
  -6 -13  -1   16.40    3.30 
  -6 -13  -1   14.40    4.40 
   6 -13   1   12.20    1.80 
   6 -13   1   12.30    1.90 
  -6  13  -1   10.10    3.50 
   6  13   1   15.70    1.70 
   7 -13   1    1.00    1.00 
   7 -13   1    0.90    0.90 
  -7 -13  -1    0.50    1.50 
  -7 -13  -1    2.10    1.50 
   7  13   1    0.10    0.80 
  -7  13  -1   -0.90    1.30 
   8 -13   1   50.49    3.30 
  -8 -13  -1   51.59    6.50 
   8 -13   1   55.69    3.60 
  -8 -13  -1   66.79    5.20 
   8  13   1   56.29    3.40 
  -8  13  -1   44.40    5.60 
   9 -13   1   11.40    1.90 
  -9 -13  -1   17.20    3.80 
   9 -13   1   12.90    2.30 
  -9 -13  -1   14.60    5.60 
   9  13   1    9.90    1.90 
  10 -13   1    0.20    1.10 
  10 -13   1    1.70    1.30 
 -10 -13  -1    2.50    2.40 
 -10  13  -1   -1.20    2.00 
  10  13   1    0.90    1.00 
  11 -13   1    3.50    1.50 
  11 -13   1    0.20    1.10 
  11  13   1   -0.20    1.10 
  11  13   1   -0.20    1.40 
 -11  13  -1   -1.50    2.10 
  12 -13   1   38.20    3.30 
  12 -13   1   50.49    3.80 
  12  13   1   43.40    3.40 
  12  13   1   36.00    4.90 
 -13 -13  -1   41.60    7.50 
  13 -13   1   24.60    2.90 
  13  13   1   29.60    3.10 
 -13  13  -1   26.20    3.60 
  13  13   1   31.00    5.30 
  12 -14  -1   39.70    3.30 
  12 -14  -1   43.40    3.80 
  12  14  -1   38.30    3.40 
  11 -14  -1   13.40    2.20 
  11 -14  -1   17.50    2.80 
  11  14  -1   18.50    2.60 
  10 -14  -1    5.00    1.30 
  10 -14  -1   11.00    2.50 
  10  14  -1    5.40    1.40 
 -10  14   1    0.80    2.30 
   9 -14  -1    1.90    1.10 
  -9 -14   1    0.80    2.20 
   9 -14  -1    3.30    1.40 
  -9 -14   1    6.00    1.90 
   9  14  -1    2.70    1.10 
   8 -14  -1    4.20    1.30 
  -8 -14   1    2.30    2.00 
  -8 -14   1    4.20    1.70 
   8 -14  -1    3.80    1.20 
   8  14  -1    4.70    1.20 
  -8  14   1    2.10    1.80 
  -7 -14   1    8.80    2.20 
   7 -14  -1   13.10    2.10 
   7 -14  -1   13.50    1.80 
  -7 -14   1   20.20    4.00 
   7  14  -1   14.00    1.90 
   6 -14  -1    0.80    1.00 
  -6 -14   1    1.10    1.40 
  -6 -14   1   -0.80    1.30 
   6 -14  -1    0.70    0.80 
  -6  14   1    1.00    1.20 
   6  14  -1    0.70    0.80 
  -5 -14   1   37.70    4.80 
  -5 -14   1   36.10    4.10 
   5 -14  -1   38.00    2.50 
   5 -14  -1   32.80    2.60 
  -5  14   1   38.10    4.20 
   5  14  -1   39.40    2.50 
  -4 -14   1   11.00    3.30 
   4 -14  -1   11.20    1.60 
   4 -14  -1    8.90    2.80 
   4 -14  -1   15.90    2.30 
   4 -14  -1    9.90    1.50 
  -4 -14   1    9.70    3.40 
   4  14  -1    9.30    1.50 
  -3 -14   1    0.10    1.20 
   3 -14  -1    1.30    1.00 
   3 -14  -1    0.00    0.70 
   3 -14  -1   -0.40    0.70 
  -3 -14   1    0.20    1.00 
   3 -14  -1    0.20    0.90 
   3  14  -1    0.10    0.70 
   2 -14  -1   26.30    3.20 
  -2 -14   1   28.50    3.60 
  -2 -14   1   25.30    3.40 
   2 -14  -1   24.80    1.90 
   2 -14  -1   25.40    2.10 
   2 -14  -1   30.10    3.10 
   2  14  -1   27.90    2.00 
   1 -14  -1    9.50    2.60 
   1 -14  -1   12.90    2.80 
  -1 -14   1    9.70    2.90 
  -1 -14   1    9.90    2.70 
   1 -14  -1   10.40    1.30 
   1  14  -1   10.20    1.50 
  -1  14   1   10.20    1.40 
   0 -14  -1    0.30    1.10 
   0 -14  -1    0.90    0.90 
   0 -14  -1    0.40    0.60 
   0 -14   1    2.20    1.30 
   0 -14   1    1.30    0.70 
   0 -14   1    1.20    0.90 
   0  14   1    1.10    0.80 
   0  14  -1    0.60    0.80 
  -1 -14  -1    3.20    1.20 
   1 -14   1    1.70    1.00 
   1 -14   1    3.70    1.30 
  -1 -14  -1    4.00    1.40 
   1 -14   1    4.00    1.00 
   1 -14   1    2.90    0.80 
   1  14   1    4.20    0.90 
   2 -14   1  108.79    5.80 
   2 -14   1  100.19    5.00 
  -2 -14  -1  103.59    6.10 
   2 -14   1  101.39    5.10 
   2 -14   1  107.59    6.00 
  -2 -14  -1  106.79    6.50 
   2  14   1  105.19    4.90 
  -3 -14  -1   -0.10    1.10 
   3 -14   1   -0.80    0.80 
  -3 -14  -1   -0.50    1.10 
   3 -14   1    1.10    1.10 
   3 -14   1    0.20    0.70 
   3  14   1   -0.40    0.60 
   4 -14   1   14.90    1.90 
   4 -14   1   22.40    2.60 
  -4 -14  -1   19.50    3.20 
   4 -14   1   16.10    1.80 
  -4 -14  -1   16.30    4.00 
  -4  14  -1   18.60    3.10 
   4  14   1   15.90    1.60 
   5 -14   1   32.00    2.60 
  -5 -14  -1   34.50    5.00 
   5 -14   1   33.90    2.60 
  -5 -14  -1   43.70    4.20 
   5  14   1   36.90    2.40 
  -5  14  -1   33.00    4.10 
  -6 -14  -1    2.20    1.50 
   6 -14   1    1.10    0.90 
   6 -14   1   -1.20    0.90 
  -6 -14  -1    1.40    1.70 
   6  14   1    0.80    0.80 
  -6  14  -1   -0.30    1.20 
  -7 -14  -1    6.10    2.20 
   7 -14   1    9.20    1.80 
  -7 -14  -1   20.40    4.10 
   7 -14   1   11.30    2.10 
   7  14   1   11.20    1.70 
  -8 -14  -1    5.20    2.40 
   8 -14   1    7.30    1.50 
  -8 -14  -1   19.30    4.20 
   8 -14   1    6.40    1.40 
   8  14   1    6.70    1.30 
  -9 -14  -1   10.80    3.10 
   9 -14   1   12.90    2.50 
   9 -14   1    8.90    2.00 
   9  14   1   14.20    2.20 
  10 -14   1    7.20    1.50 
  10 -14   1   11.30    2.60 
  10  14   1    5.60    1.40 
  10  14   1    3.80    1.80 
 -11 -14  -1   59.69    7.90 
  11 -14   1   57.39    3.90 
  11 -14   1   63.59    4.30 
  11  14   1   51.69    5.60 
  11  14   1   58.49    4.00 
  12 -14   1   15.10    2.90 
  12 -14   1   10.40    2.40 
  12  14   1   13.50    2.50 
  12  14   1    6.50    2.20 
  12 -15  -1    3.20    1.60 
  12  15  -1    2.70    1.40 
  11 -15  -1   30.90    3.40 
 -11 -15   1   37.50    7.60 
  11 -15  -1   24.80    2.80 
  11  15  -1   22.80    2.90 
 -10 -15   1   20.70    4.80 
  10 -15  -1    9.50    2.20 
  10 -15  -1   15.40    2.80 
 -10 -15   1   20.80    6.20 
  10  15  -1    8.30    1.70 
   9 -15  -1    3.50    1.30 
   9 -15  -1    7.20    1.70 
   9  15  -1    5.50    1.40 
   8 -15  -1    0.70    1.20 
   8 -15  -1   -1.40    0.90 
  -8 -15   1    0.60    2.00 
  -8 -15   1    2.20    1.80 
   8  15  -1    0.90    1.10 
  -8  15   1   -2.10    1.50 
  -7 -15   1    0.20    1.80 
   7 -15  -1    0.40    1.10 
  -7 -15   1    3.30    1.70 
   7 -15  -1    0.30    1.00 
  -7  15   1   -1.00    1.40 
   7  15  -1    0.10    0.90 
  -6 -15   1   96.39    6.30 
  -6 -15   1   89.79    7.30 
   6 -15  -1   83.79    4.70 
   6 -15  -1   83.29    4.60 
  -6  15   1   85.79    6.60 
   6  15  -1   86.89    4.60 
   5 -15  -1    4.60    1.10 
  -5 -15   1    2.50    1.60 
  -5 -15   1    3.10    1.60 
   5 -15  -1    1.70    0.90 
   5  15  -1    3.90    1.00 
  -5  15   1    2.20    1.30 
   4 -15  -1   62.59    3.90 
  -4 -15   1   60.09    4.90 
   4 -15  -1   50.19    3.20 
  -4 -15   1   54.59    5.30 
   4 -15  -1   49.80    4.50 
   4 -15  -1   52.69    3.20 
   4  15  -1   56.59    3.20 
   3 -15  -1   16.30    1.70 
  -3 -15   1   12.30    3.40 
   3 -15  -1   13.40    1.70 
  -3 -15   1   18.10    3.60 
   3 -15  -1   13.50    3.00 
   3 -15  -1   19.50    2.70 
   3  15  -1   13.80    1.70 
   2 -15  -1    8.60    1.40 
  -2 -15   1    8.50    3.00 
  -2 -15   1   11.90    3.40 
   2 -15  -1    7.10    1.50 
   2 -15  -1    8.10    2.80 
   2 -15  -1   11.60    2.80 
   2  15  -1    8.60    1.50 
   1 -15  -1   66.39    3.50 
   1 -15  -1   64.59    4.90 
   1 -15  -1   71.59    4.80 
  -1 -15   1   67.19    4.90 
  -1 -15   1   72.59    5.10 
  -1  15   1   69.59    3.60 
   1  15  -1   71.99    3.70 
   0 -15   1   -0.10    0.90 
   0 -15   1    1.30    1.30 
   0 -15  -1    0.20    1.20 
   0 -15  -1   -0.50    0.90 
   0  15   1    0.30    0.80 
   0  15  -1    0.10    0.80 
   1 -15   1    6.90    2.50 
   1 -15   1    9.20    1.60 
   1 -15   1   10.40    3.00 
  -1 -15  -1    5.60    1.40 
   1 -15   1    7.60    1.40 
  -1 -15  -1   14.90    3.10 
   1  15   1    8.30    1.40 
  -2 -15  -1    0.50    1.10 
  -2 -15  -1    0.60    1.30 
   2 -15   1   -0.10    0.80 
   2 -15   1    0.70    0.80 
   2 -15   1    0.10    1.20 
   2 -15   1   -0.30    0.80 
   2  15   1    0.10    0.70 
   3 -15   1    5.50    1.10 
  -3 -15  -1    4.20    1.50 
   3 -15   1   10.60    2.50 
  -3 -15  -1   13.60    3.50 
   3 -15   1    6.90    1.60 
   3 -15   1    3.00    1.20 
   3  15   1    6.50    1.30 
   4 -15   1    3.90    1.10 
   4 -15   1    2.90    1.00 
  -4 -15  -1    5.00    1.60 
  -4 -15  -1    3.90    1.70 
  -4  15  -1    3.50    1.30 
   4  15   1    5.00    1.00 
   5 -15   1    2.60    1.10 
   5 -15   1    3.00    1.10 
  -5 -15  -1    2.00    1.70 
  -5 -15  -1    1.80    1.40 
   5  15   1    1.30    0.80 
  -5  15  -1    1.00    1.20 
   6 -15   1   -0.90    0.90 
  -6 -15  -1   -0.10    1.90 
  -6 -15  -1    2.20    1.60 
   6 -15   1   -0.50    1.00 
  -6  15  -1   -1.00    1.20 
   6  15   1    0.90    0.90 
   7 -15   1    1.20    1.20 
  -7 -15  -1    1.40    2.20 
   7 -15   1    1.30    1.00 
   7  15   1    0.20    0.90 
  -7  15  -1   -1.90    1.40 
  -8 -15  -1   20.40    6.00 
   8 -15   1   20.90    2.40 
   8 -15   1   20.60    2.70 
   8  15   1   20.40    2.30 
   9 -15   1    1.90    1.20 
   9 -15   1    3.30    1.40 
  -9 -15  -1    1.00    2.60 
   9  15   1    1.90    1.20 
  10 -15   1    2.40    1.50 
  11 -15   1   17.20    2.90 
  11 -15   1   11.10    2.50 
  11  15   1    9.90    2.30 
  11  15   1    7.40    2.20 
 -11 -16   1   40.20    5.70 
   9 -16  -1   17.00    2.90 
  -9 -16   1   26.20    4.70 
  -9 -16   1   26.70    6.80 
   9  16  -1   16.90    2.50 
   8 -16  -1   21.30    3.00 
  -8 -16   1   26.20    4.90 
   8 -16  -1   18.80    2.80 
   8  16  -1   18.90    2.40 
   7 -16  -1    3.80    1.20 
   7 -16  -1    4.70    1.40 
  -7 -16   1    4.90    2.00 
  -7  16   1    1.70    1.80 
   7  16  -1    5.20    1.30 
  -6 -16   1    4.10    2.10 
   6 -16  -1    5.60    1.30 
   6 -16  -1    6.80    1.50 
  -6 -16   1    5.00    1.90 
   6  16  -1    5.00    1.20 
  -6  16   1    4.60    1.70 
  -5 -16   1    2.30    1.70 
  -5 -16   1    0.80    1.50 
   5 -16  -1    0.50    0.90 
   5 -16  -1    0.30    1.00 
  -5  16   1   -0.20    1.20 
   5  16  -1   -0.50    0.80 
   4 -16  -1   18.50    2.00 
  -4 -16   1   24.10    4.00 
  -4 -16   1   16.90    4.20 
   4 -16  -1   16.70    2.00 
   4  16  -1   17.40    1.90 
   3 -16  -1    0.10    1.10 
  -3 -16   1    1.10    1.30 
   3 -16  -1    2.10    1.20 
   3 -16  -1    0.40    0.90 
   3 -16  -1    2.20    0.90 
  -3 -16   1    0.90    1.50 
   3  16  -1    0.50    0.80 
   2 -16  -1    1.20    1.20 
   2 -16  -1   -0.20    1.00 
  -2 -16   1    0.00    1.10 
   2 -16  -1    1.10    0.80 
  -2 -16   1    2.30    1.60 
   2 -16  -1    0.00    0.90 
   2  16  -1   -0.80    0.80 
  -1 -16   1    1.60    1.10 
  -1 -16   1    2.90    1.60 
   1 -16  -1    1.60    1.20 
   1 -16  -1   11.20    3.20 
   1  16  -1    1.40    1.00 
  -1  16   1    1.80    0.90 
   0 -16   1  104.09    6.30 
   0 -16  -1  103.89    6.30 
   0 -16  -1   95.69    6.40 
   0 -16   1   95.09    6.10 
   0  16  -1   97.99    5.00 
   0  16   1   94.79    4.80 
  -1 -16  -1   28.50    4.00 
   1 -16   1   15.70    3.00 
   1 -16   1   27.00    3.60 
  -1 -16  -1   20.30    4.00 
  -1  16  -1   16.60    2.00 
   1  16   1   20.00    1.80 
   2 -16   1    5.10    1.20 
  -2 -16  -1    5.00    1.60 
   2 -16   1    8.70    1.50 
   2 -16   1    3.90    1.20 
   2  16   1    7.10    1.30 
   3 -16   1    9.60    1.70 
  -3 -16  -1   13.30    3.50 
   3 -16   1    9.50    1.80 
  -3 -16  -1   10.50    4.00 
   3 -16   1   16.80    2.90 
   3  16   1   10.00    1.50 
  -4 -16  -1    2.70    1.60 
  -4 -16  -1    1.50    1.70 
   4 -16   1    1.80    1.00 
   4 -16   1    1.80    1.00 
  -4  16  -1    1.90    1.20 
   4  16   1    0.70    0.80 
   5 -16   1    6.20    1.30 
  -5 -16  -1   12.80    4.00 
   5 -16   1    3.70    1.30 
  -5 -16  -1    2.20    2.00 
   5  16   1    5.60    1.10 
  -5  16  -1    2.70    1.70 
   6 -16   1    9.70    2.20 
  -6 -16  -1    5.70    2.30 
   6 -16   1    7.80    1.90 
   6  16   1    7.90    1.70 
   7 -16   1   48.60    3.70 
  -7 -16  -1   63.39    5.80 
   7 -16   1   46.80    3.50 
  -7 -16  -1   62.49    7.30 
   7  16   1   47.00    3.30 
  -8 -16  -1   26.20    5.10 
   8 -16   1   15.50    2.70 
  -8 -16  -1   16.90    6.30 
   8 -16   1   12.70    2.30 
   8  16   1   14.30    2.30 
  10 -16   1   -2.00    1.20 
  10 -16   1    3.50    1.60 
  10  16   1   -0.30    1.20 
  10  16   1   -1.00    1.60 
 -10 -17   1   21.70    5.50 
  -9 -17   1   31.10    5.60 
   8 -17  -1    9.20    1.90 
  -8 -17   1    7.30    3.00 
   8  17  -1    8.90    1.70 
   7 -17  -1   12.10    2.60 
   7  17  -1   14.10    2.20 
  -7  17   1    8.20    2.30 
  -6 -17   1    6.80    2.20 
  -6 -17   1   18.70    5.30 
   6 -17  -1    4.30    1.40 
   6  17  -1    6.20    1.30 
  -6  17   1    1.60    1.70 
  -5 -17   1   18.30    4.40 
  -5 -17   1   16.70    5.00 
   5 -17  -1   11.80    2.20 
   5  17  -1   12.50    1.90 
  -5  17   1   12.50    4.00 
   4 -17  -1    2.90    1.10 
  -4 -17   1    2.50    1.70 
   4  17  -1    3.20    1.10 
  -4  17   1    2.50    1.40 
   3 -17  -1   39.10    2.70 
  -3 -17   1   46.90    4.80 
   3 -17  -1   34.30    4.20 
   3 -17  -1   48.40    4.00 
  -3 -17   1   39.20    4.60 
   3  17  -1   33.60    2.70 
  -2 -17   1   30.90    4.40 
   2 -17  -1   37.50    4.10 
  -2 -17   1   27.50    4.20 
   2 -17  -1   23.80    3.90 
   2  17  -1   26.20    2.30 
  -2  17   1   25.90    2.30 
  -1 -17   1    1.20    1.20 
   1 -17  -1   11.20    3.40 
   1 -17  -1    0.50    1.20 
  -1 -17   1    3.30    1.60 
   1  17  -1    1.90    1.00 
  -1  17   1    2.70    1.00 
   0 -17  -1   11.90    3.60 
   0 -17  -1    2.10    1.30 
   0 -17   1   -0.10    1.10 
   0 -17   1    4.60    1.70 
   0  17   1    2.60    0.90 
   0  17  -1    2.30    1.10 
   1 -17   1   28.30    3.90 
  -1 -17  -1   30.90    4.20 
   1 -17   1   24.30    3.40 
  -1 -17  -1   25.10    4.10 
  -1  17  -1   23.20    2.30 
   1  17   1   22.20    2.00 
   2 -17   1   36.00    4.20 
   2 -17   1   31.80    2.70 
  -2 -17  -1   43.20    4.70 
  -2 -17  -1   35.40    5.00 
   2 -17   1   42.20    4.20 
   2  17   1   31.10    2.40 
  -3 -17  -1   71.19    6.30 
   3 -17   1   75.09    5.40 
   3 -17   1   59.79    3.90 
  -3 -17  -1   79.89    5.70 
   3 -17   1   62.09    3.80 
   3  17   1   62.09    3.70 
   4 -17   1   39.80    3.10 
   4 -17   1   45.70    3.10 
   4  17   1   43.20    2.80 
   5 -17   1   -0.90    1.00 
   5 -17   1    0.50    1.10 
  -5 -17  -1    3.70    1.90 
  -5 -17  -1   -1.70    1.80 
   5  17   1    0.80    1.00 
   6 -17   1    1.40    1.20 
   6  17   1    1.80    1.00 
   7 -17   1   33.30    3.20 
  -7 -17  -1   48.20    5.70 
   7 -17   1   33.60    3.00 
  -7 -17  -1   39.20    7.20 
   7  17   1   34.70    2.90 
  -9 -17  -1    1.40    2.90 
   9 -17   1    0.10    1.40 
   9 -17   1   -0.30    1.30 
   9  17   1   -0.40    1.20 
   9  17   1   -0.90    1.80 
   9 -18  -1    1.00    1.60 
  -7 -18   1   25.90    6.50 
   7 -18  -1    9.90    2.00 
  -7 -18   1   22.50    5.30 
   7  18  -1   11.80    2.40 
   6 -18  -1    5.90    1.50 
  -6 -18   1   16.40    4.90 
   6  18  -1    5.50    1.40 
  -5 -18   1    1.90    2.00 
  -5 -18   1    7.40    2.30 
   5 -18  -1    5.10    1.40 
  -5  18   1    2.80    1.70 
   5  18  -1    5.00    1.30 
  -4 -18   1   57.69    5.60 
   4 -18  -1   48.50    3.30 
   4  18  -1   46.70    3.20 
  -4  18   1   49.40    5.30 
  -3 -18   1   15.10    4.30 
   3 -18  -1    1.60    1.40 
  -3 -18   1    2.80    1.70 
  -3  18   1    3.80    1.70 
   3  18  -1    5.00    1.20 
  -2 -18   1   44.60    4.90 
  -2 -18   1   34.10    4.50 
   2 -18  -1   28.10    4.40 
   2  18  -1   30.80    2.60 
  -1 -18   1   13.90    4.00 
  -1 -18   1   12.50    4.00 
   1 -18  -1   15.70    3.80 
   0 -18  -1   43.20    4.70 
   0 -18   1   43.40    4.60 
   0 -18  -1   27.70    4.80 
   0  18  -1   31.10    2.70 
  -1 -18  -1    4.60    1.80 
   1 -18   1   18.80    3.80 
  -1 -18  -1   17.80    4.20 
  -1  18  -1    9.20    2.00 
  -2 -18  -1   69.19    6.00 
   2 -18   1   65.29    5.30 
  -2 -18  -1   63.09    5.80 
   3 -18   1   10.00    2.10 
  -3  18  -1    9.80    2.20 
  -4 -18  -1    0.50    2.00 
   4 -18   1    1.60    1.20 
  -5 -18  -1   21.00    5.00 
   6 -18   1   57.49    4.10 
   6 -18   1   57.59    4.30 
  -6 -18  -1   61.49    7.70 
  -6 -18  -1   73.69    6.20 
  -8  18  -1    0.20    1.70 
   8  18   1   -0.20    1.70 
  -7 -19   1   66.89    6.60 
   7 -19  -1   51.69    4.00 
   7  19  -1   47.20    3.70 
   6 -19  -1   20.60    2.80 
   6  19  -1   20.50    2.60 
  -5 -19   1   22.10    5.20 
  -4 -19   1   21.40    5.10 
  -3 -19   1   31.70    4.80 
   2 -19  -1   59.89    5.40 
  -2  19   1   47.90    4.90 
   2  19  -1   49.10    3.40 
   1 -19  -1   28.40    4.30 
  -1 -19   1   26.30    4.80 
   1 -19  -1   31.00    4.20 
   0 -19   1   15.60    4.40 
   0 -19  -1   19.90    4.40 
   0 -19  -1   20.20    4.70 
  -1 -19  -1   22.70    4.40 
  -1 -19  -1    5.10    2.00 
  -1  19  -1   10.20    2.40 
   2 -19   1   36.50    4.40 
  -2 -19  -1   43.90    5.40 
  -3 -19  -1   48.30    5.40 
  -4 -19  -1   34.90    5.40 
  -4 -19  -1   25.70    5.20 
  -6 -19  -1   62.89    6.50 
  -5 -20   1   32.50    5.30 
  -4 -20   1   36.00    5.70 
  -3 -20   1   35.90    5.50 
  -2 -20   1   31.90    5.20 
  -1 -20   1   36.00    5.20 
   0 -20   1   22.60    4.60 
   1 -20   1   25.70    4.90 
  -1 -20  -1   41.20    5.20 
  -2 -20  -1   41.60    5.60 
  -3 -20  -1    0.60    2.20 
  -5 -20  -1   36.40    5.30 
  -1  21   1   -1.40    1.50 
   0  21   1   -1.90    1.60 
   1 -21   1   35.90    5.50 
  14   0  -2   35.70    2.80 
 -12   0   2   21.40    4.40 
  12   0  -2   12.40    1.70 
  12   0  -2   15.10    1.40 
 -11   0   2   10.70    3.50 
  10   0  -2   27.70    1.90 
 -10   0   2   18.90    3.90 
  10   0  -2   27.50    1.70 
   9   0  -2   -0.20    0.50 
   9   0  -2   -0.10    0.40 
  -9   0   2   -0.10    1.00 
  -9   0   2    0.30    0.40 
   8   0  -2    3.70    0.70 
  -8   0   2    2.00    1.10 
  -8   0   2    3.10    0.90 
   8   0  -2    4.10    0.90 
  -7   0   2   -0.20    0.90 
  -7   0   2    0.00    0.40 
   7   0  -2   -0.50    0.30 
   7   0  -2   -0.40    0.40 
  -6   0   2   14.30    2.50 
   6   0  -2   14.00    1.00 
   6   0  -2   12.70    0.90 
  -6   0   2   14.20    1.20 
  -5   0   2    0.40    0.70 
   5   0  -2    0.00    0.30 
   5   0  -2    0.20    0.30 
  -5   0   2    0.10    0.30 
  -4   0   2  120.69    5.50 
   4   0  -2  106.19    4.80 
  -4   0   2  110.39    4.80 
   4   0  -2  113.39    4.70 
  -3   0   2   -0.70    0.40 
  -3   0   2    4.80    1.90 
  -2   0   2 9999.00  403.36 
  -2   0   2 9585.74  399.06 
   2   0  -2 9498.05  397.86 
   2   0  -2 9586.04  396.66 
   1   0  -2   -1.20    0.10 
   1   0  -2   -1.20    0.10 
  -1   0   2   -1.40    0.10 
  -1   0   2   -1.20    0.10 
   0   0  -2 2709.23  114.39 
   0   0   2 2902.51  114.79 
   0   0   2 2903.71  114.09 
   0   0  -2 2804.32  114.19 
   1   0   2   -0.30    0.10 
  -1   0  -2   -0.30    0.20 
  -1   0  -2   -0.20    0.20 
   1   0   2   -0.40    0.20 
   2   0   2 3828.82  148.59 
   2   0   2 3711.63  148.29 
  -2   0  -2 3543.75  148.99 
  -2   0  -2 3595.14  148.09 
   3   0   2   -0.20    0.30 
  -3   0  -2   -0.10    0.30 
   3   0   2   -0.30    0.30 
  -4   0  -2 2485.65  103.79 
  -4   0  -2 2657.63  104.39 
   4   0   2 2640.14  103.39 
   4   0   2 2471.55  103.29 
  -5   0  -2   -0.40    0.50 
   5   0   2    0.00    0.30 
   5   0   2    0.00    0.30 
  -5   0  -2    0.50    0.30 
   6   0   2  138.79    6.20 
  -6   0  -2  138.69    6.10 
  -6   0  -2  145.19    7.00 
   6   0   2  147.19    6.20 
   7   0   2   -0.10    0.40 
  -7   0  -2   -0.10    0.40 
   7   0   2   -0.20    0.40 
  -7   0  -2   -0.70    0.60 
  -8   0  -2  216.08   10.70 
   8   0   2  227.58    9.80 
  -8   0  -2  226.98    9.60 
   8   0   2  239.28    9.70 
   9   0   2   -0.20    0.60 
  -9   0  -2   -0.10    0.90 
 -10   0  -2    1.30    0.70 
  10   0   2    1.50    0.80 
 -10   0  -2   -0.20    1.10 
 -11   0  -2    0.40    0.70 
  11   0   2   -0.30    0.80 
 -11   0  -2    1.00    1.20 
  12   0   2   66.69    3.90 
 -12   0  -2   77.79    6.20 
 -12   0  -2   66.59    3.70 
  14   0   2   18.80    2.30 
  16   0   2  140.59    7.90 
 -16   0  -2  183.08   11.30 
 -16  -1   2   83.39    8.00 
 -16   1   2  102.29    7.90 
  15  -1  -2   41.10    3.20 
  15   1  -2   43.20    3.20 
  14  -1  -2   42.80    3.10 
  14   1  -2   48.20    3.20 
  13  -1  -2    9.10    1.30 
  13  -1  -2    7.90    1.60 
  13   1  -2    9.00    1.70 
 -11  -1   2    1.00    1.20 
  11  -1  -2    0.20    0.70 
  11  -1  -2   -0.10    0.50 
  11   1  -2    0.30    0.50 
 -11   1   2    0.60    1.30 
  11   1  -2    0.30    0.70 
  10  -1  -2   73.49    3.50 
  10  -1  -2   71.99    3.70 
 -10  -1   2   74.99    5.50 
  10   1  -2   73.19    3.70 
 -10   1   2   75.29    5.70 
  10   1  -2   68.99    3.40 
  -9  -1   2    0.50    0.50 
   9  -1  -2   -0.10    0.40 
  -9  -1   2   -0.10    0.90 
   9  -1  -2    0.60    0.60 
  -9   1   2    1.60    1.20 
   9   1  -2    0.30    0.60 
   9   1  -2    0.60    0.40 
  -8  -1   2   12.10    1.30 
   8  -1  -2   12.40    1.20 
  -8  -1   2    8.60    2.60 
   8  -1  -2   14.10    1.10 
  -8   1   2   15.10    3.40 
   8   1  -2   14.40    1.30 
   8   1  -2   13.60    1.00 
  -7  -1   2  205.78    8.90 
   7  -1  -2  210.48    8.90 
   7  -1  -2  210.78    8.70 
  -7  -1   2  202.88    9.80 
   7   1  -2  208.38    8.60 
   7   1  -2  215.78    8.90 
  -7   1   2  205.88   10.00 
   6  -1  -2  399.16   16.60 
   6  -1  -2  405.66   16.50 
  -6  -1   2  404.66   17.30 
  -6  -1   2  409.86   16.70 
   6   1  -2  404.76   16.60 
   6   1  -2  402.16   16.40 
  -6   1   2  395.26   17.40 
   5  -1  -2  744.53   31.30 
   5  -1  -2  777.02   31.20 
  -5  -1   2  810.12   31.40 
  -5  -1   2  794.52   32.00 
  -5   1   2  727.53   32.00 
  -5   1   2  793.32   31.20 
   5   1  -2  781.42   31.20 
   5   1  -2  748.43   31.30 
   4  -1  -2  894.31   37.40 
   4  -1  -2  935.91   37.30 
  -4  -1   2  865.71   37.50 
  -4  -1   2 1025.50   38.00 
   4   1  -2  887.21   37.40 
  -4   1   2  915.51   37.30 
   4   1  -2  924.11   37.30 
  -4   1   2  949.31   38.00 
   3  -1  -2   16.40    0.90 
  -3  -1   2   21.90    2.20 
  -3  -1   2   15.90    1.40 
   3  -1  -2   16.80    1.00 
  -3   1   2   21.00    1.00 
   3   1  -2   17.80    0.90 
   3   1  -2   16.50    1.00 
  -2  -1   2   -0.10    0.30 
   2  -1  -2   -0.10    0.20 
  -2  -1   2    0.20    0.40 
   2  -1  -2   -0.20    0.10 
   2   1  -2    0.10    0.20 
   2   1  -2    0.10    0.20 
  -2   1   2   -0.10    0.30 
  -2   1   2   -0.20    0.20 
   1  -1  -2  796.22   31.80 
   1  -1  -2  824.72   32.00 
  -1  -1   2  724.83   31.80 
   1   1  -2  774.12   31.70 
   1   1  -2  738.93   31.70 
  -1   1   2  848.52   31.80 
   0  -1  -2  462.55   19.30 
   0  -1  -2  448.26   19.50 
   0  -1   2  494.45   19.40 
   0  -1   2  459.05   19.30 
   0   1   2  496.75   19.50 
   0   1  -2  467.65   19.30 
   1  -1   2  598.14   24.90 
  -1  -1  -2  617.94   24.80 
  -1  -1  -2  568.24   25.00 
   1  -1   2  600.74   24.90 
  -1   1  -2  699.33   25.00 
   1   1   2  614.44   25.00 
  -1   1  -2  600.34   24.90 
   1   1   2  619.24   24.80 
   2  -1   2   48.20    2.20 
   2  -1   2   51.59    2.30 
  -2  -1  -2   49.20    2.20 
  -2  -1  -2   47.70    2.60 
   2   1   2   49.50    2.40 
   2   1   2   48.20    2.20 
  -2   1  -2   55.99    2.80 
  -2   1  -2   48.10    2.20 
  -3  -1  -2 1669.63   68.69 
  -3  -1  -2 1629.04   68.99 
   3  -1   2 1679.43   68.69 
   3  -1   2 1685.83   68.89 
   3  -1   2 1691.93   68.69 
   3   1   2 1642.54   68.99 
   3   1   2 1751.82   68.79 
  -3   1  -2 1887.11   69.09 
  -4  -1  -2   19.00    1.10 
  -4  -1  -2   20.00    1.80 
   4  -1   2   20.20    1.20 
   4  -1   2   20.50    1.20 
   4  -1   2   21.00    1.20 
   4   1   2   20.00    1.20 
   4   1   2   22.80    1.40 
  -4   1  -2   21.40    2.10 
  -5  -1  -2  375.36   17.00 
   5  -1   2  405.16   16.40 
   5  -1   2  384.86   16.50 
  -5  -1  -2  387.26   16.40 
   5  -1   2  414.46   16.40 
  -5   1  -2  437.66   17.20 
   5   1   2  394.66   16.50 
   5   1   2  410.06   16.60 
  -6  -1  -2   29.00    2.60 
  -6  -1  -2   31.70    1.70 
   6  -1   2   32.40    1.90 
   6  -1   2   35.00    1.80 
   6  -1   2   34.30    1.80 
   6   1   2   35.70    2.00 
   6   1   2   33.60    1.90 
  -6   1  -2   31.30    2.80 
   7  -1   2   90.19    4.20 
   7  -1   2   93.39    4.10 
  -7  -1  -2   86.79    4.00 
  -7  -1  -2   85.19    5.10 
   7  -1   2   94.99    4.10 
   7   1   2   92.79    4.20 
   7   1   2   93.69    4.30 
  -7   1  -2   86.19    5.20 
   8  -1   2    1.90    0.50 
  -8  -1  -2    0.80    0.80 
   8  -1   2    1.10    0.60 
  -8  -1  -2    1.80    0.50 
   8   1   2    1.40    0.50 
  -8   1  -2    1.20    1.00 
   8   1   2    1.50    0.60 
  -9  -1  -2    0.50    0.90 
  -9  -1  -2    1.10    0.60 
   9  -1   2    1.20    0.70 
   9   1   2    1.20    0.70 
  -9   1  -2   -0.70    1.00 
  -9   1  -2    0.90    0.60 
  10  -1   2  271.37   11.60 
 -10  -1  -2  256.67   12.90 
 -10  -1  -2  272.87   11.30 
  10   1   2  269.37   11.60 
 -10   1  -2  259.97   12.90 
 -10   1  -2  275.17   11.50 
 -11  -1  -2   32.10    2.10 
  11  -1   2   34.80    2.50 
 -11  -1  -2   33.50    4.50 
  11   1   2   35.20    2.50 
 -11   1  -2   34.80    2.30 
 -12  -1  -2   15.20    4.10 
  12  -1   2    9.80    1.70 
 -12   1  -2   10.20    1.60 
  12   1   2   11.60    1.80 
 -13  -1  -2   16.60    4.90 
 -14  -1  -2   20.00    5.50 
 -15  -1  -2   22.00    5.90 
 -16  -1  -2   34.40    6.70 
  16  -1   2   10.80    2.60 
  16   1   2   19.40    2.70 
  17  -2  -2   60.29    4.20 
  17   2  -2   61.29    4.30 
 -16  -2   2   22.60    6.10 
 -15  -2   2   45.20    6.50 
 -14  -2   2   36.90    5.40 
  13  -2  -2   50.69    3.30 
  13  -2  -2   54.99    3.10 
 -13  -2   2   55.39    5.60 
  13   2  -2   51.09    3.30 
 -13   2   2   59.39    6.20 
  12  -2  -2   12.10    1.70 
  12  -2  -2   13.60    1.50 
 -12   2   2   22.40    4.30 
  12   2  -2    8.40    1.60 
 -11   2   2   13.70    3.90 
  10  -2  -2   32.60    1.90 
  10  -2  -2   30.00    2.10 
 -10  -2   2   27.10    2.20 
  10   2  -2   30.00    2.10 
  10   2  -2   30.10    1.70 
  -9  -2   2    9.50    1.50 
   9  -2  -2    9.70    1.20 
   9  -2  -2    9.00    1.10 
  -9  -2   2    8.20    2.70 
   9   2  -2   10.60    0.90 
  -9   2   2   13.60    3.80 
   9   2  -2   10.20    1.20 
   8  -2  -2    2.00    0.60 
  -8  -2   2    2.10    0.70 
   8  -2  -2    3.00    0.60 
  -8  -2   2    0.50    0.90 
   8   2  -2    2.60    0.60 
  -8   2   2    1.30    1.10 
   8   2  -2    3.00    0.70 
   7  -2  -2   51.49    2.50 
  -7  -2   2   51.99    3.70 
   7  -2  -2   50.59    2.60 
  -7  -2   2   48.40    2.80 
   7   2  -2   51.19    2.60 
  -7   2   2   50.09    4.10 
   7   2  -2   49.60    2.30 
  -6  -2   2   62.49    3.40 
   6  -2  -2   70.29    3.10 
   6  -2  -2   68.69    3.10 
  -6  -2   2   61.99    4.00 
  -6   2   2   70.49    4.60 
   6   2  -2   68.29    3.20 
   6   2  -2   68.99    2.90 
  -5  -2   2   84.39    4.40 
   5  -2  -2   82.39    3.70 
  -5  -2   2   85.29    4.00 
   5  -2  -2   83.09    3.70 
   5   2  -2   83.49    3.50 
   5   2  -2   82.49    3.70 
  -5   2   2   86.09    4.80 
   4  -2  -2  112.79    4.80 
   4  -2  -2  108.89    4.80 
  -4  -2   2  117.79    5.40 
  -4  -2   2  117.79    5.10 
   4   2  -2  109.69    4.80 
   4   2  -2  112.59    4.70 
  -4   2   2  117.89    5.50 
   3  -2  -2  147.09    6.20 
  -3  -2   2  139.99    6.50 
  -3  -2   2  159.98    6.70 
   3   2  -2  145.99    6.20 
   3   2  -2  144.59    6.10 
  -3   2   2  156.98    6.70 
  -3   2   2  154.48    6.20 
   2  -2  -2   58.29    2.50 
  -2  -2   2   56.19    2.80 
   2  -2  -2   57.39    2.50 
  -2  -2   2   58.29    2.80 
  -2   2   2   60.19    2.60 
  -2   2   2   60.59    3.00 
   2   2  -2   58.39    2.40 
   2   2  -2   54.09    2.50 
   1  -2  -2    0.20    0.10 
  -1  -2   2    0.10    0.30 
   1  -2  -2    0.30    0.20 
  -1  -2   2    0.20    0.20 
  -1  -2   2    0.00    0.20 
   1  -2  -2    0.40    0.20 
  -1   2   2    0.30    0.20 
   1   2  -2    0.30    0.20 
   0  -2  -2   88.99    3.50 
   0  -2   2   79.69    3.70 
   0  -2  -2   86.09    3.80 
   0   2  -2   85.59    3.50 
   0   2   2   82.89    3.50 
  -1  -2  -2  312.57   11.00 
   1  -2   2  267.27   11.10 
   1  -2   2  258.67   11.10 
  -1  -2  -2  246.48   11.30 
   1   2   2  277.07   11.30 
   1   2   2  285.57   11.00 
  -1   2  -2  270.57   11.10 
  -1   2  -2  248.78   11.10 
   2  -2   2  403.76   16.90 
   2  -2   2  405.76   16.90 
  -2  -2  -2  425.06   17.30 
   2  -2   2  380.96   16.90 
  -2  -2  -2  436.36   16.80 
  -2   2  -2  446.46   17.20 
   2   2   2  416.86   17.10 
   2   2   2  409.06   16.90 
  -3  -2  -2  330.97   13.80 
   3  -2   2  331.37   13.90 
   3  -2   2  326.37   13.80 
   3  -2   2  333.87   13.90 
  -3  -2  -2  351.56   14.40 
  -3   2  -2  371.06   14.30 
   3   2   2  340.27   14.10 
   3   2   2  330.67   13.90 
  -4  -2  -2  105.69    4.60 
   4  -2   2  104.39    4.60 
   4  -2   2  107.29    4.70 
  -4  -2  -2  111.99    5.30 
   4  -2   2  108.89    4.70 
   4   2   2  106.59    5.00 
   4   2   2  105.29    4.70 
  -4   2  -2  118.49    5.40 
   5  -2   2  225.28    9.20 
   5  -2   2  215.98    9.20 
  -5  -2  -2  212.68    9.00 
  -5  -2  -2  218.48    9.90 
  -5   2  -2  217.38    9.90 
   5   2   2  229.88    9.50 
   5   2   2  214.08    9.20 
   6  -2   2    2.90    0.60 
  -6  -2  -2    1.60    0.70 
  -6  -2  -2    3.50    0.60 
   6  -2   2    2.60    0.60 
   6   2   2    3.30    0.80 
  -6   2  -2    2.40    0.90 
   6   2   2    3.60    1.10 
   7  -2   2  783.72   31.80 
  -7  -2  -2  750.22   31.50 
  -7  -2  -2  724.03   32.50 
   7  -2   2  813.82   31.70 
   7   2   2  815.32   32.00 
   7   2   2  781.72   31.80 
  -7   2  -2  773.62   32.60 
   8  -2   2  131.59    5.90 
  -8  -2  -2  127.19    6.90 
   8  -2   2  133.09    5.70 
  -8  -2  -2  128.89    5.60 
   8   2   2  132.99    6.10 
   8   2   2  121.79    5.80 
  -8   2  -2  124.69    7.00 
  -9  -2  -2   32.50    3.70 
   9  -2   2   39.20    2.40 
   9  -2   2   39.10    2.20 
  -9  -2  -2   37.60    2.00 
  -9   2  -2   28.90    3.80 
   9   2   2   39.70    2.60 
   9   2   2   38.60    2.40 
 -10  -2  -2    2.90    0.70 
  10  -2   2    1.80    0.80 
 -10  -2  -2    1.70    1.20 
 -10   2  -2    0.80    1.20 
 -10   2  -2    2.60    0.80 
  10   2   2    1.60    0.80 
 -11  -2  -2  199.78   10.60 
  11  -2   2  197.38    8.90 
 -11   2  -2  188.58    8.70 
  11   2   2  205.58    8.90 
 -11   2  -2  196.38   10.60 
 -12  -2  -2   24.00    4.40 
  12  -2   2   15.40    1.90 
 -12   2  -2   21.70    2.00 
  12   2   2   17.10    2.00 
 -13  -2  -2   16.20    4.90 
  14  -2   2   42.00    3.30 
 -14  -2  -2   49.99    6.10 
  14   2   2   44.90    3.30 
  15  -2   2   58.89    4.20 
 -15  -2  -2   81.29    7.60 
  15   2   2   65.69    4.30 
 -16  -2  -2   61.19    6.90 
  17  -3  -2   22.60    2.90 
  17   3  -2   26.40    3.10 
 -16  -3   2   42.70    6.80 
  16   3  -2   23.00    2.90 
 -15  -3   2   13.10    5.20 
  14  -3  -2   41.00    3.10 
  14  -3  -2   43.90    2.90 
 -14  -3   2   49.20    5.80 
  14   3  -2   43.80    3.20 
 -13  -3   2    1.60    1.60 
  13  -3  -2    0.50    0.90 
  13  -3  -2    1.00    0.80 
 -13   3   2    2.10    1.60 
  13   3  -2   -0.10    0.90 
 -12  -3   2    0.80    1.30 
  12  -3  -2   -0.10    0.70 
  12  -3  -2    0.40    0.70 
  12   3  -2    0.70    0.90 
 -12   3   2   -0.10    1.40 
  11  -3  -2    8.30    1.30 
 -11  -3   2   13.60    3.40 
  11  -3  -2    8.20    1.40 
  11   3  -2    7.60    1.50 
 -10  -3   2  629.04   25.70 
 -10  -3   2  561.14   26.70 
  10  -3  -2  620.64   25.60 
  10  -3  -2  643.14   25.50 
 -10   3   2  611.04   27.20 
  10   3  -2  617.14   25.60 
  10   3  -2  650.83   25.50 
   9  -3  -2   50.79    2.70 
  -9  -3   2   42.40    3.90 
  -9  -3   2   47.00    3.00 
   9  -3  -2   48.50    2.60 
   9   3  -2   46.30    2.30 
  -9   3   2   54.39    5.00 
   9   3  -2   51.19    2.70 
  -8  -3   2   -0.60    0.70 
   8  -3  -2    0.10    0.50 
   8  -3  -2   -0.20    0.50 
  -8  -3   2    0.50    0.60 
   8   3  -2    0.20    0.30 
   8   3  -2    0.80    0.50 
  -8   3   2    0.80    1.10 
  -7  -3   2    6.50    2.00 
   7  -3  -2    3.70    0.70 
  -7  -3   2    2.20    0.70 
   7  -3  -2    3.40    0.60 
   7   3  -2    4.50    0.50 
  -7   3   2    3.10    1.20 
   7   3  -2    4.10    0.80 
   6  -3  -2   36.80    2.00 
  -6  -3   2   39.20    2.50 
   6  -3  -2   38.20    2.00 
  -6  -3   2   36.50    2.90 
   6   3  -2   37.90    1.70 
  -6   3   2   40.60    3.60 
   6   3  -2   38.10    2.00 
  -5  -3   2  176.38    7.50 
   5  -3  -2  164.38    7.10 
   5  -3  -2  162.98    7.10 
  -5  -3   2  176.08    7.80 
  -5   3   2  174.98    8.00 
   5   3  -2  162.48    6.90 
   5   3  -2  159.78    7.10 
   4  -3  -2  147.79    6.30 
  -4  -3   2  159.38    6.90 
  -4  -3   2  147.99    6.70 
   4  -3  -2  146.59    6.30 
  -4   3   2  160.08    7.00 
   4   3  -2  139.59    6.30 
  -3  -3   2  100.99    4.70 
   3  -3  -2   91.99    4.20 
  -3  -3   2   98.79    4.60 
   3  -3  -2   98.09    4.20 
  -3   3   2  104.89    4.80 
  -3   3   2   99.99    4.30 
   2  -3  -2    0.20    0.20 
   2  -3  -2    0.40    0.30 
   2  -3  -2    1.90    0.90 
  -2  -3   2    0.70    0.60 
   2   3  -2    0.30    0.30 
   2   3  -2    0.30    0.20 
  -2   3   2   -0.10    0.30 
  -1  -3   2    9.20    1.40 
   1  -3  -2    5.90    0.60 
  -1  -3   2    5.00    0.90 
   1  -3  -2    6.00    0.40 
  -1  -3   2    4.80    0.60 
   1  -3  -2    6.40    1.00 
   1   3  -2    5.60    0.50 
  -1   3   2    5.70    0.80 
   0  -3   2  276.77   10.40 
   0  -3   2  252.77   10.20 
   0  -3  -2  248.78   10.30 
   0  -3  -2  255.57   10.00 
   0  -3   2  224.38   10.10 
   0  -3  -2  233.78   10.40 
   0   3   2  233.38   10.00 
   0   3  -2  248.38   10.10 
   1  -3   2  113.89    5.10 
  -1  -3  -2  123.89    5.30 
  -1  -3  -2  114.99    5.40 
   1  -3   2  114.59    5.10 
  -1  -3  -2  137.79    5.00 
   1  -3   2  121.49    5.30 
   1   3   2  122.29    5.00 
  -1   3  -2  120.89    5.20 
  -2  -3  -2    6.20    1.00 
   2  -3   2    7.90    1.00 
  -2  -3  -2    8.70    0.50 
  -2  -3  -2    8.00    1.20 
   2  -3   2    6.30    0.60 
   2  -3   2    6.20    0.70 
   2   3   2    7.00    0.60 
  -3  -3  -2    3.20    0.40 
  -3  -3  -2    1.50    0.50 
   3  -3   2    3.10    0.60 
  -3  -3  -2    2.90    1.10 
   3  -3   2    2.80    0.50 
   3  -3   2    4.00    0.80 
   3   3   2    2.60    0.50 
  -3   3  -2    5.60    1.60 
   4  -3   2  162.68    6.70 
  -4  -3  -2  156.78    7.30 
   4  -3   2  159.78    6.70 
  -4  -3  -2  161.88    6.50 
  -4  -3  -2  145.29    6.90 
   4  -3   2  151.68    6.60 
   4   3   2  156.58    6.70 
  -4   3  -2  167.68    7.40 
  -5  -3  -2  129.79    6.30 
   5  -3   2  125.59    5.60 
  -5  -3  -2  122.79    5.30 
   5  -3   2  126.19    5.50 
  -5   3  -2  136.39    6.50 
   5   3   2  128.89    5.90 
   5   3   2  126.29    5.60 
  -6  -3  -2   43.20    2.10 
  -6  -3  -2   42.00    3.20 
   6  -3   2   46.70    2.30 
   6  -3   2   45.30    2.40 
  -6   3  -2   46.50    3.60 
   6   3   2   46.50    2.80 
   6   3   2   44.50    2.40 
  -7  -3  -2   27.10    1.50 
   7  -3   2   28.40    1.70 
  -7  -3  -2   23.00    2.80 
   7  -3   2   28.20    1.80 
   7   3   2   27.90    1.80 
  -7   3  -2   28.00    3.40 
   7   3   2   30.80    2.20 
  -8  -3  -2   25.30    3.00 
  -8  -3  -2   25.00    1.50 
   8  -3   2   26.60    1.80 
   8  -3   2   25.60    1.70 
   8   3   2   26.10    1.80 
  -8   3  -2   25.00    3.60 
   8   3   2   26.60    2.20 
  -9  -3  -2   22.00    1.40 
   9  -3   2   21.70    1.70 
  -9  -3  -2   20.40    3.30 
   9  -3   2   21.00    1.80 
   9   3   2   23.00    2.20 
   9   3   2   21.10    1.80 
  -9   3  -2   21.70    3.80 
  10  -3   2   31.40    2.10 
  10  -3   2   30.20    2.20 
 -10  -3  -2   25.60    3.80 
 -10   3  -2   30.10    4.20 
  10   3   2   28.30    2.20 
 -11  -3  -2   57.99    5.20 
  11  -3   2   51.89    3.20 
 -11   3  -2   52.29    3.20 
  11   3   2   52.99    3.30 
 -11   3  -2   59.69    5.40 
  12  -3   2    5.30    1.20 
 -12  -3  -2    6.60    2.00 
 -12   3  -2    5.30    1.20 
  12   3   2    5.60    1.20 
 -13  -3  -2   22.10    4.70 
  13  -3   2   13.90    2.00 
 -13   3  -2   14.00    2.00 
  13   3   2   13.70    2.00 
  14  -3   2   47.00    3.40 
 -14   3  -2   46.40    3.20 
  14   3   2   50.39    3.50 
 -15  -3  -2   35.10    6.00 
  15  -4  -2   47.10    3.10 
  15  -4  -2   39.40    3.20 
  15   4  -2   40.40    3.30 
  14  -4  -2    4.70    1.30 
 -14  -4   2   15.20    4.90 
  14  -4  -2    6.30    1.20 
  14   4  -2    5.40    1.40 
 -13  -4   2    6.00    2.20 
  13  -4  -2    5.40    1.20 
  13  -4  -2    7.50    1.60 
  13   4  -2    7.30    1.80 
 -13   4   2    5.10    1.90 
 -12  -4   2   73.59    6.00 
  12  -4  -2   70.89    3.70 
  12  -4  -2   63.69    3.80 
  12   4  -2   69.69    3.90 
 -12   4   2   69.79    6.20 
  11  -4  -2    0.30    0.70 
  11  -4  -2    0.50    0.70 
 -11  -4   2    0.90    1.10 
  11   4  -2   -0.20    0.80 
 -11   4   2    0.20    1.40 
 -10  -4   2   40.80    3.10 
 -10  -4   2   44.10    4.40 
  10  -4  -2   49.60    2.70 
  10  -4  -2   50.49    2.80 
 -10   4   2   48.40    5.20 
  10   4  -2   51.19    2.90 
   9  -4  -2    1.00    0.60 
  -9  -4   2    0.00    0.90 
   9  -4  -2   -0.20    0.60 
  -9  -4   2   -0.10    0.70 
   9   4  -2    0.60    0.60 
  -9   4   2    1.20    1.40 
  -8  -4   2  133.39    7.00 
  -8  -4   2  128.19    6.20 
   8  -4  -2  134.99    5.80 
   8  -4  -2  130.29    5.90 
   8   4  -2  129.59    5.90 
  -8   4   2  132.29    7.70 
  -7  -4   2   -0.30    0.60 
   7  -4  -2   -0.30    0.50 
   7  -4  -2    0.10    0.40 
  -7  -4   2    0.30    0.70 
   7   4  -2    0.30    0.50 
  -7   4   2    0.70    1.10 
   6  -4  -2   12.10    1.10 
   6  -4  -2   13.70    1.10 
  -6  -4   2   13.00    1.70 
  -6  -4   2   12.80    2.10 
  -6   4   2   16.60    2.70 
   6   4  -2   13.70    1.10 
  -5  -4   2   41.50    2.70 
  -5  -4   2   42.00    2.90 
   5  -4  -2   44.90    2.10 
  -5   4   2   45.70    3.10 
   5   4  -2   40.20    2.10 
  -4  -4   2   27.40    2.10 
   4  -4  -2   27.60    1.40 
  -4  -4   2   25.40    2.00 
   4  -4  -2   25.60    1.50 
  -4   4   2   28.80    2.20 
  -4   4   2   27.80    1.50 
   4   4  -2   26.60    1.50 
   3  -4  -2  955.30   39.70 
   3  -4  -2 1006.30   39.70 
  -3  -4   2  995.30   40.10 
  -3  -4   2 1013.70   40.20 
  -3   4   2 1045.70   40.40 
  -3   4   2  931.91   39.80 
   3   4  -2  937.41   39.80 
   2  -4  -2  146.49    6.20 
   2  -4  -2  159.98    6.70 
  -2  -4   2  149.59    6.60 
   2   4  -2  154.98    6.10 
   2   4  -2  138.59    6.30 
  -2   4   2  148.49    6.40 
   1  -4  -2 2002.70   79.59 
  -1  -4   2 1839.92   79.29 
   1  -4  -2 1869.41   79.09 
  -1  -4   2 1962.20   79.29 
   1  -4  -2 2101.59   79.39 
  -1  -4   2 1881.21   79.49 
   1  -4  -2 2059.59   79.39 
   1   4  -2 1991.30   78.99 
   0  -4   2  231.88   10.20 
   0  -4   2  221.28   10.10 
   0  -4  -2  266.57   10.10 
   0  -4   2  247.48   10.30 
   0  -4  -2  243.88   10.60 
   0  -4  -2  254.57   10.40 
   0  -4   2  285.67   10.60 
   0   4   2  238.08   10.10 
   1  -4   2  214.78    9.60 
  -1  -4  -2  219.38   10.10 
   1  -4   2  228.58    9.90 
  -1  -4  -2  260.27   10.00 
  -1  -4  -2  249.88    9.50 
   1  -4   2  216.98    9.70 
   1  -4   2  242.78    9.80 
   1   4   2  240.38    9.60 
  -2  -4  -2    2.70    0.40 
   2  -4   2    1.50    0.50 
  -2  -4  -2    1.10    0.50 
   2  -4   2    1.40    0.40 
   2  -4   2    1.70    0.40 
  -2  -4  -2    0.50    0.50 
  -2   4  -2    3.20    1.00 
   2   4   2    2.20    0.40 
  -3  -4  -2  152.78    7.00 
   3  -4   2  146.59    6.40 
  -3  -4  -2  143.19    6.70 
   3  -4   2  148.79    6.40 
   3  -4   2  153.38    6.40 
  -3   4  -2  161.98    6.80 
   3   4   2  150.58    6.40 
   4  -4   2    2.10    0.50 
   4  -4   2    2.00    0.50 
   4  -4   2    2.60    0.50 
  -4  -4  -2    1.00    0.60 
  -4  -4  -2    1.30    0.60 
   4   4   2    2.00    0.40 
  -4   4  -2    1.40    0.70 
   5  -4   2  118.69    5.10 
  -5  -4  -2  113.99    5.90 
  -5  -4  -2  109.59    5.40 
   5  -4   2  117.19    5.10 
   5   4   2  113.99    5.10 
  -5   4  -2  118.79    6.00 
  -6  -4  -2  436.16   17.80 
   6  -4   2  456.45   18.10 
   6  -4   2  437.86   18.10 
  -6  -4  -2  439.46   19.00 
  -6  -4  -2  411.36   18.30 
   6   4   2  427.06   18.10 
  -6   4  -2  452.15   19.00 
   7  -4   2  391.26   16.20 
   7  -4   2  401.56   16.20 
  -7  -4  -2  370.86   17.10 
  -7  -4  -2  388.26   15.90 
  -7   4  -2  379.06   17.20 
   7   4   2  402.66   16.70 
   7   4   2  385.36   16.20 
  -8  -4  -2  108.29    6.40 
  -8  -4  -2  108.89    4.90 
   8  -4   2  115.69    5.40 
   8  -4   2  121.89    5.30 
   8   4   2  118.79    5.80 
   8   4   2  120.89    5.40 
  -8   4  -2  110.89    6.80 
   9  -4   2   12.60    1.50 
   9  -4   2   11.80    1.40 
  -9  -4  -2    9.00    2.80 
   9   4   2   11.30    1.40 
   9   4   2   12.60    2.00 
  -9   4  -2   11.90    3.70 
  10  -4   2    0.30    0.70 
  10  -4   2    0.10    0.70 
 -10  -4  -2    0.60    1.10 
 -10   4  -2    1.00    1.20 
  10   4   2   -0.80    0.70 
  10   4   2    0.20    0.80 
  11  -4   2   67.79    3.90 
 -11  -4  -2   72.69    6.00 
  11   4   2   67.59    3.90 
 -11   4  -2   75.89    5.90 
 -12  -4  -2   23.40    4.50 
  12  -4   2   16.90    2.00 
  12   4   2   15.50    2.00 
 -12   4  -2   18.60    2.10 
  13  -4   2   19.80    2.30 
  13   4   2   23.60    2.40 
 -13   4  -2   23.60    2.40 
 -15  -4  -2   22.30    6.10 
 -16  -4  -2   82.49    7.30 
  15  -5  -2   13.40    2.20 
  15  -5  -2   11.80    2.20 
  15   5  -2   14.90    2.40 
 -14  -5   2   20.40    5.00 
 -14   5   2   19.40    5.10 
  13  -5  -2    4.50    1.20 
  13  -5  -2    5.10    1.10 
 -13  -5   2   12.50    4.40 
  13   5  -2    4.50    1.20 
 -13   5   2    2.30    1.70 
  12  -5  -2    7.20    1.60 
 -12  -5   2   14.60    4.10 
  12  -5  -2    8.80    1.60 
 -12   5   2    3.70    1.80 
  12   5  -2    7.10    1.60 
 -11  -5   2   28.40    2.70 
  11  -5  -2   30.30    2.30 
  11  -5  -2   32.50    2.30 
 -11  -5   2   33.60    4.30 
 -11   5   2   27.20    4.80 
  11   5  -2   29.70    2.30 
  10  -5  -2    8.20    1.40 
  10  -5  -2    9.40    1.50 
  10   5  -2    8.80    1.50 
 -10   5   2   18.50    4.50 
  -9  -5   2  191.78   10.20 
   9  -5  -2  210.68    8.90 
   9  -5  -2  215.18    9.00 
  -9  -5   2  198.28    9.30 
   9   5  -2  210.38    9.00 
  -9   5   2  207.88   10.90 
   8  -5  -2    9.30    1.20 
  -8  -5   2    6.10    1.90 
   8  -5  -2    6.30    1.10 
  -8  -5   2   11.30    2.60 
  -8   5   2   12.50    4.10 
   8   5  -2    8.20    1.20 
  -7  -5   2  199.28    9.30 
   7  -5  -2  215.18    8.90 
  -7  -5   2  200.78    9.90 
   7  -5  -2  212.48    8.90 
  -7   5   2  215.68   10.30 
   7   5  -2  208.48    8.90 
  -6  -5   2   14.00    2.00 
  -6  -5   2   17.80    2.30 
   6  -5  -2   16.40    1.20 
   6  -5  -2   14.30    1.20 
   6   5  -2   14.90    1.20 
  -6   5   2   19.80    2.70 
   5  -5  -2    0.30    0.40 
  -5  -5   2    0.10    0.50 
  -5  -5   2    0.00    0.70 
   5  -5  -2   -0.40    0.40 
   5   5  -2    0.20    0.40 
  -5   5   2    0.50    0.60 
  -4  -5   2  240.18   10.30 
   4  -5  -2  223.98    9.70 
  -4  -5   2  236.48   10.20 
   4  -5  -2  237.88    9.70 
  -4   5   2  221.68    9.70 
   4   5  -2  222.18    9.70 
  -4   5   2  245.18   10.50 
  -3  -5   2  532.55   21.80 
   3  -5  -2  520.95   21.30 
   3  -5  -2  553.54   21.80 
  -3  -5   2  522.75   21.70 
  -3   5   2  493.55   21.40 
   3   5  -2  512.45   21.30 
  -2  -5   2  554.84   23.20 
   2  -5  -2  568.84   23.00 
   2  -5  -2  559.74   22.90 
   2  -5  -2  601.34   23.40 
   2  -5  -2  558.64   22.80 
   2   5  -2  523.35   22.90 
   2   5  -2  573.84   22.70 
  -1  -5   2   54.09    2.80 
   1  -5  -2   55.19    2.80 
   1  -5  -2   53.19    2.50 
  -1  -5   2   52.59    2.60 
   1  -5  -2   56.99    2.50 
   1  -5  -2   56.39    3.00 
   1   5  -2   59.09    2.50 
   0  -5  -2    7.70    1.10 
   0  -5   2    9.80    1.40 
   0  -5   2    7.70    1.00 
   0  -5  -2    8.20    1.20 
   0  -5   2    5.70    0.70 
   0  -5   2    6.30    0.60 
   0   5   2    7.80    0.60 
  -1  -5  -2 1711.33   60.99 
  -1  -5  -2 1450.05   61.39 
   1  -5   2 1580.94   61.09 
   1  -5   2 1561.14   61.09 
   1  -5   2 1417.86   60.89 
   1  -5   2 1382.16   60.89 
  -1  -5  -2 1463.35   61.09 
   1   5   2 1514.65   61.09 
  -2  -5  -2  949.80   37.50 
   2  -5   2  883.41   37.20 
   2  -5   2  855.91   37.30 
  -2  -5  -2  892.31   37.70 
  -2  -5  -2  966.30   37.00 
   2  -5   2  878.01   37.10 
  -2   5  -2  965.70   37.50 
   2   5   2  951.80   37.10 
  -3  -5  -2  275.17   12.40 
   3  -5   2  289.47   12.20 
   3  -5   2  291.17   12.10 
  -3  -5  -2  294.67   12.80 
   3  -5   2  293.97   12.20 
   3   5   2  294.07   12.10 
  -3   5  -2  313.47   12.60 
   4  -5   2   11.60    1.00 
  -4  -5  -2    8.90    1.50 
  -4  -5  -2   10.10    1.80 
   4  -5   2   13.20    1.30 
   4  -5   2   11.70    1.00 
  -4   5  -2   15.40    2.10 
   4   5   2   11.10    1.00 
   5  -5   2  312.37   13.30 
  -5  -5  -2  313.37   13.50 
  -5  -5  -2  316.17   14.10 
   5  -5   2  319.97   13.20 
  -5   5  -2  326.77   14.10 
   5   5   2  315.17   13.20 
  -6  -5  -2   37.30    3.20 
   6  -5   2   41.10    2.20 
  -6  -5  -2   36.00    2.60 
   6  -5   2   40.90    2.30 
  -6   5  -2   41.60    3.80 
   6   5   2   39.90    2.20 
   7  -5   2    0.40    0.50 
  -7  -5  -2   -0.10    0.70 
   7  -5   2    1.00    0.60 
  -7  -5  -2    0.50    0.70 
   7   5   2    0.10    0.50 
  -7   5  -2    0.80    1.10 
   8  -5   2   46.10    2.60 
   8  -5   2   45.20    2.70 
  -8  -5  -2   44.10    3.90 
   8   5   2   45.30    2.60 
   8   5   2   48.10    3.30 
  -8   5  -2   47.10    4.60 
   9  -5   2   54.29    3.00 
  -9  -5  -2   46.70    4.40 
   9  -5   2   51.19    2.90 
   9   5   2   50.59    2.90 
   9   5   2   51.09    3.60 
  -9   5  -2   47.50    5.00 
 -10  -5  -2   15.30    3.40 
  10  -5   2   11.70    1.60 
  10  -5   2   15.30    1.70 
 -10   5  -2   13.80    3.80 
  10   5   2   15.60    2.30 
  10   5   2   12.40    1.70 
  11  -5   2   73.89    4.20 
 -11  -5  -2   77.89    6.20 
  11  -5   2   83.19    4.20 
 -11   5  -2   74.99    6.10 
  11   5   2   77.89    4.20 
  12  -5   2   20.80    2.20 
 -12  -5  -2   25.10    4.70 
 -12   5  -2   18.70    2.20 
  12   5   2   20.70    2.20 
 -13  -5  -2   24.70    5.50 
  13  -5   2   18.20    2.20 
  13   5   2   17.30    2.30 
 -13   5  -2   18.20    2.30 
  14  -5   2    7.00    1.50 
 -14  -5  -2   10.60    3.10 
 -14   5  -2   10.90    2.30 
  14   5   2   11.20    2.20 
  15  -5   2   15.70    2.40 
 -15  -5  -2   27.00    6.50 
 -15   5  -2   14.60    2.50 
  15   5   2   16.20    2.60 
 -15  -6   2   43.30    6.40 
  15  -6  -2   30.50    2.90 
  15  -6  -2   32.90    3.00 
 -15   6   2   44.90    6.80 
  15   6  -2   32.70    3.10 
  14  -6  -2   21.30    2.50 
  14  -6  -2   26.30    2.60 
 -14  -6   2   32.10    5.60 
  14   6  -2   25.30    2.60 
 -14   6   2   22.30    5.20 
  13  -6  -2    8.20    1.80 
  13  -6  -2    4.30    1.20 
  13   6  -2    5.40    1.30 
 -13   6   2    2.30    1.80 
  12  -6  -2    0.40    0.80 
  12  -6  -2   -0.50    0.80 
  12   6  -2   -0.10    0.90 
 -12   6   2   -0.40    1.50 
  11  -6  -2    4.70    1.10 
 -11  -6   2    9.30    2.10 
  11  -6  -2    4.10    1.00 
 -11  -6   2    3.00    1.40 
 -11   6   2    3.10    1.70 
  11   6  -2    7.30    1.60 
  10  -6  -2   71.79    3.80 
  10  -6  -2   74.69    3.80 
 -10  -6   2   71.19    4.40 
 -10  -6   2   75.59    5.60 
  10   6  -2   70.09    3.90 
 -10   6   2   73.59    6.40 
   9  -6  -2   81.49    3.90 
  -9  -6   2   69.29    4.50 
   9  -6  -2   75.99    3.90 
  -9  -6   2   71.59    5.30 
  -9   6   2   83.09    6.60 
   9   6  -2   79.99    3.90 
   8  -6  -2  126.99    5.60 
  -8  -6   2  128.09    6.90 
  -8  -6   2  113.79    6.10 
   8  -6  -2  121.49    5.60 
   8   6  -2  120.79    5.60 
  -8   6   2  126.59    7.60 
  -7  -6   2   14.20    2.50 
   7  -6  -2   14.00    1.30 
   7  -6  -2   15.40    1.40 
  -7  -6   2   13.70    2.10 
   7   6  -2   14.90    1.30 
  -7   6   2   18.80    3.30 
   6  -6  -2   19.30    1.30 
  -6  -6   2   16.40    2.30 
   6  -6  -2   17.30    1.40 
  -6  -6   2   14.60    2.20 
  -6   6   2   21.70    2.70 
   6   6  -2   18.90    1.40 
  -5  -6   2   21.70    2.20 
  -5  -6   2   18.10    2.30 
   5  -6  -2   21.70    1.30 
   5  -6  -2   19.40    1.40 
   5   6  -2   19.90    1.30 
  -5   6   2   16.50    1.40 
  -5   6   2   23.80    2.50 
  -4  -6   2  405.56   16.60 
   4  -6  -2  371.06   15.90 
  -4  -6   2  385.96   16.40 
   4  -6  -2  391.06   15.90 
  -4   6   2  412.76   16.80 
   4   6  -2  378.56   15.90 
  -4   6   2  363.56   16.00 
  -3  -6   2   93.29    4.70 
   3  -6  -2  101.09    4.70 
   3  -6  -2   88.19    4.20 
  -3  -6   2   90.49    4.70 
   3  -6  -2   91.69    4.10 
   3  -6  -2   96.29    4.10 
   3   6  -2   88.59    4.10 
  -2  -6   2  491.35   21.20 
   2  -6  -2  520.85   20.90 
   2  -6  -2  526.75   21.30 
   2  -6  -2  476.95   20.70 
  -2  -6   2  568.94   21.30 
   2  -6  -2  482.85   20.70 
   2   6  -2  516.15   20.60 
   2   6  -2  489.95   20.80 
   1  -6  -2   58.99    2.70 
   1  -6  -2   64.89    2.70 
  -1  -6   2   62.19    3.40 
  -1  -6   2   56.49    2.80 
   1  -6  -2   59.09    3.30 
  -1  -6   2   58.99    3.10 
   1  -6  -2   62.49    3.10 
   1   6  -2   62.99    2.70 
   0  -6   2   62.29    3.20 
   0  -6  -2   61.89    2.50 
   0  -6   2   58.59    2.90 
   0  -6  -2   55.09    3.00 
   0  -6   2   51.59    2.50 
   0  -6   2   51.09    2.60 
   0  -6  -2   53.99    3.10 
   0   6   2   56.79    2.50 
  -1  -6  -2   46.40    1.90 
  -1  -6  -2   45.00    2.60 
   1  -6   2   45.50    2.40 
  -1  -6  -2   38.30    2.70 
   1  -6   2   40.40    2.10 
   1  -6   2   37.30    2.00 
   1   6   2   42.60    2.00 
   2  -6   2  210.38    9.30 
  -2  -6  -2  215.58    9.70 
  -2  -6  -2  225.48    8.80 
  -2  -6  -2  236.18    9.50 
   2  -6   2  206.38    9.00 
   2  -6   2  203.68    9.10 
   2   6   2  216.38    9.00 
  -3  -6  -2  154.28    7.30 
   3  -6   2  157.48    6.70 
  -3  -6  -2  147.29    7.00 
   3  -6   2  151.28    6.60 
   3  -6   2  148.89    6.50 
  -3   6  -2  159.98    7.10 
   3   6   2  150.88    6.50 
  -4  -6  -2    1.40    0.70 
   4  -6   2    2.30    0.60 
   4  -6   2    1.60    0.50 
  -4  -6  -2    1.30    0.70 
   4  -6   2    2.30    0.60 
  -4   6  -2    1.50    0.70 
   4   6   2    2.80    0.50 
   5  -6   2    1.50    0.60 
  -5  -6  -2    1.20    0.70 
  -5  -6  -2    1.10    0.70 
   5  -6   2    2.30    0.60 
   5  -6   2    2.20    0.60 
   5   6   2    2.60    0.60 
  -5   6  -2    1.50    0.80 
   6  -6   2  357.96   14.50 
   6  -6   2  345.97   14.50 
  -6  -6  -2  343.87   15.50 
  -6  -6  -2  322.57   14.80 
   6   6   2  354.66   14.50 
  -6   6  -2  351.56   15.60 
  -7  -6  -2   67.39    4.60 
   7  -6   2   66.89    3.40 
   7  -6   2   66.29    3.40 
  -7  -6  -2   63.69    3.90 
  -7   6  -2   66.69    5.10 
   7   6   2   63.19    3.30 
   8  -6   2   52.49    3.10 
   8  -6   2   58.99    3.10 
  -8  -6  -2   52.39    4.40 
  -8   6  -2   56.19    5.10 
   8   6   2   59.29    3.80 
   8   6   2   56.29    3.10 
   9  -6   2  111.39    5.40 
   9  -6   2  118.19    5.50 
  -9  -6  -2  109.49    6.90 
   9   6   2  115.69    5.40 
   9   6   2  115.09    6.20 
  -9   6  -2  106.69    7.20 
  10  -6   2   40.90    2.80 
 -10  -6  -2   45.30    4.70 
  10  -6   2   45.30    2.90 
 -10   6  -2   42.70    5.00 
  10   6   2   47.00    3.60 
  10   6   2   46.00    2.90 
  11  -6   2    9.00    1.70 
  11  -6   2    6.70    1.20 
 -11  -6  -2    6.00    1.80 
 -11   6  -2    4.20    1.60 
  11   6   2    4.30    1.50 
  11   6   2    7.10    1.60 
 -12  -6  -2   20.20    4.70 
  12  -6   2   19.90    2.10 
 -12   6  -2   27.20    4.60 
  12   6   2   16.30    2.10 
 -12   6  -2   18.20    2.30 
  13  -6   2   17.30    2.20 
 -13  -6  -2   18.70    5.10 
  13   6   2   17.00    2.30 
 -13   6  -2   14.70    2.40 
 -14  -6  -2   22.60    5.80 
  14  -6   2   11.90    2.10 
  14   6   2   11.60    2.20 
 -14   6  -2   11.90    2.40 
 -15  -6  -2   31.30    6.20 
 -16  -7   2   52.19    7.50 
  16  -7  -2   37.80    3.30 
  16  -7  -2   35.30    3.30 
  16   7  -2   41.00    3.60 
  15  -7  -2   10.60    2.40 
  15   7  -2   10.40    2.40 
 -15   7   2   24.00    5.80 
  14  -7  -2   73.09    4.30 
  14  -7  -2   77.49    4.40 
 -14  -7   2   72.09    7.30 
  14   7  -2   78.39    4.50 
 -14   7   2   61.59    7.00 
  13  -7  -2    3.70    1.20 
  13  -7  -2    1.90    1.10 
 -13  -7   2    5.50    2.40 
 -13   7   2   -0.30    1.70 
  13   7  -2    3.00    1.20 
  12  -7  -2    2.60    1.10 
  12  -7  -2    2.40    1.00 
 -12  -7   2    3.20    1.80 
 -12  -7   2    2.20    1.00 
 -12   7   2   -0.80    1.60 
  12   7  -2    1.30    1.00 
  11  -7  -2  104.79    5.00 
  11  -7  -2   97.09    4.90 
 -11  -7   2   98.49    5.50 
 -11  -7   2   96.89    7.00 
  11   7  -2   98.89    5.10 
 -11   7   2   94.09    7.50 
 -10  -7   2  279.27   14.20 
  10  -7  -2  288.07   12.70 
 -10  -7   2  299.27   13.20 
  10  -7  -2  309.67   12.70 
 -10   7   2  284.67   14.80 
  10   7  -2  303.67   12.80 
  -9  -7   2   19.30    2.70 
   9  -7  -2   24.40    1.90 
   9  -7  -2   24.20    2.00 
  -9   7   2   26.50    5.00 
   9   7  -2   22.60    2.00 
  -8  -7   2   97.69    6.20 
   8  -7  -2  107.79    4.90 
  -8  -7   2  100.09    5.60 
   8  -7  -2  104.39    4.90 
  -8   7   2  111.69    7.00 
   8   7  -2  106.69    5.00 
   7  -7  -2   14.40    1.30 
  -7  -7   2   15.50    2.60 
  -7  -7   2   13.80    2.40 
   7  -7  -2   14.60    1.40 
   7   7  -2   15.20    1.40 
  -7   7   2   19.50    3.30 
  -6  -7   2  326.17   14.40 
   6  -7  -2  318.57   13.40 
  -6  -7   2  311.97   13.90 
   6  -7  -2  326.87   13.40 
   6   7  -2  314.27   13.40 
  -6   7   2  324.97   14.50 
  -6   7   2  320.37   13.30 
   5  -7  -2   49.80    2.40 
  -5  -7   2   42.90    3.20 
   5  -7  -2   46.20    2.50 
  -5  -7   2   47.70    3.40 
   5   7  -2   49.80    2.50 
  -5   7   2   52.59    3.60 
  -5   7   2   45.00    2.50 
  -4  -7   2    1.10    0.80 
   4  -7  -2    2.00    0.60 
   4  -7  -2    1.80    0.50 
  -4  -7   2    1.30    0.60 
   4   7  -2    2.90    0.70 
  -4   7   2    1.00    0.70 
  -4   7   2    0.90    0.50 
  -3  -7   2  148.39    6.90 
   3  -7  -2  152.08    6.50 
   3  -7  -2  151.28    6.90 
  -3  -7   2  148.29    7.00 
   3  -7  -2  138.69    6.30 
   3  -7  -2  142.49    6.20 
   3   7  -2  143.79    6.30 
   2  -7  -2    1.80    0.60 
  -2  -7   2    1.50    0.50 
  -2  -7   2    0.90    0.80 
   2  -7  -2    1.70    0.40 
   2  -7  -2    1.10    0.60 
   2  -7  -2    1.70    0.50 
   2   7  -2    1.70    0.40 
   2   7  -2    1.80    0.50 
   1  -7  -2  137.79    6.20 
  -1  -7   2  142.09    6.80 
  -1  -7   2  135.39    6.30 
   1  -7  -2  148.49    6.80 
   1  -7  -2  149.19    6.60 
   1  -7  -2  156.98    6.20 
  -1  -7   2  153.68    6.70 
   0  -7  -2 1182.68   44.40 
   0  -7  -2 1084.19   45.10 
   0  -7   2 1018.70   44.40 
   0  -7  -2 1137.99   44.90 
   0  -7   2 1149.19   44.90 
   0  -7   2 1082.99   44.90 
   0  -7   2 1031.80   44.60 
   0   7   2 1111.09   44.40 
  -1  -7  -2   62.99    2.70 
  -1  -7  -2   64.09    3.40 
   1  -7   2   65.99    3.50 
  -1  -7  -2   58.09    3.60 
   1  -7   2   54.49    2.80 
   1  -7   2   58.39    2.90 
   1  -7   2   62.09    3.20 
   1   7   2   59.79    2.80 
   2  -7   2  952.60   40.60 
   2  -7   2  933.21   40.30 
  -2  -7  -2  977.00   41.10 
   2  -7   2 1016.80   40.70 
   2  -7   2  965.20   40.40 
  -2  -7  -2 1071.89   40.10 
  -2  -7  -2 1050.49   40.80 
   2   7   2 1000.00   40.30 
  -3  -7  -2   61.69    3.70 
  -3  -7  -2   51.89    3.30 
   3  -7   2   52.49    3.20 
   3  -7   2   53.99    2.80 
   3  -7   2   57.89    2.80 
  -3   7  -2   61.19    3.40 
   3   7   2   57.69    2.70 
   4  -7   2    4.00    0.90 
   4  -7   2    3.20    0.80 
   4  -7   2    3.40    0.80 
  -4  -7  -2    1.80    0.80 
  -4  -7  -2    3.50    0.90 
  -4   7  -2    2.30    0.80 
   4   7   2    3.90    0.70 
   5  -7   2   21.50    1.50 
  -5  -7  -2   17.60    2.20 
  -5  -7  -2   21.70    2.60 
   5  -7   2   15.40    1.70 
   5  -7   2   21.90    1.60 
   5   7   2   21.00    1.40 
  -5   7  -2   24.50    2.80 
   6  -7   2   83.99    4.00 
   6  -7   2   86.99    4.00 
  -6  -7  -2   78.69    5.10 
  -6  -7  -2   77.19    4.50 
   6   7   2   79.69    3.90 
  -6   7  -2   83.89    5.40 
  -7  -7  -2   63.89    4.10 
  -7  -7  -2   65.29    4.80 
   7  -7   2   72.09    3.60 
   7  -7   2   69.59    3.60 
   7   7   2   71.19    3.50 
  -7   7  -2   72.09    5.50 
   8  -7   2  185.08    8.40 
   8  -7   2  198.38    8.40 
  -8  -7  -2  179.18    8.90 
  -8  -7  -2  187.58    9.80 
  -8   7  -2  188.48   10.10 
   8   7   2  190.38    8.40 
   9  -7   2   24.20    2.10 
  -9  -7  -2   26.90    3.90 
   9  -7   2   25.70    2.10 
   9   7   2   27.00    2.10 
  -9   7  -2   25.10    4.40 
   9   7   2   26.60    3.10 
  10  -7   2   32.60    2.40 
  10  -7   2   34.00    2.50 
 -10  -7  -2   28.00    4.40 
  10   7   2   31.70    2.40 
  10   7   2   31.50    3.20 
 -10   7  -2   29.00    4.70 
  11  -7   2   12.70    1.80 
  11  -7   2   15.50    2.00 
 -11  -7  -2   18.40    4.50 
 -11   7  -2   11.70    4.30 
  11   7   2   14.20    2.70 
  11   7   2   13.50    1.90 
 -12  -7  -2    8.00    2.50 
  12  -7   2    7.50    1.80 
 -12   7  -2   12.00    4.20 
  12   7   2    6.90    1.40 
 -13  -7  -2   27.70    6.00 
  13  -7   2   19.90    2.40 
  13   7   2   24.90    2.60 
 -13   7  -2   22.60    2.70 
  16  -8  -2   23.10    2.90 
  16  -8  -2   21.40    2.80 
 -14  -8   2   39.30    6.50 
  14  -8  -2   38.40    3.20 
  14  -8  -2   35.00    3.00 
  14   8  -2   38.00    3.20 
 -14   8   2   29.80    6.00 
  13  -8  -2   35.70    2.80 
  13  -8  -2   36.90    3.00 
 -13  -8   2   43.60    6.20 
  13   8  -2   39.40    3.00 
 -13   8   2   23.40    5.60 
  12  -8  -2   38.50    2.80 
  12  -8  -2   34.00    2.60 
 -12  -8   2   31.60    5.30 
 -12  -8   2   41.40    3.50 
 -12   8   2   29.20    5.40 
  12   8  -2   35.70    2.80 
  11  -8  -2    4.60    1.10 
 -11  -8   2    3.60    1.70 
  11  -8  -2    5.20    1.20 
 -11  -8   2    4.20    1.20 
 -11   8   2    1.60    1.80 
  11   8  -2    5.80    1.20 
  10  -8  -2   15.40    1.90 
 -10  -8   2   19.80    4.00 
  10  -8  -2   12.50    1.70 
 -10  -8   2   14.10    2.60 
 -10   8   2   13.80    4.80 
  10   8  -2   15.20    1.80 
  -9  -8   2  187.28   10.00 
   9  -8  -2  186.38    8.40 
  -9  -8   2  168.18    9.00 
   9  -8  -2  194.98    8.50 
  -9   8   2  201.68   10.80 
   9   8  -2  199.28    8.50 
  -8  -8   2   12.60    3.10 
   8  -8  -2    7.20    1.30 
   8  -8  -2    5.90    1.40 
  -8  -8   2    5.60    1.40 
   8   8  -2   10.20    1.40 
  -8   8   2    9.70    3.70 
   7  -8  -2   88.09    4.20 
  -7  -8   2   85.49    5.00 
  -7  -8   2   82.59    5.40 
   7  -8  -2   84.79    4.20 
  -7   8   2   90.19    5.80 
   7   8  -2   90.39    4.20 
  -6  -8   2    1.00    0.80 
  -6  -8   2    0.50    0.90 
   6  -8  -2    1.40    0.60 
   6  -8  -2    0.70    0.60 
   6   8  -2    1.30    0.60 
  -6   8   2    1.20    0.90 
  -6   8   2    0.30    0.40 
  -5  -8   2   16.30    2.50 
   5  -8  -2   19.50    1.40 
  -5  -8   2   19.60    2.40 
   5  -8  -2   16.80    1.40 
  -5   8   2   18.10    1.50 
   5   8  -2   19.60    1.40 
  -5   8   2   22.80    2.60 
   4  -8  -2    1.90    0.50 
  -4  -8   2    0.70    0.70 
  -4  -8   2    0.80    0.90 
   4  -8  -2    1.50    0.70 
   4  -8  -2    1.00    0.50 
   4   8  -2    1.10    0.50 
   3  -8  -2   15.00    1.60 
   3  -8  -2   18.40    1.20 
   3  -8  -2   15.60    1.20 
  -3  -8   2   17.30    2.00 
   3  -8  -2   18.80    2.00 
  -3  -8   2   17.70    2.30 
   3   8  -2   16.90    1.20 
   2  -8  -2  294.17   12.70 
   2  -8  -2  317.27   13.50 
   2  -8  -2  316.17   13.10 
   2  -8  -2  300.57   12.70 
  -2  -8   2  320.37   13.40 
  -2  -8   2  303.67   13.40 
   2   8  -2  300.17   12.80 
   2   8  -2  312.77   12.60 
   1  -8  -2  307.07   13.50 
  -1  -8   2  303.87   13.60 
   1  -8  -2  329.07   14.20 
  -1  -8   2  329.57   14.00 
  -1  -8   2  362.36   14.20 
   1  -8  -2  321.87   13.40 
   1  -8  -2  337.07   13.90 
   0  -8  -2   87.89    4.70 
   0  -8   2   97.09    4.80 
   0  -8  -2   91.89    4.50 
   0  -8   2   91.69    4.50 
   0  -8   2   84.09    3.90 
   0  -8  -2   89.49    3.90 
   0  -8   2   84.49    4.10 
   0   8   2   91.19    4.00 
   1  -8   2   56.49    3.40 
  -1  -8  -2   51.29    3.40 
   1  -8   2   54.69    3.00 
   1  -8   2   46.80    2.50 
  -1  -8  -2   50.49    2.30 
   1  -8   2   50.69    2.60 
  -1  -8  -2   54.79    3.20 
   1   8   2   53.19    2.50 
  -2  -8  -2  183.58    8.70 
   2  -8   2  182.68    8.20 
   2  -8   2  183.88    8.20 
  -2  -8  -2  197.18    8.40 
   2  -8   2  170.08    7.80 
   2  -8   2  178.28    7.90 
  -2  -8  -2  187.78    7.50 
   2   8   2  183.08    7.70 
   3  -8   2  181.28    8.00 
   3  -8   2  181.68    8.30 
  -3  -8  -2  202.98    8.70 
   3  -8   2  183.48    8.10 
  -3  -8  -2  187.18    9.00 
   3   8   2  188.08    7.90 
  -3   8  -2  189.88    8.70 
   4  -8   2   97.09    4.60 
   4  -8   2   99.99    4.70 
  -4  -8  -2   99.49    5.60 
  -4  -8  -2  107.99    5.30 
   4  -8   2   94.49    4.80 
   4   8   2  101.09    4.50 
  -4   8  -2  103.09    5.30 
  -5  -8  -2    0.60    0.70 
   5  -8   2    1.10    0.60 
  -5  -8  -2    0.50    0.80 
   5  -8   2    0.00    0.70 
   5  -8   2    0.80    0.60 
  -5   8  -2    1.00    0.90 
   5   8   2    0.90    0.50 
   6  -8   2   27.70    1.90 
  -6  -8  -2   26.70    2.80 
  -6  -8  -2   28.20    3.20 
   6  -8   2   27.20    1.90 
  -6   8  -2   27.20    3.50 
   6   8   2   27.30    1.80 
   7  -8   2  168.28    7.70 
   7  -8   2  183.18    7.70 
  -7  -8  -2  165.68    8.30 
  -7  -8  -2  165.18    8.90 
   7   8   2  179.18    7.60 
  -7   8  -2  165.68    9.30 
  -8  -8  -2    0.00    1.00 
   8  -8   2   -0.30    0.70 
  -8  -8  -2   -0.20    1.00 
   8  -8   2    0.40    0.80 
   8   8   2    1.20    0.80 
  -8   8  -2    0.60    1.40 
  -9  -8  -2    3.90    1.50 
   9  -8   2    6.90    1.50 
   9  -8   2    5.40    1.10 
   9   8   2    6.50    1.40 
   9   8   2    4.50    1.30 
  -9   8  -2    2.10    1.50 
  10  -8   2    2.60    0.90 
  10  -8   2    3.50    1.10 
 -10  -8  -2    1.80    1.40 
 -10   8  -2    1.60    1.60 
  10   8   2    1.60    1.20 
  10   8   2    3.30    1.00 
  11  -8   2   42.90    3.00 
 -11  -8  -2   43.40    5.80 
  11  -8   2   37.20    2.80 
  11   8   2   41.50    3.90 
 -11   8  -2   36.50    5.30 
  11   8   2   38.80    2.90 
 -12  -8  -2    4.20    2.30 
  12  -8   2    4.00    1.20 
 -12   8  -2    1.00    1.60 
  12   8   2    5.60    1.30 
  13  -8   2    9.10    2.00 
 -13  -8  -2   18.20    5.80 
 -13   8  -2   10.30    2.30 
  13   8   2   10.80    2.20 
 -14  -8  -2    3.00    2.80 
  15  -9  -2   40.90    3.30 
  15  -9  -2   42.60    3.60 
 -15   9   2   30.70    6.40 
  15   9  -2   46.00    3.60 
  14  -9  -2    1.20    1.20 
  14   9  -2    4.90    1.40 
 -14   9   2    0.30    2.10 
 -13  -9   2    2.70    2.40 
  13  -9  -2    1.30    1.10 
  13  -9  -2    3.70    1.30 
 -13   9   2   -0.60    1.90 
  13   9  -2    2.10    1.20 
 -12  -9   2    1.60    1.10 
  12  -9  -2    1.30    1.00 
  12  -9  -2    0.40    1.10 
 -12  -9   2    1.30    2.00 
 -12   9   2   -2.20    1.60 
  12   9  -2   -0.40    0.90 
  11  -9  -2   31.30    2.60 
  11  -9  -2   27.80    2.30 
 -11  -9   2   30.20    3.30 
 -11  -9   2   31.70    5.20 
  11   9  -2   29.50    2.60 
 -11   9   2   18.90    5.20 
 -10  -9   2   28.70    3.40 
  10  -9  -2   29.70    2.30 
 -10  -9   2   38.00    5.00 
  10  -9  -2   28.00    2.40 
  10   9  -2   28.20    2.40 
 -10   9   2   31.70    5.50 
   9  -9  -2   29.50    2.30 
  -9  -9   2   35.10    4.30 
   9  -9  -2   34.50    2.30 
  -9  -9   2   29.50    3.30 
   9   9  -2   31.90    2.30 
  -9   9   2   30.70    4.80 
  -8  -9   2   20.60    2.90 
   8  -9  -2   23.90    1.90 
   8  -9  -2   24.80    2.00 
  -8  -9   2   27.90    3.70 
   8   9  -2   27.70    2.10 
  -8   9   2   27.00    4.30 
  -7  -9   2   30.60    3.10 
   7  -9  -2   28.50    2.10 
   7  -9  -2   30.20    2.00 
  -7  -9   2   26.50    3.40 
  -7   9   2   33.60    3.90 
   7   9  -2   32.70    2.10 
  -6  -9   2   68.09    4.60 
  -6  -9   2   81.99    5.10 
   6  -9  -2   77.29    3.80 
   6  -9  -2   82.99    3.80 
   6   9  -2   80.29    3.80 
  -6   9   2   78.99    5.20 
  -6   9   2   66.79    3.80 
  -5  -9   2   69.69    4.40 
   5  -9  -2   69.69    3.40 
  -5  -9   2   69.99    4.50 
   5  -9  -2   71.69    3.40 
  -5   9   2   73.69    4.60 
   5   9  -2   69.69    3.40 
  -5   9   2   64.39    3.60 
  -4  -9   2    0.40    1.00 
   4  -9  -2    2.00    0.50 
   4  -9  -2    1.70    0.80 
  -4  -9   2    0.90    0.70 
   4  -9  -2    0.60    0.50 
   4   9  -2    1.70    0.60 
   3  -9  -2    0.70    0.60 
  -3  -9   2    1.00    1.00 
   3  -9  -2    0.60    0.70 
   3  -9  -2    1.30    0.50 
  -3  -9   2    1.40    0.70 
   3  -9  -2    1.10    0.50 
   3   9  -2    1.40    0.40 
   3   9  -2    1.00    0.50 
   2  -9  -2  220.78    9.90 
  -2  -9   2  226.58    9.90 
   2  -9  -2  207.68    9.10 
  -2  -9   2  216.98    9.80 
   2  -9  -2  200.68    9.10 
   2  -9  -2  227.98    9.50 
   2   9  -2  213.98    9.20 
   2   9  -2  216.78    9.00 
   1  -9  -2  152.38    7.50 
  -1  -9   2  159.68    7.30 
   1  -9  -2  164.08    7.20 
   1  -9  -2  156.18    6.60 
  -1  -9   2  155.58    6.90 
   1  -9  -2  150.38    6.70 
   0  -9   2   33.60    2.00 
   0  -9   2   36.60    2.20 
   0  -9  -2   45.00    2.90 
   0  -9   2   39.70    2.70 
   0  -9  -2   40.70    3.00 
   0  -9  -2   38.80    2.00 
   0  -9   2   44.70    3.20 
   0   9   2   37.90    2.00 
   1  -9   2  797.12   32.00 
   1  -9   2  717.73   31.40 
   1  -9   2  729.73   31.60 
  -1  -9  -2  770.62   31.30 
  -1  -9  -2  817.62   32.10 
  -1  -9  -2  785.52   32.40 
   1  -9   2  799.92   32.00 
   1   9   2  771.62   31.40 
  -2  -9  -2  392.36   17.20 
   2  -9   2  368.06   16.20 
   2  -9   2  391.36   16.70 
   2  -9   2  421.76   16.70 
  -2  -9  -2  404.76   16.80 
   2  -9   2  384.66   16.30 
  -2  -9  -2  388.36   15.90 
   2   9   2  383.86   16.10 
  -3  -9  -2   35.40    3.00 
  -3  -9  -2   30.50    2.70 
   3  -9   2   34.80    2.70 
   3  -9   2   32.20    2.00 
   3  -9   2   34.50    2.00 
   3   9   2   31.20    1.80 
  -3   9  -2   35.60    2.70 
   4  -9   2    6.80    1.10 
  -4  -9  -2    4.70    1.10 
  -4  -9  -2    7.80    2.20 
   4  -9   2    8.90    1.20 
   4  -9   2    6.80    1.90 
   4   9   2    8.90    1.00 
  -4   9  -2    7.70    2.00 
  -5  -9  -2  160.08    7.90 
  -5  -9  -2  170.58    8.50 
   5  -9   2  143.69    7.20 
   5  -9   2  164.38    7.30 
   5  -9   2  161.18    7.20 
   5   9   2  165.48    7.10 
  -5   9  -2  172.98    8.20 
   6  -9   2    4.60    0.90 
  -6  -9  -2    2.60    1.10 
   6  -9   2    4.90    0.90 
  -6  -9  -2    2.50    1.20 
   6   9   2    5.70    1.10 
  -6   9  -2    2.60    1.20 
  -7  -9  -2    3.10    1.20 
   7  -9   2    5.70    1.40 
   7  -9   2    7.10    1.40 
  -7  -9  -2    5.00    1.30 
   7   9   2    6.40    1.30 
  -7   9  -2    3.60    1.50 
  -8  -9  -2    0.40    1.00 
   8  -9   2    0.80    0.80 
  -8  -9  -2   -0.60    1.10 
   8  -9   2   -0.50    0.80 
   8   9   2    0.60    0.70 
  -8   9  -2   -1.00    1.40 
   9  -9   2   -0.30    0.80 
  -9  -9  -2    0.40    1.30 
   9  -9   2    0.80    0.90 
   9   9   2    0.30    0.80 
  -9   9  -2    0.30    1.60 
   9   9   2   -0.10    1.10 
  10  -9   2    4.30    1.10 
 -10  -9  -2   12.70    4.30 
  10  -9   2    5.10    1.20 
 -10   9  -2    1.80    1.70 
  10   9   2    4.50    1.10 
  10   9   2    2.10    1.30 
  11  -9   2   45.50    3.20 
  11  -9   2   56.19    3.50 
 -11  -9  -2   49.40    5.80 
  11   9   2   47.80    4.30 
 -11   9  -2   41.90    5.70 
  11   9   2   52.89    3.30 
 -12  -9  -2   18.10    5.70 
  12  -9   2   13.50    2.10 
  12   9   2   14.40    2.20 
  13  -9   2   65.49    4.30 
 -13  -9  -2   81.79    7.80 
  13   9   2   71.49    4.40 
 -13   9  -2   69.79    4.60 
 -13   9  -2   69.99    7.00 
 -14   9  -2   30.60    6.10 
  15 -10  -2   10.30    2.40 
  15 -10  -2   12.40    2.80 
  15  10  -2   13.40    2.80 
 -14 -10   2    1.30    2.70 
  14 -10  -2    0.80    1.20 
  14 -10  -2    2.30    1.50 
  14  10  -2   -0.50    1.20 
 -14  10   2   -2.10    2.10 
  13 -10  -2    3.00    1.30 
 -13 -10   2    3.50    2.70 
  13 -10  -2    2.80    1.20 
 -13  10   2   -0.80    2.00 
  13  10  -2    1.40    1.20 
 -12 -10   2    8.30    2.80 
  12 -10  -2    8.80    1.90 
  12 -10  -2    8.90    2.10 
  12  10  -2    8.30    1.60 
 -11 -10   2   22.10    5.30 
 -11  10   2   13.20    5.20 
  10 -10  -2  122.79    5.90 
  10 -10  -2  129.09    6.00 
 -10 -10   2  113.59    6.80 
 -10 -10   2  124.19    8.20 
  10  10  -2  124.99    6.00 
 -10  10   2  106.19    8.40 
   9 -10  -2   11.00    1.70 
  -9 -10   2   12.20    3.90 
   9 -10  -2    9.20    1.50 
  -9 -10   2   10.00    2.90 
  -9  10   2    5.60    1.90 
   9  10  -2   10.70    1.70 
  -8 -10   2   36.60    3.50 
   8 -10  -2   35.80    2.50 
  -8 -10   2   38.20    4.30 
   8 -10  -2   38.30    2.50 
   8  10  -2   39.40    2.50 
  -8  10   2   36.30    4.60 
  -7 -10   2   20.90    3.20 
  -7 -10   2   24.00    3.50 
   7 -10  -2   22.30    1.80 
   7 -10  -2   21.30    1.90 
   7  10  -2   25.10    1.90 
  -7  10   2   22.60    3.70 
   6 -10  -2   14.60    1.60 
  -6 -10   2   16.60    3.00 
  -6 -10   2   14.30    2.70 
   6 -10  -2   16.10    1.50 
  -6  10   2   19.70    3.20 
   6  10  -2   16.20    1.50 
   5 -10  -2   20.70    1.60 
  -5 -10   2   23.10    2.90 
  -5 -10   2   20.40    3.00 
   5 -10  -2   20.20    1.70 
  -5  10   2   21.30    2.90 
  -5  10   2   18.00    1.90 
   5  10  -2   20.50    1.60 
   4 -10  -2   93.89    4.60 
  -4 -10   2   93.19    5.40 
   4 -10  -2   91.39    4.30 
   4 -10  -2   92.79    5.20 
   4 -10  -2   91.89    4.30 
  -4 -10   2   87.79    5.20 
   4  10  -2   88.39    4.30 
  -3 -10   2    5.40    1.90 
   3 -10  -2    4.10    0.70 
   3 -10  -2    4.10    0.90 
   3 -10  -2    2.30    0.80 
  -3 -10   2    4.30    1.20 
   3 -10  -2    2.60    0.80 
   3  10  -2    5.80    0.60 
   3  10  -2    4.50    1.00 
   2 -10  -2   24.30    2.40 
   2 -10  -2   22.30    2.20 
  -2 -10   2   27.30    3.00 
  -2 -10   2   28.40    2.50 
   2 -10  -2   24.80    1.60 
   2 -10  -2   25.90    1.60 
   2  10  -2   26.80    1.70 
   2  10  -2   26.20    1.50 
  -1 -10   2   19.30    2.10 
  -1 -10   2   15.10    1.50 
   1 -10  -2   15.90    2.20 
   1 -10  -2   18.20    2.20 
   1 -10  -2   18.20    1.30 
   1 -10  -2   19.20    1.30 
  -1 -10   2   19.10    2.70 
   0 -10   2  713.63   27.80 
   0 -10   2  676.73   27.70 
   0 -10  -2  663.83   27.90 
   0 -10  -2  664.63   27.60 
   0 -10   2  626.84   27.20 
   0 -10   2  623.34   27.00 
   0 -10  -2  661.23   26.90 
   0  10   2  670.63   27.00 
   1 -10   2   63.59    3.20 
  -1 -10  -2   72.39    4.10 
  -1 -10  -2   67.89    4.30 
   1 -10   2   68.19    3.90 
  -1 -10  -2   68.69    3.10 
   1 -10   2   65.19    3.40 
   1 -10   2   69.19    4.20 
   1  10   2   69.69    3.20 
  -2 -10  -2    2.30    1.00 
   2 -10   2    2.50    0.60 
   2 -10   2    1.10    1.00 
   2 -10   2    2.60    0.70 
  -2 -10  -2    1.70    0.80 
  -2 -10  -2    3.00    0.60 
   2 -10   2    1.70    0.70 
   2  10   2    5.10    0.80 
  -3 -10  -2   66.19    4.00 
   3 -10   2   60.79    3.10 
   3 -10   2   55.69    3.70 
  -3 -10  -2   61.19    4.20 
   3 -10   2   59.99    3.20 
   3  10   2   59.49    3.00 
  -3  10  -2   62.29    3.90 
   4 -10   2   27.80    1.90 
  -4 -10  -2   27.90    3.10 
   4 -10   2   27.90    1.90 
   4 -10   2   22.90    2.40 
  -4 -10  -2   26.50    2.90 
   4  10   2   26.90    1.70 
  -4  10  -2   27.90    2.80 
   5 -10   2    0.00    0.60 
  -5 -10  -2   -0.70    1.00 
   5 -10   2   -0.20    0.70 
   5 -10   2   -0.70    0.80 
  -5 -10  -2   -0.60    0.80 
  -5  10  -2    0.10    0.90 
   5  10   2   -0.50    0.50 
  -6 -10  -2   69.49    5.20 
  -6 -10  -2   69.09    4.60 
   6 -10   2   64.79    3.60 
   6 -10   2   64.89    3.60 
   6  10   2   68.19    3.50 
  -6  10  -2   68.09    4.90 
   7 -10   2   11.50    1.60 
  -7 -10  -2   11.50    3.50 
   7 -10   2   12.90    1.70 
  -7 -10  -2   11.80    2.60 
   7  10   2   14.60    1.60 
  -7  10  -2    9.90    3.60 
   8 -10   2  154.08    7.10 
  -8 -10  -2  157.48    8.00 
   8 -10   2  149.09    7.10 
  -8 -10  -2  153.58    8.90 
  -8  10  -2  140.59    9.00 
   8  10   2  152.38    7.00 
  -9 -10  -2    0.60    1.40 
   9 -10   2    0.80    1.00 
   9 -10   2    0.60    0.90 
   9  10   2   -0.60    1.10 
  -9  10  -2   -1.30    1.50 
   9  10   2   -0.50    0.80 
 -10 -10  -2   37.80    5.40 
  10 -10   2   30.40    2.50 
  10 -10   2   34.90    2.80 
  10  10   2   29.40    2.50 
 -10  10  -2   28.40    5.20 
  10  10   2   25.90    3.60 
 -11 -10  -2    7.00    2.50 
  11 -10   2    5.70    1.40 
  11 -10   2    6.30    1.30 
  11  10   2    4.20    1.20 
  11  10   2    3.80    1.40 
 -11  10  -2    0.40    1.70 
 -12 -10  -2   38.40    6.60 
  12 -10   2   37.20    3.00 
  12  10   2   40.60    3.10 
 -12  10  -2   23.60    5.60 
  12  10   2   37.90    4.20 
 -13 -10  -2    2.20    2.60 
  13 -10   2    0.00    1.10 
 -13  10  -2    0.70    1.30 
  13  10   2    0.30    1.10 
 -13  10  -2    0.50    1.80 
 -14 -10  -2   25.30    6.50 
 -14  10  -2   19.30    6.10 
  14 -11  -2   14.70    2.70 
  14 -11  -2   14.50    2.40 
  14  11  -2   11.20    2.00 
  13 -11  -2    2.80    1.50 
  12 -11  -2    1.60    1.00 
  12 -11  -2    0.20    1.20 
 -12 -11   2    3.70    2.30 
  12  11  -2    1.30    1.10 
 -12  11   2   -2.00    1.90 
 -11 -11   2  124.49    9.00 
  11 -11  -2  134.99    6.40 
 -11 -11   2  135.69    7.50 
  11 -11  -2  122.79    6.20 
 -11  11   2  106.49    9.10 
  11  11  -2  124.49    6.30 
  10 -11  -2   22.60    2.20 
  10 -11  -2   28.60    2.50 
 -10 -11   2   30.10    5.30 
 -10 -11   2   27.60    3.70 
  10  11  -2   24.50    2.40 
 -10  11   2   14.40    5.10 
   9 -11  -2   12.30    1.60 
   9 -11  -2   10.60    1.90 
  -9 -11   2   12.80    3.30 
  -9 -11   2   13.90    4.30 
   9  11  -2   12.40    1.80 
  -8 -11   2   14.50    4.00 
  -8 -11   2   13.70    2.90 
   8 -11  -2   13.40    1.80 
   8 -11  -2   13.90    1.60 
  -8  11   2   12.20    3.90 
   8  11  -2   12.10    1.70 
   7 -11  -2    2.20    0.80 
  -7 -11   2    1.70    1.20 
   7 -11  -2    2.00    0.90 
  -7 -11   2    1.30    1.20 
  -7  11   2    2.10    1.30 
   7  11  -2    3.00    0.90 
  -6 -11   2    0.30    1.10 
  -6 -11   2    0.90    1.10 
   6 -11  -2    0.00    0.60 
   6 -11  -2   -0.40    0.70 
   6  11  -2   -0.30    0.70 
  -6  11   2    0.60    1.10 
  -5 -11   2    0.20    1.00 
  -5 -11   2   -0.30    1.10 
   5 -11  -2   -0.20    0.70 
   5 -11  -2    0.60    0.60 
   5  11  -2    0.10    0.60 
  -5  11   2    0.20    0.90 
  -5  11   2   -0.30    0.60 
   4 -11  -2   13.00    1.30 
  -4 -11   2   13.00    2.70 
   4 -11  -2   12.90    2.00 
  -4 -11   2   10.50    2.70 
   4 -11  -2   11.70    1.40 
   4 -11  -2   13.50    2.40 
   4  11  -2   11.80    1.30 
   3 -11  -2   13.00    2.00 
   3 -11  -2   12.20    1.30 
   3 -11  -2   15.60    2.40 
  -3 -11   2   15.00    2.50 
  -3 -11   2   15.70    2.90 
   3 -11  -2   13.10    1.30 
   3  11  -2   13.30    1.40 
   2 -11  -2  138.99    6.30 
  -2 -11   2  148.79    7.30 
   2 -11  -2  142.99    6.90 
  -2 -11   2  145.89    7.20 
   2 -11  -2  143.99    7.30 
   2 -11  -2  139.69    6.30 
   2  11  -2  145.39    6.20 
   2  11  -2  144.69    6.40 
   1 -11  -2  333.07   14.70 
   1 -11  -2  340.67   14.60 
   1 -11  -2  362.06   15.30 
  -1 -11   2  351.66   15.50 
  -1 -11   2  366.06   15.50 
   1 -11  -2  350.06   15.70 
   1  11  -2  370.76   14.70 
   1  11  -2  359.16   14.90 
   0 -11   2  276.57   12.30 
   0 -11   2  277.77   12.60 
   0 -11  -2  293.87   12.30 
   0 -11   2  324.07   13.30 
   0 -11  -2  306.97   13.10 
   0 -11  -2  297.47   13.40 
   0 -11   2  297.47   13.10 
   0  11   2  300.67   12.40 
  -1 -11  -2  348.07   14.80 
  -1 -11  -2  320.17   13.80 
   1 -11   2  376.66   14.80 
   1 -11   2  322.17   14.20 
  -1 -11  -2  336.57   15.10 
   1 -11   2  317.47   14.00 
   1 -11   2  346.17   14.80 
   1  11   2  328.97   14.00 
  -2 -11  -2   48.70    2.30 
   2 -11   2   45.70    2.60 
   2 -11   2   54.79    3.60 
   2 -11   2   47.60    2.70 
  -2 -11  -2   49.99    3.90 
   2 -11   2   47.60    3.30 
  -2 -11  -2   53.59    3.60 
   2  11   2   46.60    2.50 
  -3 -11  -2    0.30    0.90 
   3 -11   2   -0.30    0.60 
   3 -11   2   -0.40    1.00 
   3 -11   2   -0.20    0.60 
  -3 -11  -2   -1.20    0.90 
   3  11   2   -0.30    0.50 
  -4 -11  -2   34.20    3.80 
  -4 -11  -2   35.60    3.40 
   4 -11   2   36.20    3.00 
   4 -11   2   32.60    2.30 
   4 -11   2   38.90    2.40 
  -4  11  -2   39.60    3.30 
   4  11   2   37.10    2.20 
   5 -11   2   43.50    2.70 
  -5 -11  -2   41.70    4.30 
  -5 -11  -2   49.10    3.90 
   5 -11   2   42.30    2.70 
   5  11   2   44.60    2.50 
  -5  11  -2   46.10    4.00 
  -6 -11  -2    1.30    1.20 
   6 -11   2    1.70    0.90 
  -6 -11  -2    1.70    1.20 
   6 -11   2    1.70    0.90 
  -6  11  -2    0.60    1.20 
   6  11   2    2.30    0.80 
   7 -11   2    2.80    1.00 
   7 -11   2    1.70    0.90 
  -7 -11  -2    2.10    1.30 
  -7 -11  -2    1.80    1.40 
  -7  11  -2   -0.90    1.30 
   7  11   2    2.00    0.90 
   8 -11   2    0.20    0.90 
  -8 -11  -2    2.20    1.50 
  -8 -11  -2    2.50    1.30 
   8 -11   2    1.60    0.90 
  -8  11  -2   -1.10    1.50 
   8  11   2    0.30    0.80 
  -9 -11  -2    0.60    1.30 
  -9 -11  -2    0.10    1.60 
   9 -11   2    0.20    0.90 
   9 -11   2    0.70    1.00 
  -9  11  -2   -1.40    1.60 
   9  11   2    0.70    0.90 
   9  11   2   -1.00    1.20 
  10 -11   2    5.20    1.30 
 -10 -11  -2    5.20    2.30 
  10 -11   2    4.40    1.20 
  10  11   2    3.40    1.20 
  10  11   2    3.40    1.50 
 -10  11  -2   -0.20    1.80 
 -11 -11  -2   14.70    5.70 
  11 -11   2    2.70    1.20 
  11 -11   2    6.10    1.50 
  11  11   2    2.10    1.40 
  11  11   2    4.50    1.20 
  12 -11   2    6.80    1.50 
 -12 -11  -2   17.70    6.00 
  12  11   2    5.80    1.70 
 -12  11  -2    6.10    1.80 
  12  11   2    6.50    1.50 
 -12  11  -2    1.70    2.20 
  13 -11   2   22.20    2.60 
  13  11   2   23.10    2.80 
 -13  11  -2   11.30    4.40 
 -13  11  -2   19.10    3.10 
  14 -12  -2   19.80    2.60 
  14 -12  -2   26.40    3.30 
  14  12  -2   24.20    3.00 
 -13 -12   2    4.50    2.80 
  13 -12  -2    2.50    1.30 
  13 -12  -2    5.80    1.60 
 -13  12   2   -0.90    2.40 
  13  12  -2    4.40    1.50 
  12 -12  -2   17.60    2.30 
  12 -12  -2   23.50    2.90 
 -12 -12   2   23.00    6.20 
 -12 -12   2   32.50    4.40 
  12  12  -2   18.20    2.60 
 -11 -12   2   47.20    6.60 
  11 -12  -2   46.20    3.50 
  11 -12  -2   40.40    3.00 
 -11 -12   2   53.49    4.90 
 -11  12   2   33.00    6.40 
  11  12  -2   43.20    3.30 
  10 -12  -2   32.00    2.80 
  10 -12  -2   28.10    2.40 
  10  12  -2   34.60    2.80 
 -10  12   2   28.10    5.60 
   9 -12  -2    9.00    2.00 
  -9 -12   2   15.90    3.60 
   9 -12  -2   10.00    1.70 
  -9 -12   2   15.50    4.80 
   9  12  -2   10.40    1.80 
  -8 -12   2   18.40    3.50 
  -8 -12   2   20.20    4.50 
   8 -12  -2   19.60    1.90 
   8 -12  -2   21.00    2.20 
   8  12  -2   18.10    2.00 
  -8  12   2   20.80    4.30 
  -7 -12   2   17.30    4.00 
  -7 -12   2   18.90    3.40 
   7 -12  -2   20.70    2.00 
   7 -12  -2   16.70    1.70 
  -7  12   2   16.80    3.70 
   7  12  -2   15.70    1.80 
   6 -12  -2    0.60    0.70 
   6 -12  -2    0.40    0.80 
  -6 -12   2    0.30    1.20 
  -6 -12   2    2.00    1.30 
   6  12  -2    1.00    0.80 
  -6  12   2    0.70    1.10 
   5 -12  -2   17.40    1.80 
   5 -12  -2   19.30    1.70 
  -5 -12   2   17.10    3.20 
  -5 -12   2   19.80    3.20 
   5  12  -2   19.40    1.70 
  -5  12   2   18.80    2.30 
  -5  12   2   18.80    3.20 
   4 -12  -2   90.59    4.40 
   4 -12  -2   90.29    4.80 
   4 -12  -2   94.89    5.50 
   4 -12  -2   83.29    4.30 
  -4 -12   2   92.99    5.60 
  -4 -12   2   95.39    5.80 
   4  12  -2   92.59    4.40 
   3 -12  -2   57.99    3.70 
  -3 -12   2   62.49    4.40 
   3 -12  -2   58.89    3.10 
   3 -12  -2   60.59    4.20 
   3 -12  -2   58.49    3.10 
  -3 -12   2   62.59    4.50 
   3  12  -2   63.09    3.20 
   2 -12  -2   36.70    2.20 
  -2 -12   2   40.00    3.40 
   2 -12  -2   36.60    2.20 
  -2 -12   2   36.40    3.60 
   2 -12  -2   35.80    3.10 
   2 -12  -2   38.70    3.40 
   2  12  -2   39.20    2.40 
   2  12  -2   39.10    2.10 
   1 -12  -2    4.60    1.00 
   1 -12  -2    5.80    1.20 
  -1 -12   2    7.80    2.20 
  -1 -12   2    4.10    1.40 
   1 -12  -2    5.10    1.30 
   1 -12  -2    6.10    2.30 
   1  12  -2    8.20    1.30 
   1  12  -2    6.10    1.10 
   0 -12   2   45.40    2.80 
   0 -12   2   50.19    3.50 
   0 -12  -2   53.09    3.80 
   0 -12  -2   48.90    3.80 
   0 -12   2   46.20    2.50 
   0 -12   2   46.90    4.00 
   0 -12  -2   47.20    2.50 
   0  12   2   51.09    2.60 
  -1 -12  -2   59.39    2.90 
   1 -12   2   56.79    3.10 
   1 -12   2   60.09    3.30 
   1 -12   2   64.99    4.30 
  -1 -12  -2   64.89    4.40 
   1 -12   2   65.09    4.00 
  -1 -12  -2   59.59    4.10 
   1  12   2   58.59    3.00 
   2 -12   2   46.70    2.80 
  -2 -12  -2   46.30    3.90 
   2 -12   2   43.60    3.30 
  -2 -12  -2   41.60    3.60 
   2 -12   2   44.20    2.60 
   2 -12   2   52.19    3.70 
   2  12   2   46.30    2.50 
  -3 -12  -2   -0.90    1.00 
  -3 -12  -2    0.10    1.00 
   3 -12   2   -0.40    1.10 
   3 -12   2    0.50    0.70 
   3 -12   2    0.30    0.70 
   3  12   2    0.40    0.60 
   4 -12   2   30.20    2.20 
   4 -12   2   34.00    3.00 
  -4 -12  -2   32.60    3.90 
  -4 -12  -2   30.10    3.20 
   4 -12   2   30.10    2.20 
  -4  12  -2   33.20    3.30 
   4  12   2   32.00    2.00 
  -5 -12  -2   45.30    4.60 
   5 -12   2   43.10    2.70 
  -5 -12  -2   39.30    3.70 
   5 -12   2   42.00    2.70 
   5  12   2   43.20    2.50 
  -5  12  -2   39.50    3.90 
   6 -12   2   17.70    2.00 
  -6 -12  -2   21.70    4.30 
   6 -12   2   19.40    2.00 
  -6 -12  -2   20.40    3.40 
  -6  12  -2   13.30    3.50 
   6  12   2   23.00    1.90 
  -7 -12  -2    7.30    1.80 
  -7 -12  -2    3.90    1.80 
   7 -12   2    7.10    1.30 
   7 -12   2    7.30    1.30 
  -7  12  -2    3.30    1.60 
   7  12   2    8.30    1.50 
   8 -12   2   12.10    1.90 
   8 -12   2   13.40    2.10 
  -8 -12  -2   21.10    3.90 
  -8 -12  -2   18.80    5.00 
   8  12   2   12.70    1.80 
   9 -12   2    4.00    1.30 
  -9 -12  -2    3.40    2.20 
   9 -12   2    4.70    1.20 
   9  12   2    0.70    1.40 
   9  12   2    3.70    1.10 
 -10 -12  -2    0.30    2.00 
  10 -12   2    0.30    1.00 
  10 -12   2    0.50    1.10 
  10  12   2   -0.30    1.30 
  10  12   2    0.50    1.00 
 -10  12  -2   -1.40    1.80 
 -11 -12  -2   11.30    3.20 
  11 -12   2   11.60    2.20 
  11 -12   2    9.40    1.80 
  11  12   2   13.60    3.60 
  11  12   2   12.10    2.10 
  12 -12   2    3.60    1.40 
 -12 -12  -2    3.10    2.90 
  12  12   2    3.30    1.40 
  12  12   2    3.80    1.70 
 -12  12  -2    4.70    1.70 
  13 -12   2   17.50    2.70 
 -13 -12  -2   37.00    7.00 
  13  12   2   26.10    2.90 
 -13  12  -2   19.80    3.20 
  12 -13  -2    8.60    2.00 
  12 -13  -2   13.90    2.70 
  12  13  -2    8.70    1.70 
  11 -13  -2    5.90    1.30 
  11 -13  -2   10.10    2.30 
  11  13  -2    4.30    1.40 
 -11  13   2    1.00    2.30 
 -10 -13   2    7.60    2.70 
 -10 -13   2   16.60    3.70 
  10 -13  -2   11.60    2.40 
  10 -13  -2    9.20    1.80 
  10  13  -2    9.30    2.10 
   9 -13  -2    0.00    0.90 
   9 -13  -2    1.50    1.20 
  -9 -13   2    0.20    1.90 
  -9 -13   2    1.70    1.60 
   9  13  -2    1.40    1.00 
  -9  13   2   -0.90    1.60 
   8 -13  -2    0.50    0.90 
   8 -13  -2    2.50    1.10 
  -8 -13   2    2.90    1.60 
  -8 -13   2    0.40    1.70 
   8  13  -2    1.60    1.00 
  -8  13   2   -0.10    1.40 
  -7 -13   2   46.40    5.20 
   7 -13  -2   39.90    2.80 
   7 -13  -2   36.30    2.60 
  -7 -13   2   39.50    4.00 
   7  13  -2   40.10    2.70 
  -7  13   2   38.90    4.70 
  -6 -13   2   12.80    3.20 
   6 -13  -2   12.80    1.80 
   6 -13  -2   14.20    1.60 
  -6 -13   2   11.60    3.80 
   6  13  -2   15.40    1.70 
  -6  13   2   16.70    3.60 
   5 -13  -2    0.70    0.70 
  -5 -13   2    0.60    1.20 
  -5 -13   2    0.20    1.10 
   5 -13  -2   -0.20    0.80 
  -5  13   2    0.20    1.00 
  -5  13   2    0.10    0.80 
   5  13  -2    0.30    0.70 
  -4 -13   2   63.19    4.70 
   4 -13  -2   63.09    4.60 
   4 -13  -2   61.99    3.40 
  -4 -13   2   68.09    5.00 
   4 -13  -2   65.69    3.40 
   4  13  -2   66.59    3.50 
  -3 -13   2    0.10    0.90 
   3 -13  -2    1.70    0.70 
   3 -13  -2    0.50    0.70 
   3 -13  -2    0.60    1.00 
  -3 -13   2    1.10    1.30 
   3 -13  -2    0.60    0.90 
   3  13  -2    1.50    0.80 
  -2 -13   2  217.88   10.40 
   2 -13  -2  211.18   10.40 
   2 -13  -2  212.88    9.40 
   2 -13  -2  214.18   10.00 
   2 -13  -2  217.18    9.30 
  -2 -13   2  206.78   10.20 
   2  13  -2  226.88    9.50 
  -1 -13   2   68.79    4.80 
   1 -13  -2   68.69    4.70 
  -1 -13   2   75.19    4.70 
   1 -13  -2   67.09    3.40 
   1 -13  -2   67.89    4.50 
  -1  13   2   67.29    3.50 
   1  13  -2   72.09    3.70 
   1  13  -2   72.89    3.50 
   0 -13   2  149.79    7.30 
   0 -13   2  133.39    6.50 
   0 -13  -2  136.49    6.20 
   0 -13  -2  143.59    7.60 
   0 -13   2  145.79    7.40 
   0 -13  -2  129.79    7.20 
   0  13   2  147.39    6.30 
   1 -13   2    6.90    1.20 
   1 -13   2    7.40    2.20 
   1 -13   2    8.10    1.50 
  -1 -13  -2    7.90    2.70 
   1 -13   2    5.20    1.50 
  -1 -13  -2    5.90    1.40 
   1  13   2    6.00    1.10 
   2 -13   2   13.90    1.70 
   2 -13   2   15.80    2.90 
  -2 -13  -2   13.20    2.90 
   2 -13   2   12.50    2.40 
   2 -13   2   15.00    1.50 
  -2 -13  -2   14.50    3.10 
   2  13   2   14.30    1.40 
   3 -13   2    4.20    1.00 
   3 -13   2    4.90    1.00 
  -3 -13  -2    3.10    1.30 
  -3 -13  -2    1.70    1.20 
   3 -13   2    3.20    1.20 
   3  13   2    3.60    0.80 
   4 -13   2    0.70    0.90 
   4 -13   2    0.80    1.10 
  -4 -13  -2    1.00    1.20 
   4 -13   2    0.80    0.80 
  -4 -13  -2   -0.10    1.20 
   4  13   2    0.90    0.70 
  -4  13  -2    0.60    0.90 
   5 -13   2   98.19    5.10 
  -5 -13  -2  114.89    6.30 
   5 -13   2   99.99    5.10 
  -5 -13  -2   99.89    7.10 
   5  13   2  103.69    4.90 
  -5  13  -2   99.49    6.40 
  -6 -13  -2   27.70    3.90 
   6 -13   2   24.60    2.30 
  -6 -13  -2   24.00    4.80 
   6 -13   2   22.90    2.20 
   6  13   2   23.10    2.00 
  -6  13  -2   20.40    3.80 
  -7 -13  -2   50.49    5.90 
   7 -13   2   48.20    3.30 
   7 -13   2   47.90    3.10 
  -7 -13  -2   53.99    4.90 
   7  13   2   46.40    2.90 
  -7  13  -2   35.90    5.00 
  -8 -13  -2   13.80    4.00 
   8 -13   2    5.00    1.20 
  -8 -13  -2    3.50    2.20 
   8 -13   2    4.90    1.30 
   8  13   2    4.50    1.10 
  -9 -13  -2   36.00    6.30 
   9 -13   2   35.90    3.00 
   9 -13   2   36.80    2.90 
  -9  13  -2   23.20    5.90 
   9  13   2   27.70    4.30 
   9  13   2   36.70    2.80 
 -10 -13  -2   10.40    3.10 
  10 -13   2   11.80    2.10 
  10 -13   2   13.60    2.50 
  10  13   2   12.70    2.10 
  10  13   2    7.30    2.00 
 -11 -13  -2    5.30    2.60 
  11 -13   2   -1.10    1.00 
  11  13   2   -1.00    1.00 
  11  13   2    0.20    1.50 
  13 -14  -2    5.70    1.80 
 -12 -14   2   74.19    8.30 
  12 -14  -2   71.59    5.10 
  12 -14  -2   71.79    4.70 
  12  14  -2   65.49    4.50 
  11 -14  -2   10.80    2.10 
  11 -14  -2   18.00    2.70 
  11  14  -2   10.90    2.40 
  10 -14  -2    4.10    1.50 
  10 -14  -2    1.90    1.10 
 -10 -14   2    5.50    2.00 
  10  14  -2    4.10    1.40 
  -9 -14   2    3.90    2.20 
   9 -14  -2    1.60    1.30 
   9 -14  -2    2.40    1.00 
  -9 -14   2    3.20    1.80 
   9  14  -2    3.00    1.20 
  -9  14   2   -1.00    1.60 
  -8 -14   2   57.59    6.50 
   8 -14  -2   56.89    3.60 
  -8 -14   2   50.99    5.00 
   8 -14  -2   52.49    3.30 
   8  14  -2   59.29    3.50 
  -8  14   2   45.00    5.60 
   7 -14  -2    3.20    1.00 
   7 -14  -2    3.70    1.20 
  -7 -14   2    2.50    1.70 
  -7 -14   2    4.20    1.60 
  -7  14   2    1.70    1.50 
   7  14  -2    3.60    1.10 
  -6 -14   2   15.00    4.10 
   6 -14  -2   17.00    2.10 
   6 -14  -2   15.40    1.80 
  -6 -14   2   15.50    3.40 
   6  14  -2   14.20    1.80 
  -6  14   2   17.00    3.80 
   5 -14  -2    7.50    1.70 
  -5 -14   2    4.80    1.60 
   5 -14  -2    6.40    1.40 
  -5 -14   2    3.20    1.50 
   5  14  -2    7.00    1.50 
  -5  14   2    9.60    3.20 
   4 -14  -2   25.90    2.10 
   4 -14  -2   22.60    3.30 
  -4 -14   2   27.10    3.70 
  -4 -14   2   32.30    3.90 
   4 -14  -2   24.00    2.00 
   4  14  -2   25.40    2.10 
  -4  14   2   27.30    3.00 
  -3 -14   2   25.50    3.50 
   3 -14  -2   25.50    2.80 
   3 -14  -2   19.90    3.10 
   3 -14  -2   23.00    1.90 
  -3 -14   2   21.80    3.30 
   3 -14  -2   22.90    1.90 
   3  14  -2   21.50    1.90 
   2 -14  -2   16.30    2.70 
  -2 -14   2   14.60    2.90 
  -2 -14   2   16.80    3.20 
   2 -14  -2   10.20    1.50 
   2 -14  -2   13.40    2.90 
   2 -14  -2   12.60    1.40 
   2  14  -2   12.50    1.70 
  -1 -14   2  159.78    8.10 
   1 -14  -2  154.48    6.90 
   1 -14  -2  157.58    7.90 
  -1 -14   2  165.98    8.20 
   1 -14  -2  151.48    8.30 
  -1  14   2  152.88    7.00 
   1  14  -2  153.98    7.10 
   0 -14   2   77.09    5.10 
   0 -14  -2   77.59    5.30 
   0 -14   2   74.29    4.20 
   0 -14   2   77.69    4.90 
   0 -14  -2   79.39    3.90 
   0 -14  -2   86.59    5.10 
   0  14   2   75.89    3.90 
   0  14  -2   81.89    4.00 
  -1 -14  -2    1.90    1.10 
  -1 -14  -2    2.40    1.20 
   1 -14   2    1.50    0.90 
   1 -14   2    2.70    0.80 
   1 -14   2    4.00    1.40 
   1 -14   2    3.80    1.00 
   1  14   2    3.80    0.80 
  -2 -14  -2   32.10    3.50 
   2 -14   2   28.00    2.10 
   2 -14   2   24.80    2.20 
   2 -14   2   28.90    3.00 
   2 -14   2   30.80    3.30 
  -2 -14  -2   32.80    3.90 
   2  14   2   27.50    1.90 
   3 -14   2   33.70    2.40 
  -3 -14  -2   36.20    3.90 
   3 -14   2   33.00    2.60 
   3 -14   2   40.00    3.50 
  -3 -14  -2   36.40    4.50 
   3  14   2   35.60    2.30 
  -4 -14  -2   34.80    3.90 
   4 -14   2   35.30    4.10 
   4 -14   2   27.60    2.40 
   4 -14   2   31.70    2.40 
  -4 -14  -2   28.40    4.60 
  -4  14  -2   31.60    3.70 
   4  14   2   32.40    2.20 
  -5 -14  -2   18.40    3.40 
   5 -14   2   11.40    1.90 
   5 -14   2   11.40    1.80 
  -5 -14  -2    8.40    2.10 
  -5  14  -2   10.50    3.30 
   5  14   2   10.70    1.50 
   6 -14   2   21.80    2.30 
  -6 -14  -2   31.00    3.90 
  -6 -14  -2   19.60    4.80 
   6 -14   2   20.40    2.30 
  -6  14  -2   16.70    3.90 
   6  14   2   22.90    2.00 
  -7 -14  -2   40.80    6.10 
   7 -14   2   42.20    3.10 
  -7 -14  -2   56.49    5.00 
   7 -14   2   45.20    3.30 
   7  14   2   43.10    2.90 
  -7  14  -2   32.80    5.10 
   8 -14   2   62.19    3.90 
   8 -14   2   58.39    3.90 
  -8 -14  -2   64.49    6.90 
   8  14   2   60.89    3.70 
   9 -14   2    4.00    1.40 
   9 -14   2    1.70    1.20 
  -9 -14  -2    6.20    2.70 
   9  14   2    0.90    1.50 
   9  14   2    2.80    1.10 
  10 -14   2   56.29    3.90 
 -10 -14  -2   77.09    7.60 
  10 -14   2   58.69    4.10 
  10  14   2   59.49    3.80 
  10  14   2   43.90    5.30 
  11 -14   2    5.80    1.60 
  11  14   2    4.50    1.40 
  11  14   2    2.60    1.80 
 -11  14  -2    3.70    1.70 
  12 -14   2    5.80    1.60 
 -12 -14  -2   18.10    7.10 
 -12  14  -2    5.00    1.90 
  12  14   2    5.30    1.50 
  12  14   2    3.30    1.90 
  12 -15  -2    4.60    1.60 
  12  15  -2   -0.10    1.30 
 -11 -15   2   39.90    5.30 
  11 -15  -2   21.50    3.10 
  11  15  -2   19.40    2.80 
 -10 -15   2   17.10    6.40 
  10 -15  -2    3.50    1.50 
  10  15  -2    2.20    1.30 
 -10  15   2   -2.40    2.00 
  -9 -15   2    0.40    1.80 
  -9 -15   2    1.10    2.20 
   9 -15  -2    0.00    1.30 
   9  15  -2    0.50    1.10 
  -9  15   2   -1.60    1.70 
  -8 -15   2    5.20    2.00 
   8 -15  -2    2.70    1.30 
   8 -15  -2    1.90    1.10 
   8  15  -2    3.20    1.20 
  -8  15   2   -0.70    1.60 
   7 -15  -2   12.90    2.30 
   7 -15  -2    9.70    1.80 
  -7 -15   2    7.00    2.20 
  -7 -15   2   19.10    4.20 
   7  15  -2   10.60    1.90 
  -7  15   2   10.90    4.20 
  -6 -15   2   14.50    3.70 
   6 -15  -2   13.00    2.00 
   6 -15  -2    8.60    1.70 
  -6 -15   2    6.10    2.00 
  -6  15   2   10.30    3.70 
   6  15  -2    8.70    1.70 
   5 -15  -2   41.00    2.80 
  -5 -15   2   39.00    4.90 
  -5 -15   2   41.80    4.30 
   5 -15  -2   35.80    2.60 
   5  15  -2   40.30    2.70 
  -5  15   2   41.00    4.50 
   4 -15  -2   21.60    2.00 
  -4 -15   2   21.70    3.90 
   4 -15  -2   18.00    1.90 
  -4 -15   2   25.80    3.70 
   4 -15  -2   16.80    3.40 
  -4  15   2   20.10    2.90 
   4  15  -2   21.60    2.00 
   3 -15  -2   17.80    1.80 
   3 -15  -2   27.90    3.00 
  -3 -15   2   27.00    3.90 
  -3 -15   2   23.40    3.50 
   3 -15  -2   20.00    1.90 
   3 -15  -2   18.80    3.30 
   3  15  -2   20.40    2.00 
   2 -15  -2   23.10    1.80 
  -2 -15   2   24.70    3.40 
   2 -15  -2   18.50    3.30 
   2 -15  -2   25.10    3.20 
  -2 -15   2   27.20    3.60 
   2 -15  -2   19.40    1.90 
   2  15  -2   21.60    2.00 
  -1 -15   2   54.89    4.60 
   1 -15  -2   53.99    2.90 
   1 -15  -2   53.09    4.70 
  -1 -15   2   57.29    4.30 
   1 -15  -2   57.79    4.30 
  -1  15   2   51.79    3.00 
   1  15  -2   53.29    3.30 
   0 -15  -2   10.60    3.30 
   0 -15  -2   10.70    3.20 
   0 -15   2   10.50    3.30 
   0 -15   2    9.20    2.50 
   0  15   2    9.10    1.40 
   0  15  -2   10.40    1.90 
   0  15  -2   10.80    1.70 
   1 -15   2   55.09    4.30 
   1 -15   2   59.89    3.60 
   1 -15   2   64.89    4.70 
  -1 -15  -2   61.89    5.10 
  -1 -15  -2   72.09    4.90 
  -1  15  -2   66.49    3.50 
   1  15   2   58.99    3.30 
   2 -15   2   34.00    2.60 
   2 -15   2   33.10    3.40 
  -2 -15  -2   37.40    3.90 
   2 -15   2   32.90    2.40 
  -2 -15  -2   33.80    4.40 
   2 -15   2   41.30    3.80 
   2  15   2   35.00    2.30 
  -3 -15  -2    4.20    1.60 
   3 -15   2   10.40    2.70 
  -3 -15  -2    6.00    1.70 
   3 -15   2    6.30    1.50 
   3 -15   2    6.20    1.30 
   3  15   2    6.30    1.30 
  -4 -15  -2   14.20    4.50 
  -4 -15  -2   17.60    3.80 
   4 -15   2   13.60    1.90 
   4 -15   2   14.90    1.90 
   4  15   2   14.30    1.60 
  -4  15  -2   16.10    3.30 
  -5 -15  -2   29.80    4.00 
   5 -15   2   25.40    2.40 
  -5 -15  -2   23.10    5.00 
   5 -15   2   26.80    2.40 
  -5  15  -2   22.30    4.90 
   5  15   2   26.70    2.10 
  -6 -15  -2   30.70    4.30 
  -6 -15  -2   19.70    5.50 
   6 -15   2   15.40    2.30 
   6 -15   2   21.70    2.40 
   6  15   2   19.80    2.00 
   7 -15   2   16.30    2.30 
  -7 -15  -2   22.00    5.90 
  -7 -15  -2   35.10    4.50 
   7 -15   2   22.20    2.60 
   7  15   2   21.80    2.20 
  -8 -15  -2    2.60    2.30 
   8 -15   2    0.50    1.10 
   8 -15   2    1.40    1.20 
   8  15   2    0.30    1.00 
   8  15   2   -1.80    1.50 
   9 -15   2   -0.30    1.20 
   9 -15   2    3.50    1.40 
   9  15   2   -1.60    1.50 
   9  15   2    2.00    1.20 
 -10 -15  -2    0.20    2.70 
  10 -15   2   -1.00    1.20 
  10  15   2    1.20    1.20 
 -10  15  -2    1.70    1.60 
  10  15   2    1.30    1.70 
  11 -15   2   20.20    2.70 
  11  15   2   18.70    4.40 
 -11  15  -2   18.10    3.10 
  11  15   2   19.00    2.70 
 -11 -16   2   26.90    5.40 
 -10 -16   2   27.70    5.20 
  -9 -16   2    4.20    2.30 
   9 -16  -2    1.50    1.40 
   9  16  -2    1.50    1.30 
  -8 -16   2    1.60    2.30 
  -8 -16   2    3.80    2.20 
   8 -16  -2    3.20    1.40 
   8  16  -2    2.10    1.20 
  -8  16   2   -0.50    1.70 
  -7 -16   2   21.60    4.70 
   7 -16  -2   20.30    2.70 
  -7  16   2   17.70    4.60 
   7  16  -2   21.80    2.40 
  -6 -16   2   15.30    4.00 
   6 -16  -2   11.30    2.20 
  -6 -16   2   11.90    4.70 
   6  16  -2    9.00    1.80 
   5 -16  -2   11.00    2.00 
  -5 -16   2    4.60    1.80 
  -5 -16   2    5.60    1.90 
  -5  16   2    4.90    1.60 
   5  16  -2    7.40    1.70 
  -4 -16   2   32.90    4.40 
   4 -16  -2   20.70    3.70 
   4 -16  -2   29.90    2.30 
  -4 -16   2   27.10    4.20 
  -4  16   2   27.90    3.50 
   4  16  -2   26.60    2.30 
   3 -16  -2   30.00    2.20 
  -3 -16   2   30.30    4.00 
   3 -16  -2   29.00    3.80 
  -3 -16   2   32.70    4.30 
  -3  16   2   25.50    3.30 
   3  16  -2   26.30    2.30 
  -2 -16   2    0.30    1.10 
   2 -16  -2    0.80    0.80 
   2 -16  -2   -0.30    1.00 
  -2 -16   2    2.40    1.60 
  -2  16   2    1.50    0.80 
   2  16  -2    0.80    0.80 
   1 -16  -2    3.60    1.50 
   1 -16  -2    0.30    1.10 
  -1 -16   2    3.30    1.60 
  -1  16   2    1.80    0.80 
   1  16  -2    2.80    1.00 
   0 -16  -2   15.10    3.50 
   0 -16   2    7.60    2.80 
   0 -16   2   13.50    3.50 
   0 -16  -2    9.20    3.60 
   0  16   2    9.30    1.50 
   0  16  -2   11.30    1.80 
   1 -16   2    1.90    1.00 
  -1 -16  -2    1.90    1.30 
   1 -16   2    2.70    1.50 
   1 -16   2    1.10    1.00 
  -1 -16  -2    3.70    1.60 
   1  16   2    1.60    0.80 
  -1  16  -2    1.50    1.00 
   2 -16   2   20.20    3.70 
  -2 -16  -2   21.10    4.30 
   2 -16   2   25.30    3.50 
   2 -16   2   19.80    2.20 
  -2 -16  -2   29.50    4.10 
   2  16   2   18.20    1.80 
  -2  16  -2   21.50    2.20 
  -3 -16  -2   22.00    4.00 
  -3 -16  -2   15.00    4.30 
   3 -16   2   20.60    3.10 
   3 -16   2   13.90    2.10 
   3  16   2   16.20    1.70 
  -4 -16  -2    2.90    1.90 
   4 -16   2    3.80    1.10 
  -4 -16  -2   15.10    3.90 
   4 -16   2    3.30    1.20 
   4  16   2    4.30    1.00 
  -5 -16  -2    0.40    1.90 
  -5 -16  -2    2.50    1.60 
   5 -16   2    0.90    1.00 
   5 -16   2    0.80    1.00 
   5  16   2    0.50    0.80 
  -6 -16  -2   49.00    6.70 
   6 -16   2   45.90    3.50 
  -6 -16  -2   68.19    5.70 
   6 -16   2   52.89    3.60 
   6  16   2   50.89    3.30 
   7 -16   2    3.10    1.40 
   7 -16   2    5.00    1.40 
  -7 -16  -2    6.50    2.60 
   7  16   2    3.50    1.20 
  -8 -16  -2    3.10    2.70 
   8 -16   2    2.90    1.40 
   8  16   2    3.00    1.30 
   8  16   2    1.00    1.70 
  -9 -16  -2   17.20    6.50 
   9 -16   2   11.60    2.40 
  -9  16  -2   12.10    2.30 
   9  16   2   15.60    2.30 
   9  16   2    6.80    2.10 
 -10 -17   2   44.90    5.70 
  10 -17  -2   31.70    3.50 
  10  17  -2   25.90    3.20 
  -9 -17   2   54.69    6.00 
   9 -17  -2   39.90    3.80 
   9  17  -2   39.60    3.50 
  -7 -17   2   28.90    6.30 
  -7 -17   2   39.60    5.40 
   7 -17  -2   32.80    3.10 
  -7  17   2   27.50    5.20 
   7  17  -2   37.50    2.90 
  -6 -17   2    3.90    2.10 
   6 -17  -2    4.70    1.40 
  -6  17   2    1.50    1.60 
   6  17  -2    3.50    1.20 
  -5 -17   2   25.40    4.70 
  -5 -17   2   20.10    4.90 
   5 -17  -2   21.90    2.40 
   5  17  -2   20.30    2.30 
  -5  17   2   20.00    4.10 
   4 -17  -2    7.60    1.80 
  -4 -17   2    3.90    1.80 
   3 -17  -2   -0.50    1.20 
  -3 -17   2   -0.20    1.30 
  -3 -17   2    2.90    1.70 
   3 -17  -2    2.20    1.00 
  -3  17   2   -0.50    1.20 
   3  17  -2    0.10    0.90 
   2 -17  -2   16.50    3.80 
  -2 -17   2   30.50    4.40 
  -2 -17   2   30.20    3.80 
   2  17  -2   24.70    2.20 
  -2  17   2   21.10    3.50 
   1 -17  -2   16.70    4.10 
   1 -17  -2   32.70    4.00 
  -1 -17   2   24.90    4.20 
  -1 -17   2   25.40    4.50 
   1  17  -2   19.70    2.20 
   0 -17  -2   13.10    4.10 
   0 -17  -2   20.50    3.90 
   0 -17   2   23.40    4.00 
   0  17  -2   13.70    2.00 
  -1 -17  -2   29.00    4.90 
   1 -17   2   38.50    4.40 
  -1  17  -2   31.90    2.60 
   2 -17   2    0.20    1.00 
  -2 -17  -2    1.90    1.60 
   2 -17   2    2.20    1.40 
  -2 -17  -2    0.80    1.50 
  -2  17  -2   -0.20    1.00 
  -3 -17  -2    1.60    1.70 
  -3 -17  -2    4.70    1.90 
   3 -17   2    1.00    1.10 
  -3  17  -2   -0.70    1.10 
  -4 -17  -2   34.60    4.50 
   4 -17   2   25.30    2.60 
  -4 -17  -2   31.90    5.40 
  -4  17  -2   22.00    2.70 
   5 -17   2    0.30    1.10 
  -5 -17  -2    1.60    2.20 
  -5 -17  -2   14.20    4.20 
  -5  17  -2   -2.70    1.20 
   6 -17   2    1.10    1.20 
  -6 -17  -2   15.00    5.60 
  -6  17  -2   -0.60    1.40 
   7 -17   2    5.10    1.50 
   7  17   2    3.20    1.90 
  -7  17  -2    6.00    1.90 
   8 -17   2   47.80    3.60 
  -8  17  -2   41.80    3.90 
   8  17   2   39.60    5.30 
  -9 -18   2   29.30    5.60 
   9 -18  -2   16.60    3.10 
   9  18  -2   22.50    2.90 
   8 -18  -2    3.20    1.60 
   8  18  -2    1.20    1.40 
  -7 -18   2    5.00    2.40 
   7 -18  -2    3.20    1.50 
   7  18  -2    1.50    1.20 
  -7  18   2   -0.50    1.90 
   6 -18  -2   11.20    2.40 
  -6 -18   2    6.90    2.50 
  -6 -18   2   17.30    4.90 
   6  18  -2    7.60    1.50 
  -6  18   2    3.40    1.90 
   5 -18  -2    3.60    1.20 
  -5 -18   2    4.70    2.10 
   5  18  -2    0.90    1.10 
  -4 -18   2    3.90    2.10 
   4 -18  -2    2.00    1.10 
   4  18  -2    1.10    1.10 
   3 -18  -2    6.90    1.80 
  -3 -18   2   18.80    4.50 
  -3  18   2   11.50    3.20 
   3  18  -2   11.60    1.90 
  -2 -18   2    4.80    2.00 
   2 -18  -2   -0.30    1.30 
   2  18  -2    1.20    1.00 
  -2  18   2   -0.40    1.30 
   1 -18  -2    4.60    1.70 
  -1  18   2    4.60    1.70 
   1  18  -2    8.60    1.80 
   0 -18  -2    2.60    1.50 
   0 -18   2    2.40    1.70 
   0  18  -2   -0.10    1.00 
   1 -18   2    4.10    1.70 
  -1  18  -2    0.70    1.10 
  -2 -18  -2    1.80    1.70 
   2 -18   2   -0.20    1.10 
   3 -18   2   -1.60    1.00 
  -3 -18  -2    0.10    1.90 
  -3  18  -2   -0.30    1.20 
  -4 -18  -2   43.00    5.70 
  -4 -18  -2   33.50    5.20 
   5 -18   2   36.00    3.30 
  -5 -18  -2   53.19    6.90 
  -5  18  -2   42.90    3.60 
   5  18   2   37.50    4.80 
   7 -18   2   72.99    4.50 
   7  18   2   64.89    6.30 
  -7  18  -2   74.19    5.00 
  -7 -19   2   47.00    6.00 
   7 -19  -2   31.40    3.30 
   7  19  -2   30.40    3.10 
   6 -19  -2    4.20    1.40 
  -6 -19   2   17.60    5.10 
   6  19  -2    2.40    1.30 
   5 -19  -2    0.70    1.20 
  -5 -19   2    2.20    2.20 
   5  19  -2   -1.40    1.00 
  -5  19   2    0.60    1.70 
  -4 -19   2   27.20    4.80 
   4  19  -2   16.20    2.40 
  -4  19   2   22.20    4.50 
   3 -19  -2    4.40    1.80 
  -3 -19   2   19.20    4.70 
   3  19  -2    8.40    2.00 
  -2 -19   2   27.50    4.80 
   2  19  -2   16.00    2.20 
  -2  19   2   15.00    3.60 
  -1 -19   2    2.70    1.90 
   1 -19  -2    0.20    1.60 
  -1  19   2   -0.10    1.50 
   1  19  -2    2.90    1.20 
   0 -19  -2    0.40    1.70 
   0 -19   2    4.60    2.00 
   0  19   2    1.00    1.60 
   0  19  -2    3.70    1.30 
  -1 -19  -2    0.30    1.70 
  -1  19  -2   -0.30    1.10 
   1  19   2   -3.20    1.40 
   2 -19   2   30.80    6.60 
   3 -19   2    1.30    1.30 
   3  19   2   -1.60    1.60 
   4 -19   2    6.20    1.60 
  -4 -19  -2    4.00    2.50 
   4  19   2    2.90    1.90 
  -4  19  -2    6.00    1.70 
  -6 -19  -2    1.30    2.50 
  -6  19  -2    0.70    1.50 
   6  19   2   -0.50    1.80 
   5  20  -2    1.00    1.30 
   4  20  -2   48.20    3.50 
   3  20  -2   50.09    3.50 
   0 -20   2   30.00    5.00 
   1 -20   2    3.40    1.90 
  -1 -20  -2   -0.10    2.00 
   1  20   2    0.20    1.70 
  -2 -20  -2   22.30    5.70 
   3  20   2   -0.90    1.70 
  -1 -21   2   30.70    5.20 
   0 -21   2   35.60    5.20 
   1  21   2    0.70    1.80 
  17   0  -3   78.89    4.90 
  13   0  -3   19.00    2.00 
  13   0  -3   22.40    1.80 
 -12   0   3   10.10    3.80 
  11   0  -3   24.50    1.60 
 -11   0   3   23.60    4.20 
  11   0  -3   23.90    2.00 
 -10   0   3    0.50    1.20 
  10   0  -3    0.00    0.60 
  10   0  -3   -0.40    0.50 
   9   0  -3   37.60    2.10 
  -9   0   3   31.60    2.00 
   9   0  -3   35.50    1.90 
  -9   0   3   34.90    4.10 
  -8   0   3   -0.50    0.40 
   8   0  -3   -0.20    0.40 
  -8   0   3   -0.40    1.00 
   8   0  -3   -0.40    0.40 
   7   0  -3  300.27   12.50 
  -7   0   3  298.67   13.70 
   7   0  -3  299.87   12.70 
  -7   0   3  319.07   12.70 
  -6   0   3    0.00    0.40 
   6   0  -3   -0.70    0.30 
   6   0  -3    0.10    0.30 
  -6   0   3    0.50    0.80 
  -5   0   3  368.66   15.20 
   5   0  -3  344.87   14.30 
  -5   0   3  358.36   14.50 
   5   0  -3  331.27   14.40 
  -4   0   3    0.70    0.70 
   4   0  -3    0.80    0.30 
   4   0  -3    0.10    0.30 
  -4   0   3    0.00    0.40 
  -3   0   3    6.50    1.70 
  -3   0   3    3.30    1.00 
  -2   0   3    1.20    0.60 
  -2   0   3   -0.30    0.30 
   2   0  -3   -0.70    0.20 
   2   0  -3   -0.50    0.20 
   1   0  -3   20.40    1.10 
  -1   0   3   24.10    1.30 
  -1   0   3   22.70    1.10 
   1   0  -3   21.60    1.20 
   0   0   3   -0.10    0.20 
   0   0  -3    0.00    0.10 
   0   0   3   -0.10    0.10 
   1   0   3  320.07   13.00 
  -1   0  -3  322.67   13.00 
  -1   0  -3  303.37   13.10 
   1   0   3  333.77   13.20 
  -2   0  -3   -0.60    0.30 
   2   0   3    0.20    0.30 
   2   0   3    0.00    0.20 
  -2   0  -3   -0.20    0.30 
   3   0   3   24.20    1.40 
  -3   0  -3   23.70    1.20 
  -3   0  -3   22.10    1.70 
   3   0   3   23.10    1.30 
  -4   0  -3   -0.70    0.40 
  -4   0  -3    0.20    0.30 
   4   0   3    0.00    0.30 
   4   0   3   -0.10    0.30 
  -5   0  -3  138.49    6.70 
   5   0   3  148.29    6.20 
  -5   0  -3  136.59    6.00 
   5   0   3  137.39    6.10 
   6   0   3   -0.10    0.30 
  -6   0  -3   -0.90    0.50 
   6   0   3    0.20    0.40 
  -6   0  -3    0.00    0.30 
  -7   0  -3    9.10    1.00 
  -7   0  -3    5.50    2.10 
   7   0   3    8.80    1.10 
   7   0   3   10.10    1.20 
   8   0   3    0.00    0.40 
  -8   0  -3   -0.90    0.70 
  -8   0  -3   -0.10    0.50 
   8   0   3    0.10    0.50 
   9   0   3  248.88   10.70 
  -9   0  -3  253.07   10.60 
  -9   0  -3  241.48   11.80 
 -10   0  -3    0.30    1.10 
  10   0   3   -0.60    0.70 
 -10   0  -3    0.40    0.60 
 -11   0  -3   23.00    3.90 
 -11   0  -3   19.00    1.70 
  11   0   3   19.10    2.00 
 -12   0  -3    2.20    1.60 
 -12   0  -3   -0.50    0.80 
  12   0   3    0.00    0.80 
  13   0   3   60.19    3.90 
 -13   0  -3   70.29    6.30 
 -14   0  -3   19.20    5.40 
 -15   0  -3  111.79    8.90 
  15   0   3   98.69    5.70 
  16   0   3    0.20    1.30 
  16  -1  -3   62.49    4.00 
  16   1  -3   57.79    4.00 
  15  -1  -3   65.29    4.00 
  15   1  -3   62.79    4.00 
  14  -1  -3   47.70    3.20 
  14   1  -3   44.70    3.20 
  13  -1  -3    4.50    1.10 
  13  -1  -3    5.40    1.20 
  13   1  -3    4.00    1.10 
  12  -1  -3    0.40    0.80 
 -12  -1   3    2.00    1.30 
  12  -1  -3   -0.10    0.60 
  12   1  -3    0.70    0.60 
  12   1  -3    0.40    0.80 
 -12   1   3    1.10    1.40 
  11  -1  -3   23.50    1.70 
  11  -1  -3   21.30    1.90 
 -11  -1   3   20.70    3.90 
  11   1  -3   21.70    1.90 
 -11   1   3   21.70    4.30 
  11   1  -3   23.60    1.50 
  10  -1  -3   46.20    2.70 
 -10  -1   3   49.60    4.50 
  10  -1  -3   48.20    2.50 
  10   1  -3   45.00    2.70 
 -10   1   3   57.39    5.10 
  10   1  -3   44.70    2.40 
  -9  -1   3    4.00    1.30 
   9  -1  -3    7.90    1.10 
   9  -1  -3    6.40    1.00 
  -9  -1   3    7.40    1.30 
  -9   1   3    9.30    3.60 
   9   1  -3    8.00    1.10 
   9   1  -3    6.70    0.80 
  -8  -1   3   58.49    3.00 
   8  -1  -3   54.19    2.70 
   8  -1  -3   54.89    2.80 
  -8  -1   3   54.39    4.20 
   8   1  -3   56.69    2.80 
  -8   1   3   58.49    4.60 
   8   1  -3   53.39    2.60 
   7  -1  -3   -1.00    0.40 
   7  -1  -3   -0.10    0.40 
  -7  -1   3   -0.90    0.50 
  -7  -1   3   -0.20    0.80 
  -7   1   3    0.30    0.90 
   7   1  -3    0.20    0.40 
  -7   1   3   -0.30    0.40 
  -6  -1   3   -0.30    0.50 
  -6  -1   3   -0.30    0.80 
   6  -1  -3    0.20    0.40 
   6  -1  -3    0.10    0.40 
   6   1  -3    0.30    0.40 
  -6   1   3    0.00    0.30 
  -6   1   3    1.00    0.90 
   6   1  -3   -0.20    0.30 
  -5  -1   3  315.17   12.90 
  -5  -1   3  304.07   12.30 
   5  -1  -3  289.87   12.20 
   5  -1  -3  289.27   12.10 
  -5   1   3  294.97   13.00 
   5   1  -3  285.17   12.20 
   5   1  -3  288.77   12.00 
  -5   1   3  293.37   12.10 
  -4  -1   3  181.88    7.30 
   4  -1  -3  151.88    6.60 
   4  -1  -3  153.08    6.60 
  -4  -1   3  151.18    6.80 
  -4   1   3  152.08    6.60 
   4   1  -3  156.08    6.50 
  -4   1   3  166.78    7.30 
   4   1  -3  148.49    6.60 
  -3  -1   3  515.65   19.40 
   3  -1  -3  451.15   18.90 
  -3  -1   3  436.86   19.10 
   3  -1  -3  469.55   18.90 
  -3   1   3  498.85   19.40 
   3   1  -3  456.25   18.90 
   3   1  -3  461.95   18.90 
  -3   1   3  449.16   19.00 
   2  -1  -3  843.52   33.80 
   2  -1  -3  860.11   33.90 
  -2  -1   3  900.71   34.00 
  -2  -1   3  724.73   33.90 
   2   1  -3  863.41   33.80 
  -2   1   3  819.22   34.10 
   2   1  -3  821.92   33.80 
  -2   1   3  872.61   33.90 
   1  -1  -3    9.00    0.80 
  -1  -1   3    9.90    0.60 
   1  -1  -3    9.30    0.60 
  -1  -1   3   11.50    0.70 
  -1  -1   3   10.20    0.80 
   1   1  -3    8.40    0.60 
  -1   1   3   10.00    0.80 
   0  -1  -3  519.95   21.10 
   0  -1  -3  519.05   21.30 
   0  -1   3  530.55   21.10 
   0  -1   3  481.65   21.20 
   0   1   3  578.64   21.30 
   0   1  -3  504.85   21.10 
   0   1   3  518.15   21.00 
   1  -1   3  656.93   26.30 
  -1  -1  -3  615.74   26.50 
  -1  -1  -3  647.74   26.30 
   1  -1   3  676.53   26.40 
  -1   1  -3  664.93   26.30 
   1   1   3  656.23   26.30 
   1   1   3  666.43   26.50 
  -1   1  -3  621.14   26.40 
  -2  -1  -3   38.00    1.70 
  -2  -1  -3   36.50    2.10 
   2  -1   3   37.20    1.70 
   2  -1   3   40.20    1.90 
  -2   1  -3   30.60    2.10 
   2   1   3   39.50    2.00 
   2   1   3   39.10    1.70 
  -2   1  -3   33.90    1.70 
   3  -1   3    1.30    0.40 
   3  -1   3    1.00    0.30 
  -3  -1  -3    0.10    0.40 
  -3  -1  -3    0.90    0.30 
   3   1   3    0.80    0.40 
  -3   1  -3    1.30    0.40 
   3   1   3    1.10    0.30 
   4  -1   3   24.50    1.40 
  -4  -1  -3   23.60    1.30 
  -4  -1  -3   21.20    1.90 
   4  -1   3   23.50    1.40 
   4   1   3   23.90    1.30 
  -4   1  -3   21.60    1.30 
   4   1   3   24.50    1.60 
  -4   1  -3   22.20    1.90 
   5  -1   3   12.50    1.00 
  -5  -1  -3   10.10    1.60 
  -5  -1  -3   11.50    0.90 
   5  -1   3   10.90    1.00 
   5   1   3   11.40    1.00 
  -5   1  -3    9.90    1.80 
  -5   1  -3   11.70    1.00 
   5   1   3   10.90    1.20 
  -6  -1  -3   16.10    2.10 
   6  -1   3   18.60    1.30 
  -6  -1  -3   18.80    1.20 
   6  -1   3   19.10    1.30 
   6   1   3   19.70    1.50 
   6   1   3   17.80    1.30 
  -6   1  -3   18.80    1.30 
  -6   1  -3   17.70    2.30 
  -7  -1  -3  188.68    9.30 
   7  -1   3  195.78    8.50 
  -7  -1  -3  194.28    8.30 
   7  -1   3  201.08    8.30 
  -7   1  -3  185.38    9.30 
   7   1   3  195.38    8.50 
   7   1   3  201.58    8.60 
  -7   1  -3  204.38    8.40 
  -8  -1  -3   93.19    4.30 
  -8  -1  -3   87.39    5.40 
   8  -1   3   95.19    4.50 
  -8   1  -3   90.99    5.50 
   8   1   3   94.29    4.50 
  -8   1  -3   95.69    4.40 
   8   1   3   96.19    4.60 
  -9  -1  -3    2.60    1.10 
   9  -1   3    3.60    0.90 
  -9   1  -3    6.30    1.20 
   9   1   3    5.00    1.20 
  -9   1  -3    2.30    1.20 
  10  -1   3   10.10    1.50 
 -10  -1  -3   10.00    1.20 
 -10  -1  -3    6.30    1.60 
 -10   1  -3   12.00    3.60 
 -10   1  -3    8.70    1.40 
  10   1   3    9.10    1.50 
 -11  -1  -3   32.20    4.40 
 -11  -1  -3   30.10    2.10 
  11  -1   3   30.70    2.30 
 -11   1  -3   37.70    4.40 
  11   1   3   29.90    2.40 
 -11   1  -3   29.20    2.20 
 -12  -1  -3   18.20    4.60 
  12  -1   3   15.20    1.90 
 -12   1  -3   14.80    1.70 
  12   1   3   14.10    1.80 
 -13  -1  -3   23.60    5.10 
  13  -1   3   15.10    2.10 
  13   1   3   16.30    2.10 
  14  -1   3   12.60    2.20 
 -14  -1  -3   22.70    5.60 
  14   1   3   14.10    2.30 
  15  -1   3   13.10    2.40 
  15   1   3   19.10    2.50 
  16  -2  -3   76.59    4.70 
  16   2  -3   79.39    4.80 
 -13   2   3   21.00    4.90 
  12  -2  -3   19.90    1.70 
  12  -2  -3   21.70    2.00 
  12   2  -3   19.90    2.00 
 -12   2   3   27.00    4.50 
  11  -2  -3    0.80    0.70 
  11  -2  -3    0.80    0.70 
 -11  -2   3    0.70    1.20 
  11   2  -3    0.50    0.70 
 -11   2   3    0.20    1.40 
  11   2  -3    0.30    0.50 
 -10  -2   3    0.50    0.70 
  10  -2  -3    2.50    0.70 
 -10  -2   3    0.30    1.10 
  10  -2  -3    2.50    0.70 
  10   2  -3    1.80    0.70 
  10   2  -3    1.90    0.50 
 -10   2   3    2.30    1.50 
  -9  -2   3    5.90    1.50 
  -9  -2   3    2.60    1.20 
   9  -2  -3    5.40    1.00 
   9  -2  -3    5.20    1.00 
  -9   2   3    9.40    3.60 
   9   2  -3    5.40    0.80 
   9   2  -3    5.20    1.00 
  -8  -2   3   46.50    2.80 
   8  -2  -3   47.40    2.50 
  -8  -2   3   41.70    3.80 
   8  -2  -3   46.40    2.40 
   8   2  -3   46.60    2.20 
   8   2  -3   47.60    2.50 
  -8   2   3   46.10    4.40 
  -7  -2   3  218.28   10.50 
   7  -2  -3  231.18    9.70 
   7  -2  -3  233.58    9.60 
  -7  -2   3  232.68    9.90 
  -7   2   3  222.78   10.90 
   7   2  -3  232.08    9.40 
   7   2  -3  233.98    9.70 
   6  -2  -3   89.99    4.00 
   6  -2  -3   89.39    4.00 
  -6  -2   3   91.69    4.30 
  -6  -2   3   82.79    4.90 
   6   2  -3   90.09    4.00 
  -6   2   3   89.89    5.30 
   6   2  -3   91.89    3.80 
   5  -2  -3  163.48    6.90 
  -5  -2   3  168.38    7.60 
  -5  -2   3  161.58    7.20 
   5  -2  -3  159.78    6.90 
  -5   2   3  170.18    7.80 
   5   2  -3  156.78    6.90 
  -5   2   3  162.58    6.80 
   5   2  -3  161.58    6.70 
   4  -2  -3   76.89    3.50 
  -4  -2   3   76.19    3.80 
  -4  -2   3   82.59    4.10 
   4  -2  -3   80.09    3.40 
  -4   2   3   84.29    4.20 
   4   2  -3   81.19    3.40 
  -4   2   3   78.09    3.40 
   4   2  -3   77.39    3.50 
  -3  -2   3  746.33   27.60 
   3  -2  -3  675.73   27.20 
   3  -2  -3  662.93   27.20 
  -3  -2   3  597.04   27.40 
  -3   2   3  690.23   27.30 
   3   2  -3  640.54   27.20 
  -3   2   3  719.43   27.70 
   3   2  -3  643.24   27.10 
   2  -2  -3   13.70    0.90 
   2  -2  -3   14.70    1.30 
  -2  -2   3   16.90    1.40 
   2  -2  -3   13.40    0.70 
   2   2  -3   13.10    0.80 
   2   2  -3   14.80    0.80 
  -2   2   3   13.70    1.10 
   1  -2  -3 1123.39   45.50 
  -1  -2   3 1113.09   45.30 
  -1  -2   3 1079.99   45.60 
   1  -2  -3 1124.69   45.50 
  -1   2   3 1178.98   45.50 
   1   2  -3 1123.89   45.30 
   0  -2   3   60.19    3.00 
   0  -2  -3   61.59    3.00 
   0  -2   3   62.69    2.80 
   0   2   3   65.99    2.60 
   0   2   3   67.89    3.00 
   0   2  -3   61.19    2.80 
   1  -2   3 1207.78   49.40 
  -1  -2  -3 1368.76   49.30 
   1  -2   3 1223.98   49.60 
  -1  -2  -3 1119.39   49.60 
   1   2   3 1251.97   49.50 
   1   2   3 1215.48   49.60 
  -1   2  -3 1181.18   49.30 
   2  -2   3  856.61   35.60 
   2  -2   3  837.02   35.70 
  -2  -2  -3  889.81   35.50 
  -2  -2  -3  828.52   36.00 
  -2   2  -3  943.41   35.80 
   2   2   3  915.11   35.60 
   2   2   3  898.11   35.90 
   3  -2   3  157.58    6.80 
   3  -2   3  158.48    6.80 
  -3  -2  -3  165.08    6.70 
  -3  -2  -3  147.09    7.20 
  -3   2  -3  176.38    7.20 
   3   2   3  164.38    7.10 
  -3   2  -3  153.68    6.80 
   3   2   3  162.68    6.80 
  -4  -2  -3  187.78    7.70 
   4  -2   3  183.98    7.80 
  -4  -2  -3  183.68    8.40 
   4  -2   3  183.38    7.80 
   4   2   3  182.38    7.80 
  -4   2  -3  183.78    8.30 
   4   2   3  196.78    8.10 
  -4   2  -3  182.58    7.80 
  -5  -2  -3  214.88    9.80 
   5  -2   3  210.98    9.10 
  -5  -2  -3  218.18    9.00 
   5  -2   3  216.48    9.00 
  -5   2  -3  210.38    9.10 
   5   2   3  224.38    9.40 
   5   2   3  211.58    9.10 
  -5   2  -3  219.38    9.70 
   6  -2   3  191.98    8.30 
  -6  -2  -3  190.88    8.10 
   6  -2   3  185.98    8.10 
  -6  -2  -3  192.98    9.10 
   6   2   3  194.08    8.30 
   6   2   3  198.48    8.50 
  -6   2  -3  195.38    9.00 
  -6   2  -3  195.58    8.30 
  -7  -2  -3   -0.50    0.60 
   7  -2   3    0.00    0.30 
   7  -2   3   -0.30    0.50 
  -7  -2  -3    0.10    0.40 
  -7   2  -3   -0.30    0.80 
   7   2   3    0.30    0.50 
   7   2   3   -0.40    0.50 
  -7   2  -3   -0.10    0.40 
   8  -2   3  238.78   10.10 
  -8  -2  -3  232.48    9.90 
  -8  -2  -3  227.28   11.10 
   8   2   3  240.08   10.30 
   8   2   3  237.58   10.10 
  -8   2  -3  227.38   11.10 
  -8   2  -3  238.78   10.10 
   9  -2   3   12.10    1.50 
  -9  -2  -3   11.80    3.10 
  -9   2  -3   12.90    3.30 
   9   2   3   12.40    1.50 
  -9   2  -3   11.50    1.40 
   9   2   3   12.80    1.70 
 -10  -2  -3   19.50    3.80 
 -10  -2  -3   17.60    1.50 
  10  -2   3   15.80    1.80 
 -10   2  -3   19.30    1.80 
  10   2   3   21.00    1.80 
 -10   2  -3   22.00    3.90 
  11  -2   3    3.70    1.00 
 -11  -2  -3    3.50    1.50 
 -11   2  -3    1.60    0.80 
  11   2   3    4.10    1.00 
 -12  -2  -3   48.70    5.40 
  12  -2   3   37.00    2.80 
 -12   2  -3   36.80    2.60 
  12   2   3   38.30    2.80 
  13  -2   3   13.80    2.10 
  13   2   3   19.50    2.20 
 -13   2  -3   16.40    2.00 
 -14  -2  -3   15.30    4.90 
 -15  -2  -3   41.30    5.90 
  16  -2   3   10.60    2.50 
  16   2   3   12.80    2.50 
 -17  -3   3   39.60    7.00 
 -16  -3   3   35.10    6.70 
 -15  -3   3   51.39    6.30 
  15  -3  -3   42.00    2.90 
  15  -3  -3   38.10    3.10 
  15   3  -3   39.90    3.20 
 -14   3   3   22.90    5.40 
  13  -3  -3    3.00    0.90 
  13  -3  -3    3.30    1.00 
  13   3  -3    1.60    1.00 
 -13   3   3    2.10    1.70 
 -12  -3   3   48.30    4.90 
  12  -3  -3   45.90    2.90 
  12  -3  -3   46.80    2.70 
 -12   3   3   38.60    5.10 
  12   3  -3   44.10    2.90 
  11  -3  -3    0.10    0.70 
  11  -3  -3    0.40    0.70 
 -11  -3   3    1.50    1.20 
  11   3  -3   -0.30    0.70 
 -11   3   3    0.60    1.50 
  10  -3  -3   11.10    1.40 
  10   3  -3   11.70    1.50 
  10   3  -3   10.10    1.00 
  -9  -3   3  255.47   12.70 
   9  -3  -3  281.97   11.60 
  -9  -3   3  273.77   11.80 
   9  -3  -3  280.67   11.50 
   9   3  -3  277.27   11.60 
   9   3  -3  265.87   11.20 
  -9   3   3  267.27   13.20 
   8  -3  -3   60.99    3.00 
   8  -3  -3   62.79    3.10 
  -8  -3   3   54.49    4.10 
  -8  -3   3   63.79    3.50 
   8   3  -3   59.69    2.70 
  -8   3   3   61.49    5.10 
   8   3  -3   62.49    3.10 
  -7  -3   3   31.00    2.40 
   7  -3  -3   32.50    1.80 
  -7  -3   3   28.00    2.80 
   7  -3  -3   33.80    1.80 
   7   3  -3   34.60    1.90 
   7   3  -3   31.60    1.50 
  -7   3   3   33.40    3.80 
  -6  -3   3  145.29    7.00 
   6  -3  -3  142.49    6.20 
   6  -3  -3  148.39    6.20 
  -6  -3   3  144.09    6.60 
  -6   3   3  145.39    7.40 
   6   3  -3  141.79    6.00 
   6   3  -3  143.59    6.20 
   5  -3  -3   25.80    1.40 
  -5  -3   3   26.80    2.20 
  -5  -3   3   25.40    1.90 
   5   3  -3   24.10    1.20 
  -5   3   3   27.40    2.40 
   5   3  -3   25.20    1.40 
   4  -3  -3  140.09    5.90 
  -4  -3   3  151.18    6.50 
  -4  -3   3  136.49    6.30 
   4  -3  -3  131.19    5.90 
   4   3  -3  146.19    5.80 
   4   3  -3  132.79    5.90 
  -4   3   3  144.79    6.00 
  -4   3   3  141.19    6.60 
  -3  -3   3   21.90    1.70 
   3  -3  -3   20.90    1.20 
   3  -3  -3   24.50    1.10 
  -3  -3   3   19.70    1.70 
  -3   3   3   22.20    1.80 
   3   3  -3   21.70    1.20 
  -3   3   3   23.60    1.40 
   3   3  -3   23.90    1.10 
  -2  -3   3  336.57   14.80 
   2  -3  -3  347.87   14.40 
   2  -3  -3  378.06   14.90 
   2  -3  -3  354.86   14.50 
  -2  -3   3  367.56   14.70 
  -2   3   3  357.86   14.70 
   2   3  -3  371.76   14.40 
   2   3  -3  334.17   14.50 
  -1  -3   3   46.10    2.30 
   1  -3  -3   48.50    2.60 
  -1  -3   3   48.60    2.20 
  -1  -3   3   48.40    2.60 
   1   3  -3   52.49    2.20 
  -1   3   3   49.00    2.50 
   0  -3  -3 2476.55  108.69 
   0  -3  -3 2827.02  108.39 
   0  -3   3 2889.01  108.99 
   0  -3   3 2470.75  108.29 
   0   3  -3 2633.54  108.19 
   0   3   3 2825.22  108.69 
   0   3   3 2667.23  108.09 
  -1  -3  -3  760.82   33.70 
   1  -3   3  797.12   33.40 
   1  -3   3  885.41   33.50 
  -1   3  -3  802.42   33.40 
  -1   3  -3  767.12   33.40 
   1   3   3  841.02   33.30 
   1   3   3  922.31   33.70 
   2  -3   3   -0.30    0.30 
  -2  -3  -3   -0.40    0.30 
   2  -3   3    0.50    0.40 
  -2  -3  -3   -0.20    0.20 
   2   3   3    0.00    0.20 
  -2   3  -3   -0.10    0.30 
   2   3   3   -0.30    0.40 
  -2   3  -3    0.80    0.50 
   3  -3   3  117.99    5.10 
   3  -3   3  115.59    5.20 
  -3  -3  -3  121.49    5.00 
  -3  -3  -3  108.69    5.60 
   3  -3   3  119.99    5.20 
  -3   3  -3  129.39    5.60 
   3   3   3  121.79    5.50 
   3   3   3  119.49    5.10 
   4  -3   3  285.47   12.30 
  -4  -3  -3  308.27   13.10 
  -4  -3  -3  297.07   12.20 
   4  -3   3  293.57   12.40 
   4  -3   3  298.07   12.50 
   4   3   3  304.67   12.80 
   4   3   3  288.77   12.40 
  -4   3  -3  322.17   13.00 
  -5  -3  -3  198.78    9.00 
  -5  -3  -3  190.58    8.00 
   5  -3   3  191.18    8.20 
   5  -3   3  183.98    8.10 
   5  -3   3  191.28    8.20 
   5   3   3  186.78    8.20 
   5   3   3  194.08    8.60 
  -5   3  -3  208.38    9.00 
   6  -3   3   19.20    1.40 
  -6  -3  -3   19.20    1.10 
   6  -3   3   19.70    1.30 
  -6  -3  -3   18.40    2.30 
  -6   3  -3   19.60    2.80 
   6   3   3   17.50    1.80 
   6   3   3   17.10    1.40 
   7  -3   3   46.90    2.60 
   7  -3   3   52.09    2.50 
  -7  -3  -3   44.30    3.60 
  -7  -3  -3   48.40    2.30 
   7   3   3   48.50    3.00 
   7   3   3   47.30    2.60 
  -7   3  -3   48.20    3.90 
   8  -3   3   15.30    1.50 
  -8  -3  -3   15.60    1.10 
  -8  -3  -3   10.00    2.60 
  -8   3  -3   13.40    1.40 
  -8   3  -3   12.30    3.00 
   8   3   3   13.50    1.40 
   8   3   3   14.30    1.80 
   9  -3   3   51.79    3.10 
  -9  -3  -3   53.99    4.50 
  -9  -3  -3   54.79    2.70 
  -9   3  -3   58.29    3.10 
   9   3   3   56.79    3.10 
  -9   3  -3   52.89    4.70 
   9   3   3   58.69    3.50 
 -10  -3  -3    3.20    1.30 
  10  -3   3    5.70    1.40 
 -10   3  -3    5.20    1.00 
 -10   3  -3    4.60    1.50 
  10   3   3    4.10    1.00 
  11  -3   3   54.59    3.40 
 -11  -3  -3   54.69    5.40 
 -11   3  -3   54.29    3.30 
  11   3   3   55.39    3.30 
 -11   3  -3   63.89    5.50 
 -13  -3  -3   21.60    5.20 
 -14  -3  -3   19.10    5.10 
 -15  -3  -3   56.29    6.30 
  16  -3   3   11.50    2.10 
  16  -4  -3   14.60    2.40 
  16  -4  -3   20.10    2.70 
  16   4  -3   10.70    2.40 
  15  -4  -3   11.90    2.20 
  15  -4  -3   17.40    2.10 
 -15  -4   3   29.90    6.10 
  15   4  -3   14.20    2.40 
  14  -4  -3    1.00    0.90 
  14  -4  -3    0.20    1.00 
 -14  -4   3    3.70    2.20 
 -14   4   3    2.80    1.80 
  14   4  -3    0.60    1.00 
  13  -4  -3    1.10    0.80 
  13  -4  -3   -0.80    0.80 
 -13  -4   3    1.50    1.70 
 -13   4   3    0.50    1.50 
  13   4  -3   -0.10    0.90 
  12  -4  -3   13.20    1.70 
  12  -4  -3   10.10    1.60 
  12   4  -3   11.20    1.80 
 -12   4   3   18.70    4.70 
  11  -4  -3   51.29    3.00 
  11  -4  -3   53.09    2.90 
 -11  -4   3   49.50    4.80 
 -11  -4   3   51.69    3.40 
  11   4  -3   49.99    3.00 
 -11   4   3   47.50    5.50 
 -10  -4   3   51.69    3.50 
  10  -4  -3   52.89    3.00 
  10  -4  -3   55.29    3.00 
 -10  -4   3   55.89    4.70 
  10   4  -3   54.59    3.10 
 -10   4   3   57.89    5.70 
   9  -4  -3  125.19    5.70 
   9  -4  -3  121.79    5.60 
  -9  -4   3  129.09    6.10 
  -9  -4   3  116.49    6.90 
   9   4  -3  129.49    5.40 
  -9   4   3  124.39    7.80 
   9   4  -3  124.39    5.70 
  -8  -4   3  437.46   18.60 
   8  -4  -3  448.96   18.20 
  -8  -4   3  431.36   19.30 
   8  -4  -3  451.05   18.30 
   8   4  -3  454.25   18.30 
  -8   4   3  436.46   19.80 
   8   4  -3  428.96   17.90 
  -7  -4   3  248.88   10.60 
  -7  -4   3  225.68   10.90 
   7  -4  -3  248.18   10.10 
   7  -4  -3  239.78   10.10 
   7   4  -3  234.58    9.70 
  -7   4   3  228.68   11.40 
   7   4  -3  246.18   10.10 
   6  -4  -3   15.80    1.30 
   6  -4  -3   18.40    1.20 
  -6  -4   3   16.50    2.20 
  -6  -4   3   16.50    2.00 
   6   4  -3   18.10    1.30 
  -6   4   3   20.10    2.70 
  -5  -4   3  177.18    8.50 
   5  -4  -3  193.18    8.10 
  -5  -4   3  195.28    8.80 
  -5   4   3  202.58    9.00 
  -5   4   3  199.88    8.00 
   5   4  -3  184.58    8.10 
   4  -4  -3  112.39    4.80 
  -4  -4   3  119.39    5.40 
  -4  -4   3  109.19    5.30 
  -4   4   3  114.59    5.50 
   4   4  -3  102.19    4.80 
  -4   4   3  111.69    4.90 
   3  -4  -3   87.59    3.70 
   3  -4  -3   90.19    4.30 
  -3  -4   3   90.79    4.20 
  -3   4   3   85.19    4.00 
   3   4  -3   78.79    3.80 
   3   4  -3   92.39    3.60 
  -2  -4   3  119.59    5.20 
   2  -4  -3  124.69    5.40 
  -2  -4   3  116.99    5.40 
   2  -4  -3  116.69    5.00 
   2  -4  -3  117.89    4.90 
   2   4  -3  121.29    4.90 
   2   4  -3  107.99    5.00 
  -2   4   3  113.79    5.20 
   1  -4  -3  701.43   27.80 
  -1  -4   3  637.74   27.70 
  -1  -4   3  625.54   27.50 
   1  -4  -3  686.53   27.30 
  -1  -4   3  649.14   27.50 
   1  -4  -3  713.63   27.40 
   1   4  -3  697.33   27.40 
  -1   4   3  705.73   27.70 
   0  -4   3  314.17   11.90 
   0  -4  -3  287.87   11.80 
   0  -4   3  269.37   12.10 
   0  -4   3  279.77   11.90 
   0  -4  -3  275.47   12.30 
   0   4   3  289.27   11.70 
   0   4   3  304.17   12.20 
   0   4  -3  294.97   11.90 
   1  -4   3    0.70    0.50 
  -1  -4  -3    1.00    0.30 
  -1  -4  -3    0.30    0.40 
   1  -4   3    0.10    0.30 
   1   4   3    0.00    0.40 
  -1   4  -3    0.10    0.30 
   1   4   3    0.50    0.20 
  -1   4  -3   -0.10    0.30 
  -2  -4  -3   84.79    4.50 
  -2  -4  -3  102.19    3.90 
   2  -4   3   89.59    4.00 
   2  -4   3   90.99    4.10 
   2  -4   3   90.39    4.20 
  -2   4  -3   93.79    4.30 
   2   4   3   93.99    3.90 
   3  -4   3  632.04   27.30 
  -3  -4  -3  693.33   27.10 
   3  -4   3  666.63   27.30 
  -3  -4  -3  634.44   27.90 
   3  -4   3  666.73   27.40 
  -3   4  -3  711.63   27.70 
   3   4   3  679.03   27.70 
   3   4   3  690.03   27.30 
   4  -4   3   39.60    2.20 
  -4  -4  -3   38.40    1.80 
  -4  -4  -3   38.90    2.80 
   4  -4   3   37.30    2.10 
   4  -4   3   39.50    2.00 
   4   4   3   39.20    2.50 
  -4   4  -3   42.70    3.00 
   4   4   3   38.10    2.00 
  -5  -4  -3    0.00    0.30 
   5  -4   3    0.10    0.40 
   5  -4   3    0.50    0.50 
   5  -4   3    0.00    0.40 
  -5  -4  -3   -0.40    0.50 
  -5   4  -3    0.70    0.80 
   5   4   3    0.10    0.40 
   5   4   3    0.30    0.50 
  -6  -4  -3    0.80    0.70 
  -6  -4  -3    0.50    0.30 
   6  -4   3    0.20    0.50 
   6  -4   3    0.60    0.50 
   6   4   3    0.40    0.40 
  -6   4  -3    1.00    0.90 
   6   4   3    0.50    0.60 
   7  -4   3  141.89    6.20 
  -7  -4  -3  136.49    5.90 
  -7  -4  -3  136.79    7.30 
   7  -4   3  135.29    6.20 
  -7   4  -3  141.39    7.40 
   7   4   3  139.39    6.20 
   7   4   3  140.29    6.70 
   8  -4   3   44.10    2.60 
  -8  -4  -3   44.80    2.20 
  -8  -4  -3   45.70    3.90 
   8  -4   3   47.90    2.60 
  -8   4  -3   45.40    4.30 
   8   4   3   44.50    3.10 
   8   4   3   45.50    2.60 
  -9  -4  -3   -0.70    0.90 
   9  -4   3    0.20    0.70 
   9   4   3    0.80    0.80 
  -9   4  -3    0.50    0.70 
  -9   4  -3   -0.10    1.10 
   9   4   3    0.90    0.70 
  10  -4   3   74.49    4.10 
 -10  -4  -3   76.99    5.80 
  10   4   3   82.89    4.60 
 -10   4  -3   80.39    5.90 
 -10   4  -3   73.89    4.10 
  10   4   3   77.49    4.10 
  11  -4   3    9.90    1.60 
 -11  -4  -3   12.50    3.90 
  11   4   3    7.50    1.60 
 -11   4  -3   18.40    4.40 
 -11   4  -3    9.60    1.70 
  12  -4   3   34.00    2.70 
 -12  -4  -3   42.50    5.20 
 -12   4  -3   37.60    2.80 
  12   4   3   43.20    2.90 
 -13  -4  -3   59.39    6.60 
  13  -4   3   51.89    3.50 
 -13   4  -3   52.69    3.50 
  13   4   3   55.79    3.60 
  16  -5  -3   19.30    2.40 
  16  -5  -3   11.60    2.40 
  16   5  -3   12.80    2.60 
 -15  -5   3   24.20    6.00 
 -15   5   3   22.50    5.90 
 -14  -5   3   58.89    6.30 
  14  -5  -3   47.10    3.30 
  14  -5  -3   53.79    3.30 
  14   5  -3   47.80    3.50 
 -14   5   3   42.90    5.90 
  13  -5  -3   13.50    1.80 
  13  -5  -3   11.20    1.80 
 -13  -5   3   16.80    4.50 
  13   5  -3    9.30    1.90 
  12  -5  -3    9.50    1.60 
 -12  -5   3   12.80    4.00 
  12  -5  -3    9.40    1.70 
 -12   5   3   13.50    4.70 
  12   5  -3   12.80    1.80 
  11  -5  -3  254.37   11.20 
 -11  -5   3  243.78   12.80 
  11  -5  -3  265.67   11.10 
 -11  -5   3  259.87   11.60 
 -11   5   3  254.67   13.30 
  11   5  -3  262.97   11.30 
  10  -5  -3  391.56   16.10 
  10  -5  -3  388.76   16.20 
 -10  -5   3  364.96   16.50 
 -10  -5   3  364.16   17.50 
  10   5  -3  398.26   16.30 
 -10   5   3  393.96   18.20 
   9  -5  -3    4.60    1.10 
   9  -5  -3    0.80    0.80 
   9   5  -3    3.50    0.80 
   8  -5  -3    6.50    1.00 
  -8  -5   3    5.80    2.30 
  -8  -5   3    8.80    2.00 
   8  -5  -3    5.10    1.10 
   8   5  -3    7.10    1.10 
  -8   5   3   11.20    3.70 
  -7  -5   3   52.39    3.40 
   7  -5  -3   51.19    2.70 
  -7  -5   3   51.69    3.70 
   7  -5  -3   53.39    2.70 
   7   5  -3   51.89    2.70 
  -7   5   3   56.19    4.40 
   6  -5  -3  140.49    6.00 
  -6  -5   3  137.59    6.50 
  -6  -5   3  136.29    6.80 
   6  -5  -3  138.19    6.00 
  -6   5   3  136.39    7.10 
   6   5  -3  132.29    6.00 
  -5  -5   3   51.99    3.30 
   5  -5  -3   52.79    2.50 
  -5  -5   3   46.10    3.20 
  -5   5   3   55.99    3.60 
  -5   5   3   52.49    2.50 
   5   5  -3   50.09    2.50 
   4  -5  -3  384.56   15.60 
  -4  -5   3  385.86   16.20 
   4  -5  -3  383.26   15.70 
  -4  -5   3  369.46   16.10 
  -4   5   3  385.76   15.80 
  -4   5   3  403.96   16.50 
   4   5  -3  359.86   15.70 
   3  -5  -3   15.00    1.60 
  -3  -5   3   16.10    1.80 
   3  -5  -3   13.70    0.90 
   3  -5  -3   13.30    1.00 
  -3  -5   3   14.00    1.50 
   3   5  -3   12.60    1.00 
  -3   5   3   13.00    1.20 
   3   5  -3   14.70    0.80 
   2  -5  -3  864.71   34.50 
  -2  -5   3  847.62   34.90 
   2  -5  -3  917.31   35.10 
   2  -5  -3  778.02   34.60 
  -2   5   3  885.11   34.90 
   2   5  -3  797.52   34.60 
   2   5  -3  892.01   34.50 
   1  -5  -3   48.50    2.20 
  -1  -5   3   53.49    2.80 
   1  -5  -3   44.80    2.10 
  -1  -5   3   45.30    2.40 
  -1  -5   3   43.60    2.30 
   1  -5  -3   46.10    2.70 
  -1   5   3   48.60    2.60 
   1   5  -3   49.20    2.20 
   0  -5  -3 1303.87   54.59 
   0  -5  -3 1349.36   54.39 
   0  -5  -3 1381.06   54.39 
   0  -5   3 1262.77   54.39 
   0  -5   3 1417.06   54.29 
   0  -5   3 1260.87   54.19 
   0   5   3 1409.66   54.59 
   0   5  -3 1377.26   54.19 
   0   5   3 1315.97   54.09 
  -1  -5  -3  258.67   10.10 
   1  -5   3  238.58   10.30 
  -1  -5  -3  231.28   10.70 
   1  -5   3  223.38   10.20 
  -1  -5  -3  264.47   10.60 
   1  -5   3  272.27   10.50 
  -1   5  -3  241.08   10.20 
   1   5   3  244.28   10.10 
  -2  -5  -3  443.16   16.70 
   2  -5   3  401.46   17.00 
   2  -5   3  394.96   16.80 
  -2  -5  -3  378.76   17.10 
   2  -5   3  402.16   16.90 
  -2  -5  -3  404.56   17.50 
   2   5   3  417.86   16.80 
  -2   5  -3  444.36   17.10 
   3  -5   3  114.09    5.10 
  -3  -5  -3  116.29    4.80 
  -3  -5  -3  118.49    5.50 
   3  -5   3  115.79    5.30 
   3  -5   3  112.09    5.10 
  -3  -5  -3  118.59    5.90 
   3   5   3  118.29    5.00 
  -3   5  -3  121.29    5.50 
   4  -5   3    2.30    0.60 
  -4  -5  -3    0.90    0.60 
   4  -5   3    1.80    0.50 
  -4  -5  -3    1.90    0.70 
   4  -5   3    2.30    0.50 
   4   5   3    1.90    0.50 
  -4   5  -3    1.30    0.80 
  -5  -5  -3   71.39    4.40 
   5  -5   3   76.69    3.60 
   5  -5   3   76.89    3.60 
   5  -5   3   78.29    3.60 
   5   5   3   75.59    3.50 
   5   5   3   75.19    4.20 
  -5   5  -3   76.49    4.60 
   6  -5   3    1.00    0.60 
  -6  -5  -3    0.10    0.60 
   6  -5   3    0.30    0.60 
   6   5   3    0.80    0.70 
   6   5   3    1.50    0.50 
  -6   5  -3    0.10    1.00 
   7  -5   3  146.99    6.30 
  -7  -5  -3  134.69    7.40 
   7  -5   3  141.39    6.30 
  -7   5  -3  138.79    7.60 
   7   5   3  143.09    6.90 
   7   5   3  134.59    6.30 
   8  -5   3   32.70    2.20 
  -8  -5  -3   32.20    3.50 
   8  -5   3   34.00    2.20 
   8   5   3   31.90    2.80 
  -8   5  -3   32.70    4.20 
   8   5   3   33.10    2.20 
   9  -5   3   -0.90    0.70 
  -9  -5  -3    0.60    1.00 
   9  -5   3    0.70    0.70 
   9   5   3   -0.60    0.70 
  -9   5  -3    0.50    1.20 
   9   5   3    0.00    0.80 
 -10  -5  -3    3.80    1.40 
  10  -5   3    4.50    1.10 
  10   5   3    7.10    1.50 
  10   5   3    7.10    2.10 
 -10   5  -3    5.50    1.20 
 -10   5  -3    9.70    3.50 
 -11  -5  -3   15.80    4.00 
  11  -5   3   12.50    1.70 
  11   5   3   14.80    1.90 
 -11   5  -3   10.60    1.90 
  12  -5   3   11.50    1.90 
 -12  -5  -3   17.20    4.90 
  12   5   3    9.90    1.90 
 -12   5  -3   13.00    2.00 
 -13  -5  -3   17.40    5.40 
  13  -5   3   11.30    2.00 
  13   5   3   11.30    2.00 
 -13   5  -3   12.40    2.20 
 -14  -5  -3   18.30    5.80 
  14  -5   3   13.80    2.30 
 -14   5  -3   14.40    2.40 
  14   5   3   15.70    2.30 
  15  -5   3   22.40    2.70 
 -15   5  -3   24.30    2.80 
  15   5   3   25.20    2.90 
 -16   6   3   42.00    7.20 
  15  -6  -3   15.40    2.40 
  15  -6  -3   21.80    2.60 
 -15   6   3   25.40    5.70 
  15   6  -3   22.60    2.70 
  14  -6  -3    1.60    1.10 
  14  -6  -3   -0.60    1.00 
 -14   6   3    0.40    1.70 
  14   6  -3    0.60    1.10 
  13  -6  -3    8.50    1.80 
 -13  -6   3   15.40    4.90 
  13  -6  -3    8.30    1.90 
  13   6  -3    9.00    1.90 
 -12  -6   3   20.00    4.30 
  12  -6  -3   15.30    1.80 
  12  -6  -3   15.80    1.90 
  12   6  -3   14.60    1.90 
 -12   6   3   11.90    4.70 
 -11  -6   3    3.30    1.10 
  11  -6  -3    4.50    1.00 
  11  -6  -3    3.80    1.00 
 -11  -6   3    2.80    1.50 
  11   6  -3    4.10    1.00 
 -11   6   3    2.80    1.70 
 -10  -6   3   11.10    3.40 
 -10  -6   3    1.80    1.00 
  10  -6  -3    2.10    0.90 
  10   6  -3    2.20    0.90 
 -10   6   3   11.90    4.60 
  -9  -6   3  125.59    7.40 
  -9  -6   3  124.89    6.60 
   9  -6  -3  134.09    6.00 
   9  -6  -3  138.59    6.00 
   9   6  -3  132.09    6.10 
  -9   6   3  133.29    8.40 
   8  -6  -3  291.17   12.00 
  -8  -6   3  281.77   13.10 
   8  -6  -3  286.17   12.00 
  -8  -6   3  274.37   12.50 
   8   6  -3  289.77   12.10 
  -8   6   3  276.57   13.60 
  -7  -6   3    9.30    2.30 
  -7  -6   3    6.70    2.10 
   7  -6  -3    9.00    1.20 
   7  -6  -3   10.40    1.10 
   7   6  -3    9.70    1.10 
  -7   6   3    9.70    3.00 
   6  -6  -3   35.40    1.90 
  -6  -6   3   28.50    2.80 
   6  -6  -3   29.90    1.90 
  -6  -6   3   28.90    2.70 
  -6   6   3   34.70    3.20 
   6   6  -3   32.40    1.90 
  -6   6   3   34.00    1.80 
   5  -6  -3   28.10    1.60 
  -5  -6   3   26.40    2.40 
   5  -6  -3   26.10    1.60 
  -5  -6   3   25.80    2.40 
   5   6  -3   27.50    1.60 
  -5   6   3   26.50    1.70 
  -5   6   3   28.90    2.60 
  -4  -6   3   77.49    4.30 
   4  -6  -3   77.39    3.50 
  -4  -6   3   85.69    4.30 
   4  -6  -3   77.79    3.60 
   4   6  -3   76.49    3.60 
  -4   6   3   85.49    4.60 
  -4   6   3   74.89    3.70 
  -3  -6   3    6.10    1.70 
   3  -6  -3    5.00    1.40 
  -3  -6   3    5.10    1.30 
   3  -6  -3    4.50    0.60 
   3  -6  -3    3.90    0.80 
  -3   6   3    4.40    1.10 
   3   6  -3    4.40    0.50 
   3   6  -3    4.90    0.70 
   2  -6  -3    9.70    1.40 
  -2  -6   3    8.10    1.70 
   2  -6  -3    7.80    0.80 
  -2  -6   3    7.60    1.30 
   2  -6  -3    7.80    0.70 
   2   6  -3    8.40    0.70 
   2   6  -3    7.70    0.80 
  -2   6   3    8.40    1.20 
   1  -6  -3   25.30    2.00 
   1  -6  -3   22.30    1.20 
  -1  -6   3   24.60    2.10 
  -1  -6   3   23.00    1.40 
   1  -6  -3   25.10    1.70 
   1  -6  -3   26.30    1.30 
  -1  -6   3   24.80    1.70 
   1   6  -3   24.70    1.30 
   0  -6  -3   38.50    2.60 
   0  -6   3   48.70    2.70 
   0  -6  -3   40.60    1.90 
   0  -6   3   40.00    2.20 
   0  -6  -3   43.60    2.50 
   0  -6   3   35.30    2.00 
   0   6  -3   39.70    2.00 
   0   6   3   38.40    1.80 
   1  -6   3   33.10    1.90 
  -1  -6  -3   38.90    1.70 
   1  -6   3   37.20    2.40 
  -1  -6  -3   37.50    2.40 
  -1  -6  -3   34.20    2.50 
   1  -6   3   31.10    1.80 
   1  -6   3   36.20    2.00 
   1   6   3   36.40    1.70 
   2  -6   3  255.87   10.80 
  -2  -6  -3  253.47   10.90 
  -2  -6  -3  271.27   10.30 
  -2  -6  -3  250.17   11.20 
   2  -6   3  237.18   10.60 
   2  -6   3  238.38   10.50 
  -2   6  -3  261.77   10.80 
   2   6   3  248.98   10.40 
   3  -6   3  301.07   12.70 
  -3  -6  -3  291.97   13.00 
   3  -6   3  298.17   12.70 
  -3  -6  -3  308.87   13.50 
   3  -6   3  306.47   12.80 
  -3   6  -3  317.47   13.10 
   3   6   3  311.47   12.60 
   4  -6   3   10.90    1.10 
   4  -6   3   11.60    1.60 
  -4  -6  -3   11.80    2.00 
   4  -6   3   11.40    1.10 
  -4  -6  -3    9.30    1.70 
   4   6   3   10.90    1.00 
  -4   6  -3   10.90    2.00 
   5  -6   3   24.90    1.90 
  -5  -6  -3   22.40    2.60 
  -5  -6  -3   22.30    2.20 
   5  -6   3   23.90    1.60 
   5  -6   3   23.10    1.60 
  -5   6  -3   25.30    3.00 
   5   6   3   26.30    1.60 
   6  -6   3  100.89    4.70 
  -6  -6  -3   95.99    5.70 
   6  -6   3  101.19    4.70 
   6   6   3  102.69    5.40 
   6   6   3   96.89    4.60 
  -6   6  -3  100.09    5.90 
  -7  -6  -3  218.08   10.80 
   7  -6   3  229.98    9.70 
   7  -6   3  218.98    9.70 
  -7   6  -3  218.88   10.90 
   7   6   3  233.18   10.40 
   7   6   3  217.78    9.60 
  -8  -6  -3   96.29    6.10 
   8  -6   3   96.19    4.70 
   8  -6   3  100.19    4.70 
   8   6   3   96.19    4.70 
  -8   6  -3   90.49    6.40 
   8   6   3   98.89    5.50 
   9  -6   3   71.09    3.80 
   9  -6   3   74.49    3.80 
  -9  -6  -3   70.89    5.50 
  -9   6  -3   66.79    5.60 
   9   6   3   76.69    4.70 
   9   6   3   67.59    3.80 
  10  -6   3    5.20    1.10 
 -10  -6  -3    3.80    1.50 
  10   6   3    4.30    1.00 
 -10   6  -3    1.90    1.40 
 -10   6  -3    3.20    1.10 
  10   6   3    2.50    1.10 
  11  -6   3   25.20    2.30 
 -11  -6  -3   32.40    5.00 
 -11   6  -3   28.70    2.50 
  11   6   3   28.70    2.40 
 -11   6  -3   32.90    4.60 
 -12  -6  -3    0.80    1.80 
 -16   7   3   25.00    6.50 
 -15  -7   3   51.49    7.20 
  15  -7  -3   48.80    3.50 
  15  -7  -3   38.50    3.30 
 -15   7   3   37.40    6.40 
  15   7  -3   47.70    3.60 
  14  -7  -3    1.40    1.10 
  14  -7  -3    0.40    1.00 
 -14   7   3    3.50    2.10 
  14   7  -3    3.90    1.30 
 -13  -7   3    2.10    2.00 
  13  -7  -3    2.00    1.10 
  13  -7  -3    0.20    0.90 
 -13   7   3   -0.80    1.70 
  13   7  -3    0.80    1.10 
 -12  -7   3    2.00    1.70 
  12  -7  -3    1.40    1.00 
 -12  -7   3    8.00    2.40 
  12  -7  -3    2.80    1.00 
  12   7  -3    1.30    1.00 
 -12   7   3   -0.70    1.70 
 -11   7   3   14.90    4.80 
   9  -7  -3    5.70    1.30 
  -9  -7   3    4.90    1.40 
   9  -7  -3    5.90    1.10 
  -9  -7   3    5.40    1.30 
  -9   7   3   15.90    4.60 
   9   7  -3    8.70    1.40 
   8  -7  -3   11.80    1.30 
   8  -7  -3    8.10    1.40 
  -8  -7   3    8.60    2.40 
  -8  -7   3   13.90    2.90 
  -8   7   3   17.70    3.90 
   8   7  -3   11.90    1.40 
   7  -7  -3    0.20    0.60 
   7  -7  -3    1.60    0.60 
  -7  -7   3    0.50    0.80 
  -7  -7   3    0.80    1.00 
   7   7  -3    1.00    0.60 
  -7   7   3    1.20    1.10 
  -6  -7   3   14.50    2.30 
   6  -7  -3   15.40    1.20 
  -6  -7   3   13.30    2.30 
   6  -7  -3   12.40    1.30 
  -6   7   3   13.00    1.30 
   6   7  -3   14.10    1.20 
  -6   7   3   16.40    2.60 
   5  -7  -3  103.69    4.80 
  -5  -7   3  104.89    5.60 
  -5  -7   3  109.59    5.60 
   5  -7  -3  109.59    4.80 
   5   7  -3  104.69    4.80 
  -5   7   3  108.49    5.80 
  -5   7   3  106.29    4.90 
   4  -7  -3   50.89    2.60 
   4  -7  -3   52.79    2.50 
  -4  -7   3   53.49    3.40 
   4  -7  -3   53.99    3.40 
  -4  -7   3   50.99    3.30 
  -4   7   3   50.69    2.80 
   3  -7  -3   24.80    1.40 
  -3  -7   3   24.90    2.10 
   3  -7  -3   26.80    2.20 
   3  -7  -3   23.30    1.50 
  -3  -7   3   24.40    2.50 
  -3   7   3   23.20    1.80 
   3   7  -3   25.70    1.20 
   3   7  -3   25.60    1.50 
   2  -7  -3  127.59    6.00 
  -2  -7   3  117.19    5.80 
   2  -7  -3  120.39    5.30 
   2  -7  -3  120.59    5.30 
  -2  -7   3  129.09    6.10 
   2   7  -3  122.69    5.40 
   2   7  -3  128.29    5.20 
  -2   7   3  126.29    5.80 
   1  -7  -3    0.00    0.40 
   1  -7  -3    1.30    0.40 
  -1  -7   3    0.30    0.40 
  -1  -7   3    0.40    0.40 
  -1  -7   3    1.30    0.80 
   1  -7  -3   -0.40    0.50 
   1  -7  -3    0.30    0.50 
   1   7  -3    0.50    0.40 
   0  -7  -3    2.30    0.70 
   0  -7   3    3.30    0.80 
   0  -7  -3    5.10    0.60 
   0  -7   3    4.20    1.10 
   0  -7   3    5.70    1.90 
   0   7  -3    4.00    0.80 
   0   7   3    4.20    0.60 
  -1  -7  -3 1514.35   58.29 
   1  -7   3 1294.07   57.79 
  -1  -7  -3 1411.26   58.49 
  -1  -7  -3 1545.95   57.69 
   1  -7   3 1345.77   57.89 
   1  -7   3 1484.25   58.09 
   1   7   3 1422.46   57.69 
  -2  -7  -3  503.75   20.30 
   2  -7   3  464.05   19.90 
   2  -7   3  452.95   19.80 
  -2  -7  -3  533.75   19.60 
   2  -7   3  490.05   20.10 
  -2  -7  -3  464.25   20.60 
   2   7   3  467.05   19.70 
  -2   7  -3  490.95   20.20 
  -3  -7  -3    0.10    0.60 
   3  -7   3    0.00    0.50 
   3  -7   3   -0.30    0.40 
   3  -7   3    0.30    0.70 
  -3  -7  -3    0.10    0.70 
   3   7   3    0.00    0.40 
  -3   7  -3   -0.50    0.50 
  -4  -7  -3   23.40    2.50 
  -4  -7  -3   23.00    2.20 
   4  -7   3   18.80    2.00 
   4  -7   3   23.10    1.50 
   4  -7   3   22.90    1.60 
  -4   7  -3   22.30    2.40 
   4   7   3   22.80    1.40 
   5  -7   3  703.03   28.40 
   5  -7   3  676.33   28.30 
   5  -7   3  714.03   28.40 
  -5  -7  -3  623.64   28.70 
  -5  -7  -3  711.83   29.50 
   5   7   3  714.43   28.30 
  -5   7  -3  702.43   29.10 
   6  -7   3    9.60    1.30 
   6  -7   3   10.50    1.30 
  -6  -7  -3    7.70    1.90 
  -6  -7  -3    9.70    2.40 
   6   7   3    9.70    1.20 
  -6   7  -3   14.60    3.30 
   7  -7   3    0.00    0.60 
  -7  -7  -3    0.00    0.90 
   7  -7   3   -0.10    0.70 
   7   7   3    0.40    0.90 
   7   7   3    0.10    0.60 
  -7   7  -3    1.60    1.30 
   8  -7   3    6.40    1.50 
   8  -7   3    7.70    1.40 
  -8  -7  -3    8.80    3.00 
   8   7   3    8.10    1.30 
   8   7   3    8.00    2.30 
  -8   7  -3   11.00    3.80 
   9  -7   3    1.20    0.80 
  -9  -7  -3    0.50    1.10 
   9  -7   3    0.20    0.80 
  -9   7  -3    0.40    1.30 
   9   7   3    0.60    1.00 
   9   7   3    0.20    0.70 
 -10  -7  -3   -0.80    1.20 
  10  -7   3   -1.10    0.80 
  10   7   3   -0.40    0.80 
  10   7   3    0.80    1.00 
 -10   7  -3   -0.50    1.30 
 -11  -7  -3   55.19    6.00 
  11  -7   3   52.99    3.40 
 -11   7  -3   49.20    5.30 
 -11   7  -3   55.19    3.60 
  11   7   3   57.09    4.30 
  11   7   3   58.59    3.50 
 -12  -7  -3    0.90    1.90 
  12  -7   3    0.30    1.00 
  12   7   3    0.30    0.90 
 -12   7  -3    0.00    1.10 
  14  -7   3    9.00    2.20 
 -14  -7  -3   15.10    6.00 
 -14   7  -3    8.00    1.70 
  14   7   3    7.40    1.60 
  15  -7   3   38.20    3.40 
  15   7   3   42.50    3.50 
 -15   7  -3   39.80    3.60 
  16  -8  -3    0.80    1.30 
  16  -8  -3    3.30    1.50 
 -16   8   3    3.00    2.20 
  16   8  -3    3.40    1.50 
  15  -8  -3    1.30    1.30 
  15  -8  -3    1.70    1.20 
  15   8  -3    0.50    1.20 
 -15   8   3   -2.00    2.00 
 -14  -8   3    9.10    3.10 
  14  -8  -3    3.60    1.40 
  14  -8  -3    1.90    1.10 
  14   8  -3    3.00    1.30 
 -14   8   3    1.70    2.10 
  13  -8  -3    4.70    1.30 
  13  -8  -3    2.80    1.10 
 -13  -8   3   13.50    5.00 
  13   8  -3    3.30    1.20 
 -13   8   3    2.90    2.10 
  12  -8  -3    8.90    1.70 
 -12  -8   3   16.40    5.10 
  12  -8  -3   10.80    1.90 
  12   8  -3    9.40    1.90 
 -12   8   3    5.00    2.10 
 -11  -8   3    2.70    1.60 
 -11  -8   3    2.70    1.20 
  11  -8  -3    3.30    1.00 
  11  -8  -3    1.70    0.90 
 -11   8   3    0.80    1.80 
  11   8  -3    1.80    1.00 
 -10  -8   3    1.30    1.10 
 -10  -8   3    1.30    1.30 
  10  -8  -3   -0.10    0.80 
  10  -8  -3    0.80    0.80 
 -10   8   3    0.10    1.60 
  10   8  -3   -0.70    0.80 
   9  -8  -3   13.40    1.70 
   9  -8  -3   13.90    1.60 
  -9  -8   3   11.40    2.70 
  -9   8   3   24.70    4.60 
   9   8  -3   15.20    1.70 
   8  -8  -3   41.90    2.60 
   8  -8  -3   43.00    2.50 
  -8  -8   3   37.40    4.00 
  -8  -8   3   38.60    3.50 
   8   8  -3   44.90    2.60 
  -8   8   3   51.49    4.90 
   7  -8  -3   44.10    2.30 
  -7  -8   3   29.90    3.20 
  -7  -8   3   39.00    3.60 
   7  -8  -3   38.50    2.40 
  -7   8   3   42.80    4.10 
   7   8  -3   40.10    2.30 
  -6  -8   3   36.30    3.40 
   6  -8  -3   36.60    2.20 
   6  -8  -3   41.20    2.20 
  -6  -8   3   38.70    3.30 
   6   8  -3   39.70    2.20 
  -6   8   3   39.00    3.60 
  -6   8   3   38.80    2.30 
  -5  -8   3    2.10    1.00 
   5  -8  -3    3.20    0.70 
  -5  -8   3    1.30    0.80 
   5  -8  -3    2.50    0.60 
  -5   8   3    1.80    0.50 
   5   8  -3    1.60    0.60 
  -5   8   3    1.40    0.80 
  -4  -8   3   71.39    4.20 
  -4  -8   3   67.99    4.00 
   4  -8  -3   67.29    3.10 
   4  -8  -3   62.19    3.20 
   4  -8  -3   69.79    4.10 
  -4   8   3   65.99    3.50 
   4   8  -3   65.49    3.20 
  -3  -8   3   51.89    3.30 
   3  -8  -3   53.99    3.40 
   3  -8  -3   53.49    2.60 
  -3  -8   3   54.99    3.60 
   3  -8  -3   48.60    2.60 
   3   8  -3   54.69    2.40 
   3   8  -3   55.19    2.70 
  -3   8   3   54.59    3.10 
   2  -8  -3    0.70    0.40 
  -2  -8   3   -0.30    0.40 
   2  -8  -3    0.30    0.40 
   2  -8  -3    0.00    0.50 
   2  -8  -3   -0.50    0.60 
  -2  -8   3    0.10    0.80 
   2   8  -3   -0.10    0.30 
   2   8  -3    0.40    0.50 
  -1  -8   3   25.60    2.00 
   1  -8  -3   23.90    2.30 
   1  -8  -3   22.40    1.40 
  -1  -8   3   28.40    2.60 
   1  -8  -3   23.50    1.40 
   1  -8  -3   27.80    2.10 
  -1  -8   3   20.20    1.60 
   1   8  -3   23.60    1.40 
   0  -8   3  504.65   20.90 
   0  -8  -3  540.25   20.50 
   0  -8  -3  486.35   21.30 
   0  -8   3  507.15   21.10 
   0  -8  -3  498.45   21.00 
   0  -8   3  472.65   20.70 
   0   8   3  499.45   20.50 
   0   8  -3  509.15   20.60 
  -1  -8  -3   -0.20    0.60 
  -1  -8  -3    0.10    0.60 
   1  -8   3    0.50    0.50 
  -1  -8  -3    0.20    0.30 
   1  -8   3    0.20    0.80 
   1  -8   3    0.00    0.50 
   1  -8   3    0.10    0.40 
   1   8   3    0.00    0.30 
   2  -8   3 1120.19   46.50 
  -2  -8  -3 1128.19   47.30 
   2  -8   3 1122.79   46.70 
   2  -8   3 1087.19   46.40 
  -2  -8  -3 1178.38   46.20 
   2  -8   3 1132.09   46.80 
  -2  -8  -3 1259.37   47.00 
   2   8   3 1140.59   46.40 
   3  -8   3    8.90    1.90 
  -3  -8  -3    9.60    1.90 
  -3  -8  -3    9.50    2.00 
   3  -8   3    8.30    1.10 
   3  -8   3    7.90    1.00 
  -3   8  -3    8.90    1.70 
   3   8   3    7.20    0.90 
  -4  -8  -3    1.30    0.80 
  -4  -8  -3    1.30    0.80 
   4  -8   3    1.90    0.60 
   4  -8   3    2.50    0.60 
   4  -8   3    2.30    0.90 
   4   8   3    2.60    0.60 
  -4   8  -3    2.00    0.80 
   5  -8   3   44.40    2.90 
   5  -8   3   46.60    2.60 
  -5  -8  -3   47.10    3.80 
   5  -8   3   46.20    2.60 
  -5  -8  -3   44.70    3.30 
  -5   8  -3   48.80    3.80 
   5   8   3   49.00    2.50 
   6  -8   3  118.49    5.50 
  -6  -8  -3  115.69    6.70 
  -6  -8  -3  113.49    6.10 
   6  -8   3  117.49    5.50 
   6   8   3  119.29    5.40 
  -6   8  -3  115.29    6.80 
  -7  -8  -3  140.09    8.00 
   7  -8   3  144.79    6.70 
   7  -8   3  152.38    6.80 
   7   8   3  148.99    7.60 
   7   8   3  149.29    6.60 
  -7   8  -3  142.89    8.30 
   8  -8   3  142.79    6.40 
  -8  -8  -3  126.09    7.80 
   8  -8   3  137.99    6.40 
   8   8   3  130.99    7.20 
   8   8   3  137.29    6.30 
  -8   8  -3  134.99    8.10 
  -9  -8  -3   19.30    4.10 
   9  -8   3   18.90    1.90 
   9  -8   3   19.30    2.00 
   9   8   3   17.90    1.80 
  -9   8  -3   16.10    4.20 
   9   8   3   18.00    2.90 
 -10  -8  -3   29.10    4.90 
  10  -8   3   23.00    2.20 
  10  -8   3   26.50    2.30 
  10   8   3   23.40    3.10 
 -10   8  -3   19.90    4.60 
  10   8   3   21.50    2.10 
 -11  -8  -3    5.20    2.00 
  11  -8   3    5.00    1.30 
 -11   8  -3    1.80    1.60 
 -11   8  -3    6.50    1.50 
  11   8   3    5.00    1.20 
  11   8   3    4.60    1.40 
 -12  -8  -3   34.90    6.10 
  12  -8   3   29.70    2.70 
  12   8   3   32.50    2.80 
 -12   8  -3   29.60    2.90 
 -12   8  -3   37.60    5.10 
  13  -8   3    0.30    1.10 
 -13  -8  -3    2.80    2.40 
 -13   8  -3   -0.20    1.20 
  13   8   3   -1.00    1.00 
 -14  -8  -3   31.40    6.20 
  14  -9  -3   46.20    3.30 
 -14  -9   3   59.79    7.00 
  14  -9  -3   46.30    3.50 
 -14   9   3   28.70    6.50 
  14   9  -3   43.50    3.50 
  13  -9  -3   19.00    2.20 
  13  -9  -3   21.20    2.50 
 -13  -9   3   26.30    5.90 
  13   9  -3   18.00    2.40 
  12  -9  -3    1.30    1.10 
 -12  -9   3    2.80    2.00 
 -12  -9   3    1.70    1.10 
  12  -9  -3    0.10    0.90 
  12   9  -3    0.90    1.00 
 -12   9   3   -1.90    1.70 
  11  -9  -3   14.20    2.00 
 -11  -9   3   21.10    4.90 
 -11  -9   3   22.70    3.20 
  11  -9  -3   14.30    1.80 
  11   9  -3   12.20    1.90 
  10  -9  -3  115.19    5.50 
 -10  -9   3  109.59    6.30 
  10  -9  -3  111.19    5.40 
 -10  -9   3  111.89    7.60 
 -10   9   3  105.99    8.10 
  10   9  -3  118.49    5.60 
  -9  -9   3   50.79    4.10 
  -9  -9   3   55.39    5.00 
   9  -9  -3   55.89    3.10 
   9  -9  -3   49.30    3.10 
  -9   9   3   53.29    5.60 
   9   9  -3   55.89    3.20 
  -8  -9   3    3.70    1.30 
   8  -9  -3    5.10    1.00 
   8  -9  -3    5.70    1.00 
  -8  -9   3    2.40    1.20 
  -8   9   3    4.30    1.50 
   8   9  -3    5.90    1.40 
  -7  -9   3   -0.30    1.00 
  -7  -9   3    0.20    0.90 
   7  -9  -3    0.20    0.60 
   7  -9  -3    0.10    0.70 
   7   9  -3    1.00    0.70 
  -7   9   3    0.20    1.10 
   6  -9  -3   10.70    1.40 
   6  -9  -3   11.80    1.20 
  -6  -9   3   12.90    2.50 
  -6  -9   3   10.50    2.60 
  -6   9   3   17.00    2.80 
   6   9  -3   11.50    1.30 
  -6   9   3    8.80    1.40 
  -5  -9   3    0.10    1.00 
   5  -9  -3    0.60    0.50 
   5  -9  -3    0.30    0.60 
  -5  -9   3    0.10    0.70 
  -5   9   3    0.20    0.50 
  -5   9   3    0.20    0.70 
   5   9  -3   -0.50    0.50 
  -4  -9   3    1.30    0.70 
   4  -9  -3    1.00    0.60 
   4  -9  -3    1.90    0.50 
  -4  -9   3    1.10    1.00 
   4  -9  -3    0.90    0.70 
   4   9  -3    1.30    0.50 
  -4   9   3    1.20    0.60 
   3  -9  -3   32.80    2.70 
   3  -9  -3   29.70    1.80 
  -3  -9   3   31.90    3.10 
  -3  -9   3   30.50    2.60 
   3  -9  -3   33.90    1.80 
  -3   9   3   33.80    2.40 
   3   9  -3   33.60    1.60 
   3   9  -3   33.50    1.90 
  -2  -9   3   20.30    2.70 
   2  -9  -3   17.30    2.20 
   2  -9  -3   21.90    1.40 
  -2  -9   3   21.50    2.10 
   2  -9  -3   19.60    1.30 
   2  -9  -3   18.00    1.90 
   2   9  -3   20.30    1.20 
   2   9  -3   21.30    1.50 
   1  -9  -3  307.87   13.10 
   1  -9  -3  294.47   12.60 
  -1  -9   3  290.97   12.80 
   1  -9  -3  303.47   13.50 
   1  -9  -3  311.77   12.60 
  -1  -9   3  307.07   13.20 
  -1  -9   3  306.57   13.40 
   1   9  -3  313.07   12.60 
   0  -9   3  801.42   32.30 
   0  -9   3  727.93   32.00 
   0  -9  -3  755.12   32.70 
   0  -9  -3  810.62   32.40 
   0  -9  -3  800.72   31.70 
   0  -9   3  776.92   32.40 
   0   9   3  781.32   31.80 
   0   9  -3  805.82   31.90 
  -1  -9  -3  138.29    6.40 
   1  -9   3  121.79    5.70 
  -1  -9  -3  133.99    6.80 
  -1  -9  -3  138.19    5.60 
   1  -9   3  132.59    6.20 
   1  -9   3  125.59    5.90 
   1  -9   3  133.29    6.50 
   1   9   3  130.59    5.70 
   2  -9   3  158.58    7.40 
  -2  -9  -3  160.68    7.70 
  -2  -9  -3  165.78    6.80 
   2  -9   3  182.18    7.70 
   2  -9   3  156.48    7.20 
  -2  -9  -3  164.08    8.10 
   2  -9   3  154.68    7.10 
   2   9   3  162.38    6.90 
  -3  -9  -3   36.30    3.20 
   3  -9   3   34.90    2.10 
   3  -9   3   33.10    2.00 
  -3  -9  -3   37.40    2.80 
   3  -9   3   33.90    2.90 
   3   9   3   35.10    1.90 
  -3   9  -3   33.00    2.70 
  -4  -9  -3   57.79    3.90 
   4  -9   3   66.19    3.80 
   4  -9   3   65.69    3.30 
  -4  -9  -3   66.79    4.50 
   4  -9   3   64.49    3.40 
  -4   9  -3   68.89    4.20 
   4   9   3   65.89    3.20 
  -5  -9  -3   35.20    3.10 
   5  -9   3   40.90    2.90 
   5  -9   3   40.50    2.40 
   5  -9   3   40.00    2.40 
  -5  -9  -3   40.40    3.80 
  -5   9  -3   41.30    3.60 
   5   9   3   41.40    2.30 
   6  -9   3  104.59    5.20 
  -6  -9  -3  112.29    6.00 
  -6  -9  -3  103.79    6.50 
   6  -9   3  109.19    5.20 
  -6   9  -3  106.89    6.50 
   6   9   3  109.99    5.00 
  -7  -9  -3    1.30    1.10 
  -7  -9  -3    1.60    1.10 
   7  -9   3    1.30    0.90 
   7  -9   3    1.90    0.90 
   7   9   3    2.00    0.80 
   7   9   3    1.70    1.10 
  -7   9  -3   -0.20    1.30 
   8  -9   3    0.90    0.90 
  -8  -9  -3    2.20    1.30 
   8  -9   3    0.80    0.90 
  -8   9  -3    0.10    1.40 
   8   9   3    1.00    0.80 
   8   9   3    0.40    1.10 
   9  -9   3   65.09    3.50 
   9  -9   3   55.19    3.40 
  -9  -9  -3   52.29    5.40 
   9   9   3   54.19    4.40 
   9   9   3   57.09    3.30 
  -9   9  -3   50.49    5.50 
  10  -9   3   83.09    4.60 
 -10  -9  -3   92.89    7.10 
  10  -9   3   90.59    4.70 
 -10   9  -3   81.29    6.70 
  10   9   3   82.29    5.60 
  10   9   3   82.09    4.50 
  11  -9   3    4.10    1.20 
 -11  -9  -3    4.30    2.10 
 -11   9  -3    3.80    1.40 
 -11   9  -3    1.10    1.60 
  11   9   3    4.30    1.50 
  11   9   3    4.20    1.20 
 -12  -9  -3   22.60    5.60 
  12  -9   3   15.50    2.30 
 -12   9  -3   21.10    2.70 
  12   9   3   19.40    2.40 
 -12   9  -3   21.60    4.80 
 -13  -9  -3   16.80    5.60 
  13  -9   3    7.80    1.60 
 -13   9  -3   11.50    2.50 
  13   9   3    8.80    1.70 
  15 -10  -3   13.10    2.70 
  15 -10  -3    7.40    1.60 
  15  10  -3    7.60    1.80 
  14 -10  -3    0.80    1.10 
 -14 -10   3    2.70    2.70 
  14 -10  -3    2.90    1.50 
  14  10  -3    1.20    1.30 
 -14  10   3   -0.80    2.20 
  13 -10  -3   40.50    3.20 
 -13 -10   3   56.89    4.60 
  13 -10  -3   49.00    3.50 
 -13 -10   3   50.79    6.90 
 -13  10   3   31.40    6.50 
  13  10  -3   47.00    3.50 
 -12 -10   3   18.70    5.60 
  12 -10  -3   12.30    1.90 
  12 -10  -3   14.50    2.40 
 -12 -10   3   21.00    3.30 
  12  10  -3   14.40    2.20 
  11 -10  -3    3.50    1.20 
 -11 -10   3    1.50    1.80 
  11 -10  -3    2.40    1.00 
 -11 -10   3    2.00    1.30 
  11  10  -3    1.30    1.00 
 -11  10   3   -0.90    1.80 
 -10 -10   3   19.80    3.30 
 -10 -10   3   29.10    4.90 
 -10  10   3   22.50    5.20 
   9 -10  -3   25.60    2.30 
   9 -10  -3   26.40    2.00 
  -9 -10   3   23.80    3.30 
  -9 -10   3   21.90    4.10 
  -9  10   3   20.80    4.50 
   9  10  -3   26.30    2.20 
   8 -10  -3    0.50    0.80 
  -8 -10   3    0.50    1.10 
  -8 -10   3   -0.90    1.10 
   8 -10  -3    0.00    0.70 
   8  10  -3    0.20    0.70 
  -8  10   3   -0.40    1.20 
  -7 -10   3  127.69    7.50 
   7 -10  -3  144.59    6.20 
  -7 -10   3  121.19    7.00 
   7 -10  -3  130.39    6.20 
   7  10  -3  145.29    6.30 
  -7  10   3  140.79    8.00 
  -6 -10   3   24.70    3.20 
   6 -10  -3   19.50    1.80 
   6 -10  -3   21.10    1.60 
  -6 -10   3   21.30    3.20 
  -6  10   3   23.90    3.30 
  -6  10   3   20.20    2.00 
   6  10  -3   24.00    1.80 
  -5 -10   3   42.80    3.60 
  -5 -10   3   37.10    3.60 
   5 -10  -3   38.60    2.40 
   5 -10  -3   42.50    2.30 
  -5  10   3   42.20    3.70 
  -5  10   3   40.50    2.70 
   5  10  -3   45.90    2.50 
   4 -10  -3  135.69    6.80 
  -4 -10   3  135.39    6.90 
   4 -10  -3  127.19    5.80 
   4 -10  -3  121.09    5.80 
  -4 -10   3  141.69    6.90 
  -4  10   3  128.19    6.30 
   4  10  -3  130.29    5.90 
   3 -10  -3    4.50    0.80 
   3 -10  -3    3.20    0.70 
  -3 -10   3    2.30    0.80 
   3 -10  -3    1.80    0.80 
  -3 -10   3    1.90    1.20 
  -3  10   3    2.80    0.80 
   3  10  -3    3.00    0.70 
   3  10  -3    3.40    0.70 
   2 -10  -3    0.60    0.50 
   2 -10  -3    0.80    0.50 
   2 -10  -3    0.10    0.70 
  -2 -10   3    0.50    0.60 
  -2 -10   3    1.00    1.10 
   2 -10  -3    0.60    0.80 
   2  10  -3    0.70    0.60 
   2  10  -3    1.30    0.50 
  -1 -10   3    0.70    0.60 
   1 -10  -3    0.90    0.50 
  -1 -10   3   -0.10    0.60 
   1 -10  -3    1.10    0.50 
   1 -10  -3   -0.10    0.70 
   1 -10  -3    0.20    0.80 
  -1 -10   3    0.00    1.10 
   1  10  -3    0.00    0.50 
   0 -10   3  506.35   22.40 
   0 -10   3  557.74   22.90 
   0 -10  -3  545.55   22.10 
   0 -10   3  543.15   22.80 
   0 -10  -3  525.45   23.10 
   0 -10  -3  553.94   22.80 
   0  10   3  538.65   22.20 
   0  10  -3  567.14   22.30 
  -1 -10  -3   48.70    2.40 
  -1 -10  -3   51.39    3.70 
   1 -10   3   50.19    3.10 
   1 -10   3   48.50    2.70 
   1 -10   3   51.69    3.70 
   1 -10   3   46.40    2.50 
  -1 -10  -3   55.09    3.40 
   1  10   3   48.80    2.50 
   2 -10   3    4.60    1.30 
   2 -10   3    6.30    1.70 
  -2 -10  -3    7.00    2.10 
   2 -10   3    8.30    1.10 
  -2 -10  -3    9.00    2.20 
   2 -10   3    7.90    1.20 
  -2 -10  -3    7.80    0.70 
   2  10   3    6.10    0.90 
  -3 -10  -3   57.39    3.70 
   3 -10   3   51.59    2.90 
  -3 -10  -3   57.19    4.10 
   3 -10   3   54.19    3.70 
   3 -10   3   51.39    2.80 
  -3  10  -3   57.59    3.60 
   3  10   3   51.19    2.70 
   4 -10   3    0.90    0.70 
   4 -10   3    0.20    0.70 
   4 -10   3    0.40    1.00 
  -4 -10  -3    0.30    0.90 
  -4 -10  -3    0.20    0.90 
   4  10   3    0.50    0.50 
  -4  10  -3    0.30    0.80 
   5 -10   3    2.50    0.90 
   5 -10   3    1.30    1.20 
   5 -10   3    0.80    0.80 
  -5 -10  -3    0.80    1.00 
  -5 -10  -3    1.00    1.00 
  -5  10  -3    1.40    1.00 
   5  10   3    1.70    0.70 
   6 -10   3   37.10    2.50 
  -6 -10  -3   35.00    4.00 
   6 -10   3   35.40    2.50 
  -6 -10  -3   38.20    3.50 
   6  10   3   41.90    2.40 
  -6  10  -3   36.10    4.00 
   7 -10   3  114.19    5.50 
  -7 -10  -3  115.19    7.30 
  -7 -10  -3  116.29    6.50 
   7 -10   3  117.19    5.50 
  -7  10  -3  110.39    7.30 
   7  10   3  104.69    6.50 
   7  10   3  114.39    5.40 
  -8 -10  -3    2.00    1.30 
   8 -10   3    2.10    0.90 
   8 -10   3    0.00    0.90 
  -8  10  -3    0.10    1.50 
   8  10   3    1.40    0.80 
   8  10   3    0.30    1.20 
  -9 -10  -3    1.30    1.50 
   9 -10   3    0.10    1.00 
   9 -10   3    1.20    0.90 
   9  10   3    0.00    1.10 
   9  10   3    1.40    0.90 
  -9  10  -3   -2.10    1.40 
  10 -10   3    4.70    1.20 
 -10 -10  -3    3.20    1.80 
 -10  10  -3    0.60    1.70 
  10  10   3    3.90    1.50 
  10  10   3    6.80    1.30 
  11 -10   3   37.20    3.00 
 -11 -10  -3   48.10    6.30 
  11  10   3   37.00    4.20 
 -11  10  -3   29.20    5.50 
  11  10   3   39.00    2.90 
 -11  10  -3   39.30    3.30 
 -12 -10  -3    3.60    2.30 
  12 -10   3    3.10    1.30 
  12  10   3    2.50    1.60 
 -12  10  -3    0.90    1.80 
  12  10   3    4.00    1.30 
 -12  10  -3    2.50    1.40 
 -13 -10  -3   62.59    7.50 
  13 -10   3   56.59    4.00 
 -13  10  -3   60.19    4.40 
  13  10   3   58.09    4.00 
  14 -10   3   -1.20    1.20 
 -14 -10  -3    0.80    2.40 
  14  10   3    0.80    1.30 
 -14  10  -3    0.60    1.40 
  14 -11  -3   10.80    2.60 
  14 -11  -3    9.30    2.20 
  14  11  -3   10.10    1.90 
  13 -11  -3    1.60    1.40 
  13  11  -3    0.70    1.20 
 -12 -11   3   36.90    6.10 
  12 -11  -3   30.80    2.90 
  12 -11  -3   23.30    2.40 
 -12 -11   3   36.80    4.10 
  12  11  -3   23.40    2.70 
 -12  11   3   16.60    5.70 
 -11  11   3   16.80    5.60 
 -10 -11   3   72.89    6.60 
  10 -11  -3   74.09    4.20 
 -10 -11   3   74.89    5.20 
  10 -11  -3   74.79    4.00 
  10  11  -3   77.09    4.20 
 -10  11   3   63.99    6.60 
  -9 -11   3   45.90    4.10 
   9 -11  -3   49.00    3.10 
   9 -11  -3   49.00    2.90 
  -9 -11   3   50.79    5.30 
   9  11  -3   49.30    3.10 
  -9  11   3   42.20    5.30 
  -8 -11   3   17.10    3.80 
   8 -11  -3   17.50    1.70 
  -8 -11   3   15.30    3.20 
   8 -11  -3   17.10    1.90 
  -8  11   3   15.00    3.90 
   8  11  -3   16.70    1.80 
   7 -11  -3   11.00    1.60 
   7 -11  -3   10.40    1.40 
  -7 -11   3    9.90    2.80 
  -7 -11   3   11.20    3.20 
   7  11  -3   10.60    1.50 
  -7  11   3    9.30    3.40 
   6 -11  -3   10.40    1.50 
   6 -11  -3    8.30    1.30 
  -6 -11   3    8.70    3.00 
   6  11  -3    9.60    1.40 
  -6  11   3    7.40    2.90 
   5 -11  -3    4.80    0.90 
  -5 -11   3    2.50    1.10 
   5 -11  -3    6.00    1.10 
  -5 -11   3    4.00    1.40 
  -5  11   3    5.20    1.60 
   5  11  -3    3.60    0.90 
  -5  11   3    3.20    1.20 
   4 -11  -3  104.29    4.70 
   4 -11  -3   95.99    4.70 
  -4 -11   3   95.99    5.90 
   4 -11  -3  104.09    5.80 
  -4 -11   3  101.99    5.80 
   4  11  -3  101.99    4.80 
  -4  11   3  103.89    5.30 
  -3 -11   3   15.40    2.40 
   3 -11  -3   14.70    1.40 
  -3 -11   3   17.00    3.00 
   3 -11  -3   14.00    2.40 
   3 -11  -3   14.60    1.30 
   3  11  -3   14.90    1.10 
   3  11  -3   14.80    1.40 
  -3  11   3   13.50    2.10 
  -2 -11   3   24.30    3.10 
   2 -11  -3   16.50    2.30 
   2 -11  -3   20.50    1.50 
   2 -11  -3   19.60    2.60 
   2 -11  -3   18.50    1.50 
  -2 -11   3   22.50    2.50 
   2  11  -3   20.50    1.40 
   2  11  -3   19.70    1.70 
   1 -11  -3    0.00    0.80 
  -1 -11   3    0.70    1.20 
  -1 -11   3    0.10    0.60 
  -1 -11   3   -0.80    0.70 
   1 -11  -3    0.70    0.50 
   1 -11  -3    0.10    0.90 
  -1  11   3   -1.10    0.50 
   1  11  -3   -0.40    0.60 
   0 -11  -3  615.44   26.10 
   0 -11   3  602.64   26.20 
   0 -11   3  637.64   26.10 
   0 -11  -3  627.54   25.30 
   0 -11  -3  623.44   26.50 
   0 -11   3  592.34   25.60 
   0  11   3  623.44   25.40 
   0  11  -3  646.54   25.50 
  -1 -11  -3  366.06   16.50 
   1 -11   3  363.26   15.90 
   1 -11   3  391.46   16.10 
  -1 -11  -3  391.06   16.10 
  -1 -11  -3  359.76   15.10 
   1 -11   3  354.46   15.50 
   1  11   3  355.96   15.20 
   2 -11   3    3.50    1.30 
   2 -11   3    3.30    0.80 
   2 -11   3    2.50    0.70 
  -2 -11  -3    2.60    1.00 
  -2 -11  -3    3.50    0.80 
   2 -11   3    1.90    0.80 
  -2 -11  -3    2.20    1.10 
   2  11   3    3.40    0.70 
   3 -11   3   44.00    3.50 
  -3 -11  -3   47.90    4.00 
   3 -11   3   43.60    2.60 
   3 -11   3   46.90    2.70 
  -3 -11  -3   44.50    3.50 
  -3  11  -3   48.70    3.50 
   3  11   3   45.10    2.40 
   4 -11   3    2.30    1.20 
  -4 -11  -3    2.30    1.10 
   4 -11   3    2.20    0.80 
   4 -11   3    2.20    0.80 
  -4 -11  -3    1.10    1.10 
  -4  11  -3    1.40    0.90 
   4  11   3    2.20    0.60 
  -5 -11  -3    3.50    1.30 
  -5 -11  -3    3.60    1.20 
   5 -11   3    4.10    1.00 
   5 -11   3    4.50    1.00 
  -5  11  -3    3.20    1.20 
   5  11   3    6.30    1.20 
  -6 -11  -3   13.00    3.90 
  -6 -11  -3   15.00    3.10 
   6 -11   3   16.50    1.80 
   6 -11   3   13.60    1.80 
  -6  11  -3    9.90    3.30 
   6  11   3   15.40    1.60 
   7 -11   3    1.30    0.90 
  -7 -11  -3    0.60    1.30 
  -7 -11  -3    1.70    1.30 
   7 -11   3    2.00    0.90 
   7  11   3    0.80    0.80 
  -7  11  -3   -1.20    1.40 
   7  11   3    0.20    1.10 
  -8 -11  -3    1.20    1.50 
   8 -11   3    1.30    0.90 
   8 -11   3    1.10    1.00 
  -8  11  -3   -0.30    1.60 
   8  11   3    2.10    0.90 
   8  11   3    0.80    1.30 
   9 -11   3    3.00    1.20 
  -9 -11  -3    2.50    1.80 
   9 -11   3    1.50    1.00 
   9  11   3    1.80    1.30 
  -9  11  -3   -0.40    1.60 
   9  11   3    0.80    0.90 
 -10 -11  -3    5.50    2.30 
  10 -11   3    6.60    1.40 
  10  11   3    9.90    1.80 
  10  11   3    4.00    1.50 
 -10  11  -3    4.90    1.50 
 -11 -11  -3   40.00    6.70 
  11 -11   3   36.00    3.00 
 -11  11  -3   27.20    6.90 
 -11  11  -3   39.20    3.50 
  11  11   3   39.40    4.40 
  11  11   3   41.60    3.00 
  12 -11   3    5.50    1.40 
 -12 -11  -3    6.70    2.90 
  12  11   3    5.80    1.80 
 -12  11  -3    6.90    1.80 
  12  11   3    4.70    1.40 
  13 -12  -3   22.10    2.90 
  13 -12  -3   17.90    2.30 
  13  12  -3   15.80    2.60 
 -12 -12   3   30.10    6.20 
  12 -12  -3   18.20    2.20 
  12 -12  -3   22.10    2.80 
  12  12  -3   22.00    2.70 
 -11 -12   3   55.59    4.90 
  11 -12  -3   39.70    2.90 
 -11 -12   3   43.00    6.40 
  11 -12  -3   43.90    3.30 
  11  12  -3   42.00    3.30 
 -11  12   3   32.00    6.40 
 -10 -12   3   22.10    3.80 
 -10 -12   3   18.80    5.20 
  10 -12  -3   11.80    1.80 
  10 -12  -3   14.90    2.30 
  10  12  -3   15.40    2.20 
  -9 -12   3   41.90    5.60 
   9 -12  -3   38.90    2.60 
  -9 -12   3   35.50    4.10 
   9 -12  -3   37.70    2.90 
  -9  12   3   29.60    5.10 
   9  12  -3   38.60    2.80 
  -8 -12   3   24.50    4.40 
   8 -12  -3   22.00    2.20 
  -8 -12   3   21.70    3.40 
   8 -12  -3   21.40    1.90 
  -8  12   3   18.00    4.30 
   8  12  -3   24.10    2.20 
   7 -12  -3    1.00    0.90 
  -7 -12   3    0.10    1.20 
   7 -12  -3    0.60    0.70 
  -7 -12   3    1.70    1.30 
  -7  12   3    0.00    1.20 
   7  12  -3    0.20    0.80 
  -6 -12   3   92.59    5.80 
   6 -12  -3   91.39    4.60 
   6 -12  -3   92.79    4.50 
  -6 -12   3   96.19    6.30 
   6  12  -3   93.99    4.70 
  -6  12   3   96.39    6.30 
  -5 -12   3    1.80    1.30 
   5 -12  -3    5.50    1.20 
   5 -12  -3    3.90    0.90 
  -5 -12   3    3.30    1.20 
  -5  12   3    3.00    1.20 
  -5  12   3    4.10    1.00 
   5  12  -3    4.10    0.90 
   4 -12  -3   29.80    2.10 
   4 -12  -3   34.80    3.50 
   4 -12  -3   32.10    2.10 
  -4 -12   3   36.90    3.80 
  -4 -12   3   34.50    3.60 
  -4  12   3   32.00    2.80 
   4  12  -3   31.80    2.20 
  -3 -12   3   91.19    5.30 
   3 -12  -3   84.09    4.10 
  -3 -12   3   77.79    5.40 
   3 -12  -3   84.39    5.30 
   3 -12  -3   82.79    4.10 
  -3  12   3   88.09    4.90 
   3  12  -3   88.89    4.30 
  -2 -12   3  164.28    8.40 
  -2 -12   3  173.48    8.30 
   2 -12  -3  162.88    7.30 
   2 -12  -3  166.88    8.50 
   2 -12  -3  178.38    8.10 
   2 -12  -3  161.88    7.30 
   2  12  -3  169.28    7.50 
   2  12  -3  167.18    7.20 
   1 -12  -3   11.40    2.70 
  -1 -12   3   11.70    2.30 
  -1 -12   3   14.50    3.10 
   1 -12  -3   11.00    2.50 
   1 -12  -3   11.00    1.20 
  -1  12   3    8.10    1.20 
   1  12  -3   13.00    1.40 
   1  12  -3   13.10    1.60 
   0 -12  -3  445.66   19.90 
   0 -12  -3  464.15   19.50 
   0 -12   3  484.75   19.70 
   0 -12   3  422.96   19.00 
   0 -12   3  451.35   19.50 
   0 -12  -3  447.46   18.60 
   0  12  -3  470.15   18.80 
   0  12   3  443.86   18.70 
  -1 -12  -3  306.27   14.00 
   1 -12   3  307.67   13.50 
  -1 -12  -3  309.77   14.50 
   1 -12   3  337.27   14.20 
  -1 -12  -3  314.67   13.10 
   1 -12   3  315.37   14.00 
  -1  12  -3  335.17   13.40 
   1  12   3  302.77   13.20 
  -2 -12  -3   16.30    3.00 
   2 -12   3   15.30    1.50 
   2 -12   3   17.30    3.00 
   2 -12   3   15.30    1.70 
  -2 -12  -3   16.80    2.60 
   2 -12   3   13.60    2.30 
   2  12   3   15.00    1.30 
  -3 -12  -3   21.00    3.40 
   3 -12   3   19.10    1.80 
  -3 -12  -3   20.10    2.80 
   3 -12   3   19.80    1.90 
   3 -12   3   23.90    2.90 
  -3  12  -3   24.40    2.80 
   3  12   3   20.80    1.60 
  -4 -12  -3    1.80    1.20 
   4 -12   3    3.70    1.00 
  -4 -12  -3    1.30    1.20 
   4 -12   3    2.50    0.90 
   4 -12   3    1.40    1.10 
   4  12   3    3.70    0.80 
  -4  12  -3    1.80    1.00 
  -5 -12  -3   66.69    5.60 
  -5 -12  -3   61.29    4.50 
   5 -12   3   65.19    3.60 
   5 -12   3   62.99    3.60 
  -5  12  -3   60.89    4.80 
   5  12   3   66.89    3.40 
  -6 -12  -3    6.20    1.80 
   6 -12   3    6.90    1.20 
  -6 -12  -3   11.20    3.10 
   6 -12   3    9.90    1.70 
  -6  12  -3    3.60    1.50 
   6  12   3    8.70    1.40 
   7 -12   3    7.20    1.70 
   7 -12   3    8.20    1.80 
  -7 -12  -3   13.10    3.30 
  -7 -12  -3    5.90    1.90 
   7  12   3    6.20    1.60 
  -7  12  -3    3.30    1.70 
   7  12   3    7.50    1.50 
  -8 -12  -3  119.09    8.50 
   8 -12   3  124.19    5.90 
   8 -12   3  119.69    5.90 
   8  12   3  122.09    5.80 
   8  12   3  106.29    7.10 
  -8  12  -3  104.29    8.10 
   9 -12   3    0.10    1.00 
  -9 -12  -3    0.80    2.00 
   9 -12   3   -0.90    1.00 
   9  12   3   -0.20    1.20 
  -9  12  -3   -3.20    2.00 
   9  12   3   -0.10    0.90 
 -10 -12  -3   15.00    5.80 
  10 -12   3   12.50    2.10 
 -10  12  -3   10.80    2.50 
  10  12   3   11.50    2.00 
  10  12   3   11.10    3.50 
 -11 -12  -3    6.40    2.70 
  11 -12   3    4.80    1.40 
  11  12   3    4.90    1.40 
  11  12   3    4.50    1.70 
 -11  12  -3    5.90    1.70 
  12 -12   3    1.60    1.30 
  12  12   3    3.10    1.30 
  12  12   3    1.00    1.50 
 -12  12  -3    1.40    1.50 
  13 -12   3   -1.70    1.20 
 -13 -12  -3   -0.50    2.50 
 -13  12  -3   -0.30    1.50 
  13  12   3   -1.30    1.10 
  13 -13  -3   23.60    3.10 
 -13 -13   3   27.40    6.70 
 -13 -13   3   32.70    4.80 
  13  13  -3   17.70    2.80 
  12 -13  -3    0.20    1.20 
  12 -13  -3    0.00    1.00 
  12  13  -3   -0.90    1.10 
 -12  13   3   -2.70    2.20 
  11 -13  -3    8.20    1.80 
  11 -13  -3    8.10    1.70 
 -11 -13   3   19.60    4.20 
  11  13  -3    7.00    1.60 
 -10 -13   3   30.10    4.40 
  10 -13  -3   26.10    2.80 
  10 -13  -3   24.70    2.30 
 -10 -13   3   38.80    6.10 
  10  13  -3   26.20    2.60 
  -9 -13   3   15.70    3.90 
   9 -13  -3   14.90    1.90 
  -9 -13   3   19.20    5.10 
   9 -13  -3   16.30    2.30 
   9  13  -3   14.40    2.10 
   8 -13  -3    9.40    2.00 
  -8 -13   3    5.20    1.90 
  -8 -13   3    6.70    1.80 
   8 -13  -3    7.10    1.50 
   8  13  -3    5.10    1.20 
  -8  13   3    2.70    1.70 
  -7 -13   3   47.80    5.30 
   7 -13  -3   45.70    3.00 
  -7 -13   3   43.70    4.20 
   7 -13  -3   42.70    2.80 
   7  13  -3   46.40    2.90 
  -7  13   3   46.60    5.10 
  -6 -13   3    0.30    1.30 
  -6 -13   3   -0.30    1.10 
   6 -13  -3    0.40    0.70 
   6 -13  -3    0.90    0.90 
   6  13  -3    0.30    0.80 
  -6  13   3    0.00    1.10 
  -5 -13   3    1.40    1.30 
  -5 -13   3    0.10    1.10 
   5 -13  -3    1.10    0.80 
   5 -13  -3   -0.20    0.70 
  -5  13   3    0.20    1.00 
  -5  13   3   -0.30    0.80 
   5  13  -3   -1.70    0.60 
  -4 -13   3   65.49    5.00 
   4 -13  -3   72.69    3.70 
   4 -13  -3   73.69    3.70 
  -4 -13   3   74.89    5.10 
   4 -13  -3   70.29    4.90 
  -4  13   3   71.99    4.50 
   4  13  -3   71.69    3.80 
   3 -13  -3   30.50    2.10 
  -3 -13   3   35.60    3.50 
   3 -13  -3   34.40    2.20 
  -3 -13   3   37.60    3.90 
   3 -13  -3   32.10    3.50 
   3  13  -3   30.50    2.30 
  -3  13   3   36.30    3.20 
  -2 -13   3   21.70    3.40 
   2 -13  -3   16.40    1.60 
   2 -13  -3   19.50    2.70 
  -2 -13   3   19.30    2.80 
   2 -13  -3   19.60    1.60 
   2 -13  -3   20.00    3.00 
   2  13  -3   20.20    1.90 
   1 -13  -3   91.89    5.30 
  -1 -13   3   95.49    5.60 
  -1 -13   3   90.09    5.20 
   1 -13  -3   85.09    4.20 
   1 -13  -3   87.39    5.60 
   1  13  -3   89.99    4.50 
  -1  13   3   86.49    4.20 
   1  13  -3   90.39    4.20 
   0 -13  -3   58.99    4.10 
   0 -13   3   62.19    4.40 
   0 -13   3   52.19    3.20 
   0 -13   3   57.99    3.90 
   0 -13  -3   54.19    2.80 
   0 -13  -3   58.49    4.40 
   0  13  -3   53.79    3.10 
   0  13   3   52.79    2.90 
  -1 -13  -3  147.09    7.90 
   1 -13   3  146.69    7.30 
   1 -13   3  141.09    7.40 
  -1 -13  -3  147.09    7.40 
   1 -13   3  136.59    6.70 
   1  13   3  139.89    6.40 
  -1  13  -3  152.88    6.60 
  -2 -13  -3    4.00    1.30 
   2 -13   3    3.70    1.00 
   2 -13   3    3.20    1.30 
  -2 -13  -3    2.90    1.20 
   2 -13   3    2.20    0.90 
   2  13   3    4.70    1.00 
   3 -13   3   19.50    2.00 
  -3 -13  -3   22.50    3.00 
   3 -13   3   23.00    2.90 
   3 -13   3   16.90    1.80 
  -3 -13  -3   19.60    3.60 
  -3  13  -3   21.20    2.90 
   3  13   3   19.60    1.60 
   4 -13   3   -0.40    0.80 
  -4 -13  -3    0.50    1.10 
   4 -13   3    1.50    1.20 
   4 -13   3    1.00    0.80 
  -4 -13  -3    1.10    1.40 
  -4  13  -3    0.70    1.00 
   4  13   3    1.30    0.70 
  -5 -13  -3   55.79    4.50 
   5 -13   3   50.39    3.20 
   5 -13   3   49.20    3.20 
  -5 -13  -3   50.89    5.50 
  -5  13  -3   52.29    4.70 
   5  13   3   53.89    3.00 
  -6 -13  -3   28.50    3.70 
  -6 -13  -3   18.30    4.50 
   6 -13   3   22.40    2.20 
   6 -13   3   21.00    2.20 
   6  13   3   22.20    1.90 
  -6  13  -3   15.20    3.70 
   7 -13   3   40.10    3.00 
   7 -13   3   40.50    2.90 
  -7 -13  -3   42.90    5.90 
  -7  13  -3   26.00    7.30 
   7  13   3   37.90    4.20 
   7  13   3   40.50    2.70 
   8 -13   3   35.80    3.00 
  -8 -13  -3   47.20    6.40 
   8 -13   3   35.90    2.90 
   8  13   3   32.00    4.30 
   8  13   3   35.50    2.70 
   9 -13   3    3.40    1.30 
  -9 -13  -3    3.30    2.50 
   9  13   3    1.00    1.40 
   9  13   3    2.50    1.10 
  -9  13  -3    1.90    1.30 
  10 -13   3    3.00    1.30 
 -10 -13  -3    5.90    2.80 
  10  13   3    3.50    1.70 
 -10  13  -3    2.70    1.50 
  10  13   3    2.50    1.20 
  11 -13   3   16.10    2.40 
 -11 -13  -3   18.70    6.70 
 -11  13  -3   15.20    2.80 
  11  13   3   18.70    4.10 
  11  13   3   13.70    2.30 
  12 -13   3    5.20    1.50 
  12  13   3    2.80    1.90 
 -12  13  -3    5.40    1.80 
  12  13   3    6.70    1.60 
 -11 -14   3    2.70    2.60 
  11 -14  -3    2.50    1.40 
  11  14  -3    0.20    1.20 
  10 -14  -3    5.90    1.60 
 -10 -14   3    7.50    2.20 
 -10 -14   3    6.60    2.60 
  10  14  -3    6.50    1.50 
   9 -14  -3    2.00    1.30 
   9 -14  -3    0.60    1.60 
  -9 -14   3    1.60    1.60 
  -9  14   3   -0.70    1.60 
   9  14  -3    1.50    1.10 
   8 -14  -3    2.40    1.20 
  -8 -14   3    2.20    1.60 
  -8 -14   3    2.20    1.80 
   8 -14  -3    0.50    0.90 
  -8  14   3   -0.20    1.50 
   8  14  -3    2.30    1.10 
  -7 -14   3   73.09    6.20 
   7 -14  -3   72.19    4.10 
  -7 -14   3   72.79    5.40 
   7 -14  -3   69.99    3.90 
  -7  14   3   73.49    6.20 
   7  14  -3   75.29    4.10 
   6 -14  -3   32.60    2.30 
  -6 -14   3   30.60    4.50 
   6 -14  -3   34.40    2.60 
  -6 -14   3   39.00    4.10 
  -6  14   3   32.90    4.30 
   6  14  -3   33.40    2.50 
   5 -14  -3    1.70    0.90 
  -5 -14   3    1.80    1.50 
   5 -14  -3    0.10    0.80 
  -5 -14   3   -0.30    1.20 
   5  14  -3   -0.20    0.80 
  -5  14   3    0.70    1.10 
  -5  14   3   -0.20    1.50 
   4 -14  -3    5.90    1.30 
  -4 -14   3    3.70    1.30 
   4 -14  -3    9.40    1.50 
  -4 -14   3    4.50    1.60 
   4 -14  -3    3.00    1.20 
  -4  14   3    5.10    1.30 
   4  14  -3    8.10    1.50 
   3 -14  -3    1.50    0.70 
   3 -14  -3    0.20    1.00 
  -3 -14   3    1.20    1.30 
  -3 -14   3    0.50    1.00 
   3 -14  -3   -0.60    0.60 
   3  14  -3    0.20    0.80 
  -3  14   3   -0.50    0.90 
   2 -14  -3    3.50    1.20 
   2 -14  -3    5.90    1.20 
  -2 -14   3    4.70    1.50 
  -2 -14   3    3.60    1.10 
   2  14  -3    4.90    1.10 
  -2  14   3    3.90    1.30 
   1 -14  -3    0.30    0.60 
  -1 -14   3    1.30    1.30 
   1 -14  -3    0.80    1.10 
  -1 -14   3   -0.50    0.80 
   1 -14  -3   -0.20    1.00 
   1  14  -3    1.20    1.00 
   1  14  -3    0.80    0.80 
  -1  14   3    0.50    0.70 
   0 -14   3   91.69    5.40 
   0 -14   3   85.89    4.70 
   0 -14  -3   92.39    6.00 
   0 -14  -3   97.69    5.70 
   0 -14   3   96.89    5.70 
   0  14   3   88.69    4.40 
   0  14  -3   96.79    4.50 
   1 -14   3    3.80    1.00 
   1 -14   3    2.20    1.40 
   1 -14   3    2.50    0.90 
  -1 -14  -3    2.60    1.30 
  -1 -14  -3    2.10    1.20 
   1  14   3    3.40    0.80 
  -1  14  -3    4.00    1.00 
   2 -14   3    0.70    0.90 
  -2 -14  -3    2.10    1.30 
  -2 -14  -3    1.30    1.20 
   2 -14   3    1.80    1.30 
   2 -14   3    1.00    0.90 
  -2  14  -3    0.70    0.90 
   2  14   3    2.70    0.70 
  -3 -14  -3   25.80    4.30 
   3 -14   3   28.30    3.20 
   3 -14   3   19.90    2.20 
  -3 -14  -3   29.00    3.70 
   3  14   3   24.00    1.80 
  -3  14  -3   28.20    3.20 
   4 -14   3    3.20    1.00 
  -4 -14  -3    2.90    1.60 
  -4 -14  -3    4.90    1.50 
   4 -14   3    2.00    1.10 
  -4  14  -3    3.60    1.30 
   4  14   3    3.20    0.80 
   5 -14   3   -1.00    0.90 
  -5 -14  -3   -0.80    1.50 
   5 -14   3    0.30    0.90 
  -5 -14  -3    1.90    1.50 
   5  14   3    0.30    0.70 
   6 -14   3    2.40    1.10 
  -6 -14  -3    3.90    1.70 
   6 -14   3    3.90    1.20 
  -6 -14  -3    2.50    1.90 
   6  14   3    2.80    0.90 
   7 -14   3   59.19    3.80 
  -7 -14  -3   69.29    7.00 
   7  14   3   56.29    5.10 
   7  14   3   60.59    3.60 
   8 -14   3   98.29    5.20 
  -8 -14  -3  105.39    8.50 
  -8  14  -3   97.39    5.50 
   8  14   3   82.89    6.50 
   8  14   3   92.39    5.00 
  -9 -14  -3   33.60    6.30 
   9 -14   3   27.70    2.80 
   9  14   3   19.80    4.20 
   9  14   3   28.10    2.60 
  -9  14  -3   26.00    3.10 
  10 -14   3    0.60    1.20 
 -10 -14  -3    5.60    2.80 
  10  14   3    2.60    1.20 
 -10  14  -3    0.10    1.50 
  10  14   3    1.10    1.50 
  12 -15  -3    3.90    1.60 
  12  15  -3   -0.70    1.20 
  11 -15  -3    4.10    1.60 
  11  15  -3    1.80    1.30 
 -10 -15   3   32.80    4.80 
  10 -15  -3   32.20    3.30 
  10  15  -3   33.50    3.00 
  -9 -15   3    1.10    1.80 
   9 -15  -3   -1.20    1.20 
  -9 -15   3    0.20    2.10 
   9  15  -3   -1.30    1.00 
  -9  15   3   -2.20    1.60 
  -8 -15   3    0.30    1.80 
   8 -15  -3    1.70    1.20 
  -8 -15   3    2.50    1.80 
  -8  15   3   -0.50    1.70 
   8  15  -3    1.80    1.10 
  -7 -15   3    2.10    1.70 
  -7 -15   3   11.10    4.30 
   7 -15  -3    0.10    1.00 
   7  15  -3    0.70    1.00 
  -6 -15   3   32.40    5.00 
  -6 -15   3   40.20    4.60 
   6 -15  -3   34.50    2.70 
  -6  15   3   29.00    4.50 
   6  15  -3   35.30    2.60 
  -5 -15   3    3.40    1.40 
   5 -15  -3    7.90    1.70 
  -5 -15   3   12.10    3.60 
  -5  15   3    2.40    1.40 
   5  15  -3    3.40    1.00 
  -4 -15   3   11.70    3.20 
   4 -15  -3   11.00    3.30 
   4 -15  -3   14.00    1.70 
  -4 -15   3    6.70    1.80 
   4  15  -3   11.00    1.70 
  -4  15   3   12.10    2.50 
   3 -15  -3    2.00    0.80 
  -3 -15   3    0.60    1.00 
   3 -15  -3    0.30    1.10 
  -3 -15   3    2.50    1.60 
  -3  15   3    0.50    1.00 
   3  15  -3    0.80    0.90 
  -2 -15   3   26.90    3.70 
   2 -15  -3   25.80    1.90 
  -2 -15   3   25.60    3.20 
   2 -15  -3   24.50    3.70 
  -2  15   3   24.90    2.00 
   2  15  -3   25.40    2.30 
  -2  15   3   27.80    3.30 
  -1 -15   3    2.80    1.00 
   1 -15  -3    3.20    1.30 
   1 -15  -3   10.40    2.90 
   1 -15  -3    7.30    1.20 
  -1 -15   3    5.20    1.70 
  -1  15   3    4.00    0.90 
   1  15  -3    3.50    1.10 
   0 -15  -3  142.49    7.30 
   0 -15  -3  127.89    7.60 
   0 -15   3  123.59    6.90 
   0 -15   3  126.19    7.20 
   0  15  -3  133.99    6.00 
   0  15   3  122.69    5.80 
  -1 -15  -3   23.90    3.60 
   1 -15   3   13.60    2.00 
  -1 -15  -3   12.40    3.70 
   1 -15   3   13.50    2.60 
   1 -15   3   14.20    3.30 
   1  15   3   10.70    1.40 
  -1  15  -3   14.90    1.80 
  -2 -15  -3   27.20    3.70 
  -2 -15  -3   22.30    4.20 
   2 -15   3   20.90    2.20 
   2 -15   3   25.20    3.40 
   2  15   3   21.60    1.80 
  -2  15  -3   21.90    2.20 
   3 -15   3    1.40    1.30 
  -3 -15  -3    2.00    1.40 
   3 -15   3    0.10    0.90 
  -3 -15  -3    0.30    1.40 
   3  15   3    1.30    0.70 
  -3  15  -3    0.40    1.00 
  -4 -15  -3   -0.30    1.50 
  -4 -15  -3    1.50    1.50 
   4 -15   3    0.20    0.90 
   4  15   3   -0.60    0.60 
  -4  15  -3    0.30    1.10 
  -5 -15  -3    2.00    1.90 
   5 -15   3    1.60    1.10 
   5  15   3    1.40    0.80 
  -5  15  -3    0.50    1.20 
  -6 -15  -3   66.19    7.00 
   6 -15   3   56.09    3.80 
  -6  15  -3   63.39    4.10 
   6  15   3   59.29    3.40 
   6  15   3   51.09    5.00 
   7 -15   3    5.50    1.50 
  -7 -15  -3    7.70    2.70 
   7  15   3    2.80    1.70 
   7  15   3    8.60    1.80 
  -7  15  -3    4.30    1.50 
  -8 -15  -3    4.80    2.60 
   8 -15   3    4.40    1.40 
   8  15   3    2.40    1.70 
  -8  15  -3    4.20    1.70 
   8  15   3    7.70    1.90 
   9 -15   3    5.30    1.50 
  -9  15  -3    5.00    1.80 
   9  15   3    6.80    1.40 
   9  15   3    4.60    1.90 
  10 -15   3   19.80    2.70 
  10  15   3   19.70    4.30 
  10  15   3   18.40    2.50 
 -10  15  -3   16.10    3.00 
 -11 -15  -3    6.90    3.30 
  11 -15   3    6.90    1.70 
  11  15   3    7.00    1.60 
 -11  15  -3    6.90    2.00 
  11  15   3    4.00    2.00 
 -10 -16   3   26.00    5.10 
  10 -16  -3   14.30    2.80 
  10  16  -3   17.10    2.60 
   9 -16  -3   30.00    3.40 
  -9 -16   3   44.40    5.60 
   9  16  -3   37.20    3.10 
  -9  16   3   21.60    5.70 
   8 -16  -3    0.20    1.30 
  -8 -16   3    1.10    2.10 
   8  16  -3   -0.40    1.10 
  -8  16   3   -2.50    1.60 
  -7 -16   3    4.40    2.10 
  -7 -16   3    4.10    2.10 
   7 -16  -3    6.60    1.50 
  -7  16   3    4.70    1.90 
   7  16  -3    6.60    1.40 
  -6 -16   3  111.69    7.30 
  -6 -16   3  136.39    7.90 
   6 -16  -3  114.49    5.90 
  -6  16   3  113.49    8.00 
   6  16  -3  112.49    5.90 
  -5 -16   3    1.40    1.60 
  -5 -16   3    0.80    1.40 
   5 -16  -3    1.00    0.90 
  -5  16   3    0.10    1.20 
   5  16  -3   -0.30    0.90 
  -4 -16   3    0.70    1.20 
  -4 -16   3    2.30    1.60 
   4 -16  -3    3.00    1.00 
   4 -16  -3   -0.20    1.20 
  -4  16   3    0.50    1.10 
   4  16  -3    1.00    0.90 
  -3 -16   3    4.90    1.80 
  -3 -16   3    2.10    1.20 
   3 -16  -3    2.60    1.30 
   3 -16  -3    7.70    1.50 
   3  16  -3    3.90    1.10 
  -3  16   3    3.50    1.40 
  -2 -16   3  139.99    7.70 
  -2 -16   3  136.79    7.90 
   2 -16  -3  134.49    8.00 
   2 -16  -3  134.79    6.30 
   2  16  -3  147.39    6.70 
  -2  16   3  136.79    7.70 
  -1 -16   3    4.70    1.70 
   1 -16  -3    1.10    1.20 
   1  16  -3    2.60    1.10 
  -1  16   3    2.50    1.30 
   0 -16  -3    6.00    1.70 
   0 -16   3   14.00    3.60 
   0  16  -3   10.10    1.90 
  -1 -16  -3   38.10    4.20 
   1 -16   3   26.00    2.50 
  -1 -16  -3   27.10    4.50 
   1 -16   3   33.30    3.90 
  -1  16  -3   27.80    2.40 
   2 -16   3    4.60    1.20 
   2 -16   3   10.90    3.20 
  -2 -16  -3    2.60    1.60 
  -2  16  -3    2.50    1.10 
   3 -16   3    0.10    1.00 
  -3 -16  -3    2.20    1.50 
   3 -16   3    2.10    1.30 
  -3 -16  -3    0.20    1.50 
  -3  16  -3    1.90    1.10 
   4 -16   3    0.20    1.00 
  -4 -16  -3    3.80    1.70 
  -4 -16  -3    2.50    2.00 
  -4  16  -3    0.60    1.10 
  -5 -16  -3    4.40    2.40 
   5 -16   3    5.70    1.40 
  -5  16  -3    4.90    1.60 
   5  16   3    4.60    1.80 
   6 -16   3   18.50    2.40 
  -6 -16  -3   14.70    5.80 
   6  16   3   16.60    2.90 
   6  16   3   10.80    2.30 
  -6  16  -3   17.70    2.70 
   7 -16   3   71.49    4.40 
  -7 -16  -3   72.89    7.90 
   7  16   3   56.79    5.60 
  -7  16  -3   76.19    4.70 
   9 -16   3    2.80    1.50 
  -9 -16  -3   19.40    6.50 
   9  16   3    2.40    1.80 
  -9  16  -3    3.00    1.70 
  10 -16   3    1.20    1.40 
 -10  16  -3    0.00    1.50 
  10 -17  -3    6.90    1.80 
  10  17  -3    4.30    1.50 
   9 -17  -3    1.90    1.50 
   9  17  -3    2.00    1.30 
  -8 -17   3   19.90    5.10 
   8 -17  -3   12.60    2.80 
   8  17  -3   16.20    2.50 
  -7 -17   3   17.30    4.90 
   7 -17  -3   14.90    2.60 
   7  17  -3   12.00    2.20 
  -6 -17   3   20.30    4.80 
  -6 -17   3   13.80    5.10 
   6 -17  -3   21.00    2.50 
  -6  17   3   14.90    4.40 
   6  17  -3   13.40    2.10 
   5 -17  -3    3.30    1.20 
  -5 -17   3    5.60    2.10 
  -5  17   3    1.70    1.50 
   5  17  -3    3.20    1.20 
  -4 -17   3   22.90    4.20 
   4 -17  -3   13.40    3.80 
   4 -17  -3   19.40    2.10 
   4  17  -3   13.50    2.00 
   3 -17  -3   14.80    1.80 
   3 -17  -3    9.90    3.90 
  -3 -17   3   14.80    3.90 
  -3  17   3    9.50    2.90 
   3  17  -3    9.90    1.90 
   2 -17  -3   26.10    4.50 
  -2 -17   3   34.60    4.50 
  -2  17   3   26.20    3.60 
   2  17  -3   25.20    2.40 
  -1 -17   3   18.80    4.00 
   1 -17  -3    9.80    2.10 
  -1  17   3   17.60    3.30 
   1  17  -3   15.80    2.10 
   0 -17   3   14.60    3.80 
   0 -17  -3    5.60    1.80 
   0  17   3    6.50    1.70 
   0  17  -3   12.50    2.00 
  -1 -17  -3   71.79    6.40 
   1 -17   3   66.49    4.20 
   1 -17   3   77.39    5.50 
   1  17   3   69.99    5.50 
  -2 -17  -3    3.30    1.80 
   2 -17   3    3.10    1.50 
   2 -17   3    3.00    1.20 
   2  17   3    1.60    1.60 
  -2  17  -3    3.40    1.20 
   3 -17   3    6.50    1.50 
  -3 -17  -3    4.70    2.10 
   3  17   3    3.00    1.70 
  -3  17  -3    5.50    1.40 
  -4 -17  -3   -1.60    1.90 
   4 -17   3    0.60    1.10 
  -4  17  -3    1.70    1.30 
   4  17   3    1.10    1.50 
   5 -17   3   45.70    3.50 
  -5 -17  -3   56.29    6.60 
   5  17   3   39.50    4.80 
  -5  17  -3   45.20    3.70 
   6 -17   3    0.90    1.20 
  -6 -17  -3    0.30    2.50 
   6  17   3    0.40    1.60 
  -6  17  -3    0.80    1.40 
   7 -17   3   25.80    2.90 
  -7  17  -3   21.90    3.10 
   7  17   3   17.60    4.40 
  -8 -17  -3   -0.10    2.80 
   8 -17   3    0.00    1.30 
   8  17   3   -0.80    1.60 
  -8  17  -3    1.50    1.60 
  -9 -18   3   30.60    5.60 
   9 -18  -3   21.90    3.20 
   9  18  -3   16.00    2.80 
   8 -18  -3   57.49    4.20 
  -8 -18   3   66.99    6.50 
   8  18  -3   55.79    4.00 
  -7 -18   3   16.00    4.70 
   7 -18  -3   11.70    2.60 
   7  18  -3    2.10    1.30 
  -6 -18   3    3.80    2.20 
   6 -18  -3    2.20    1.20 
  -6  18   3    0.10    1.60 
   6  18  -3   -0.70    1.10 
   5 -18  -3   23.10    2.50 
  -5 -18   3   30.60    4.80 
   5  18  -3   19.30    2.40 
  -5  18   3   22.20    4.70 
  -4 -18   3    3.70    2.10 
   4 -18  -3    1.50    1.00 
   4 -18  -3   -1.20    1.40 
   4  18  -3   -0.30    1.00 
  -3 -18   3   13.80    4.10 
   3 -18  -3    2.70    1.60 
   3  18  -3    4.70    1.30 
  -3  18   3    3.50    1.50 
  -2 -18   3   14.50    4.30 
   2 -18  -3    4.10    1.50 
  -2  18   3    2.00    1.50 
   2  18  -3    4.20    1.20 
   1 -18  -3    1.70    1.50 
  -1 -18   3    2.30    1.80 
   1  18  -3    2.10    1.20 
  -1  18   3    1.50    1.40 
   0 -18  -3    3.60    1.80 
   0 -18   3    4.50    1.80 
   0  18   3    0.30    1.50 
   0  18  -3    3.40    1.30 
   1 -18   3   17.70    4.10 
  -1 -18  -3    5.40    2.00 
  -1  18  -3    4.50    1.30 
   1  18   3    1.20    1.50 
   2 -18   3   -0.70    1.10 
   2 -18   3    3.60    1.60 
  -2 -18  -3    0.50    1.80 
   2  18   3   -0.40    1.50 
  -3 -18  -3    2.90    2.10 
   3 -18   3    0.60    1.20 
  -3  18  -3    0.80    1.20 
   3  18   3    0.90    1.60 
   4 -18   3    4.80    1.50 
  -4 -18  -3   15.20    5.50 
  -4  18  -3    4.90    1.60 
   4  18   3    4.70    1.90 
  -5 -18  -3   70.29    7.50 
   5 -18   3   50.89    3.90 
  -5  18  -3   57.19    4.20 
   5  18   3   52.99    5.40 
   6 -18   3   31.20    3.20 
   6  18   3   30.40    4.90 
  -6  18  -3   27.30    3.40 
   7 -18   3    7.90    1.80 
   7  18   3    5.40    2.10 
  -7  18  -3    4.40    1.90 
   8 -18   3   19.60    2.80 
  -8  18  -3   19.50    3.30 
   8  18   3   21.40    4.70 
  -7 -19   3   64.99    6.50 
   7 -19  -3   59.79    4.10 
  -7  19   3   39.80    6.60 
   7  19  -3   45.80    3.70 
   6 -19  -3   23.50    2.80 
  -6 -19   3   26.40    5.40 
   6  19  -3   14.30    2.50 
   5 -19  -3   24.70    2.70 
  -5 -19   3   32.50    5.40 
  -5  19   3   19.50    4.90 
   5  19  -3   16.50    2.50 
   4 -19  -3   -0.20    1.50 
   4  19  -3   -0.10    1.10 
  -3 -19   3    5.60    2.30 
   3 -19  -3    1.90    1.50 
  -3  19   3    1.60    2.40 
   3  19  -3    1.80    1.20 
  -2 -19   3   21.80    4.80 
   2 -19  -3   12.80    4.70 
  -2  19   3   12.60    3.50 
   2  19  -3   12.40    2.20 
  -1 -19   3   15.30    4.70 
   1 -19  -3    1.00    1.70 
  -1  19   3    2.10    1.60 
   1  19  -3    4.00    1.30 
   0 -19   3   29.50    4.90 
   0  19   3   12.20    3.70 
   0  19  -3   15.30    2.40 
   1 -19   3   18.50    4.20 
  -2 -19  -3   25.00    6.00 
   2  19   3   19.90    4.30 
  -2  19  -3   23.60    2.70 
   3 -19   3    0.50    1.30 
  -3 -19  -3   -1.70    2.10 
   3  19   3   -1.10    1.50 
   4 -19   3   15.60    2.70 
   4  19   3   13.00    4.00 
  -4  19  -3   20.50    2.80 
   5 -19   3    9.10    1.90 
  -5  19  -3    9.70    2.00 
   5  19   3    7.50    2.20 
   6 -19   3   13.70    2.80 
   6  19   3   16.90    4.40 
  -6  19  -3   14.20    3.00 
  -5  20   3   16.30    6.50 
   5  20  -3   12.10    2.40 
  -4  20   3   11.60    4.40 
   4  20  -3    4.30    1.50 
   3 -20  -3    2.60    1.90 
   3  20  -3    7.50    1.60 
   2 -20  -3   23.20    5.50 
   2  20  -3   26.80    2.70 
  -2  20   3   29.00    4.30 
   1 -20  -3    7.90    2.50 
   1  20  -3   13.60    2.30 
  -1  20   3   13.80    3.70 
   0 -20  -3    4.50    2.30 
   0  20   3    4.70    1.80 
   0  20  -3    7.00    1.60 
  -2  20  -3   -1.70    1.20 
   2  20   3   -0.50    1.60 
   3 -20   3   -1.20    1.30 
   3  20   3   -0.30    1.70 
   4 -20   3   11.60    2.50 
   4  20   3    9.80    2.40 
  -1  21   3    2.10    1.70 
 -16   0   4  184.28   10.50 
  16   0  -4  130.19    7.50 
  14   0  -4   63.09    3.80 
 -13   0   4   15.80    4.50 
  12   0  -4   18.90    1.90 
 -12   0   4   17.90    4.20 
  12   0  -4   17.70    1.50 
  11   0  -4    0.10    0.60 
  11   0  -4    0.30    0.70 
 -11   0   4   -0.10    1.20 
  10   0  -4    2.50    0.80 
  10   0  -4    1.70    0.60 
 -10   0   4    1.20    1.30 
  -9   0   4   -0.40    0.50 
  -9   0   4    2.10    1.30 
   9   0  -4    0.70    0.50 
   9   0  -4   -0.30    0.40 
   8   0  -4    1.90    0.50 
  -8   0   4    0.90    1.10 
  -8   0   4    1.00    0.60 
   8   0  -4    1.60    0.50 
   7   0  -4    0.30    0.40 
   7   0  -4    0.30    0.40 
  -7   0   4   -0.10    0.50 
  -7   0   4    0.40    1.00 
  -6   0   4 1058.59   44.60 
  -6   0   4 1105.69   43.90 
   6   0  -4 1066.49   43.70 
   6   0  -4 1092.09   43.80 
   5   0  -4    0.10    0.30 
  -5   0   4    0.60    0.70 
   5   0  -4   -0.10    0.30 
  -5   0   4   -0.20    0.40 
   4   0  -4   29.20    1.50 
   4   0  -4   30.50    1.50 
  -4   0   4   33.40    2.60 
  -4   0   4   29.80    1.80 
  -3   0   4    4.10    1.40 
   3   0  -4    0.50    0.30 
  -2   0   4 1123.89   44.20 
   2   0  -4 1036.10   43.60 
  -2   0   4 1089.89   43.80 
   2   0  -4 1076.49   43.60 
  -1   0   4   -0.10    0.30 
   1   0  -4    0.10    0.20 
   1   0  -4    0.60    0.20 
  -1   0   4   -0.10    0.20 
   0   0  -4 1646.64   71.09 
   0   0   4 1765.82   71.09 
   0   0  -4 1752.32   70.99 
   0   0   4 1869.11   71.79 
  -1   0  -4   -0.50    0.30 
   1   0   4   -0.30    0.20 
   1   0   4   -0.50    0.30 
  -1   0  -4   -0.70    0.30 
   2   0   4  261.27   10.60 
  -2   0  -4  255.17   10.40 
  -2   0  -4  246.68   10.60 
   2   0   4  245.28   10.40 
   3   0   4   -0.10    0.30 
   3   0   4    0.10    0.30 
  -3   0  -4   -0.30    0.30 
  -3   0  -4   -0.30    0.30 
  -4   0  -4  325.67   14.30 
   4   0   4  350.96   14.00 
  -4   0  -4  340.27   13.80 
   4   0   4  323.77   13.80 
  -5   0  -4    0.20    0.40 
   5   0   4   -0.10    0.40 
   5   0   4   -0.10    0.40 
  -5   0  -4   -0.40    0.40 
  -6   0  -4  141.29    7.20 
   6   0   4  153.78    6.70 
   6   0   4  154.18    6.60 
  -6   0  -4  149.88    6.50 
   7   0   4   -0.40    0.40 
  -7   0  -4   -0.20    0.40 
  -7   0  -4   -0.60    0.60 
   7   0   4    0.10    0.50 
   8   0   4   15.30    1.50 
   8   0   4   15.10    1.40 
  -8   0  -4    8.90    2.50 
  -8   0  -4   14.70    1.30 
  -9   0  -4   -0.60    0.90 
   9   0   4   -0.30    0.60 
  -9   0  -4   -0.40    0.60 
 -10   0  -4    2.40    1.20 
 -10   0  -4    3.50    0.80 
  10   0   4    3.70    1.00 
 -11   0  -4    1.20    1.40 
 -11   0  -4    0.70    0.60 
  11   0   4    0.10    0.80 
 -12   0  -4   28.80    4.90 
  12   0   4   19.90    2.20 
 -13   0  -4   26.90    5.40 
  14   0   4   35.30    3.10 
 -14   0  -4   43.10    6.30 
 -15   0  -4   15.30    6.10 
  15  -1  -4   33.60    2.90 
  15   1  -4   33.60    2.90 
  14  -1  -4   35.00    3.00 
  14  -1  -4   29.60    2.60 
  14   1  -4   29.50    2.60 
 -13   1   4   14.10    4.40 
  12  -1  -4    7.40    1.50 
  12  -1  -4    6.20    1.30 
 -12  -1   4   10.20    3.90 
  12   1  -4    6.80    1.50 
  12   1  -4    6.20    1.10 
 -12   1   4    5.30    1.70 
  11  -1  -4  112.49    5.00 
 -11  -1   4  105.89    7.00 
  11  -1  -4  110.09    5.30 
  11   1  -4  106.79    4.90 
  11   1  -4  110.39    5.30 
 -11   1   4  116.59    7.50 
 -10  -1   4   47.10    3.90 
  10  -1  -4   43.50    2.50 
  10  -1  -4   40.20    2.30 
 -10  -1   4   44.20    4.50 
 -10   1   4   48.90    5.10 
  10   1  -4   38.70    2.20 
  10   1  -4   43.00    2.50 
   9  -1  -4   18.90    1.40 
   9  -1  -4   21.70    1.50 
  -9  -1   4   16.80    3.40 
  -9  -1   4   18.70    1.90 
  -9   1   4   22.00    3.90 
   9   1  -4   19.80    1.50 
   9   1  -4   18.00    1.30 
   8  -1  -4  169.98    7.30 
   8  -1  -4  166.28    7.10 
  -8  -1   4  170.48    7.50 
  -8  -1   4  157.98    8.40 
  -8   1   4  178.48    7.20 
   8   1  -4  169.38    7.30 
  -8   1   4  163.48    8.70 
   8   1  -4  163.18    7.10 
  -7  -1   4 1867.61   71.49 
  -7  -1   4 1658.83   71.89 
   7  -1  -4 1735.23   70.99 
   7  -1  -4 1743.53   71.09 
  -7   1   4 1691.93   71.99 
  -7   1   4 1854.61   71.49 
   7   1  -4 1736.43   70.89 
   7   1  -4 1787.32   71.09 
  -6  -1   4  240.88   10.10 
   6  -1  -4  235.18    9.90 
  -6  -1   4  224.78   10.80 
   6  -1  -4  242.08    9.90 
   6   1  -4  232.68    9.80 
  -6   1   4  235.98   11.00 
   6   1  -4  241.78    9.90 
  -6   1   4  249.58   10.00 
   5  -1  -4   14.70    1.00 
   5  -1  -4   15.60    1.00 
  -5  -1   4   16.20    2.20 
  -5  -1   4   13.80    1.40 
   5   1  -4   14.80    1.00 
  -5   1   4   17.00    1.30 
   5   1  -4   15.70    1.00 
  -5   1   4   18.10    2.30 
  -4  -1   4  210.18    8.60 
   4  -1  -4  192.78    7.90 
   4  -1  -4  191.68    7.90 
  -4  -1   4  173.68    8.10 
   4   1  -4  184.28    7.90 
  -4   1   4  192.08    8.00 
  -4   1   4  186.08    8.50 
   4   1  -4  196.78    7.90 
  -3  -1   4 5319.87  235.18 
  -3  -1   4 6498.55  235.88 
   3  -1  -4 5678.23  234.48 
   3  -1  -4 5763.52  234.18 
  -3   1   4 6027.20  236.08 
  -3   1   4 5829.82  235.08 
   3   1  -4 5720.03  234.28 
   3   1  -4 5680.53  234.48 
   2  -1  -4 1771.82   72.49 
  -2  -1   4 1935.41   72.49 
  -2  -1   4 1783.52   72.39 
   2  -1  -4 1753.72   71.79 
   2  -1  -4 1734.43   72.09 
   2   1  -4 1613.94   71.79 
   2   1  -4 1852.01   71.99 
  -2   1   4 1792.92   72.19 
  -1  -1   4   11.90    0.70 
  -1  -1   4   11.70    1.00 
   1  -1  -4   11.20    0.70 
   1  -1  -4   11.40    1.00 
  -1   1   4   12.40    1.10 
   1   1  -4   10.00    0.70 
  -1   1   4   10.90    0.60 
   0  -1  -4  156.68    6.90 
   0  -1   4  161.78    6.60 
   0  -1  -4  152.78    6.60 
   0  -1   4  170.08    6.90 
   0   1   4  159.08    6.60 
   0   1   4  164.98    6.90 
  -1  -1  -4  173.58    7.60 
   1  -1   4  171.18    7.30 
   1  -1   4  180.08    7.50 
  -1  -1  -4  172.58    7.30 
   1   1   4  188.48    7.60 
  -1   1  -4  183.68    7.30 
   1   1   4  172.38    7.20 
  -1   1  -4  166.48    7.40 
  -2  -1  -4   99.69    4.20 
   2  -1   4   99.59    4.20 
  -2  -1  -4   91.29    4.50 
   2  -1   4  101.99    4.40 
  -2   1  -4   94.39    4.40 
   2   1   4   96.39    4.20 
  -2   1  -4   97.79    4.20 
   2   1   4  100.99    4.50 
  -3  -1  -4  476.45   19.10 
   3  -1   4  464.95   19.20 
   3  -1   4  494.95   19.30 
  -3  -1  -4  448.36   19.60 
  -3   1  -4  443.16   19.50 
   3   1   4  474.65   19.20 
  -3   1  -4  476.15   19.20 
   3   1   4  485.35   19.50 
   4  -1   4  589.54   24.80 
   4  -1   4  634.44   24.90 
  -4  -1  -4  602.64   24.70 
  -4  -1  -4  587.04   25.30 
  -4   1  -4  621.24   25.20 
   4   1   4  617.34   25.00 
  -4   1  -4  608.64   24.80 
   4   1   4  602.84   24.80 
   5  -1   4   37.40    2.00 
  -5  -1  -4   34.80    2.60 
  -5  -1  -4   35.80    1.80 
   5  -1   4   36.00    2.00 
  -5   1  -4   31.80    2.50 
  -5   1  -4   36.60    1.90 
   5   1   4   36.50    1.90 
   5   1   4   37.30    2.20 
   6  -1   4   15.50    1.20 
  -6  -1  -4   15.10    1.10 
  -6  -1  -4   13.10    2.00 
   6  -1   4   15.10    1.20 
   6   1   4   16.70    1.50 
  -6   1  -4   15.50    1.20 
   6   1   4   16.90    1.30 
  -6   1  -4   12.40    2.10 
   7  -1   4   15.90    1.30 
  -7  -1  -4   16.60    1.20 
  -7  -1  -4   12.70    2.20 
   7  -1   4   15.20    1.30 
   7   1   4   15.30    1.30 
  -7   1  -4   15.70    1.30 
  -7   1  -4   10.00    2.30 
   7   1   4   16.20    1.60 
   8  -1   4  136.79    6.20 
  -8  -1  -4  129.19    7.20 
  -8  -1  -4  134.29    6.00 
  -8   1  -4  138.99    6.10 
   8   1   4  137.19    6.20 
  -8   1  -4  127.49    7.20 
   8   1   4  143.19    6.30 
  -9  -1  -4   85.79    5.80 
  -9  -1  -4   93.09    4.30 
   9  -1   4   91.79    4.50 
   9   1   4   96.29    4.60 
  -9   1  -4   90.99    4.40 
  -9   1  -4   88.49    5.90 
  10  -1   4   -0.20    0.70 
 -10  -1  -4   -0.50    0.60 
 -10  -1  -4   -0.30    1.10 
 -10   1  -4    0.00    0.60 
 -10   1  -4    1.10    1.10 
  10   1   4    0.00    0.70 
  11  -1   4   33.00    2.50 
 -11  -1  -4   34.50    2.60 
 -11  -1  -4   32.20    4.50 
  11   1   4   31.70    2.50 
 -11   1  -4   40.40    4.60 
 -11   1  -4   29.80    2.30 
  12  -1   4    1.70    1.00 
 -12  -1  -4    2.50    1.80 
 -12   1  -4    2.10    0.90 
  12   1   4    1.80    1.00 
 -13  -1  -4   13.30    4.90 
 -13   1  -4   19.50    4.90 
  14  -1   4   13.90    2.30 
 -14  -1  -4   27.30    5.60 
  14   1   4   15.70    2.30 
  15  -1   4   18.80    2.60 
  15   1   4   21.70    2.60 
  17  -2  -4   56.69    3.90 
  17   2  -4   53.69    4.00 
 -16  -2   4   73.09    7.60 
 -16   2   4   96.69    8.40 
 -14   2   4   13.10    5.00 
  13  -2  -4   -0.30    0.80 
  13  -2  -4   -0.40    0.70 
  13   2  -4    1.20    0.90 
 -13   2   4   -0.30    1.40 
  12  -2  -4    6.90    1.30 
  12  -2  -4    4.90    1.00 
  12   2  -4    4.80    1.00 
 -12   2   4    3.50    1.60 
 -11  -2   4   80.79    6.00 
  11  -2  -4   84.99    4.10 
  11  -2  -4   89.99    4.30 
  11   2  -4   83.19    3.90 
 -11   2   4   84.79    6.70 
  11   2  -4   85.69    4.30 
  10  -2  -4   53.99    2.80 
 -10  -2   4   49.20    3.10 
  10  -2  -4   48.10    2.70 
 -10  -2   4   42.70    4.50 
 -10   2   4   53.59    5.30 
  10   2  -4   50.99    2.80 
  10   2  -4   50.49    2.50 
   9  -2  -4  105.89    4.70 
  -9  -2   4   93.99    6.10 
  -9  -2   4   99.19    5.10 
   9  -2  -4  109.89    4.80 
  -9   2   4  102.49    6.70 
   9   2  -4   99.79    4.50 
   9   2  -4  110.29    4.90 
  -8  -2   4   40.50    3.70 
  -8  -2   4   41.70    2.80 
   8  -2  -4   46.50    2.40 
   8  -2  -4   45.10    2.30 
  -8   2   4   45.90    4.40 
   8   2  -4   44.40    2.40 
   8   2  -4   41.60    2.10 
  -7  -2   4   61.99    4.30 
  -7  -2   4   68.99    3.60 
   7  -2  -4   65.69    3.10 
   7  -2  -4   68.79    3.20 
   7   2  -4   65.49    3.00 
  -7   2   4   65.79    4.90 
   7   2  -4   66.89    3.20 
  -7   2   4   70.09    3.10 
  -6  -2   4    8.50    1.40 
   6  -2  -4    8.00    0.80 
  -6  -2   4    6.60    2.20 
   6  -2  -4    7.60    0.90 
  -6   2   4    9.10    1.00 
   6   2  -4    7.90    0.70 
   6   2  -4    8.80    0.90 
  -6   2   4    8.40    2.70 
  -5  -2   4  117.49    5.40 
   5  -2  -4  116.39    5.10 
   5  -2  -4  112.09    5.10 
  -5  -2   4  128.49    5.90 
   5   2  -4  115.09    5.10 
  -5   2   4  124.79    6.00 
   5   2  -4  119.29    5.00 
  -5   2   4  120.59    5.20 
   4  -2  -4  251.17   10.90 
   4  -2  -4  261.47   10.90 
  -4  -2   4  282.87   11.50 
  -4  -2   4  263.27   11.20 
   4   2  -4  263.07   10.90 
  -4   2   4  266.77   11.00 
   4   2  -4  264.17   10.80 
   3  -2  -4   90.09    3.70 
   3  -2  -4   84.99    3.80 
  -3  -2   4   98.59    4.30 
   3   2  -4   84.69    3.80 
  -3   2   4   84.49    4.30 
  -3   2   4   92.69    4.00 
   3   2  -4   84.69    3.70 
  -2  -2   4 1121.59   41.90 
   2  -2  -4 1114.19   41.70 
  -2  -2   4 1024.30   42.10 
   2  -2  -4  962.70   41.80 
   2  -2  -4  998.20   42.10 
  -2   2   4 1083.69   42.00 
   2   2  -4  945.01   41.70 
   2   2  -4 1036.70   41.80 
   1  -2  -4   49.80    2.70 
   1  -2  -4   51.79    2.40 
  -1  -2   4   54.39    2.40 
  -1  -2   4   58.39    2.80 
   1   2  -4   53.39    2.40 
  -1   2   4   56.39    2.70 
   0  -2  -4 5842.32  210.58 
   0  -2  -4 4881.91  211.58 
   0  -2   4 5332.17  210.68 
   0  -2   4 5210.98  211.68 
   0   2   4 5584.54  211.98 
   0   2   4 4768.42  212.38 
   0   2  -4 4920.21  210.48 
  -1  -2  -4  379.56   14.90 
   1  -2   4  353.86   15.10 
  -1  -2  -4  353.26   15.30 
   1  -2   4  368.06   15.00 
   1   2   4  371.46   15.30 
   1   2   4  377.46   14.90 
  -1   2  -4  364.76   15.00 
  -2  -2  -4  533.15   21.50 
   2  -2   4  517.25   21.60 
   2  -2   4  532.35   21.60 
  -2  -2  -4  496.95   21.90 
   2   2   4  541.95   21.50 
  -2   2  -4  562.34   21.70 
   2   2   4  534.05   21.80 
  -2   2  -4  517.95   21.60 
  -3  -2  -4  165.88    6.70 
   3  -2   4  161.88    6.80 
  -3  -2  -4  147.99    7.20 
   3  -2   4  160.88    6.90 
  -3   2  -4  164.18    7.10 
  -3   2  -4  161.58    6.80 
   3   2   4  158.68    6.80 
   3   2   4  165.48    7.10 
   4  -2   4   46.60    2.30 
  -4  -2  -4   48.40    2.20 
   4  -2   4   45.30    2.30 
  -4  -2  -4   42.10    2.90 
   4   2   4   45.10    2.30 
  -4   2  -4   44.20    2.80 
  -4   2  -4   48.30    2.30 
   4   2   4   49.50    2.70 
  -5  -2  -4  107.29    4.60 
   5  -2   4  105.89    4.80 
   5  -2   4  105.49    4.70 
  -5  -2  -4  103.79    5.50 
  -5   2  -4  104.89    5.30 
  -5   2  -4  105.09    4.70 
   5   2   4  106.19    4.70 
   5   2   4  111.19    5.10 
  -6  -2  -4   34.70    1.80 
  -6  -2  -4   31.70    2.80 
   6  -2   4   33.60    1.90 
   6  -2   4   33.70    2.00 
  -6   2  -4   31.00    2.80 
  -6   2  -4   33.00    1.90 
   6   2   4   36.40    2.30 
   6   2   4   35.10    1.90 
  -7  -2  -4   13.90    1.10 
   7  -2   4   14.90    1.30 
   7  -2   4   14.40    1.10 
  -7  -2  -4   12.80    2.30 
   7   2   4   14.80    1.70 
  -7   2  -4   10.10    2.40 
   7   2   4   13.30    1.30 
  -7   2  -4   13.70    1.30 
  -8  -2  -4   -0.40    0.80 
  -8  -2  -4    0.90    0.50 
   8  -2   4    0.20    0.60 
   8   2   4   -0.10    0.50 
   8   2   4    0.50    0.60 
  -8   2  -4   -1.10    0.80 
  -8   2  -4   -0.30    0.50 
  -9  -2  -4   81.59    5.60 
  -9  -2  -4   83.09    4.00 
   9  -2   4   84.29    4.30 
  -9   2  -4   82.89    5.80 
  -9   2  -4   84.69    4.20 
   9   2   4   93.69    4.60 
   9   2   4   85.09    4.30 
 -10  -2  -4   10.60    1.40 
  10  -2   4   12.50    1.60 
 -10  -2  -4   10.80    3.50 
  10   2   4   12.00    1.60 
 -10   2  -4    9.90    1.50 
 -10   2  -4   15.40    3.60 
 -11  -2  -4   29.00    4.20 
  11  -2   4   20.20    2.10 
 -11   2  -4   22.70    2.00 
  11   2   4   23.90    2.20 
  12  -2   4   12.20    1.90 
 -12  -2  -4   19.40    4.60 
  12   2   4   12.30    1.80 
 -12   2  -4   11.30    1.70 
  13  -2   4   36.90    2.90 
  13   2   4   40.60    3.00 
 -13   2  -4   34.50    2.70 
  14  -2   4   23.80    2.60 
  14   2   4   26.50    2.70 
 -17  -3   4   43.40    6.50 
  16  -3  -4   19.40    2.60 
  16   3  -4   27.10    2.80 
  14  -3  -4   53.19    3.20 
  14  -3  -4   51.39    3.40 
 -14  -3   4   62.29    6.50 
  14   3  -4   53.99    3.60 
 -14   3   4   53.89    6.10 
  13  -3  -4    3.30    1.00 
  13  -3  -4    3.00    0.90 
  13   3  -4    3.40    1.10 
 -13   3   4    2.00    1.70 
  12  -3  -4   20.60    1.80 
  12  -3  -4   18.00    1.90 
 -12   3   4   28.00    4.90 
  12   3  -4   18.80    2.00 
  11  -3  -4   24.20    1.90 
  11  -3  -4   22.50    1.80 
 -11  -3   4   21.70    3.90 
  11   3  -4   21.10    1.90 
 -11   3   4   19.70    4.60 
 -10  -3   4   25.80    3.70 
 -10  -3   4   27.40    2.50 
  10  -3  -4   32.40    2.10 
  10  -3  -4   29.50    2.00 
 -10   3   4   34.50    4.80 
  10   3  -4   31.10    2.10 
  10   3  -4   28.80    1.60 
  -9  -3   4  141.19    7.20 
  -9  -3   4  120.09    6.10 
   9  -3  -4  129.99    5.80 
   9  -3  -4  122.89    5.70 
   9   3  -4  120.79    5.40 
   9   3  -4  129.19    5.80 
  -9   3   4  130.29    7.80 
  -8  -3   4   66.79    4.60 
   8  -3  -4   74.59    3.50 
  -8  -3   4   73.69    4.00 
   8  -3  -4   72.19    3.40 
   8   3  -4   67.19    3.10 
   8   3  -4   71.09    3.50 
  -8   3   4   79.19    5.70 
   7  -3  -4  225.58    9.40 
  -7  -3   4  232.48    9.90 
   7  -3  -4  221.08    9.40 
  -7  -3   4  218.88   10.30 
   7   3  -4  213.98    9.20 
   7   3  -4  227.18    9.50 
  -7   3   4  227.58   10.90 
  -6  -3   4    4.90    1.50 
  -6  -3   4    3.30    0.90 
   6  -3  -4    6.20    0.90 
   6  -3  -4    6.60    0.70 
   6   3  -4    5.30    0.80 
  -6   3   4    5.80    2.30 
   6   3  -4    5.60    0.60 
  -6   3   4    4.90    0.90 
  -5  -3   4  414.96   17.10 
   5  -3  -4  376.76   16.40 
  -5  -3   4  400.26   16.80 
   5  -3  -4  401.56   16.40 
  -5   3   4  405.56   16.40 
   5   3  -4  394.46   16.40 
  -5   3   4  394.76   17.20 
   5   3  -4  417.46   16.30 
  -4  -3   4  106.09    5.00 
  -4  -3   4  107.89    5.10 
   4  -3  -4   99.99    4.60 
   4  -3  -4  107.09    4.50 
   4   3  -4  103.39    4.40 
  -4   3   4  112.99    5.30 
   4   3  -4  101.09    4.60 
  -4   3   4  108.99    4.70 
   3  -3  -4    5.80    0.50 
   3  -3  -4    5.60    0.70 
  -3  -3   4    3.20    1.10 
  -3  -3   4    5.50    1.30 
   3  -3  -4    7.70    1.20 
   3   3  -4    5.30    0.50 
   3   3  -4    5.20    0.60 
  -3   3   4    6.40    0.90 
  -2  -3   4  917.11   35.40 
   2  -3  -4  928.31   35.70 
   2  -3  -4  826.32   35.30 
  -2  -3   4  796.42   35.50 
   2   3  -4  892.11   35.20 
   2   3  -4  842.02   35.30 
  -2   3   4  908.51   35.50 
  -1  -3   4  311.67   12.50 
   1  -3  -4  294.27   12.10 
   1  -3  -4  282.57   12.50 
  -1  -3   4  290.47   12.20 
  -1   3   4  304.67   12.50 
   1   3  -4  296.17   12.10 
   0  -3   4 1050.69   47.30 
   0  -3   4 1192.08   47.10 
   0  -3  -4 1133.69   47.40 
   0   3  -4 1134.39   47.10 
   0   3   4 1219.38   47.10 
   0   3   4 1271.37   47.40 
   1  -3   4   10.80    1.20 
   1  -3   4    8.00    0.70 
  -1  -3  -4   10.60    0.70 
  -1  -3  -4    7.50    1.20 
   1   3   4    8.90    1.10 
   1   3   4    9.00    0.60 
  -1   3  -4    7.90    0.80 
  -2  -3  -4  289.67   11.00 
   2  -3   4  258.17   11.10 
   2  -3   4  277.27   11.20 
  -2  -3  -4  251.47   11.50 
  -2   3  -4  276.67   11.30 
   2   3   4  273.97   11.00 
   2   3   4  261.67   11.40 
  -2   3  -4  254.87   11.10 
   3  -3   4  170.28    7.50 
  -3  -3  -4  168.88    8.10 
  -3  -3  -4  186.08    7.40 
   3  -3   4  176.78    7.60 
  -3   3  -4  168.48    7.50 
  -3   3  -4  198.28    7.90 
   3   3   4  177.28    7.40 
   3   3   4  175.28    7.90 
  -4  -3  -4   28.70    2.40 
   4  -3   4   30.80    1.80 
  -4  -3  -4   31.60    1.50 
   4  -3   4   29.00    1.70 
   4   3   4   31.60    2.20 
   4   3   4   31.80    1.70 
  -4   3  -4   29.90    1.80 
  -4   3  -4   33.60    2.50 
  -5  -3  -4   10.00    0.80 
   5  -3   4    9.10    1.00 
  -5  -3  -4    7.90    1.80 
   5  -3   4    9.70    1.00 
   5   3   4    8.20    1.40 
   5   3   4    9.30    0.90 
  -5   3  -4   10.90    2.00 
  -5   3  -4   10.30    1.00 
   6  -3   4  107.79    4.90 
  -6  -3  -4   97.79    5.70 
  -6  -3  -4  105.69    4.60 
   6  -3   4  108.29    4.70 
   6   3   4  107.99    4.80 
   6   3   4  111.09    5.30 
  -6   3  -4  110.89    4.90 
  -6   3  -4  101.79    5.60 
  -7  -3  -4    3.20    0.70 
   7  -3   4    3.80    0.80 
  -7  -3  -4    1.90    0.80 
   7   3   4    3.10    0.70 
  -7   3  -4    2.60    0.70 
   7   3   4    2.20    0.70 
  -7   3  -4    1.70    0.90 
  -8  -3  -4   23.40    1.50 
   8  -3   4   23.20    1.80 
  -8  -3  -4   18.80    2.90 
   8   3   4   23.30    1.80 
   8   3   4   25.10    2.20 
  -8   3  -4   24.50    1.80 
  -8   3  -4   16.00    3.20 
  -9  -3  -4   70.69    5.10 
   9  -3   4   64.09    3.60 
  -9  -3  -4   68.39    3.40 
   9   3   4   65.29    3.60 
  -9   3  -4   70.49    3.70 
   9   3   4   71.29    4.10 
  -9   3  -4   74.59    5.40 
  10  -3   4    0.90    0.80 
 -10  -3  -4    0.50    1.10 
 -10   3  -4    1.60    1.20 
  10   3   4    0.50    0.80 
 -10   3  -4    1.10    0.80 
 -11  -3  -4   14.20    3.90 
  11  -3   4    8.00    1.60 
  11   3   4    6.60    1.20 
 -11   3  -4    8.90    1.60 
  12  -3   4   13.50    2.00 
 -12  -3  -4   21.50    4.80 
 -12   3  -4   15.40    1.90 
  12   3   4   13.90    2.00 
 -14  -3  -4   13.80    5.10 
  15  -3   4   48.90    3.70 
  15   3   4   51.09    3.80 
 -17  -4   4   32.80    6.90 
  16  -4  -4    9.40    2.20 
  16  -4  -4   18.20    2.20 
  16   4  -4   11.40    2.50 
  15  -4  -4   39.60    3.20 
 -15  -4   4   49.60    6.80 
  15  -4  -4   42.40    3.10 
  15   4  -4   40.20    3.30 
 -15   4   4   58.39    6.80 
  14  -4  -4    9.40    1.90 
 -14  -4   4   19.90    5.00 
  14  -4  -4   13.00    1.90 
  14   4  -4   15.10    2.10 
  13  -4  -4    1.40    0.90 
 -13  -4   4    2.90    1.80 
  13  -4  -4   -0.10    0.80 
 -13   4   4   -0.60    1.60 
  13   4  -4    0.50    0.90 
  12  -4  -4    0.80    0.80 
 -12  -4   4    2.90    1.50 
  12  -4  -4    0.30    0.80 
  12   4  -4    0.30    0.80 
 -12   4   4    1.80    1.60 
 -11  -4   4    0.90    0.80 
  11  -4  -4    0.50    0.80 
 -11   4   4    1.30    1.50 
  10  -4  -4   62.49    3.40 
 -10  -4   4   70.09    5.20 
  10  -4  -4   59.69    3.30 
 -10  -4   4   58.19    3.90 
 -10   4   4   73.79    6.40 
  10   4  -4   65.49    3.50 
   9  -4  -4    2.40    0.80 
  -9  -4   4    1.80    0.90 
   9  -4  -4    3.00    0.70 
   9   4  -4    3.10    0.80 
   9   4  -4    2.90    0.60 
  -8  -4   4   21.80    2.40 
   8  -4  -4   24.00    1.70 
   8  -4  -4   26.60    1.60 
   8   4  -4   23.60    1.60 
   8   4  -4   23.00    1.20 
   7  -4  -4    0.60    0.50 
  -7  -4   4    0.90    0.70 
   7  -4  -4    1.70    0.50 
  -7  -4   4    0.70    0.80 
  -7   4   4    1.60    1.10 
   7   4  -4    1.10    0.50 
   7   4  -4    2.10    0.30 
   6  -4  -4   69.59    3.30 
  -6  -4   4   68.89    3.90 
  -6  -4   4   72.79    4.10 
   6  -4  -4   69.89    3.30 
   6   4  -4   70.09    3.00 
   6   4  -4   71.19    3.30 
  -6   4   4   73.79    4.50 
  -6   4   4   72.59    3.20 
  -5  -4   4    5.60    1.60 
   5  -4  -4    6.00    0.70 
   5  -4  -4    5.40    0.80 
  -5  -4   4    7.00    1.70 
  -5   4   4    7.00    0.90 
   5   4  -4    6.60    0.60 
  -5   4   4    7.40    1.80 
   5   4  -4    5.80    0.80 
  -4  -4   4   43.00    2.80 
   4  -4  -4   49.80    2.20 
  -4  -4   4   51.59    2.90 
   4  -4  -4   47.50    2.30 
   4   4  -4   48.20    2.10 
  -4   4   4   52.19    3.10 
   4   4  -4   46.80    2.30 
  -4   4   4   50.89    2.50 
   3  -4  -4  808.32   35.00 
  -3  -4   4  922.41   35.30 
   3  -4  -4  881.71   35.50 
   3  -4  -4  884.41   34.90 
  -3  -4   4  761.42   35.30 
   3   4  -4  821.82   35.00 
   3   4  -4  940.81   34.90 
  -3   4   4  891.11   35.20 
   2  -4  -4    0.50    0.40 
   2  -4  -4    0.30    0.20 
  -2  -4   4    0.20    0.30 
  -2  -4   4    0.50    0.60 
   2  -4  -4    0.50    0.40 
  -2   4   4    0.30    0.40 
   2   4  -4    0.10    0.30 
   2   4  -4    0.10    0.30 
  -1  -4   4    5.70    0.70 
   1  -4  -4    6.60    0.70 
  -1  -4   4    4.70    0.70 
   1  -4  -4    5.80    1.10 
  -1  -4   4    7.40    1.30 
  -1   4   4    6.20    1.00 
   1   4  -4    5.80    0.60 
   0  -4   4   69.19    3.20 
   0  -4  -4   71.89    3.70 
   0  -4  -4   80.79    3.20 
   0  -4   4   68.19    3.60 
   0   4   4   73.89    3.60 
   0   4  -4   72.29    3.20 
   0   4   4   69.89    3.00 
  -1  -4  -4   41.50    2.70 
  -1  -4  -4   52.39    2.10 
   1  -4   4   48.20    2.30 
   1  -4   4   44.90    2.60 
  -1   4  -4   42.20    2.20 
   1   4   4   50.89    2.70 
  -1   4  -4   48.20    2.30 
   1   4   4   48.40    2.10 
  -2  -4  -4  165.68    6.20 
  -2  -4  -4  140.19    6.90 
   2  -4   4  144.99    6.40 
   2  -4   4  154.98    6.60 
   2   4   4  154.18    6.30 
   2   4   4  148.19    6.80 
  -2   4  -4  136.29    6.40 
  -2   4  -4  154.68    6.60 
  -3  -4  -4   27.40    2.40 
   3  -4   4   32.80    2.00 
   3  -4   4   30.50    1.70 
  -3  -4  -4   32.60    1.50 
  -3   4  -4   29.20    1.70 
   3   4   4   31.60    1.60 
  -3   4  -4   35.10    2.40 
   3   4   4   31.30    2.20 
  -4  -4  -4   33.50    2.70 
   4  -4   4   33.90    1.90 
  -4  -4  -4   37.30    1.70 
   4  -4   4   35.00    2.10 
   4   4   4   35.80    2.40 
  -4   4  -4   32.70    2.00 
  -4   4  -4   40.70    2.80 
   4   4   4   33.90    1.80 
  -5  -4  -4   31.60    1.60 
   5  -4   4   30.00    1.80 
  -5  -4  -4   28.50    2.60 
   5  -4   4   28.80    1.90 
  -5   4  -4   31.40    1.90 
   5   4   4   31.50    2.40 
   5   4   4   32.30    1.80 
  -5   4  -4   33.80    2.90 
   6  -4   4    2.50    0.60 
  -6  -4  -4    2.00    0.80 
  -6  -4  -4    2.60    0.50 
   6  -4   4    2.30    0.60 
  -6   4  -4    2.30    0.70 
  -6   4  -4    2.60    1.00 
   6   4   4    2.10    0.70 
   6   4   4    3.40    0.60 
  -7  -4  -4   59.19    2.70 
   7  -4   4   57.89    3.10 
  -7  -4  -4   56.59    4.20 
  -7   4  -4   59.09    3.10 
  -7   4  -4   56.79    4.30 
   7   4   4   59.79    3.60 
   7   4   4   60.39    3.10 
  -8  -4  -4  243.58    9.80 
  -8  -4  -4  228.58   11.30 
   8  -4   4  230.88   10.10 
   8   4   4  240.68   10.60 
  -8   4  -4  228.28   10.10 
  -8   4  -4  220.58   11.10 
   8   4   4  233.08   10.10 
   9  -4   4    1.10    0.80 
  -9  -4  -4    0.20    1.00 
  -9   4  -4    1.20    0.80 
  -9   4  -4    0.70    1.10 
   9   4   4    1.00    0.80 
   9   4   4    2.10    0.90 
  10  -4   4   10.50    1.60 
 -10  -4  -4   14.40    3.80 
  10   4   4   11.30    1.60 
 -10   4  -4   11.80    1.70 
 -15  -4  -4   26.50    6.50 
  17  -5  -4    2.20    1.40 
  17   5  -4    1.10    1.40 
  16  -5  -4   14.50    2.30 
  16  -5  -4   10.70    2.30 
  16   5  -4   10.60    2.50 
  15  -5  -4   15.60    2.20 
 -15  -5   4   21.30    6.10 
  15  -5  -4   14.20    2.30 
 -15   5   4   15.50    5.30 
  15   5  -4   12.40    2.30 
  14  -5  -4    3.30    1.10 
  14  -5  -4    1.10    1.00 
  14   5  -4    4.20    1.20 
 -14   5   4    5.20    2.00 
 -13  -5   4   22.90    4.70 
  13  -5  -4   19.60    2.10 
  13  -5  -4   15.10    1.90 
 -13   5   4   15.00    5.00 
  13   5  -4   17.30    2.10 
 -12  -5   4    4.00    1.70 
  12  -5  -4    1.90    1.00 
  12  -5  -4    3.10    1.00 
 -12   5   4    0.80    1.60 
  12   5  -4    2.20    1.00 
 -10  -5   4   48.90    3.50 
  10  -5  -4   46.80    2.80 
  10  -5  -4   46.20    2.70 
  10   5  -4   45.60    2.80 
   9  -5  -4  245.58   10.30 
   9  -5  -4  247.28   10.30 
  -9  -5   4  240.58   10.80 
  -9  -5   4  229.78   11.50 
  -9   5   4  235.48   12.40 
   9   5  -4  236.88   10.30 
  -8  -5   4    1.90    0.90 
   8  -5  -4    2.90    0.70 
  -8  -5   4    3.00    1.00 
   8  -5  -4    5.60    0.90 
   8   5  -4    4.60    1.00 
  -8   5   4    8.70    3.50 
  -7  -5   4   10.90    2.20 
  -7  -5   4   17.60    2.40 
   7  -5  -4   13.80    1.30 
   7  -5  -4   16.30    1.20 
  -7   5   4   20.60    3.20 
   7   5  -4   15.60    1.30 
  -6  -5   4  136.79    6.90 
  -6  -5   4  139.89    6.80 
   6  -5  -4  143.89    6.10 
   6  -5  -4  137.69    6.20 
  -6   5   4  151.18    6.10 
  -6   5   4  142.79    7.30 
   6   5  -4  141.19    6.20 
  -5  -5   4  231.98   10.20 
   5  -5  -4  221.08    9.60 
  -5  -5   4  218.78   10.10 
   5  -5  -4  233.68    9.50 
  -5   5   4  234.88   10.50 
   5   5  -4  223.78    9.60 
  -5   5   4  235.38    9.70 
   4  -5  -4   14.50    1.20 
  -4  -5   4   15.80    1.80 
  -4  -5   4   15.10    2.00 
   4  -5  -4   17.60    1.00 
   4   5  -4   18.80    0.90 
  -4   5   4   17.20    1.40 
  -4   5   4   17.60    2.10 
   4   5  -4   16.10    1.10 
   3  -5  -4  301.67   13.30 
   3  -5  -4  331.37   13.20 
  -3  -5   4  344.37   13.90 
   3  -5  -4  345.07   14.00 
  -3  -5   4  317.47   13.70 
  -3   5   4  320.07   13.60 
   3   5  -4  334.17   13.20 
   3   5  -4  297.77   13.30 
   2  -5  -4  739.43   29.70 
   2  -5  -4  743.53   30.30 
  -2  -5   4  704.73   30.20 
   2  -5  -4  764.62   29.80 
  -2  -5   4  779.62   30.00 
  -2   5   4  713.03   30.10 
   2   5  -4  666.23   29.80 
   2   5  -4  766.22   29.70 
  -1  -5   4  444.36   18.80 
  -1  -5   4  434.86   19.00 
   1  -5  -4  457.75   19.20 
  -1  -5   4  451.25   18.70 
   1  -5  -4  451.45   18.60 
   1   5  -4  482.35   18.60 
  -1   5   4  481.85   19.10 
   0  -5   4   46.20    2.70 
   0  -5  -4   47.40    2.00 
   0  -5  -4   38.30    2.60 
   0  -5   4   44.50    2.10 
   0  -5   4   40.60    2.10 
   0   5   4   44.70    2.60 
   0   5   4   42.10    1.90 
   0   5  -4   43.80    2.10 
   1  -5   4  856.51   36.70 
  -1  -5  -4  944.91   36.40 
  -1  -5  -4  897.71   37.10 
   1  -5   4  876.21   36.60 
   1   5   4  956.80   37.00 
  -1   5  -4  817.62   36.50 
   1   5   4  932.61   36.40 
  -1   5  -4  924.61   36.60 
   2  -5   4   -0.20    0.60 
  -2  -5  -4    0.70    0.30 
   2  -5   4    0.20    0.40 
  -2  -5  -4    0.40    0.50 
  -2   5  -4    0.20    0.40 
   2   5   4   -0.30    0.50 
  -2   5  -4   -0.30    0.40 
   2   5   4    0.50    0.30 
   3  -5   4    1.50    0.50 
  -3  -5  -4    2.40    0.50 
  -3  -5  -4    1.20    0.60 
   3  -5   4    1.60    0.60 
   3   5   4    1.60    0.40 
  -3   5  -4    1.90    0.50 
  -3   5  -4    1.00    0.70 
   3   5   4    1.70    0.70 
  -4  -5  -4   76.79    4.70 
  -4  -5  -4   83.59    3.60 
   4  -5   4   85.49    3.90 
   4  -5   4   86.69    4.10 
  -4   5  -4   83.69    4.00 
   4   5   4   87.09    3.80 
   4   5   4   85.39    4.50 
  -4   5  -4   87.09    4.60 
  -5  -5  -4  145.69    6.30 
   5  -5   4  161.18    6.60 
  -5  -5  -4  139.79    7.40 
   5  -5   4  152.28    6.70 
   5   5   4  150.88    7.20 
  -5   5  -4  163.78    7.40 
  -5   5  -4  146.09    6.70 
   5   5   4  145.69    6.50 
  -6  -5  -4    5.30    2.00 
   6  -5   4    6.60    1.40 
  -6  -5  -4    5.60    0.70 
   6  -5   4    5.10    1.00 
  -6   5  -4    9.10    2.70 
   6   5   4    5.90    1.70 
   6   5   4    5.60    0.90 
  -6   5  -4    5.30    1.10 
   7  -5   4  161.38    7.00 
  -7  -5  -4  145.99    8.00 
   7   5   4  155.98    6.90 
  -7   5  -4  151.98    8.20 
  -7   5  -4  159.68    7.00 
   7   5   4  160.18    7.60 
  -8  -5  -4    4.00    1.20 
   8  -5   4    5.80    1.20 
   8   5   4    5.30    1.10 
   8   5   4    6.40    1.20 
  -8   5  -4    5.80    1.10 
  -8   5  -4    3.50    1.30 
  -9  -5  -4   27.20    3.70 
   9  -5   4   30.00    2.20 
  -9   5  -4   26.10    2.20 
   9   5   4   33.40    2.90 
  -9   5  -4   28.00    3.80 
   9   5   4   28.90    2.20 
 -10  -5  -4   12.90    3.70 
  10  -5   4   10.80    1.70 
 -10   5  -4   11.00    1.80 
  10   5   4   12.40    2.30 
  10   5   4   10.70    1.70 
 -10   5  -4   17.70    3.70 
  11  -5   4   37.50    2.80 
 -11  -5  -4   39.20    4.90 
  11   5   4   41.00    2.90 
 -11   5  -4   44.10    3.00 
 -13  -5  -4   14.10    5.30 
 -14  -5  -4   30.70    6.00 
 -15  -5  -4   61.49    6.70 
  16  -6  -4   48.60    3.50 
  16  -6  -4   46.00    3.50 
  16   6  -4   44.80    3.80 
 -16   6   4   50.79    7.20 
  15  -6  -4   42.50    3.30 
  15  -6  -4   44.70    3.30 
  15   6  -4   47.60    3.50 
 -15   6   4   43.20    6.30 
  14  -6  -4    0.60    1.00 
  14  -6  -4    2.40    1.10 
  14   6  -4    1.50    1.20 
 -14   6   4    0.10    1.80 
 -13  -6   4   26.00    5.20 
  13  -6  -4   14.30    1.90 
  13  -6  -4   18.20    2.10 
 -13   6   4    9.40    2.40 
  13   6  -4   15.20    2.00 
  12  -6  -4   59.29    3.40 
 -12  -6   4   63.59    4.30 
  12  -6  -4   59.99    3.50 
 -12  -6   4   60.39    6.00 
  12   6  -4   57.09    3.50 
 -12   6   4   55.99    6.30 
  11  -6  -4    1.30    0.80 
 -11  -6   4    9.60    3.80 
  11  -6  -4    0.40    0.90 
 -11  -6   4    1.40    1.00 
 -11   6   4    1.70    1.70 
  11   6  -4    2.30    0.90 
  10  -6  -4    0.80    0.80 
 -10  -6   4    2.40    1.10 
 -10  -6   4    2.10    1.30 
  10  -6  -4    2.30    0.80 
  10   6  -4    2.00    0.90 
 -10   6   4    0.90    1.70 
  -9  -6   4   67.69    5.00 
   9  -6  -4   62.89    3.40 
  -9  -6   4   54.59    4.10 
   9  -6  -4   61.59    3.30 
  -9   6   4   72.79    6.10 
   9   6  -4   65.09    3.40 
   8  -6  -4    2.40    0.70 
  -8  -6   4    1.70    1.00 
   8  -6  -4    2.80    0.80 
   8   6  -4    3.80    0.80 
  -7  -6   4   36.80    3.20 
   7  -6  -4   36.20    2.20 
   7  -6  -4   39.40    2.10 
  -7  -6   4   38.30    3.10 
   7   6  -4   39.90    2.20 
  -7   6   4   42.70    3.90 
  -6  -6   4  135.99    6.70 
   6  -6  -4  132.49    6.10 
   6  -6  -4  139.99    6.00 
  -6  -6   4  135.39    6.90 
   6   6  -4  137.49    6.10 
  -6   6   4  146.59    7.30 
  -6   6   4  142.99    6.10 
   5  -6  -4    0.40    0.40 
   5  -6  -4    0.00    0.50 
  -5  -6   4    0.00    0.70 
  -5  -6   4    0.20    0.60 
  -5   6   4    0.10    0.60 
  -5   6   4    0.40    0.40 
   5   6  -4    0.40    0.40 
  -4  -6   4  431.56   17.50 
   4  -6  -4  400.26   17.00 
  -4  -6   4  420.76   17.60 
   4  -6  -4  430.96   17.70 
   4  -6  -4  417.36   16.90 
  -4   6   4  406.06   17.20 
   4   6  -4  384.26   17.00 
  -3  -6   4   13.10    1.50 
  -3  -6   4   14.90    2.00 
   3  -6  -4   13.20    0.90 
   3  -6  -4   13.80    1.70 
   3  -6  -4   12.00    1.00 
  -3   6   4   11.70    1.40 
   3   6  -4   12.80    1.00 
   3   6  -4   14.10    0.80 
  -2  -6   4  117.69    5.40 
   2  -6  -4  119.59    5.20 
   2  -6  -4  126.69    6.00 
  -2  -6   4  123.19    5.60 
  -2  -6   4  129.99    5.90 
   2  -6  -4  127.89    5.30 
   2   6  -4  116.49    5.40 
  -2   6   4  125.39    5.70 
   2   6  -4  124.39    5.20 
  -1  -6   4  463.45   20.10 
   1  -6  -4  493.25   20.60 
   1  -6  -4  479.05   20.00 
  -1  -6   4  510.55   20.50 
  -1  -6   4  490.95   20.20 
  -1   6   4  498.65   20.50 
   1   6  -4  498.55   20.00 
   0  -6   4  201.68    8.00 
   0  -6  -4  169.88    8.10 
   0  -6  -4  174.58    7.40 
   0  -6   4  179.68    7.60 
   0  -6   4  164.88    7.50 
   0   6   4  174.68    7.30 
   0   6   4  181.18    8.00 
   0   6  -4  174.78    7.50 
   1  -6   4  417.16   18.50 
  -1  -6  -4  435.06   19.10 
   1  -6   4  487.05   18.80 
  -1  -6  -4  483.25   18.30 
   1   6   4  468.15   19.00 
   1   6   4  445.46   18.30 
  -1   6  -4  414.46   18.40 
  -2  -6  -4    4.70    1.50 
   2  -6   4    3.40    0.80 
  -2  -6  -4    4.80    0.60 
   2  -6   4    5.20    1.60 
  -2   6  -4    5.00    1.20 
   2   6   4    3.80    0.60 
  -2   6  -4    3.80    0.90 
   2   6   4    5.10    1.50 
   3  -6   4   91.89    4.40 
  -3  -6  -4  102.79    4.10 
   3  -6   4   99.59    4.70 
  -3  -6  -4   95.19    5.20 
  -3   6  -4   89.49    4.40 
   3   6   4   96.39    4.20 
  -3   6  -4   98.79    4.80 
   3   6   4   93.99    5.00 
   4  -6   4    2.80    0.80 
   4  -6   4    3.70    0.90 
  -4  -6  -4    1.80    0.70 
  -4   6  -4    2.40    0.90 
   4   6   4    4.30    0.80 
   4   6   4    2.10    0.80 
   5  -6   4   11.30    1.20 
   5  -6   4   12.00    1.70 
   5  -6   4   11.90    1.20 
  -5  -6  -4   12.90    2.20 
   5   6   4   12.20    1.90 
  -5   6  -4   13.80    2.80 
   5   6   4   12.40    1.10 
  -6  -6  -4  232.48   11.10 
   6  -6   4  232.28   10.00 
  -6   6  -4  233.58   11.00 
   6   6   4  225.58    9.90 
   6   6   4  234.48   10.70 
  -7  -6  -4  179.98    9.10 
   7  -6   4  169.68    7.80 
  -7   6  -4  177.68    9.00 
  -7   6  -4  173.38    7.90 
   7   6   4  174.48    8.50 
   7   6   4  176.08    7.70 
  -8  -6  -4    7.40    2.90 
   8  -6   4    8.00    1.40 
  -8   6  -4    9.20    3.50 
   8   6   4    8.70    2.30 
   8   6   4    8.30    1.30 
  -8   6  -4    7.20    1.50 
   9  -6   4   16.40    1.80 
  -9  -6  -4   17.80    3.70 
   9   6   4   17.20    1.80 
  -9   6  -4   16.80    1.90 
   9   6   4   17.30    2.60 
  -9   6  -4   20.10    3.60 
  10  -6   4    2.50    1.00 
 -10  -6  -4    2.50    1.40 
 -10   6  -4    8.90    3.50 
  10   6   4    2.50    1.00 
  10   6   4    1.60    0.90 
 -10   6  -4    3.50    1.10 
  11  -6   4    7.90    1.70 
 -11  -6  -4   12.10    4.30 
 -11   6  -4    8.50    1.90 
  11   6   4    7.60    1.70 
  13  -6   4   35.10    3.00 
 -13  -6  -4   45.50    6.40 
  13   6   4   39.80    3.10 
 -13   6  -4   35.80    3.10 
  16  -7  -4   21.10    2.70 
  16  -7  -4   16.90    2.50 
 -16   7   4   17.90    6.10 
  16   7  -4   19.00    2.80 
  15  -7  -4    1.90    1.30 
  15  -7  -4    0.40    1.10 
  15   7  -4    4.90    1.50 
 -15   7   4    0.90    2.10 
  14  -7  -4   25.60    2.50 
 -14  -7   4   34.50    5.70 
  14  -7  -4   30.60    2.80 
  14   7  -4   31.20    2.90 
 -14   7   4   19.90    5.60 
 -13  -7   4   43.70    5.90 
  13  -7  -4   33.10    2.60 
  13  -7  -4   33.60    2.70 
  13   7  -4   34.20    2.80 
 -13   7   4   23.80    5.40 
 -12  -7   4   28.40    3.00 
 -12  -7   4   27.90    5.00 
  12  -7  -4   25.00    2.20 
  12  -7  -4   25.40    2.40 
 -12   7   4   18.70    5.00 
  12   7  -4   26.10    2.30 
 -11  -7   4   86.89    5.30 
  11  -7  -4   95.19    4.70 
 -11  -7   4   94.29    6.70 
  11  -7  -4   95.59    4.70 
 -11   7   4   85.09    7.40 
  11   7  -4   91.19    4.80 
  10  -7  -4  179.88    7.90 
 -10  -7   4  170.88    8.50 
  10  -7  -4  181.88    7.90 
 -10  -7   4  166.78    9.50 
  10   7  -4  185.28    8.00 
 -10   7   4  172.98   10.50 
   9  -7  -4  169.88    7.50 
  -9  -7   4  156.08    8.80 
  -9  -7   4  160.98    8.10 
   9  -7  -4  170.68    7.40 
   9   7  -4  171.08    7.50 
  -9   7   4  167.18    9.60 
   8  -7  -4  101.29    4.60 
  -8  -7   4   88.09    5.50 
  -8  -7   4   95.89    5.90 
   8  -7  -4  100.89    4.70 
  -8   7   4  107.19    6.70 
   8   7  -4  100.89    4.70 
   7  -7  -4   12.10    1.20 
  -7  -7   4    9.50    2.40 
  -7  -7   4   10.70    2.40 
   7  -7  -4   10.60    1.30 
  -7   7   4   12.10    2.90 
   7   7  -4   12.10    1.20 
   6  -7  -4    0.20    0.60 
   6  -7  -4    0.60    0.50 
  -6  -7   4    0.20    0.90 
  -6  -7   4    0.30    0.70 
   6   7  -4    0.90    0.50 
  -6   7   4    0.30    0.40 
  -6   7   4    0.90    0.80 
   5  -7  -4  165.28    6.80 
  -5  -7   4  146.19    7.60 
   5  -7  -4  155.58    6.90 
  -5  -7   4  168.68    7.70 
  -5   7   4  159.18    7.10 
   5   7  -4  156.08    6.90 
  -5   7   4  166.38    8.00 
   4  -7  -4   12.20    0.90 
  -4  -7   4   16.00    2.20 
   4  -7  -4   14.00    2.00 
   4  -7  -4   12.70    1.10 
  -4  -7   4   13.20    1.80 
   4   7  -4   12.20    1.10 
  -4   7   4   10.40    1.40 
   3  -7  -4  188.98    8.10 
  -3  -7   4  200.88    8.80 
   3  -7  -4  197.18    8.80 
   3  -7  -4  191.98    8.00 
  -3  -7   4  195.78    8.60 
   3   7  -4  193.48    7.90 
  -3   7   4  186.88    8.50 
   3   7  -4  182.68    8.20 
  -2  -7   4    2.30    0.90 
   2  -7  -4    1.90    0.70 
   2  -7  -4    1.90    0.50 
  -2  -7   4    1.70    0.50 
   2  -7  -4    3.10    0.50 
   2   7  -4    3.40    0.80 
   2   7  -4    3.40    0.60 
  -2   7   4    2.60    0.70 
  -1  -7   4  314.27   12.70 
   1  -7  -4  301.27   12.30 
  -1  -7   4  278.87   12.50 
   1  -7  -4  303.67   13.10 
  -1  -7   4  281.37   12.90 
   1   7  -4  311.27   12.40 
  -1   7   4  305.27   12.90 
   0  -7  -4   69.39    4.10 
   0  -7   4   71.39    3.50 
   0  -7   4   65.89    3.40 
   0  -7   4   84.89    4.10 
   0  -7  -4   72.99    3.20 
   0   7   4   77.89    4.00 
   0   7   4   68.89    3.10 
   0   7  -4   70.29    3.30 
   1  -7   4  180.08    8.00 
   1  -7   4  180.48    8.00 
   1  -7   4  184.58    8.40 
  -1  -7  -4  195.38    7.70 
  -1  -7  -4  180.88    8.70 
   1   7   4  181.88    7.70 
   1   7   4  198.28    8.60 
  -1   7  -4  186.68    7.90 
  -2  -7  -4    8.80    1.80 
  -2  -7  -4    8.40    0.70 
   2  -7   4    8.40    1.00 
   2  -7   4    9.90    1.90 
   2   7   4    7.00    0.70 
  -2   7  -4    6.70    1.30 
  -2   7  -4    8.30    1.00 
   2   7   4    8.80    1.60 
  -3  -7  -4   13.30    2.10 
  -3  -7  -4   13.90    0.90 
   3  -7   4   12.10    1.90 
   3  -7   4   14.90    1.30 
  -3   7  -4   13.50    1.30 
   3   7   4   12.50    1.90 
   3   7   4   12.00    1.00 
  -3   7  -4   12.70    1.80 
   4  -7   4  103.39    4.80 
   4  -7   4   92.19    4.50 
   4  -7   4   93.99    4.50 
  -4  -7  -4   98.89    5.50 
  -4   7  -4   97.29    5.20 
   4   7   4   98.69    4.40 
   4   7   4   99.79    5.30 
   5  -7   4  111.39    5.20 
   5  -7   4  112.39    5.20 
   5  -7   4  111.89    5.30 
  -5  -7  -4  106.99    6.20 
   5   7   4  114.89    5.90 
   5   7   4  115.29    5.10 
  -5   7  -4  111.69    6.20 
  -6  -7  -4   82.89    5.30 
   6  -7   4   84.29    4.00 
   6  -7   4   79.49    4.00 
   6   7   4   84.69    3.90 
   6   7   4   76.39    4.70 
  -6   7  -4   79.59    5.50 
  -7  -7  -4   12.30    2.80 
   7  -7   4   15.00    1.60 
   7   7   4   15.20    1.50 
   7   7   4   13.70    2.50 
  -7   7  -4   14.70    3.70 
   8  -7   4   30.30    2.20 
  -8  -7  -4   26.60    3.80 
   8   7   4   25.00    3.00 
   8   7   4   25.40    2.00 
  -8   7  -4   24.10    4.00 
  -8   7  -4   27.90    2.20 
  -9  -7  -4    1.70    1.30 
   9  -7   4    2.80    0.90 
   9   7   4    1.30    0.80 
  -9   7  -4    1.00    0.90 
   9   7   4    0.70    1.00 
  -9   7  -4    0.30    1.30 
 -10  -7  -4   11.10    4.20 
  10  -7   4    7.10    1.60 
  10   7   4    6.50    1.20 
  10   7   4    8.90    2.60 
 -10   7  -4    9.60    1.80 
 -10   7  -4    9.50    3.70 
 -11  -7  -4    3.50    2.00 
  11  -7   4    3.80    1.10 
  11   7   4    2.40    1.40 
 -11   7  -4    2.70    1.20 
  11   7   4    0.20    0.90 
 -11   7  -4   11.40    3.90 
 -12  -7  -4   12.60    5.00 
  16  -8  -4    2.60    1.40 
 -16   8   4   -1.00    2.10 
  16   8  -4    4.10    1.60 
  15  -8  -4    0.90    1.30 
 -15  -8   4    3.90    2.90 
  15  -8  -4    1.50    1.20 
 -15   8   4   -2.10    2.00 
  15   8  -4    0.00    1.20 
  14  -8  -4    6.70    1.60 
 -14  -8   4    5.40    2.80 
  14  -8  -4    3.90    1.30 
  14   8  -4    6.20    1.50 
  13  -8  -4    6.70    1.30 
 -13  -8   4    7.20    2.50 
  13  -8  -4    9.40    2.10 
 -13   8   4    3.30    2.10 
  13   8  -4    7.50    1.50 
 -12  -8   4   28.60    3.20 
  12  -8  -4   20.50    2.10 
  12  -8  -4   28.40    2.40 
 -12  -8   4   24.00    5.20 
  12   8  -4   24.60    2.40 
 -12   8   4   13.70    5.00 
  11  -8  -4   57.69    3.40 
 -11  -8   4   49.10    4.00 
  11  -8  -4   54.39    3.20 
 -11  -8   4   54.29    5.70 
 -11   8   4   47.00    6.30 
  11   8  -4   59.39    3.40 
 -10  -8   4    8.10    2.50 
  10  -8  -4    7.70    1.70 
  10  -8  -4   12.00    1.50 
 -10  -8   4   11.20    3.80 
  10   8  -4    9.10    1.60 
  -9  -8   4   56.89    4.90 
  -9  -8   4   49.50    4.10 
   9  -8  -4   58.29    3.10 
   9  -8  -4   58.79    3.30 
  -9   8   4   61.19    5.70 
   9   8  -4   59.79    3.30 
   8  -8  -4   49.99    2.90 
  -8  -8   4   55.09    4.40 
  -8  -8   4   49.60    4.00 
   8  -8  -4   53.69    2.90 
   8   8  -4   50.49    2.90 
  -8   8   4   59.19    5.10 
   7  -8  -4   19.30    1.70 
  -7  -8   4   25.40    3.00 
   7  -8  -4   21.00    1.60 
  -7  -8   4   20.70    3.00 
  -7   8   4   25.40    3.50 
   7   8  -4   22.10    1.70 
  -6  -8   4   62.29    4.40 
   6  -8  -4   67.69    3.40 
  -6  -8   4   72.29    4.50 
   6  -8  -4   73.19    3.40 
  -6   8   4   73.09    4.80 
  -6   8   4   68.79    3.50 
   6   8  -4   70.09    3.50 
   5  -8  -4   12.50    1.20 
  -5  -8   4   12.50    2.10 
   5  -8  -4   12.30    1.00 
  -5  -8   4    9.90    2.40 
  -5   8   4   12.50    1.40 
   5   8  -4   13.10    1.20 
  -5   8   4   11.60    2.30 
   4  -8  -4   11.00    1.00 
   4  -8  -4   12.50    2.00 
   4  -8  -4   12.00    1.20 
  -4  -8   4   10.70    1.90 
  -4  -8   4    9.70    2.30 
  -4   8   4   11.50    1.40 
   4   8  -4   11.30    1.10 
  -3  -8   4  163.38    7.70 
   3  -8  -4  165.98    7.10 
  -3  -8   4  172.68    8.00 
   3  -8  -4  172.68    8.00 
   3  -8  -4  161.28    7.00 
   3   8  -4  166.28    7.20 
  -3   8   4  166.88    7.60 
   3   8  -4  165.08    6.90 
  -2  -8   4   75.79    4.00 
   2  -8  -4   75.39    3.40 
   2  -8  -4   75.99    4.30 
  -2  -8   4   78.49    4.40 
   2  -8  -4   72.49    3.30 
   2   8  -4   74.19    3.30 
  -2   8   4   75.39    4.00 
   2   8  -4   72.89    3.60 
  -1  -8   4    1.50    0.50 
   1  -8  -4    2.30    0.50 
   1  -8  -4    1.10    0.60 
  -1  -8   4    2.20    0.60 
  -1  -8   4    1.90    0.90 
   1   8  -4    2.60    0.50 
  -1   8   4    2.00    0.40 
  -1   8   4    2.00    0.70 
   0  -8  -4   16.90    2.10 
   0  -8  -4   18.90    1.10 
   0  -8   4   16.90    1.50 
   0  -8   4   16.20    2.20 
   0  -8   4   17.10    1.40 
   0   8   4   17.30    1.00 
   0   8  -4   15.50    1.20 
   0   8   4   19.30    2.00 
  -1  -8  -4  356.76   14.10 
   1  -8   4  314.07   14.30 
  -1  -8  -4  327.47   15.10 
   1  -8   4  331.27   14.40 
   1  -8   4  375.66   14.80 
  -1  -8  -4  354.86   14.70 
  -1   8  -4  346.77   14.30 
   1   8   4  357.06   15.00 
   1   8   4  326.27   14.10 
   2  -8   4  298.27   11.60 
  -2  -8  -4  268.07   10.90 
   2  -8   4  252.37   11.20 
  -2  -8  -4  266.67   12.10 
  -2  -8  -4  260.57   11.60 
   2   8   4  277.87   11.90 
  -2   8  -4  248.18   11.20 
   2   8   4  251.87   11.00 
  -2   8  -4  260.87   11.50 
   3  -8   4    0.30    0.50 
  -3  -8  -4   -0.60    0.70 
   3  -8   4    0.40    0.90 
  -3  -8  -4    0.10    0.60 
  -3  -8  -4    0.30    0.30 
  -3   8  -4    0.40    0.60 
   3   8   4    0.40    0.40 
   3   8   4    0.60    0.80 
   4  -8   4    9.00    1.20 
   4  -8   4   12.90    2.10 
  -4  -8  -4    8.80    2.30 
   4  -8   4    9.00    1.20 
   4   8   4   10.40    1.00 
  -4   8  -4   11.80    2.30 
   4   8   4    9.20    2.00 
   5  -8   4    7.10    1.90 
   5  -8   4    7.70    1.20 
   5  -8   4    8.30    1.20 
  -5  -8  -4   10.00    2.40 
   5   8   4    7.60    1.00 
   5   8   4    5.00    1.20 
  -5   8  -4    8.40    2.90 
   6  -8   4   64.29    3.40 
  -6  -8  -4   64.29    4.70 
   6  -8   4   61.39    3.40 
   6   8   4   67.79    3.30 
  -6   8  -4   65.59    5.20 
   6   8   4   65.39    4.40 
  -7  -8  -4  233.88   11.80 
   7  -8   4  241.38   10.40 
   7  -8   4  237.08   10.40 
   7   8   4  234.38   11.20 
  -7   8  -4  240.68   11.80 
   7   8   4  240.08   10.30 
  -8  -8  -4   34.80    4.30 
   8  -8   4   37.20    2.50 
  -8   8  -4   33.40    2.60 
   8   8   4   30.80    3.40 
   8   8   4   37.50    2.40 
  -8   8  -4   31.40    4.30 
   9  -8   4   25.70    2.30 
  -9  -8  -4   28.10    4.50 
   9   8   4   26.50    2.20 
   9   8   4   27.40    3.30 
  -9   8  -4   24.30    4.30 
  -9   8  -4   27.10    2.40 
 -10  -8  -4    2.30    1.60 
  10  -8   4    2.10    1.00 
  10   8   4    2.40    1.00 
  10   8   4    1.60    1.20 
 -10   8  -4   -0.20    1.30 
 -10   8  -4    1.30    1.10 
  11  -8   4    8.60    1.80 
 -11  -8  -4    8.90    2.50 
 -11   8  -4    9.50    2.10 
 -11   8  -4   17.80    4.10 
  11   8   4    9.10    1.80 
  11   8   4    9.80    2.80 
 -12  -8  -4    4.70    2.30 
  12  -8   4    2.70    1.20 
  12   8   4    1.20    1.10 
 -12   8  -4    2.60    1.30 
  13  -8   4   28.60    2.90 
 -13  -8  -4   45.60    6.60 
 -13   8  -4   33.90    3.20 
  13   8   4   29.80    3.00 
 -14  -8  -4   51.59    6.50 
  15  -9  -4    6.50    1.60 
  15  -9  -4    4.80    1.40 
  15   9  -4    6.60    1.70 
  14  -9  -4    2.50    1.40 
  14  -9  -4   -0.20    1.00 
  14   9  -4    4.80    1.40 
 -14   9   4    2.10    2.20 
  13  -9  -4    1.20    1.00 
 -13  -9   4    6.70    2.50 
  13  -9  -4    2.60    1.30 
 -13  -9   4    6.40    2.60 
  13   9  -4    2.20    1.20 
 -13   9   4    0.40    2.00 
  12  -9  -4   10.90    2.10 
  12  -9  -4   11.00    1.80 
 -12  -9   4   14.30    2.90 
 -12  -9   4   16.40    5.10 
  12   9  -4    8.70    2.00 
 -11  -9   4    2.70    1.70 
 -11  -9   4    1.80    1.20 
  11  -9  -4    0.50    1.00 
  11  -9  -4    0.40    0.80 
  11   9  -4    0.30    0.90 
 -11   9   4   -0.80    1.80 
  10  -9  -4    0.70    0.80 
 -10  -9   4    1.90    1.20 
 -10   9   4    0.90    1.60 
  10   9  -4    0.20    0.80 
   9  -9  -4   27.00    2.00 
  -9  -9   4   27.50    4.10 
   9  -9  -4   26.60    2.20 
  -9  -9   4   20.00    3.10 
  -9   9   4   29.20    4.60 
   9   9  -4   25.50    2.10 
  -8  -9   4   50.29    4.60 
   8  -9  -4   55.99    2.90 
  -8  -9   4   48.10    4.10 
   8  -9  -4   50.89    3.00 
   8   9  -4   56.39    3.10 
  -8   9   4   55.09    5.00 
   7  -9  -4    2.50    0.90 
  -7  -9   4    1.90    1.00 
  -7  -9   4    1.90    1.30 
   7  -9  -4    3.90    0.80 
  -7   9   4    2.50    1.20 
   7   9  -4    3.40    0.80 
   6  -9  -4    0.90    0.70 
  -6  -9   4    1.20    0.90 
  -6  -9   4    0.90    1.10 
   6  -9  -4    1.30    0.60 
  -6   9   4    1.60    0.60 
   6   9  -4    1.50    0.70 
  -6   9   4    1.20    1.00 
   5  -9  -4    1.30    0.50 
   5  -9  -4    0.30    0.60 
  -5  -9   4    0.60    0.70 
  -5  -9   4    0.30    1.10 
  -5   9   4    1.50    0.60 
  -5   9   4    0.80    0.80 
   5   9  -4    1.10    0.60 
   4  -9  -4   10.10    1.10 
   4  -9  -4   10.30    2.10 
   4  -9  -4    8.20    0.90 
  -4  -9   4    9.60    2.60 
  -4  -9   4    9.30    2.00 
  -4   9   4    8.70    1.50 
   4   9  -4    9.60    1.10 
  -3  -9   4   49.20    3.20 
   3  -9  -4   50.29    2.50 
  -3  -9   4   53.09    3.70 
   3  -9  -4   48.60    2.40 
   3  -9  -4   51.59    3.50 
  -3   9   4   46.10    3.00 
   3   9  -4   51.39    2.30 
   3   9  -4   49.00    2.60 
  -2  -9   4   40.70    2.70 
   2  -9  -4   40.70    2.10 
   2  -9  -4   38.30    2.00 
   2  -9  -4   39.30    3.10 
  -2  -9   4   48.30    3.40 
   2   9  -4   39.80    2.30 
   2   9  -4   40.20    2.00 
  -2   9   4   40.90    2.80 
  -1  -9   4    5.00    1.30 
   1  -9  -4    4.50    0.80 
  -1  -9   4    2.20    1.10 
  -1  -9   4    4.10    0.80 
   1   9  -4    4.20    0.90 
  -1   9   4    5.10    1.50 
  -1   9   4    3.90    0.70 
   0  -9   4    1.40    1.00 
   0  -9  -4    1.40    0.50 
   0  -9   4    1.30    0.50 
   0  -9  -4    0.10    0.80 
   0  -9  -4    0.50    0.70 
   0  -9   4    0.20    0.60 
   0   9   4    1.40    0.80 
   0   9   4    1.40    0.40 
   0   9  -4    0.50    0.60 
  -1  -9  -4  525.75   21.80 
  -1  -9  -4  575.84   22.60 
   1  -9   4  526.75   22.30 
   1  -9   4  494.35   22.10 
   1  -9   4  597.04   22.70 
  -1  -9  -4  522.55   22.90 
  -1   9  -4  540.45   22.10 
   1   9   4  508.15   21.80 
  -2  -9  -4    1.00    0.80 
   2  -9   4    0.70    0.60 
  -2  -9  -4    1.90    0.80 
  -2  -9  -4    1.90    0.40 
   2  -9   4    1.70    1.00 
  -2   9  -4    2.40    0.70 
  -2   9  -4    1.80    0.60 
   2   9   4    1.40    0.50 
   3  -9   4  170.28    7.80 
  -3  -9  -4  175.48    8.80 
  -3  -9  -4  191.58    8.40 
  -3  -9  -4  179.48    7.40 
   3  -9   4  179.78    8.20 
   3   9   4  173.18    7.60 
  -3   9  -4  176.28    8.30 
   4  -9   4    1.70    0.70 
   4  -9   4    0.80    1.00 
  -4  -9  -4    0.30    0.90 
  -4  -9  -4    1.00    0.80 
   4  -9   4    1.90    0.70 
   4   9   4    2.10    0.60 
  -4   9  -4    0.90    0.80 
   4   9   4    1.50    0.90 
   5  -9   4   13.50    1.50 
   5  -9   4   14.00    1.50 
  -5  -9  -4   13.30    2.70 
   5  -9   4   12.60    2.40 
   5   9   4   15.50    1.30 
  -5   9  -4   16.40    3.00 
   5   9   4   13.10    2.40 
   6  -9   4  175.48    7.90 
   6  -9   4  176.98    7.80 
  -6  -9  -4  176.38    9.30 
   6   9   4  168.68    8.80 
  -6   9  -4  165.98    9.10 
   6   9   4  179.28    7.70 
   7  -9   4    4.20    1.00 
   7  -9   4    3.00    0.90 
  -7  -9  -4    2.00    1.20 
   7   9   4    3.50    1.30 
   7   9   4    3.30    0.90 
  -7   9  -4    2.20    1.40 
  -8  -9  -4   64.09    5.50 
   8  -9   4   61.29    3.60 
   8   9   4   62.69    3.50 
  -8   9  -4   59.89    5.50 
  -8   9  -4   62.09    3.80 
   8   9   4   62.59    4.60 
  -9  -9  -4    0.60    1.30 
   9  -9   4    1.20    1.00 
   9   9   4    1.60    0.90 
   9   9   4    0.90    1.10 
  -9   9  -4   -0.20    0.90 
  -9   9  -4   -0.20    1.40 
 -10  -9  -4   65.39    6.30 
  10  -9   4   67.39    3.90 
 -10   9  -4   54.79    5.80 
  10   9   4   61.89    3.70 
  10   9   4   66.59    5.00 
 -10   9  -4   67.69    4.10 
  11  -9   4   38.10    3.00 
 -11  -9  -4   41.10    6.20 
  11   9   4   37.30    4.10 
  11   9   4   38.70    2.90 
 -11   9  -4   35.00    5.00 
 -11   9  -4   37.60    3.20 
  12  -9   4   28.80    2.80 
 -12  -9  -4   35.80    6.10 
 -12   9  -4   43.50    5.50 
  12   9   4   33.60    3.00 
 -12   9  -4   32.90    3.20 
  13  -9   4    5.90    1.50 
 -13  -9  -4    3.40    2.90 
 -13   9  -4    2.00    1.40 
  13   9   4    3.40    1.40 
  14   9   4    1.60    1.30 
 -14   9  -4    0.90    1.50 
  15 -10  -4   15.40    2.80 
 -13 -10   4   17.00    5.60 
  13 -10  -4    4.70    1.40 
  13 -10  -4    0.90    1.00 
  13  10  -4    3.50    1.30 
 -13  10   4    3.40    2.30 
  12 -10  -4   13.10    1.90 
 -12 -10   4   21.10    3.40 
 -12 -10   4   22.00    5.50 
  12 -10  -4   16.50    2.30 
  12  10  -4   11.60    2.20 
  11 -10  -4    1.70    1.00 
 -11 -10   4    2.10    1.90 
  11 -10  -4    3.80    1.20 
 -11 -10   4    2.70    1.30 
 -11  10   4   -0.20    1.80 
  11  10  -4    3.20    1.10 
  10 -10  -4    0.70    0.90 
  10 -10  -4    0.10    0.70 
 -10 -10   4    1.60    1.40 
 -10 -10   4    0.20    1.20 
 -10  10   4   -0.40    1.60 
  10  10  -4    0.50    0.90 
  -9 -10   4    0.20    1.20 
   9 -10  -4   -0.30    0.70 
  -9 -10   4    0.10    1.20 
   9 -10  -4   -1.80    0.80 
  -9  10   4   -0.30    1.40 
   9  10  -4    1.20    0.90 
   8 -10  -4    3.60    1.00 
   8 -10  -4    4.20    0.90 
  -8 -10   4    3.20    1.30 
  -8 -10   4    1.60    1.20 
  -8  10   4    2.10    1.40 
   8  10  -4    4.40    1.00 
  -7 -10   4   14.30    3.10 
   7 -10  -4   11.10    1.70 
   7 -10  -4   15.00    1.40 
  -7  10   4   16.00    3.40 
   7  10  -4   16.30    1.70 
  -6 -10   4    4.40    1.50 
  -6 -10   4    2.60    1.10 
   6 -10  -4    3.90    0.90 
   6 -10  -4    4.70    1.00 
  -6  10   4    2.80    1.20 
  -6  10   4    2.90    0.80 
   6  10  -4    3.80    0.90 
   5 -10  -4  222.78   10.00 
  -5 -10   4  224.68   11.00 
  -5 -10   4  246.68   11.10 
   5 -10  -4  245.08   10.00 
   5  10  -4  232.78   10.10 
  -5  10   4  246.68   11.50 
  -5  10   4  230.08   10.40 
   4 -10  -4    2.90    0.60 
   4 -10  -4    2.20    0.90 
  -4 -10   4    1.80    0.80 
   4 -10  -4    2.40    0.70 
  -4 -10   4    0.80    1.20 
   4  10  -4    2.70    0.70 
  -4  10   4    1.90    0.70 
   3 -10  -4    1.90    0.90 
  -3 -10   4    4.60    1.80 
   3 -10  -4    3.10    0.70 
   3 -10  -4    3.40    0.80 
  -3 -10   4    2.70    1.20 
   3  10  -4    4.80    0.70 
   3  10  -4    3.10    0.70 
  -3  10   4    3.10    0.80 
   2 -10  -4  233.38   10.30 
   2 -10  -4  235.48   10.40 
  -2 -10   4  248.68   11.00 
   2 -10  -4  241.48   11.40 
  -2 -10   4  277.67   11.40 
   2  10  -4  247.28   10.60 
   2  10  -4  248.08   10.30 
  -2  10   4  248.68   11.10 
  -1 -10   4    0.60    0.60 
  -1 -10   4    0.00    1.10 
   1 -10  -4    0.20    0.70 
  -1 -10   4    0.60    0.70 
   1 -10  -4    0.50    0.50 
   1  10  -4    0.50    0.60 
  -1  10   4    1.30    0.80 
  -1  10   4    0.20    0.40 
   0 -10   4    1.20    0.70 
   0 -10   4    1.20    0.60 
   0 -10   4    1.50    1.10 
   0 -10  -4    0.00    0.90 
   0 -10  -4    1.10    0.80 
   0 -10  -4    1.60    0.50 
   0  10  -4    1.40    0.60 
   0  10   4    0.40    0.40 
   0  10   4    1.50    0.80 
  -1 -10  -4  353.06   14.20 
   1 -10   4  333.17   14.80 
   1 -10   4  325.47   14.50 
   1 -10   4  366.46   15.10 
  -1 -10  -4  356.56   15.10 
  -1 -10  -4  344.07   15.50 
   1  10   4  329.87   14.20 
  -1  10  -4  355.86   14.50 
   2 -10   4   25.90    2.00 
   2 -10   4   33.20    3.10 
  -2 -10  -4   28.20    1.50 
  -2 -10  -4   27.80    3.00 
  -2 -10  -4   29.70    2.70 
  -2  10  -4   29.30    2.00 
   2  10   4   26.00    1.60 
   3 -10   4   21.50    2.80 
  -3 -10  -4   19.40    2.50 
   3 -10   4   19.90    1.70 
  -3 -10  -4   18.20    2.80 
  -3  10  -4   18.40    1.70 
   3  10   4   19.40    1.40 
  -3  10  -4   18.70    2.30 
  -4 -10  -4   41.60    3.40 
   4 -10   4   45.10    2.70 
   4 -10   4   45.20    2.60 
   4 -10   4   43.30    3.40 
  -4 -10  -4   45.80    4.00 
   4  10   4   49.00    3.70 
  -4  10  -4   47.80    3.60 
   4  10   4   47.30    2.50 
   5 -10   4   43.60    2.80 
  -5 -10  -4   44.70    4.30 
   5 -10   4   43.20    2.70 
  -5  10  -4   45.10    4.00 
   5  10   4   45.90    2.50 
   5  10   4   43.90    3.70 
  -6 -10  -4   35.00    4.10 
   6 -10   4   33.40    2.40 
   6 -10   4   34.50    2.40 
   6  10   4   34.00    2.20 
  -6  10  -4   30.80    4.20 
   6  10   4   33.30    3.50 
   7 -10   4   15.40    1.80 
  -7 -10  -4   17.20    3.90 
  -7  10  -4   10.40    4.10 
   7  10   4   14.90    3.00 
   7  10   4   14.20    1.60 
  -7  10  -4   15.00    2.00 
   8 -10   4  217.58    9.60 
  -8 -10  -4  218.48   11.60 
   8  10   4  203.08   10.60 
   8  10   4  216.88    9.50 
  -8  10  -4  206.28   11.20 
  -8  10  -4  212.88    9.80
[truncated: 1,154,058 more chars]
